# Supplementary material for: Nuclear Phosphoinositides: Their Regulation and Roles in Nuclear Functions
Source: MDPI journal article supplement (doi:10.3390/ijms20122991), 2019-06-19
Supplement: s1 [file supplementary_table_1.xlsx]

## Sheet: all_PIP_binders_nuclear
OAS1	2'-5'-oligoadenylate synthetase 1(OAS1)	GO:0001730~2'-5'-oligoadenylate synthetase activity,GO:0003725~double-stranded RNA binding,GO:0005515~protein binding,GO:0005524~ATP binding,GO:0008270~zinc ion binding,GO:0016740~transferase activity,GO:0016779~nucleotidyltransferase activity,GO:0046872~metal ion binding,		3D-structure,Alternative splicing,Antiviral defense,ATP-binding,Complete proteome,Cytoplasm,Endoplasmic reticulum,Immunity,Innate immunity,Magnesium,Metal-binding,Microsome,Mitochondrion,Nucleotide-binding,Nucleotidyltransferase,Nucleus,Polymorphism,Proteomics identification,Reference proteome,RNA-binding,Secreted,Transferase,
XRN2	5'-3' exoribonuclease 2(XRN2)	GO:0000175~3'-5'-exoribonuclease activity,GO:0001147~transcription termination site sequence-specific DNA binding,GO:0003676~nucleic acid binding,GO:0004518~nuclease activity,GO:0004534~5'-3' exoribonuclease activity,GO:0005515~protein binding,GO:0008409~5'-3' exonuclease activity,GO:0044822~poly(A) RNA binding,GO:0046872~metal ion binding,		Acetylation,Alternative splicing,Complete proteome,DNA-binding,Exonuclease,Hydrolase,Metal-binding,Methylation,mRNA processing,Nuclease,Nucleus,Phosphoprotein,Polymorphism,Reference proteome,Transcription,Transcription regulation,Transcription termination,Zinc,Zinc-finger,
AHNAK	AHNAK nucleoprotein(AHNAK)	GO:0005515~protein binding,GO:0044548~S100 protein binding,GO:0044822~poly(A) RNA binding,GO:0097493~structural molecule activity conferring elasticity,GO:0098641~cadherin binding involved in cell-cell adhesion,	SM00228:PDZ,	3D-structure,Acetylation,Alternative splicing,Complete proteome,Isopeptide bond,Methylation,Nucleus,Phosphoprotein,Polymorphism,Proteomics identification,Reference proteome,Repeat,Ubl conjugation,Viral nucleoprotein,Virion,
AKT2	AKT serine/threonine kinase 2(AKT2)	GO:0004672~protein kinase activity,GO:0004674~protein serine/threonine kinase activity,GO:0005515~protein binding,GO:0005524~ATP binding,	SM00133:S_TK_X,SM00220:S_TKc,SM00233:PH,	3D-structure,Acetylation,Alternative splicing,Apoptosis,ATP-binding,Carbohydrate metabolism,Cell membrane,Complete proteome,Cytoplasm,Developmental protein,Diabetes mellitus,Disease mutation,Disulfide bond,Endosome,Glucose metabolism,Glycogen biosynthesis,Glycogen metabolism,Glycoprotein,Isopeptide bond,Kinase,Membrane,Nucleotide-binding,Nucleus,Phosphoprotein,Polymorphism,Proteomics identificati…
ABCF2	ATP binding cassette subfamily F member 2(ABCF2)	GO:0003677~DNA binding,GO:0005215~transporter activity,GO:0005524~ATP binding,GO:0016887~ATPase activity,	SM00382:AAA,SM00427:H2B,	Acetylation,Alternative splicing,ATP-binding,Chromosome,Coiled coil,Complete proteome,DNA-binding,Nucleosome core,Nucleotide-binding,Nucleus,Phosphoprotein,Proteomics identification,Reference proteome,Repeat,
ATP5J2	ATP synthase, H+ transporting, mitochondrial Fo complex subunit F2(ATP5J2)	GO:0016887~ATPase activity,GO:0022857~transmembrane transporter activity,		Acetylation,Alternative splicing,ATP synthesis,CF(0),Complete proteome,Hydrogen ion transport,Ion transport,Membrane,Mitochondrion,Mitochondrion inner membrane,Phosphoprotein,Proteomics identification,Reference proteome,Transmembrane,Transmembrane helix,Transport,
ALYREF	Aly/REF export factor(ALYREF)	GO:0000166~nucleotide binding,GO:0003676~nucleic acid binding,GO:0005515~protein binding,GO:0044822~poly(A) RNA binding,	SM00360:RRM,SM01218:SM01218,	3D-structure,Acetylation,Chaperone,Citrullination,Coiled coil,Complete proteome,Cytoplasm,Direct protein sequencing,Host-virus interaction,Methylation,mRNA processing,mRNA splicing,mRNA transport,Nucleus,Phosphoprotein,Proteomics identification,Reference proteome,RNA-binding,Spliceosome,Transport,
BTK	Bruton tyrosine kinase(BTK)	GO:0004672~protein kinase activity,GO:0004713~protein tyrosine kinase activity,GO:0004715~non-membrane spanning protein tyrosine kinase activity,GO:0005102~receptor binding,GO:0005515~protein binding,GO:0005524~ATP binding,GO:0005547~phosphatidylinositol-3,4,5-trisphosphate binding,GO:0016301~kinase activity,GO:0042802~identical protein binding,GO:0046872~metal ion binding,	SM00107:BTK,SM00219:TyrKc,SM00233:PH,SM00252:SH2,SM00326:SH3,	3D-structure,Acetylation,Adaptive immunity,Alternative promoter usage,Apoptosis,ATP-binding,Cell membrane,Complete proteome,Cytoplasm,Direct protein sequencing,Disease mutation,Immunity,Innate immunity,Kinase,Lipid-binding,Membrane,Metal-binding,Nucleotide-binding,Nucleus,Phosphoprotein,Polymorphism,Proteomics identification,Reference proteome,SH2 domain,SH3 domain,Transcription,Transcription reg…
CNBP	CCHC-type zinc finger nucleic acid binding protein(CNBP)	GO:0003676~nucleic acid binding,GO:0003677~DNA binding,GO:0003697~single-stranded DNA binding,GO:0003700~transcription factor activity, sequence-specific DNA binding,GO:0003727~single-stranded RNA binding,GO:0005515~protein binding,GO:0008270~zinc ion binding,GO:0044822~poly(A) RNA binding,	SM00343:ZnF_C2HC,	Acetylation,Alternative splicing,Complete proteome,Cytoplasm,DNA-binding,Endoplasmic reticulum,Metal-binding,Methylation,Phosphoprotein,Proteomics identification,Reference proteome,Repeat,Repressor,Transcription,Transcription regulation,Zinc,Zinc-finger,
CREBBP	CREB binding protein(CREBBP)	GO:0000987~core promoter proximal region sequence-specific DNA binding,GO:0001078~transcriptional repressor activity, RNA polymerase II core promoter proximal region sequence-specific binding,GO:0001085~RNA polymerase II transcription factor binding,GO:0001102~RNA polymerase II activating transcription factor binding,GO:0001105~RNA polymerase II transcription coactivator activity,GO:0001191~trans…	SM00291:ZnF_ZZ,SM00297:BROMO,SM00551:ZnF_TAZ,SM01250:SM01250,	3D-structure,Acetylation,Activator,Acyltransferase,Alternative splicing,Biological rhythms,Bromodomain,Chromosomal rearrangement,Complete proteome,Cytoplasm,Disease mutation,Host-virus interaction,Isopeptide bond,Metal-binding,Methylation,Nucleus,Phosphoprotein,Polymorphism,Proteomics identification,Reference proteome,Repeat,Transcription,Transcription regulation,Transferase,Ubl conjugation,Zinc,…
CRTC3	CREB regulated transcription coactivator 3(CRTC3)	GO:0008140~cAMP response element binding protein binding,		Activator,Alternative splicing,Complete proteome,Cytoplasm,Host-virus interaction,Nucleus,Phosphoprotein,Polymorphism,Proteomics identification,Reference proteome,Transcription,Transcription regulation,
CELF1	CUGBP, Elav-like family member 1(CELF1)	GO:0000166~nucleotide binding,GO:0000900~translation repressor activity, nucleic acid binding,GO:0003676~nucleic acid binding,GO:0003723~RNA binding,GO:0003729~mRNA binding,GO:0005515~protein binding,GO:0031369~translation initiation factor binding,GO:0042835~BRE binding,GO:0044822~poly(A) RNA binding,	SM00360:RRM,	3D-structure,Acetylation,Activator,Alternative splicing,Complete proteome,Cytoplasm,mRNA processing,mRNA splicing,Nucleus,Phosphoprotein,Proteomics identification,Reference proteome,Repeat,RNA-binding,
CELF2	CUGBP, Elav-like family member 2(CELF2)	GO:0000166~nucleotide binding,GO:0003676~nucleic acid binding,GO:0003723~RNA binding,GO:0044822~poly(A) RNA binding,	SM00360:RRM,	3D-structure,Alternative splicing,Complete proteome,Cytoplasm,mRNA processing,Nucleus,Polymorphism,Proteomics identification,Reference proteome,Repeat,Repressor,RNA-binding,
CXXC1	CXXC finger protein 1(CXXC1)	GO:0000987~core promoter proximal region sequence-specific DNA binding,GO:0003677~DNA binding,GO:0005515~protein binding,GO:0008270~zinc ion binding,GO:0042800~histone methyltransferase activity (H3-K4 specific),GO:0045322~unmethylated CpG binding,	SM00249:PHD,	3D-structure,Acetylation,Activator,Alternative splicing,Coiled coil,Complete proteome,DNA-binding,Isopeptide bond,Metal-binding,Nucleus,Phosphoprotein,Proteomics identification,Reference proteome,Transcription,Transcription regulation,Ubl conjugation,Zinc,Zinc-finger,
DAZAP1	DAZ associated protein 1(DAZAP1)	GO:0000166~nucleotide binding,GO:0003676~nucleic acid binding,GO:0003723~RNA binding,GO:0035613~RNA stem-loop binding,GO:0044822~poly(A) RNA binding,	SM00360:RRM,	3D-structure,Acetylation,Alternative splicing,Complete proteome,Cytoplasm,Developmental protein,Differentiation,Direct protein sequencing,Methylation,Nucleus,Polymorphism,Proteomics identification,Reference proteome,Repeat,RNA-binding,Spermatogenesis,
DDX1	DEAD-box helicase 1(DDX1)	GO:0003676~nucleic acid binding,GO:0003677~DNA binding,GO:0003682~chromatin binding,GO:0003712~transcription cofactor activity,GO:0003724~RNA helicase activity,GO:0003725~double-stranded RNA binding,GO:0004004~ATP-dependent RNA helicase activity,GO:0004386~helicase activity,GO:0004518~nuclease activity,GO:0004527~exonuclease activity,GO:0005515~protein binding,GO:0005524~ATP binding,GO:0008026~AT…	SM00449:SPRY,SM00487:DEXDc,SM00490:HELICc,	3D-structure,Acetylation,Activator,Alternative splicing,ATP-binding,Complete proteome,Cytoplasm,DNA-binding,Exonuclease,Helicase,Hydrolase,mRNA processing,Nuclease,Nucleotide-binding,Nucleus,Phosphoprotein,Proteomics identification,Reference proteome,RNA-binding,Transcription,Transcription regulation,tRNA processing,
DDX17	DEAD-box helicase 17(DDX17)	GO:0003676~nucleic acid binding,GO:0003713~transcription coactivator activity,GO:0003723~RNA binding,GO:0003724~RNA helicase activity,GO:0004004~ATP-dependent RNA helicase activity,GO:0004386~helicase activity,GO:0005515~protein binding,GO:0005524~ATP binding,GO:0008186~RNA-dependent ATPase activity,GO:0030331~estrogen receptor binding,GO:0044822~poly(A) RNA binding,	SM00487:DEXDc,SM00490:HELICc,	Alternative initiation,Alternative splicing,ATP-binding,Complete proteome,Helicase,Hydrolase,Isopeptide bond,Methylation,Nucleotide-binding,Nucleus,Phosphoprotein,Proteomics identification,Reference proteome,RNA-binding,Transcription,Transcription regulation,Ubl conjugation,
DDX3X	DEAD-box helicase 3, X-linked(DDX3X)	GO:0003676~nucleic acid binding,GO:0003677~DNA binding,GO:0003723~RNA binding,GO:0003924~GTPase activity,GO:0004003~ATP-dependent DNA helicase activity,GO:0004004~ATP-dependent RNA helicase activity,GO:0004386~helicase activity,GO:0005515~protein binding,GO:0005524~ATP binding,GO:0008134~transcription factor binding,GO:0008143~poly(A) binding,GO:0008190~eukaryotic initiation factor 4E binding,GO:…	SM00487:DEXDc,SM00490:HELICc,	3D-structure,Acetylation,Alternative splicing,Apoptosis,ATP-binding,Chromosome partition,Complete proteome,Cytoplasm,Direct protein sequencing,Disease mutation,DNA-binding,Helicase,Host-virus interaction,Hydrolase,Immunity,Innate immunity,Isopeptide bond,Membrane,Mental retardation,Methylation,Mitochondrion,Mitochondrion outer membrane,Nucleotide-binding,Nucleus,Phosphoprotein,Polymorphism,Proteo…
DDX5	DEAD-box helicase 5(DDX5)	GO:0003676~nucleic acid binding,GO:0003712~transcription cofactor activity,GO:0003713~transcription coactivator activity,GO:0003724~RNA helicase activity,GO:0004004~ATP-dependent RNA helicase activity,GO:0005515~protein binding,GO:0005516~calmodulin binding,GO:0005524~ATP binding,GO:0019899~enzyme binding,GO:0030331~estrogen receptor binding,GO:0036002~pre-mRNA binding,GO:0044822~poly(A) RNA bind…	SM00487:DEXDc,SM00490:HELICc,SM01414:SM01414,	3D-structure,Acetylation,Alternative splicing,ATP-binding,Biological rhythms,Complete proteome,Helicase,Hydrolase,Isopeptide bond,mRNA processing,mRNA splicing,Nucleotide-binding,Nucleus,Phosphoprotein,Polymorphism,Proteomics identification,Reference proteome,RNA-binding,Spliceosome,Transcription,Transcription regulation,Ubl conjugation,
DDX6	DEAD-box helicase 6(DDX6)	GO:0003676~nucleic acid binding,GO:0003724~RNA helicase activity,GO:0004004~ATP-dependent RNA helicase activity,GO:0004386~helicase activity,GO:0005515~protein binding,GO:0005524~ATP binding,GO:0019904~protein domain specific binding,GO:0044822~poly(A) RNA binding,GO:0098641~cadherin binding involved in cell-cell adhesion,	SM00487:DEXDc,SM00490:HELICc,	3D-structure,ATP-binding,Chromosomal rearrangement,Complete proteome,Cytoplasm,Helicase,Hydrolase,Nucleotide-binding,Nucleus,Phosphoprotein,Proteomics identification,Proto-oncogene,Reference proteome,RNA-binding,Ubl conjugation,
DHX15	DEAH-box helicase 15(DHX15)	GO:0003724~RNA helicase activity,GO:0003725~double-stranded RNA binding,GO:0004004~ATP-dependent RNA helicase activity,GO:0005515~protein binding,GO:0005524~ATP binding,GO:0044822~poly(A) RNA binding,	SM00487:DEXDc,SM00490:HELICc,SM00847:SM00847,	Acetylation,ATP-binding,Complete proteome,Helicase,Hydrolase,mRNA processing,mRNA splicing,Nucleotide-binding,Nucleus,Phosphoprotein,Reference proteome,
DEK	DEK proto-oncogene(DEK)	GO:0003677~DNA binding,GO:0003682~chromatin binding,GO:0042393~histone binding,GO:0044822~poly(A) RNA binding,	SM00513:SAP,	3D-structure,Acetylation,Alternative splicing,Chromatin regulator,Chromosomal rearrangement,Coiled coil,Complete proteome,Direct protein sequencing,DNA-binding,Nucleus,Phosphoprotein,Polymorphism,Proteomics identification,Proto-oncogene,Reference proteome,
DDX21	DExD-box helicase 21(DDX21)	GO:0003725~double-stranded RNA binding,GO:0004004~ATP-dependent RNA helicase activity,GO:0005515~protein binding,GO:0005524~ATP binding,GO:0019843~rRNA binding,GO:0030515~snoRNA binding,GO:0044822~poly(A) RNA binding,GO:0097322~7SK snRNA binding,	SM00487:DEXDc,SM00490:HELICc,	3D-structure,Acetylation,Alternative splicing,ATP-binding,Complete proteome,Direct protein sequencing,Helicase,Hydrolase,Isopeptide bond,Nucleotide-binding,Nucleus,Phosphoprotein,Polymorphism,Reference proteome,Repeat,RNA-binding,rRNA processing,Transcription,Ubl conjugation,
DDX39B	DExD-box helicase 39B(DDX39B)	GO:0003676~nucleic acid binding,GO:0004004~ATP-dependent RNA helicase activity,GO:0005515~protein binding,GO:0005524~ATP binding,GO:0008186~RNA-dependent ATPase activity,GO:0016887~ATPase activity,GO:0017070~U6 snRNA binding,GO:0030621~U4 snRNA binding,GO:0032403~protein complex binding,GO:0042802~identical protein binding,GO:0043008~ATP-dependent protein binding,GO:0044822~poly(A) RNA binding,	SM00487:DEXDc,SM00490:HELICc,	3D-structure,Acetylation,Alternative splicing,ATP-binding,Complete proteome,Cytoplasm,Helicase,Hydrolase,Isopeptide bond,mRNA processing,mRNA splicing,mRNA transport,Nucleotide-binding,Nucleus,Phosphoprotein,Proteomics identification,Reference proteome,RNA-binding,Spliceosome,Transport,Ubl conjugation,
DDX52	DExD-box helicase 52(DDX52)	GO:0003676~nucleic acid binding,GO:0004004~ATP-dependent RNA helicase activity,GO:0004386~helicase activity,GO:0005524~ATP binding,GO:0044822~poly(A) RNA binding,	SM00487:DEXDc,SM00490:HELICc,	3D-structure,Acetylation,ATP-binding,Complete proteome,Helicase,Hydrolase,Nucleotide-binding,Nucleus,Phosphoprotein,Polymorphism,Proteomics identification,Reference proteome,RNA-binding,
DIMT1	DIM1 dimethyladenosine transferase 1 homolog(DIMT1)	GO:0000179~rRNA (adenine-N6,N6-)-dimethyltransferase activity,GO:0044822~poly(A) RNA binding,GO:0052909~18S rRNA (adenine(1779)-N(6)/adenine(1780)-N(6))-dimethyltransferase activity,	SM00650:rADc,	3D-structure,Complete proteome,Methyltransferase,Nucleus,Proteomics identification,Reference proteome,RNA-binding,rRNA processing,S-adenosyl-L-methionine,Transferase,
LIG1	DNA ligase 1(LIG1)	GO:0003677~DNA binding,GO:0003909~DNA ligase activity,GO:0003910~DNA ligase (ATP) activity,GO:0003950~NAD+ ADP-ribosyltransferase activity,GO:0005524~ATP binding,GO:0016874~ligase activity,GO:0046872~metal ion binding,		3D-structure,Acetylation,Alternative splicing,ATP-binding,Cell cycle,Cell division,Coiled coil,Complete proteome,DNA damage,DNA recombination,DNA repair,DNA replication,Isopeptide bond,Ligase,Magnesium,Metal-binding,Nucleotide-binding,Nucleus,Phosphoprotein,Polymorphism,Proteomics identification,Reference proteome,
LIG3	DNA ligase 3(LIG3)	GO:0003677~DNA binding,GO:0003909~DNA ligase activity,GO:0003910~DNA ligase (ATP) activity,GO:0005515~protein binding,GO:0005524~ATP binding,GO:0008270~zinc ion binding,GO:0016874~ligase activity,	SM00292:BRCT,SM01336:SM01336,	3D-structure,Alternative initiation,Alternative splicing,ATP-binding,Cell cycle,Cell division,Complete proteome,DNA damage,DNA recombination,DNA repair,DNA replication,Ligase,Magnesium,Metal-binding,Mitochondrion,Nucleotide-binding,Nucleus,Phosphoprotein,Polymorphism,Proteomics identification,Reference proteome,Transit peptide,Zinc,Zinc-finger,
DNMT1	DNA methyltransferase 1(DNMT1)	GO:0003677~DNA binding,GO:0003682~chromatin binding,GO:0003723~RNA binding,GO:0003886~DNA (cytosine-5-)-methyltransferase activity,GO:0005515~protein binding,GO:0008168~methyltransferase activity,GO:0008270~zinc ion binding,GO:0008327~methyl-CpG binding,GO:0009008~DNA-methyltransferase activity,GO:1990841~promoter-specific chromatin binding,	SM00439:BAH,SM01137:SM01137,	3D-structure,Acetylation,Activator,Alternative splicing,Chromatin regulator,Complete proteome,Deafness,Disease mutation,DNA-binding,Isopeptide bond,Metal-binding,Methylation,Methyltransferase,Neuropathy,Nucleus,Phosphoprotein,Polymorphism,Proteomics identification,Reference proteome,Repeat,Repressor,S-adenosyl-L-methionine,Transcription,Transcription regulation,Transferase,Ubl conjugation,Zinc,Zi…
POLD2	DNA polymerase delta 2, accessory subunit(POLD2)	GO:0003677~DNA binding,GO:0003887~DNA-directed DNA polymerase activity,GO:0005515~protein binding,		3D-structure,Acetylation,Complete proteome,DNA replication,DNA-directed DNA polymerase,Nucleotidyltransferase,Nucleus,Phosphoprotein,Polymorphism,Proteomics identification,Reference proteome,Transferase,
DNAJB11	DnaJ heat shock protein family (Hsp40) member B11(DNAJB11)	GO:0005515~protein binding,GO:0051082~unfolded protein binding,	SM00271:DnaJ,	Chaperone,Complete proteome,Disulfide bond,Endoplasmic reticulum,Glycoprotein,Phosphoprotein,Polymorphism,Reference proteome,Signal,
DNAJC2	DnaJ heat shock protein family (Hsp40) member C2(DNAJC2)	GO:0001671~ATPase activator activity,GO:0003677~DNA binding,GO:0003682~chromatin binding,GO:0030544~Hsp70 protein binding,GO:0042393~histone binding,GO:0043130~ubiquitin binding,GO:0044822~poly(A) RNA binding,	SM00271:DnaJ,SM00717:SANT,	3D-structure,Acetylation,Activator,Alternative splicing,Chaperone,Chromatin regulator,Coiled coil,Complete proteome,Cytoplasm,Direct protein sequencing,Nucleus,Phosphoprotein,Proteomics identification,Reference proteome,Repeat,Transcription,Transcription regulation,
EBNA1BP2	EBNA1 binding protein 2(EBNA1BP2)	GO:0044822~poly(A) RNA binding,		Acetylation,Coiled coil,Complete proteome,Nucleus,Phosphoprotein,Polymorphism,Proteomics identification,Reference proteome,Ribosome biogenesis,
EHD4	EH domain containing 4(EHD4)	GO:0003676~nucleic acid binding,GO:0005509~calcium ion binding,GO:0005515~protein binding,GO:0005524~ATP binding,GO:0005525~GTP binding,GO:0098641~cadherin binding involved in cell-cell adhesion,	SM00027:EH,	Acetylation,ATP-binding,Calcium,Cell membrane,Complete proteome,Endosome,Membrane,Metal-binding,Nucleotide-binding,Phosphoprotein,Polymorphism,Reference proteome,
ELAVL1	ELAV like RNA binding protein 1(ELAVL1)	GO:0000166~nucleotide binding,GO:0003723~RNA binding,GO:0003725~double-stranded RNA binding,GO:0003729~mRNA binding,GO:0003730~mRNA 3'-UTR binding,GO:0005515~protein binding,GO:0017091~AU-rich element binding,GO:0019901~protein kinase binding,GO:0035925~mRNA 3'-UTR AU-rich region binding,GO:0042803~protein homodimerization activity,GO:0044822~poly(A) RNA binding,	SM00360:RRM,	3D-structure,Acetylation,Alternative splicing,Complete proteome,Cytoplasm,Methylation,Nucleus,Phosphoprotein,Proteomics identification,Reference proteome,Repeat,RNA-binding,
EWSR1	EWS RNA binding protein 1(EWSR1)	GO:0000166~nucleotide binding,GO:0003723~RNA binding,GO:0005515~protein binding,GO:0005516~calmodulin binding,GO:0008270~zinc ion binding,GO:0042802~identical protein binding,GO:0044822~poly(A) RNA binding,	SM00360:RRM,SM00547:ZnF_RBZ,	3D-structure,Acetylation,Alternative splicing,Calmodulin-binding,Cell membrane,Chromosomal rearrangement,Complete proteome,Cytoplasm,Direct protein sequencing,Membrane,Metal-binding,Methylation,Nucleus,Phosphoprotein,Proteomics identification,Proto-oncogene,Reference proteome,Repeat,Repressor,RNA-binding,Transcription,Transcription regulation,Zinc,Zinc-finger,
FXR2	FMR1 autosomal homolog 2(FXR2)	GO:0003723~RNA binding,GO:0003729~mRNA binding,GO:0005515~protein binding,GO:0042802~identical protein binding,GO:0042803~protein homodimerization activity,GO:0044822~poly(A) RNA binding,GO:0046982~protein heterodimerization activity,	SM00322:KH,	3D-structure,Complete proteome,Cytoplasm,Phosphoprotein,Polymorphism,Proteomics identification,Reference proteome,Repeat,RNA-binding,
FUS	FUS RNA binding protein(FUS)	GO:0000166~nucleotide binding,GO:0003676~nucleic acid binding,GO:0003677~DNA binding,GO:0003713~transcription coactivator activity,GO:0003723~RNA binding,GO:0005515~protein binding,GO:0008270~zinc ion binding,GO:0030331~estrogen receptor binding,GO:0031489~myosin V binding,GO:0035255~ionotropic glutamate receptor binding,GO:0042802~identical protein binding,GO:0044822~poly(A) RNA binding,GO:00469…	SM00360:RRM,SM00547:ZnF_RBZ,	3D-structure,Alternative splicing,Amyotrophic lateral sclerosis,Chromosomal rearrangement,Complete proteome,Direct protein sequencing,Disease mutation,DNA-binding,Metal-binding,Methylation,Neurodegeneration,Nucleus,Phosphoprotein,Polymorphism,Proteomics identification,Proto-oncogene,Reference proteome,Repeat,RNA-binding,Zinc,Zinc-finger,
GNL3L	G protein nucleolar 3 like(GNL3L)	GO:0003924~GTPase activity,GO:0005515~protein binding,GO:0005525~GTP binding,GO:0044822~poly(A) RNA binding,		Coiled coil,Complete proteome,GTP-binding,Isopeptide bond,Nucleotide-binding,Nucleus,Polymorphism,Reference proteome,Ribosome biogenesis,Ubl conjugation,
G3BP1	G3BP stress granule assembly factor 1(G3BP1)	GO:0000166~nucleotide binding,GO:0003676~nucleic acid binding,GO:0003677~DNA binding,GO:0003729~mRNA binding,GO:0004003~ATP-dependent DNA helicase activity,GO:0004004~ATP-dependent RNA helicase activity,GO:0004519~endonuclease activity,GO:0005515~protein binding,GO:0005524~ATP binding,GO:0044822~poly(A) RNA binding,	SM00360:RRM,	3D-structure,Acetylation,Alternative splicing,ATP-binding,Cell membrane,Complete proteome,Cytoplasm,Direct protein sequencing,DNA-binding,Endonuclease,Helicase,Hydrolase,Membrane,Methylation,Nuclease,Nucleotide-binding,Nucleus,Phosphoprotein,Proteomics identification,Reference proteome,RNA-binding,Transport,
GADD45GIP1	GADD45G interacting protein 1(GADD45GIP1)	GO:0005515~protein binding,		3D-structure,Cell cycle,Coiled coil,Complete proteome,Host-virus interaction,Mitochondrion,Nucleus,Reference proteome,
HTATIP2	HIV-1 Tat interactive protein 2(HTATIP2)	GO:0003713~transcription coactivator activity,GO:0005515~protein binding,GO:0016491~oxidoreductase activity,		3D-structure,Acetylation,Alternative splicing,Angiogenesis,Apoptosis,Complete proteome,Cytoplasm,Developmental protein,Differentiation,Host-virus interaction,NADP,Nucleus,Oxidoreductase,Polymorphism,Proteomics identification,Reference proteome,Tumor suppressor,
KLF16	Kruppel like factor 16(KLF16)	GO:0000978~RNA polymerase II core promoter proximal region sequence-specific DNA binding,GO:0001078~transcriptional repressor activity, RNA polymerase II core promoter proximal region sequence-specific binding,GO:0003676~nucleic acid binding,GO:0046872~metal ion binding,	SM00355:ZnF_C2H2,	Complete proteome,DNA-binding,Metal-binding,Nucleus,Phosphoprotein,Proteomics identification,Reference proteome,Repeat,Transcription,Transcription regulation,Zinc,Zinc-finger,
LMO7	LIM domain 7(LMO7)	GO:0004842~ubiquitin-protein transferase activity,GO:0008270~zinc ion binding,	SM00033:CH,SM00132:LIM,SM00228:PDZ,	3D-structure,Acetylation,Alternative splicing,Coiled coil,Complete proteome,LIM domain,Membrane,Metal-binding,Phosphoprotein,Polymorphism,Proteomics identification,Reference proteome,Transmembrane,Transmembrane helix,Zinc,
LARP7	La ribonucleoprotein domain family member 7(LARP7)	GO:0000166~nucleotide binding,GO:0003723~RNA binding,GO:0005515~protein binding,GO:0044822~poly(A) RNA binding,	SM00360:RRM,SM00715:LA,	3D-structure,Acetylation,Alternative splicing,Complete proteome,Dwarfism,Mental retardation,Nucleus,Phosphoprotein,Proteomics identification,Reference proteome,RNA-binding,
LYAR	Ly1 antibody reactive(LYAR)	GO:0005515~protein binding,GO:0044822~poly(A) RNA binding,GO:0046872~metal ion binding,		Coiled coil,Complete proteome,Isopeptide bond,Metal-binding,Nucleus,Phosphoprotein,Polymorphism,Proteomics identification,Reference proteome,Repeat,Ubl conjugation,Zinc,Zinc-finger,
MAFK	MAF bZIP transcription factor K(MAFK)	GO:0000976~transcription regulatory region sequence-specific DNA binding,GO:0001221~transcription cofactor binding,GO:0001228~transcriptional activator activity, RNA polymerase II transcription regulatory region sequence-specific binding,GO:0003700~transcription factor activity, sequence-specific DNA binding,GO:0005515~protein binding,GO:0005525~GTP binding,GO:0043565~sequence-specific DNA bindin…	SM00338:BRLZ,	Coiled coil,Complete proteome,DNA-binding,GTP-binding,Nucleotide-binding,Nucleus,Phosphoprotein,Reference proteome,Repressor,Transcription,Transcription regulation,
MYBBP1A	MYB binding protein 1a(MYBBP1A)	GO:0001047~core promoter binding,GO:0003677~DNA binding,GO:0003714~transcription corepressor activity,GO:0003887~DNA-directed DNA polymerase activity,GO:0005515~protein binding,GO:0008134~transcription factor binding,GO:0043565~sequence-specific DNA binding,GO:0044822~poly(A) RNA binding,		Acetylation,Activator,Alternative splicing,Biological rhythms,Citrullination,Complete proteome,Cytoplasm,Nucleus,Phosphoprotein,Polymorphism,Proteomics identification,Reference proteome,Repressor,Signal,Transcription,Transcription regulation,
MYCBP2	MYC binding protein 2, E3 ubiquitin protein ligase(MYCBP2)	GO:0005515~protein binding,GO:0008270~zinc ion binding,GO:0016874~ligase activity,	SM00184:RING,SM01337:SM01337,	Alternative splicing,Complete proteome,Disulfide bond,Ligase,Metal-binding,Nucleus,Phosphoprotein,Polymorphism,Proteomics identification,Reference proteome,Repeat,Transcription,Transcription regulation,Ubl conjugation,Ubl conjugation pathway,Zinc,Zinc-finger,
NIP7	NIP7, nucleolar pre-rRNA processing protein(NIP7)	GO:0003723~RNA binding,GO:0005515~protein binding,GO:0044822~poly(A) RNA binding,	SM00359:PUA,	3D-structure,Alternative splicing,Complete proteome,Nucleus,Polymorphism,Proteomics identification,Reference proteome,Ribosome biogenesis,RNA-binding,
NOP16	NOP16 nucleolar protein(NOP16)	GO:0044822~poly(A) RNA binding,		Acetylation,Alternative splicing,Complete proteome,Nucleus,Phosphoprotein,Proteomics identification,Reference proteome,
NSUN5	NOP2/Sun RNA methyltransferase family member 5(NSUN5)	GO:0008173~RNA methyltransferase activity,GO:0008757~S-adenosylmethionine-dependent methyltransferase activity,GO:0044822~poly(A) RNA binding,		3D-structure,Acetylation,Alternative splicing,Complete proteome,Direct protein sequencing,Methyltransferase,Phosphoprotein,Polymorphism,Reference proteome,RNA-binding,rRNA processing,S-adenosyl-L-methionine,Transferase,Williams-Beuren syndrome,
NSMCE2	NSE2/MMS21 homolog, SMC5-SMC6 complex SUMO ligase(NSMCE2)	GO:0005515~protein binding,GO:0008270~zinc ion binding,GO:0016874~ligase activity,GO:0019789~SUMO transferase activity,		3D-structure,Acetylation,Cell cycle,Cell division,Chromosome,Complete proteome,DNA damage,DNA recombination,DNA repair,Ligase,Metal-binding,Mitosis,Nucleus,Phosphoprotein,Polymorphism,Proteomics identification,Reference proteome,Telomere,Ubl conjugation,Ubl conjugation pathway,Zinc,Zinc-finger,
MGMT	O-6-methylguanine-DNA methyltransferase(MGMT)	GO:0003677~DNA binding,GO:0003684~damaged DNA binding,GO:0003908~methylated-DNA-[protein]-cysteine S-methyltransferase activity,GO:0005509~calcium ion binding,GO:0008168~methyltransferase activity,GO:0009008~DNA-methyltransferase activity,		3D-structure,Complete proteome,Direct protein sequencing,DNA damage,DNA repair,DNA-binding,Metal-binding,Methyltransferase,Nucleus,Phosphoprotein,Polymorphism,Reference proteome,Transferase,Zinc,
PSIP1	PC4 and SFRS1 interacting protein 1(PSIP1)	GO:0001105~RNA polymerase II transcription coactivator activity,GO:0003682~chromatin binding,GO:0005515~protein binding,GO:0033613~activating transcription factor binding,GO:0044822~poly(A) RNA binding,GO:0097100~supercoiled DNA binding,	SM00293:PWWP,	3D-structure,Alternative splicing,Chromosomal rearrangement,Citrullination,Coiled coil,Complete proteome,Direct protein sequencing,DNA-binding,Host-virus interaction,Nucleus,Phosphoprotein,Proteomics identification,Reference proteome,Transcription,Transcription regulation,
PDS5B	PDS5 cohesin associated factor B(PDS5B)	GO:0003677~DNA binding,GO:0005515~protein binding,GO:0005524~ATP binding,		3D-structure,Acetylation,Alternative splicing,Cell cycle,Cell division,Complete proteome,Mitosis,Nucleus,Phosphoprotein,Proteomics identification,Reference proteome,Repeat,
PHF10	PHD finger protein 10(PHF10)	GO:0008270~zinc ion binding,	SM00249:PHD,	Acetylation,Alternative splicing,Complete proteome,Isopeptide bond,Metal-binding,Neurogenesis,Nucleus,Phosphoprotein,Proteomics identification,Reference proteome,Repeat,Transcription,Transcription regulation,Ubl conjugation,Zinc,Zinc-finger,
PHF14	PHD finger protein 14(PHF14)	GO:0008270~zinc ion binding,	SM00249:PHD,	Alternative initiation,Alternative splicing,Coiled coil,Complete proteome,Metal-binding,Phosphoprotein,Polymorphism,Proteomics identification,Reference proteome,Repeat,Zinc,Zinc-finger,
PHF6	PHD finger protein 6(PHF6)	GO:0003677~DNA binding,GO:0005515~protein binding,GO:0008270~zinc ion binding,GO:0015631~tubulin binding,GO:0019899~enzyme binding,GO:0042393~histone binding,GO:0042826~histone deacetylase binding,GO:0043021~ribonucleoprotein complex binding,GO:0044822~poly(A) RNA binding,GO:0051219~phosphoprotein binding,GO:0097110~scaffold protein binding,	SM00249:PHD,	3D-structure,Acetylation,Alternative splicing,Centromere,Chromosome,Complete proteome,Disease mutation,DNA-binding,Epilepsy,Isopeptide bond,Kinetochore,Mental retardation,Metal-binding,Nucleus,Phosphoprotein,Proteomics identification,Reference proteome,Repeat,Transcription,Transcription regulation,Ubl conjugation,Zinc,Zinc-finger,
PHF8	PHD finger protein 8(PHF8)	GO:0003682~chromatin binding,GO:0005506~iron ion binding,GO:0005515~protein binding,GO:0008270~zinc ion binding,GO:0016706~oxidoreductase activity, acting on paired donors, with incorporation or reduction of molecular oxygen, 2-oxoglutarate as one donor, and incorporation of one atom each of oxygen into both donors,GO:0032452~histone demethylase activity,GO:0032454~histone demethylase activity (H…	SM00249:PHD,SM00558:JmjC,	3D-structure,Activator,Alternative splicing,Cell cycle,Chromatin regulator,Complete proteome,Dioxygenase,Disease mutation,Iron,Mental retardation,Metal-binding,Nucleus,Oxidoreductase,Phosphoprotein,Proteomics identification,Reference proteome,Transcription,Transcription regulation,Zinc,Zinc-finger,
POU2F1	POU class 2 homeobox 1(POU2F1)	GO:0003700~transcription factor activity, sequence-specific DNA binding,GO:0005515~protein binding,GO:0043565~sequence-specific DNA binding,	SM00352:POU,SM00389:HOX,	3D-structure,Activator,Alternative splicing,Complete proteome,DNA-binding,Homeobox,Nucleus,Phosphoprotein,Polymorphism,Proteomics identification,Reference proteome,Transcription,Transcription regulation,
RAD54B	RAD54 homolog B (S. cerevisiae)(RAD54B)	GO:0003677~DNA binding,GO:0003678~DNA helicase activity,GO:0003724~RNA helicase activity,GO:0005515~protein binding,GO:0005524~ATP binding,GO:0015616~DNA translocase activity,	SM00487:DEXDc,SM00490:HELICc,	Alternative splicing,ATP-binding,Complete proteome,DNA damage,DNA repair,DNA-binding,Helicase,Hydrolase,Nucleotide-binding,Nucleus,Phosphoprotein,Polymorphism,Proteomics identification,Reference proteome,Repressor,Transcription,Transcription regulation,
RALY	RALY heterogeneous nuclear ribonucleoprotein(RALY)	GO:0000166~nucleotide binding,GO:0003676~nucleic acid binding,GO:0003712~transcription cofactor activity,GO:0003723~RNA binding,GO:0005515~protein binding,GO:0044822~poly(A) RNA binding,	SM00360:RRM,	3D-structure,Acetylation,Alternative splicing,Coiled coil,Complete proteome,Direct protein sequencing,Isopeptide bond,mRNA processing,mRNA splicing,Nucleus,Phosphoprotein,Polymorphism,Proteomics identification,Reference proteome,Ribonucleoprotein,RNA-binding,Signal,Spliceosome,Transcription,Transcription regulation,Ubl conjugation,
RBBP7	RB binding protein 7, chromatin remodeling factor(RBBP7)	GO:0003723~RNA binding,GO:0004407~histone deacetylase activity,GO:0005515~protein binding,	SM00320:WD40,	3D-structure,Acetylation,Alternative splicing,Chaperone,Chromatin regulator,Complete proteome,Direct protein sequencing,DNA replication,Isopeptide bond,Nucleus,Phosphoprotein,Proteomics identification,Reference proteome,Repeat,Repressor,Transcription,Transcription regulation,Ubl conjugation,WD repeat,
REXO4	REX4 homolog, 3'-5' exonuclease(REXO4)	GO:0003676~nucleic acid binding,GO:0003700~transcription factor activity, sequence-specific DNA binding,GO:0004527~exonuclease activity,GO:0044822~poly(A) RNA binding,	SM00479:EXOIII,	Alternative splicing,Complete proteome,Exonuclease,Hydrolase,Nuclease,Nucleus,Phosphoprotein,Polymorphism,Proteomics identification,Reference proteome,
RTCB	RNA 2',3'-cyclic phosphate and 5'-OH ligase(RTCB)	GO:0003972~RNA ligase (ATP) activity,GO:0005515~protein binding,GO:0005524~ATP binding,GO:0017166~vinculin binding,GO:0044822~poly(A) RNA binding,GO:0046872~metal ion binding,		ATP-binding,Complete proteome,Cytoplasm,Direct protein sequencing,Ligase,Manganese,Metal-binding,Nucleotide-binding,Nucleus,Phosphoprotein,Polymorphism,Reference proteome,tRNA processing,
RBM14	RNA binding motif protein 14(RBM14)	GO:0000166~nucleotide binding,GO:0001104~RNA polymerase II transcription cofactor activity,GO:0003676~nucleic acid binding,GO:0003723~RNA binding,GO:0005515~protein binding,GO:0030374~ligand-dependent nuclear receptor transcription coactivator activity,GO:0030674~protein binding, bridging,GO:0044822~poly(A) RNA binding,	SM00360:RRM,	3D-structure,Acetylation,Alternative splicing,Complete proteome,Cytoplasm,Isopeptide bond,Nucleus,Phosphoprotein,Reference proteome,Repeat,Repressor,RNA-binding,Transcription,Transcription regulation,Ubl conjugation,
RBM19	RNA binding motif protein 19(RBM19)	GO:0000166~nucleotide binding,GO:0003676~nucleic acid binding,GO:0044822~poly(A) RNA binding,	SM00360:RRM,SM00361:RRM_1,	3D-structure,Chromosome,Coiled coil,Complete proteome,Cytoplasm,Developmental protein,Nucleus,Phosphoprotein,Polymorphism,Proteomics identification,Reference proteome,Repeat,RNA-binding,
RBM34	RNA binding motif protein 34(RBM34)	GO:0000166~nucleotide binding,GO:0003676~nucleic acid binding,GO:0044822~poly(A) RNA binding,	SM00360:RRM,	Acetylation,Alternative splicing,Complete proteome,Nucleus,Phosphoprotein,Proteomics identification,Reference proteome,Repeat,RNA-binding,
RBM39	RNA binding motif protein 39(RBM39)	GO:0000166~nucleotide binding,GO:0003676~nucleic acid binding,GO:0003723~RNA binding,GO:0005515~protein binding,GO:0044822~poly(A) RNA binding,	SM00360:RRM,SM00361:RRM_1,	3D-structure,Acetylation,Activator,Alternative splicing,Complete proteome,Direct protein sequencing,mRNA processing,mRNA splicing,Nucleus,Phosphoprotein,Polymorphism,Proteomics identification,Reference proteome,Repeat,RNA-binding,Transcription,Transcription regulation,
RBM7	RNA binding motif protein 7(RBM7)	GO:0000166~nucleotide binding,GO:0003676~nucleic acid binding,GO:0003727~single-stranded RNA binding,GO:0044822~poly(A) RNA binding,	SM00360:RRM,	3D-structure,Complete proteome,Meiosis,Methylation,Phosphoprotein,Proteomics identification,Reference proteome,RNA-binding,
RBMX	RNA binding motif protein, X-linked(RBMX)	GO:0000166~nucleotide binding,GO:0001047~core promoter binding,GO:0003676~nucleic acid binding,GO:0003682~chromatin binding,GO:0003723~RNA binding,GO:0003727~single-stranded RNA binding,GO:0003729~mRNA binding,GO:0005515~protein binding,GO:0042802~identical protein binding,GO:0044822~poly(A) RNA binding,	SM00360:RRM,SM00361:RRM_1,	3D-structure,Acetylation,Activator,Alternative splicing,Complete proteome,Direct protein sequencing,Glycoprotein,Isopeptide bond,Mental retardation,Methylation,mRNA processing,mRNA splicing,Nucleus,Phosphoprotein,Proteomics identification,Reference proteome,Repressor,Ribonucleoprotein,RNA-binding,Spliceosome,Transcription,Tumor suppressor,Ubl conjugation,
RNMT	RNA guanine-7 methyltransferase(RNMT)	GO:0003723~RNA binding,GO:0004482~mRNA (guanine-N7-)-methyltransferase activity,GO:0005515~protein binding,		3D-structure,Alternative splicing,Complete proteome,Methyltransferase,mRNA capping,mRNA processing,Nucleus,Phosphoprotein,Proteomics identification,Reference proteome,RNA-binding,S-adenosyl-L-methionine,Transferase,
RNGTT	RNA guanylyltransferase and 5'-phosphatase(RNGTT)	GO:0004484~mRNA guanylyltransferase activity,GO:0004651~polynucleotide 5'-phosphatase activity,GO:0004725~protein tyrosine phosphatase activity,GO:0005525~GTP binding,GO:0008138~protein tyrosine/serine/threonine phosphatase activity,GO:0008192~RNA guanylyltransferase activity,GO:0050355~triphosphatase activity,		3D-structure,Alternative splicing,Complete proteome,GTP-binding,Host-virus interaction,Hydrolase,mRNA capping,mRNA processing,Multifunctional enzyme,Nucleotide-binding,Nucleotidyltransferase,Nucleus,Polymorphism,Reference proteome,Transferase,
POLR1E	RNA polymerase I subunit E(POLR1E)	GO:0001054~RNA polymerase I activity,GO:0001179~RNA polymerase I transcription factor binding,GO:0003677~DNA binding,GO:0003899~DNA-directed RNA polymerase activity,		Alternative splicing,Complete proteome,DNA-directed RNA polymerase,Nucleus,Phosphoprotein,Polymorphism,Proteomics identification,Reference proteome,Transcription,
RECQL	RecQ like helicase(RECQL)	GO:0003676~nucleic acid binding,GO:0003677~DNA binding,GO:0003678~DNA helicase activity,GO:0004003~ATP-dependent DNA helicase activity,GO:0005515~protein binding,GO:0005524~ATP binding,GO:0008026~ATP-dependent helicase activity,GO:0009378~four-way junction helicase activity,GO:0036310~annealing helicase activity,GO:0043140~ATP-dependent 3'-5' DNA helicase activity,	SM00487:DEXDc,SM00490:HELICc,	3D-structure,Acetylation,ATP-binding,Coiled coil,Complete proteome,Direct protein sequencing,DNA-binding,Helicase,Hydrolase,Nucleotide-binding,Nucleus,Phosphoprotein,Polymorphism,Proteomics identification,Reference proteome,
ARHGDIA	Rho GDP dissociation inhibitor alpha(ARHGDIA)	GO:0005094~Rho GDP-dissociation inhibitor activity,GO:0005096~GTPase activator activity,GO:0005504~fatty acid binding,GO:0005515~protein binding,		3D-structure,Acetylation,Alternative splicing,Complete proteome,Cytoplasm,Direct protein sequencing,Disease mutation,GTPase activation,Isopeptide bond,Phosphoprotein,Proteomics identification,Reference proteome,Ubl conjugation,
RUVBL1	RuvB like AAA ATPase 1(RUVBL1)	GO:0003678~DNA helicase activity,GO:0005515~protein binding,GO:0005524~ATP binding,GO:0016887~ATPase activity,GO:0043141~ATP-dependent 5'-3' DNA helicase activity,GO:0098641~cadherin binding involved in cell-cell adhesion,	SM00382:AAA,	3D-structure,Acetylation,Activator,Alternative splicing,ATP-binding,Cell cycle,Cell division,Chromatin regulator,Complete proteome,Cytoplasm,Cytoskeleton,Direct protein sequencing,DNA damage,DNA recombination,DNA repair,Growth regulation,Helicase,Hydrolase,Isopeptide bond,Membrane,Mitosis,Nucleotide-binding,Nucleus,Proteomics identification,Reference proteome,Transcription,Transcription regulatio…
RUVBL2	RuvB like AAA ATPase 2(RUVBL2)	GO:0000979~RNA polymerase II core promoter sequence-specific DNA binding,GO:0000980~RNA polymerase II distal enhancer sequence-specific DNA binding,GO:0003678~DNA helicase activity,GO:0004003~ATP-dependent DNA helicase activity,GO:0005515~protein binding,GO:0005524~ATP binding,GO:0016887~ATPase activity,GO:0031490~chromatin DNA binding,GO:0042802~identical protein binding,GO:0043141~ATP-dependent…	SM00382:AAA,	3D-structure,Acetylation,Activator,Alternative splicing,ATP-binding,Chromatin regulator,Complete proteome,Cytoplasm,Direct protein sequencing,DNA damage,DNA recombination,DNA repair,Growth regulation,Helicase,Hydrolase,Membrane,Nucleotide-binding,Nucleus,Phosphoprotein,Proteomics identification,Reference proteome,Transcription,Transcription regulation,
SARNP	SAP domain containing ribonucleoprotein(SARNP)	GO:0003677~DNA binding,GO:0005515~protein binding,GO:0044822~poly(A) RNA binding,	SM00513:SAP,	3D-structure,Acetylation,Complete proteome,Direct protein sequencing,DNA-binding,mRNA transport,Nucleus,Phosphoprotein,Proteomics identification,Reference proteome,RNA-binding,Transcription,Transcription regulation,Translation regulation,Transport,
SERBP1	SERPINE1 mRNA binding protein 1(SERBP1)	GO:0003730~mRNA 3'-UTR binding,GO:0005515~protein binding,GO:0044822~poly(A) RNA binding,GO:0098641~cadherin binding involved in cell-cell adhesion,	SM01233:SM01233,	3D-structure,Acetylation,Alternative splicing,Complete proteome,Cytoplasm,Direct protein sequencing,Isopeptide bond,Methylation,Nucleus,Phosphoprotein,Reference proteome,RNA-binding,Ubl conjugation,
SBF1	SET binding factor 1(SBF1)	GO:0008138~protein tyrosine/serine/threonine phosphatase activity,GO:0017112~Rab guanyl-nucleotide exchange factor activity,GO:0019208~phosphatase regulator activity,	SM00233:PH,SM00568:GRAM,SM00799:DENN,SM00800:uDENN,SM00801:dDENN,	Alternative splicing,Charcot-Marie-Tooth disease,Complete proteome,Disease mutation,Guanine-nucleotide releasing factor,Methylation,Neurodegeneration,Neuropathy,Nucleus,Phosphoprotein,Proteomics identification,Reference proteome,
SLC9A3R2	SLC9A3 regulator 2(SLC9A3R2)	GO:0005102~receptor binding,GO:0005515~protein binding,GO:0008013~beta-catenin binding,GO:0008022~protein C-terminus binding,GO:0019902~phosphatase binding,GO:0032947~protein complex scaffold,GO:0098641~cadherin binding involved in cell-cell adhesion,	SM00228:PDZ,	3D-structure,Alternative splicing,Cell membrane,Complete proteome,Membrane,Nucleus,Phosphoprotein,Proteomics identification,Reference proteome,Repeat,
SNW1	SNW domain containing 1(SNW1)	GO:0003713~transcription coactivator activity,GO:0003714~transcription corepressor activity,GO:0005112~Notch binding,GO:0005515~protein binding,GO:0035257~nuclear hormone receptor binding,GO:0042809~vitamin D receptor binding,GO:0042974~retinoic acid receptor binding,GO:0044822~poly(A) RNA binding,GO:0046332~SMAD binding,		Acetylation,Coiled coil,Complete proteome,Direct protein sequencing,Host-virus interaction,Isopeptide bond,mRNA processing,mRNA splicing,Nucleus,Phosphoprotein,Proteomics identification,Reference proteome,Spliceosome,Transcription,Transcription regulation,Ubl conjugation,
SUPT16H	SPT16 homolog, facilitates chromatin remodeling subunit(SUPT16H)	GO:0005515~protein binding,GO:0031491~nucleosome binding,GO:0042393~histone binding,GO:0044822~poly(A) RNA binding,	SM01285:SM01285,SM01286:SM01286,SM01287:SM01287,	3D-structure,Acetylation,ADP-ribosylation,Chromosome,Coiled coil,Complete proteome,Direct protein sequencing,DNA damage,DNA repair,DNA replication,Isopeptide bond,Nucleus,Phosphoprotein,Proteomics identification,Reference proteome,Transcription,Transcription regulation,Ubl conjugation,
SLIRP	SRA stem-loop interacting RNA binding protein(SLIRP)	GO:0000166~nucleotide binding,GO:0003676~nucleic acid binding,GO:0005515~protein binding,GO:0044822~poly(A) RNA binding,	SM00360:RRM,	Alternative splicing,Complete proteome,Mitochondrion,Nucleus,Phosphoprotein,Proteomics identification,Reference proteome,Repressor,RNA-binding,Transcription,Transcription regulation,Transit peptide,
SUB1	SUB1 homolog, transcriptional regulator(SUB1)	GO:0001205~transcriptional activator activity, RNA polymerase II distal enhancer sequence-specific binding,GO:0003677~DNA binding,GO:0003697~single-stranded DNA binding,GO:0003713~transcription coactivator activity,GO:0005515~protein binding,GO:0044822~poly(A) RNA binding,		3D-structure,Acetylation,Activator,Complete proteome,Direct protein sequencing,DNA-binding,Isopeptide bond,Nucleus,Phosphoprotein,Polymorphism,Proteomics identification,Reference proteome,Transcription,Transcription regulation,Ubl conjugation,
SWAP70	SWAP switching B-cell complex 70kDa subunit(SWAP70)	GO:0003677~DNA binding,GO:0005509~calcium ion binding,GO:0005515~protein binding,GO:0005524~ATP binding,GO:0098641~cadherin binding involved in cell-cell adhesion,	SM00233:PH,	3D-structure,Cell membrane,Cell projection,Coiled coil,Complete proteome,Cytoplasm,Cytoskeleton,DNA-binding,Membrane,Nucleus,Phosphoprotein,Polymorphism,Proteomics identification,Reference proteome,
SMARCA5	SWI/SNF related, matrix associated, actin dependent regulator of chromatin, subfamily a, member 5(SMARCA5)	GO:0003677~DNA binding,GO:0004386~helicase activity,GO:0005515~protein binding,GO:0005524~ATP binding,GO:0016887~ATPase activity,GO:0031491~nucleosome binding,GO:0042393~histone binding,	SM00487:DEXDc,SM00490:HELICc,SM00717:SANT,	Acetylation,ATP-binding,Chromatin regulator,Complete proteome,Helicase,Hydrolase,Nucleotide-binding,Nucleus,Phosphoprotein,Reference proteome,Repeat,
SSB	Sjogren syndrome antigen B(SSB)	GO:0000049~tRNA binding,GO:0000166~nucleotide binding,GO:0003723~RNA binding,GO:0003729~mRNA binding,GO:0005515~protein binding,GO:0044822~poly(A) RNA binding,	SM00360:RRM,SM00715:LA,	3D-structure,Acetylation,Coiled coil,Complete proteome,Nucleus,Phosphoprotein,Polymorphism,Proteomics identification,Reference proteome,RNA-binding,Systemic lupus erythematosus,
TARDBP	TAR DNA binding protein(TARDBP)	GO:0000166~nucleotide binding,GO:0001205~transcriptional activator activity, RNA polymerase II distal enhancer sequence-specific binding,GO:0003676~nucleic acid binding,GO:0003690~double-stranded DNA binding,GO:0003700~transcription factor activity, sequence-specific DNA binding,GO:0003723~RNA binding,GO:0003730~mRNA 3'-UTR binding,GO:0005515~protein binding,GO:0042802~identical protein binding,G…	SM00360:RRM,	3D-structure,Alternative splicing,Amyotrophic lateral sclerosis,Complete proteome,Direct protein sequencing,Disease mutation,DNA-binding,Isopeptide bond,Methylation,mRNA processing,mRNA splicing,Neurodegeneration,Nucleus,Phosphoprotein,Polymorphism,Proteomics identification,Reference proteome,Repeat,Repressor,RNA-binding,Transcription,Transcription regulation,Ubl conjugation,
TAF3	TATA-box binding protein associated factor 3(TAF3)	GO:0002039~p53 binding,GO:0005515~protein binding,GO:0008270~zinc ion binding,	SM00249:PHD,SM00576:BTP,	3D-structure,Acetylation,Complete proteome,Isopeptide bond,Metal-binding,Nucleus,Phosphoprotein,Polymorphism,Reference proteome,Transcription,Transcription regulation,Ubl conjugation,Zinc,Zinc-finger,
THOC1	THO complex 1(THOC1)	GO:0003677~DNA binding,GO:0003723~RNA binding,GO:0005515~protein binding,	SM00005:DEATH,	3D-structure,Acetylation,Alternative splicing,Apoptosis,Complete proteome,Cytoplasm,DNA-binding,Isopeptide bond,mRNA processing,mRNA splicing,mRNA transport,Nucleus,Phosphoprotein,Proteomics identification,Reference proteome,RNA-binding,Transcription,Transcription regulation,Transport,Ubl conjugation,
THOC5	THO complex 5(THOC5)	GO:0003729~mRNA binding,GO:0005515~protein binding,		Acetylation,Complete proteome,Cytoplasm,Differentiation,mRNA processing,mRNA splicing,mRNA transport,Nucleus,Phosphoprotein,Polymorphism,Proteomics identification,Reference proteome,RNA-binding,Transport,
TSR1	TSR1, ribosome maturation factor(TSR1)	GO:0003924~GTPase activity,GO:0005525~GTP binding,GO:0034511~U3 snoRNA binding,GO:0044822~poly(A) RNA binding,	SM00785:AARP2CN,SM01362:SM01362,	Complete proteome,Direct protein sequencing,Nucleus,Polymorphism,Proteomics identification,Reference proteome,Ribosome biogenesis,
U2AF2	U2 small nuclear RNA auxiliary factor 2(U2AF2)	GO:0000166~nucleotide binding,GO:0003723~RNA binding,GO:0005515~protein binding,GO:0008187~poly-pyrimidine tract binding,GO:0019899~enzyme binding,GO:0030628~pre-mRNA 3'-splice site binding,GO:0044822~poly(A) RNA binding,GO:0070742~C2H2 zinc finger domain binding,	SM00360:RRM,	3D-structure,Acetylation,Alternative splicing,Complete proteome,Direct protein sequencing,Hydroxylation,Isopeptide bond,mRNA processing,mRNA splicing,Nucleus,Phosphoprotein,Proteomics identification,Reference proteome,Repeat,Repressor,RNA-binding,Spliceosome,Ubl conjugation,
UPF1	UPF1, RNA helicase and ATPase(UPF1)	GO:0003677~DNA binding,GO:0003682~chromatin binding,GO:0003723~RNA binding,GO:0004004~ATP-dependent RNA helicase activity,GO:0004386~helicase activity,GO:0005515~protein binding,GO:0005524~ATP binding,GO:0008270~zinc ion binding,GO:0042162~telomeric DNA binding,GO:0044822~poly(A) RNA binding,		3D-structure,Alternative splicing,ATP-binding,Complete proteome,Cytoplasm,Helicase,Hydrolase,Metal-binding,Methylation,Nonsense-mediated mRNA decay,Nucleotide-binding,Nucleus,Phosphoprotein,Polymorphism,Reference proteome,Repeat,RNA-binding,Zinc,Zinc-finger,
UTP18	UTP18, small subunit processome component(UTP18)	GO:0044822~poly(A) RNA binding,	SM00320:WD40,	Complete proteome,Membrane,Nucleus,Phosphoprotein,Proteomics identification,Reference proteome,Repeat,rRNA processing,Transmembrane,Transmembrane helix,WD repeat,
XRCC1	X-ray repair cross complementing 1(XRCC1)	GO:0003684~damaged DNA binding,GO:0003909~DNA ligase activity,GO:0005515~protein binding,GO:0019899~enzyme binding,	SM00292:BRCT,	3D-structure,Complete proteome,DNA damage,DNA repair,Isopeptide bond,Nucleus,Phosphoprotein,Polymorphism,Proteomics identification,Reference proteome,Repeat,Ubl conjugation,
YBX3	Y-box binding protein 3(YBX3)	GO:0000977~RNA polymerase II regulatory region sequence-specific DNA binding,GO:0001227~transcriptional repressor activity, RNA polymerase II transcription regulatory region sequence-specific binding,GO:0003677~DNA binding,GO:0003690~double-stranded DNA binding,GO:0003697~single-stranded DNA binding,GO:0003700~transcription factor activity, sequence-specific DNA binding,GO:0003714~transcription c…	SM00357:CSP,	Acetylation,Alternative splicing,Complete proteome,Cytoplasm,DNA-binding,Methylation,Nucleus,Phosphoprotein,Polymorphism,Proteomics identification,Reference proteome,Repressor,Transcription,Transcription regulation,
ACACB	acetyl-CoA carboxylase beta(ACACB)	GO:0003989~acetyl-CoA carboxylase activity,GO:0004075~biotin carboxylase activity,GO:0005515~protein binding,GO:0005524~ATP binding,GO:0009374~biotin binding,GO:0046872~metal ion binding,	SM00878:SM00878,	3D-structure,Allosteric enzyme,Alternative splicing,ATP-binding,Biotin,Complete proteome,Fatty acid biosynthesis,Fatty acid metabolism,Ligase,Lipid biosynthesis,Lipid metabolism,Manganese,Membrane,Metal-binding,Mitochondrion,Multifunctional enzyme,Nucleotide-binding,Nucleus,Phosphoprotein,Polymorphism,Proteomics identification,Reference proteome,Transit peptide,
ANP32A	acidic nuclear phosphoprotein 32 family member A(ANP32A)	GO:0005515~protein binding,GO:0042393~histone binding,GO:0044822~poly(A) RNA binding,	SM00446:LRRcap,	3D-structure,Complete proteome,Cytoplasm,Direct protein sequencing,Endoplasmic reticulum,Leucine-rich repeat,Nucleus,Phosphoprotein,Proteomics identification,Reference proteome,Repeat,Repressor,Transcription,Transcription regulation,
ADRM1	adhesion regulating molecule 1(ADRM1)	GO:0002020~protease binding,GO:0005515~protein binding,GO:0043130~ubiquitin binding,GO:0061133~endopeptidase activator activity,GO:0070628~proteasome binding,		3D-structure,Acetylation,Complete proteome,Cytoplasm,Isopeptide bond,Nucleus,Phosphoprotein,Proteasome,Proteomics identification,Reference proteome,Ubl conjugation,
ALDOA	aldolase, fructose-bisphosphate A(ALDOA)	GO:0003779~actin binding,GO:0004332~fructose-bisphosphate aldolase activity,GO:0005515~protein binding,GO:0008092~cytoskeletal protein binding,GO:0015631~tubulin binding,GO:0042802~identical protein binding,GO:0044822~poly(A) RNA binding,GO:0070061~fructose binding,GO:0098641~cadherin binding involved in cell-cell adhesion,		3D-structure,Acetylation,Alternative splicing,Complete proteome,Cytoplasm,Direct protein sequencing,Disease mutation,Glycogen storage disease,Glycolysis,Hereditary hemolytic anemia,Isopeptide bond,Lyase,Membrane,Phosphoprotein,Polymorphism,Proteomics identification,Reference proteome,Schiff base,Transmembrane,Transmembrane helix,Ubl conjugation,
ALKBH5	alkB homolog 5, RNA demethylase(ALKBH5)	GO:0016706~oxidoreductase activity, acting on paired donors, with incorporation or reduction of molecular oxygen, 2-oxoglutarate as one donor, and incorporation of one atom each of oxygen into both donors,GO:0035515~oxidative RNA demethylase activity,GO:0044822~poly(A) RNA binding,GO:0046872~metal ion binding,		3D-structure,Acetylation,Alternative splicing,Coiled coil,Complete proteome,Differentiation,Dioxygenase,Iron,Metal-binding,Methylation,Nucleus,Oxidoreductase,Phosphoprotein,Proteomics identification,Reference proteome,Spermatogenesis,
API5	apoptosis inhibitor 5(API5)	GO:0005515~protein binding,GO:0017134~fibroblast growth factor binding,GO:0044822~poly(A) RNA binding,		3D-structure,Acetylation,Alternative splicing,Apoptosis,Complete proteome,Cytoplasm,Direct protein sequencing,Methylation,Nucleus,Phosphoprotein,Polymorphism,Proteomics identification,Reference proteome,Repeat,
APEX1	apurinic/apyrimidinic endodeoxyribonuclease 1(APEX1)	GO:0003677~DNA binding,GO:0003684~damaged DNA binding,GO:0003691~double-stranded telomeric DNA binding,GO:0003713~transcription coactivator activity,GO:0003714~transcription corepressor activity,GO:0003906~DNA-(apurinic or apyrimidinic site) lyase activity,GO:0004519~endonuclease activity,GO:0004520~endodeoxyribonuclease activity,GO:0004521~endoribonuclease activity,GO:0004523~RNA-DNA hybrid ribo…		3D-structure,Acetylation,Activator,Cleavage on pair of basic residues,Complete proteome,Cytoplasm,Direct protein sequencing,Disulfide bond,DNA damage,DNA recombination,DNA repair,DNA-binding,Endonuclease,Endoplasmic reticulum,Exonuclease,Hydrolase,Lyase,Magnesium,Metal-binding,Mitochondrion,Nuclease,Nucleus,Phosphoprotein,Polymorphism,Proteomics identification,Reference proteome,Repressor,RNA-bin…
ARRB2	arrestin beta 2(ARRB2)	GO:0001664~G-protein coupled receptor binding,GO:0005102~receptor binding,GO:0005515~protein binding,GO:0019899~enzyme binding,GO:0019904~protein domain specific binding,GO:0031625~ubiquitin protein ligase binding,GO:0031691~alpha-1A adrenergic receptor binding,GO:0031692~alpha-1B adrenergic receptor binding,GO:0031701~angiotensin receptor binding,GO:0031702~type 1 angiotensin receptor binding,GO…	SM01017:SM01017,	Alternative splicing,Cell membrane,Coated pit,Complete proteome,Cytoplasm,Cytoplasmic vesicle,Hydroxylation,Membrane,Nucleus,Phosphoprotein,Protein transport,Proteomics identification,Reference proteome,Signal transduction inhibitor,Transport,Ubl conjugation,
AURKB	aurora kinase B(AURKB)	GO:0004672~protein kinase activity,GO:0004674~protein serine/threonine kinase activity,GO:0004712~protein serine/threonine/tyrosine kinase activity,GO:0005515~protein binding,GO:0005524~ATP binding,GO:0035174~histone serine kinase activity,GO:0046872~metal ion binding,	SM00220:S_TKc,	3D-structure,Alternative splicing,ATP-binding,Cell cycle,Cell division,Centromere,Chromosome,Complete proteome,Cytoplasm,Cytoskeleton,Kinase,Magnesium,Metal-binding,Mitosis,Nucleotide-binding,Nucleus,Phosphoprotein,Polymorphism,Proteomics identification,Reference proteome,Serine/threonine-protein kinase,Transferase,Ubl conjugation,
BANF1	barrier to autointegration factor 1(BANF1)	GO:0003677~DNA binding,GO:0005515~protein binding,GO:0008022~protein C-terminus binding,GO:0019899~enzyme binding,GO:0042803~protein homodimerization activity,GO:0047485~protein N-terminus binding,	SM01023:SM01023,	3D-structure,Acetylation,Chromosome,Complete proteome,Cytoplasm,Disease mutation,DNA-binding,Host-virus interaction,Nucleus,Phosphoprotein,Proteomics identification,Reference proteome,
BCAS2	breast carcinoma amplified sequence 2(BCAS2)	GO:0005515~protein binding,		Acetylation,Coiled coil,Complete proteome,Direct protein sequencing,mRNA processing,mRNA splicing,Nucleus,Phosphoprotein,Polymorphism,Reference proteome,Spliceosome,
BAZ2A	bromodomain adjacent to zinc finger domain 2A(BAZ2A)	GO:0001164~RNA polymerase I CORE element sequence-specific DNA binding,GO:0003677~DNA binding,GO:0003723~RNA binding,GO:0005515~protein binding,GO:0008270~zinc ion binding,GO:0016922~ligand-dependent nuclear receptor binding,GO:0042393~histone binding,GO:0070577~lysine-acetylated histone binding,	SM00249:PHD,SM00297:BROMO,SM00384:AT_hook,SM00391:MBD,SM00571:DDT,	3D-structure,Acetylation,Alternative splicing,Bromodomain,Chromatin regulator,Coiled coil,Complete proteome,DNA-binding,Isopeptide bond,Metal-binding,Nucleus,Phosphoprotein,Polymorphism,Proteomics identification,Reference proteome,Repeat,Repressor,RNA-binding,Transcription,Transcription regulation,Ubl conjugation,Zinc,Zinc-finger,
BYSL	bystin like(BYSL)	GO:0005515~protein binding,GO:0044822~poly(A) RNA binding,		Complete proteome,Cytoplasm,Methylation,Nucleus,Phosphoprotein,Polymorphism,Proteomics identification,Reference proteome,Ribosome biogenesis,
CALM1	calmodulin 1(CALM1)	GO:0005088~Ras guanyl-nucleotide exchange factor activity,GO:0005509~calcium ion binding,GO:0005515~protein binding,GO:0008440~inositol-1,4,5-trisphosphate 3-kinase activity,GO:0015276~ligand-gated ion channel activity,GO:0016301~kinase activity,GO:0019901~protein kinase binding,GO:0019904~protein domain specific binding,GO:0030235~nitric-oxide synthase regulator activity,GO:0031432~titin binding…	SM00054:EFh,	3D-structure,Acetylation,Calcium,Complete proteome,Cytoplasm,Cytoskeleton,Direct protein sequencing,Disease mutation,Isopeptide bond,Kinase,Long QT syndrome,Metal-binding,Methylation,Phosphoprotein,Polymorphism,Proteomics identification,Reference proteome,Repeat,Transferase,Ubl conjugation,
CDC20	cell division cycle 20(CDC20)	GO:0005515~protein binding,GO:0008022~protein C-terminus binding,GO:0010997~anaphase-promoting complex binding,GO:0019899~enzyme binding,GO:0042826~histone deacetylase binding,GO:0097027~ubiquitin-protein transferase activator activity,	SM00320:WD40,	3D-structure,Acetylation,Cell cycle,Cell division,Complete proteome,Cytoplasm,Cytoskeleton,Differentiation,Isopeptide bond,Mitosis,Neurogenesis,Phosphoprotein,Polymorphism,Reference proteome,Repeat,Ubl conjugation,Ubl conjugation pathway,WD repeat,
cenpv	centromere protein V(CENPV)	GO:0016846~carbon-sulfur lyase activity,		Alternative splicing,Cell cycle,Cell division,Centromere,Chromosome,Complete proteome,Cytoplasm,Cytoskeleton,Kinetochore,Methylation,Mitosis,Nucleus,Phosphoprotein,Proteomics identification,Reference proteome,
CHEK1	checkpoint kinase 1(CHEK1)	GO:0004672~protein kinase activity,GO:0004674~protein serine/threonine kinase activity,GO:0005515~protein binding,GO:0005524~ATP binding,GO:0016301~kinase activity,GO:0035402~histone kinase activity (H3-T11 specific),	SM00220:S_TKc,	3D-structure,Alternative splicing,ATP-binding,Cell cycle,Complete proteome,Cytoplasm,Cytoskeleton,DNA damage,DNA repair,Isopeptide bond,Kinase,Nucleotide-binding,Nucleus,Phosphoprotein,Polymorphism,Proteomics identification,Reference proteome,Serine/threonine-protein kinase,Transferase,Ubl conjugation,
CHAF1A	chromatin assembly factor 1 subunit A(CHAF1A)	GO:0003682~chromatin binding,GO:0005515~protein binding,GO:0042802~identical protein binding,GO:0051082~unfolded protein binding,GO:0070087~chromo shadow domain binding,		Alternative splicing,Cell cycle,Chaperone,Coiled coil,Complete proteome,DNA damage,DNA repair,DNA replication,Isopeptide bond,Nucleus,Phosphoprotein,Polymorphism,Proteomics identification,Reference proteome,Ubl conjugation,
CHAF1B	chromatin assembly factor 1 subunit B(CHAF1B)	GO:0003682~chromatin binding,GO:0042393~histone binding,GO:0051082~unfolded protein binding,	SM00320:WD40,	Acetylation,Cell cycle,Complete proteome,Cytoplasm,Direct protein sequencing,DNA damage,DNA repair,DNA replication,Nucleus,Phosphoprotein,Polymorphism,Reference proteome,Repeat,Transcription,Transcription regulation,WD repeat,
CBX3	chromobox 3(CBX3)	GO:0005515~protein binding,GO:0019899~enzyme binding,GO:0019904~protein domain specific binding,GO:0042802~identical protein binding,GO:1990226~histone methyltransferase binding,	SM00298:CHROMO,SM00300:ChSh,	3D-structure,Acetylation,Biological rhythms,Chromatin regulator,Complete proteome,Direct protein sequencing,Isopeptide bond,Nucleus,Phosphoprotein,Proteomics identification,Reference proteome,Repeat,Repressor,Transcription,Transcription regulation,Ubl conjugation,
CHD1L	chromodomain helicase DNA binding protein 1 like(CHD1L)	GO:0000166~nucleotide binding,GO:0003676~nucleic acid binding,GO:0004003~ATP-dependent DNA helicase activity,GO:0005515~protein binding,GO:0005524~ATP binding,GO:0008026~ATP-dependent helicase activity,GO:0016887~ATPase activity,	SM00487:DEXDc,SM00490:HELICc,	Alternative splicing,ATP-binding,Coiled coil,Complete proteome,DNA damage,DNA repair,Helicase,Hydrolase,Methylation,Nucleotide-binding,Nucleus,Phosphoprotein,Polymorphism,Proteomics identification,Reference proteome,
CHD7	chromodomain helicase DNA binding protein 7(CHD7)	GO:0000978~RNA polymerase II core promoter proximal region sequence-specific DNA binding,GO:0003682~chromatin binding,GO:0004386~helicase activity,GO:0005515~protein binding,GO:0005524~ATP binding,GO:0016817~hydrolase activity, acting on acid anhydrides,GO:1990841~promoter-specific chromatin binding,	SM00298:CHROMO,SM00487:DEXDc,SM00490:HELICc,SM00592:BRK,	3D-structure,Alternative splicing,ATP-binding,Chromatin regulator,Coiled coil,Complete proteome,Disease mutation,DNA-binding,Helicase,Hydrolase,Hypogonadotropic hypogonadism,Kallmann syndrome,Methylation,Nucleotide-binding,Nucleus,Phosphoprotein,Polymorphism,Proteomics identification,Reference proteome,Repeat,rRNA processing,Transcription,Transcription regulation,
CHD9	chromodomain helicase DNA binding protein 9(CHD9)	GO:0003677~DNA binding,GO:0004386~helicase activity,GO:0005524~ATP binding,GO:0016817~hydrolase activity, acting on acid anhydrides,	SM00298:CHROMO,SM00487:DEXDc,SM00490:HELICc,SM00592:BRK,	Acetylation,Alternative splicing,ATP-binding,Chromatin regulator,Complete proteome,Cytoplasm,DNA-binding,Helicase,Hydrolase,Isopeptide bond,Nucleotide-binding,Nucleus,Phosphoprotein,Polymorphism,Proteomics identification,Reference proteome,Repeat,Transcription,Transcription regulation,Ubl conjugation,
CS	citrate synthase(CS)	GO:0004108~citrate (Si)-synthase activity,GO:0044822~poly(A) RNA binding,GO:0046912~transferase activity, transferring acyl groups, acyl groups converted into alkyl on transfer,		Acetylation,Complete proteome,Direct protein sequencing,Membrane,Methylation,Mitochondrion,Proteomics identification,Reference proteome,Transferase,Transit peptide,Transmembrane,Transmembrane helix,Tricarboxylic acid cycle,
CPSF6	cleavage and polyadenylation specific factor 6(CPSF6)	GO:0000166~nucleotide binding,GO:0003676~nucleic acid binding,GO:0003723~RNA binding,GO:0003729~mRNA binding,GO:0005515~protein binding,GO:0044822~poly(A) RNA binding,	SM00360:RRM,	3D-structure,Alternative splicing,Complete proteome,Direct protein sequencing,mRNA processing,Nucleus,Phosphoprotein,Proteomics identification,Reference proteome,RNA-binding,
CPSF7	cleavage and polyadenylation specific factor 7(CPSF7)	GO:0000166~nucleotide binding,GO:0003676~nucleic acid binding,GO:0005515~protein binding,GO:0044822~poly(A) RNA binding,	SM00360:RRM,	3D-structure,Alternative splicing,Complete proteome,mRNA processing,Nucleus,Phosphoprotein,Proteomics identification,Reference proteome,RNA-binding,
CSTF3	cleavage stimulation factor subunit 3(CSTF3)	GO:0003723~RNA binding,GO:0003729~mRNA binding,GO:0005515~protein binding,GO:0044822~poly(A) RNA binding,	SM00386:HAT,	Acetylation,Alternative splicing,Complete proteome,mRNA processing,Nucleus,Phosphoprotein,Proteomics identification,Reference proteome,Repeat,
CMSS1	cms1 ribosomal small subunit homolog (yeast)(CMSS1)	GO:0044822~poly(A) RNA binding,		Alternative splicing,Complete proteome,Methylation,Phosphoprotein,Polymorphism,Proteomics identification,Reference proteome,
CARM1	coactivator associated arginine methyltransferase 1(CARM1)	GO:0003713~transcription coactivator activity,GO:0005515~protein binding,GO:0008013~beta-catenin binding,GO:0008168~methyltransferase activity,GO:0008276~protein methyltransferase activity,GO:0008469~histone-arginine N-methyltransferase activity,GO:0016274~protein-arginine N-methyltransferase activity,GO:0030374~ligand-dependent nuclear receptor transcription coactivator activity,GO:0035242~prote…		3D-structure,Acetylation,Alternative splicing,Chromatin regulator,Complete proteome,Cytoplasm,Host-virus interaction,Methylation,Methyltransferase,Nucleus,Phosphoprotein,Proteomics identification,Reference proteome,S-adenosyl-L-methionine,Transcription,Transcription regulation,Transferase,
CBFB	core-binding factor beta subunit(CBFB)	GO:0003677~DNA binding,GO:0003700~transcription factor activity, sequence-specific DNA binding,GO:0003712~transcription cofactor activity,GO:0003713~transcription coactivator activity,GO:0005515~protein binding,		3D-structure,Alternative splicing,Chromosomal rearrangement,Complete proteome,Nucleus,Phosphoprotein,Polymorphism,Proteomics identification,Proto-oncogene,Reference proteome,
coro1a	coronin 1A(CORO1A)	GO:0003779~actin binding,GO:0003785~actin monomer binding,GO:0005515~protein binding,GO:0008022~protein C-terminus binding,GO:0008092~cytoskeletal protein binding,GO:0032036~myosin heavy chain binding,GO:0042803~protein homodimerization activity,GO:0043548~phosphatidylinositol 3-kinase binding,GO:0044822~poly(A) RNA binding,GO:0051015~actin filament binding,	SM00320:WD40,SM01166:SM01166,	Acetylation,Actin-binding,Coiled coil,Complete proteome,Cytoplasm,Cytoplasmic vesicle,Cytoskeleton,Direct protein sequencing,Disease mutation,Membrane,Phosphoprotein,Polymorphism,Proteomics identification,Reference proteome,Repeat,Ubl conjugation,WD repeat,
CDK1	cyclin dependent kinase 1(CDK1)	GO:0003682~chromatin binding,GO:0004672~protein kinase activity,GO:0004674~protein serine/threonine kinase activity,GO:0004693~cyclin-dependent protein serine/threonine kinase activity,GO:0005515~protein binding,GO:0005524~ATP binding,GO:0008353~RNA polymerase II carboxy-terminal domain kinase activity,GO:0030332~cyclin binding,GO:0030544~Hsp70 protein binding,GO:0035173~histone kinase activity,	SM00220:S_TKc,	3D-structure,Acetylation,Alternative splicing,Apoptosis,ATP-binding,Cell cycle,Cell division,Complete proteome,Cytoplasm,Cytoskeleton,Isopeptide bond,Kinase,Mitochondrion,Mitosis,Nucleotide-binding,Nucleus,Phosphoprotein,Proteomics identification,Reference proteome,Serine/threonine-protein kinase,Transferase,Ubl conjugation,
CSRP1	cysteine and glycine rich protein 1(CSRP1)	GO:0008270~zinc ion binding,GO:0044822~poly(A) RNA binding,	SM00132:LIM,	Acetylation,Complete proteome,LIM domain,Metal-binding,Nucleus,Phosphoprotein,Polymorphism,Proteomics identification,Reference proteome,Repeat,Zinc,
CSRP2	cysteine and glycine rich protein 2(CSRP2)	GO:0005515~protein binding,GO:0008270~zinc ion binding,	SM00132:LIM,	Acetylation,Complete proteome,Developmental protein,Differentiation,LIM domain,Metal-binding,Nucleus,Proteomics identification,Reference proteome,Repeat,Zinc,
CMAS	cytidine monophosphate N-acetylneuraminic acid synthetase(CMAS)	GO:0008781~N-acylneuraminate cytidylyltransferase activity,		Acetylation,Alternative splicing,Complete proteome,Direct protein sequencing,Methylation,Nucleotidyltransferase,Nucleus,Proteomics identification,Reference proteome,Transferase,
CMPK1	cytidine/uridine monophosphate kinase 1(CMPK1)	GO:0004127~cytidylate kinase activity,GO:0004550~nucleoside diphosphate kinase activity,GO:0004849~uridine kinase activity,GO:0005524~ATP binding,GO:0009041~uridylate kinase activity,GO:0019205~nucleobase-containing compound kinase activity,GO:0050145~nucleoside phosphate kinase activity,		3D-structure,Acetylation,Alternative splicing,ATP-binding,Complete proteome,Cytoplasm,Direct protein sequencing,Kinase,Nucleotide-binding,Nucleus,Phosphoprotein,Proteomics identification,Pyrimidine biosynthesis,Reference proteome,Signal,Transferase,
DDB1	damage specific DNA binding protein 1(DDB1)	GO:0003676~nucleic acid binding,GO:0003677~DNA binding,GO:0003684~damaged DNA binding,GO:0005515~protein binding,		3D-structure,Acetylation,Alternative splicing,Complete proteome,Cytoplasm,DNA damage,DNA repair,DNA-binding,Host-virus interaction,Nucleus,Phosphoprotein,Polymorphism,Proteomics identification,Reference proteome,Repeat,Ubl conjugation,Ubl conjugation pathway,
DOCK1	dedicator of cytokinesis 1(DOCK1)	GO:0005085~guanyl-nucleotide exchange factor activity,GO:0005089~Rho guanyl-nucleotide exchange factor activity,GO:0005096~GTPase activator activity,GO:0005515~protein binding,GO:0017124~SH3 domain binding,	SM00326:SH3,	3D-structure,Apoptosis,Coiled coil,Complete proteome,Cytoplasm,Guanine-nucleotide releasing factor,Membrane,Phagocytosis,Phosphoprotein,Polymorphism,Proteomics identification,Reference proteome,SH3 domain,SH3-binding,
DNM2	dynamin 2(DNM2)	GO:0003924~GTPase activity,GO:0005515~protein binding,GO:0005525~GTP binding,GO:0008017~microtubule binding,GO:0017124~SH3 domain binding,GO:0019899~enzyme binding,GO:0019901~protein kinase binding,GO:0031749~D2 dopamine receptor binding,GO:0032403~protein complex binding,GO:0036312~phosphatidylinositol 3-kinase regulatory subunit binding,GO:0050699~WW domain binding,GO:0050998~nitric-oxide synth…	SM00053:DYNc,SM00233:PH,SM00302:GED,	3D-structure,Acetylation,Alternative splicing,Cell junction,Cell membrane,Cell projection,Charcot-Marie-Tooth disease,Coated pit,Complete proteome,Cytoplasm,Cytoplasmic vesicle,Cytoskeleton,Disease mutation,Endocytosis,GTP-binding,Hydrolase,Membrane,Microtubule,Motor protein,Neurodegeneration,Neuropathy,Nucleotide-binding,Phagocytosis,Phosphoprotein,Polymorphism,Postsynaptic cell membrane,Proteom…
DKC1	dyskerin pseudouridine synthase 1(DKC1)	GO:0003720~telomerase activity,GO:0003723~RNA binding,GO:0005515~protein binding,GO:0009982~pseudouridine synthase activity,GO:0034513~box H/ACA snoRNA binding,GO:0044822~poly(A) RNA binding,GO:0070034~telomerase RNA binding,	SM00359:PUA,SM01136:SM01136,	Acetylation,Alternative splicing,Complete proteome,Cytoplasm,Direct protein sequencing,Disease mutation,Dyskeratosis congenita,Isomerase,Isopeptide bond,Membrane,Nucleus,Phosphoprotein,Proteomics identification,Reference proteome,Ribonucleoprotein,Ribosome biogenesis,RNA-binding,rRNA processing,Transmembrane,Transmembrane helix,Ubl conjugation,
EDF1	endothelial differentiation related factor 1(EDF1)	GO:0003700~transcription factor activity, sequence-specific DNA binding,GO:0003713~transcription coactivator activity,GO:0004402~histone acetyltransferase activity,GO:0005515~protein binding,GO:0005516~calmodulin binding,GO:0008168~methyltransferase activity,GO:0043565~sequence-specific DNA binding,GO:0044822~poly(A) RNA binding,	SM00530:HTH_XRE,	3D-structure,Acetylation,Activator,Alternative splicing,Calmodulin-binding,Complete proteome,Cytoplasm,Developmental protein,Differentiation,Direct protein sequencing,DNA-binding,Methylation,Nucleus,Phosphoprotein,Reference proteome,Transcription,Transcription regulation,
ESRRA	estrogen related receptor alpha(ESRRA)	GO:0000978~RNA polymerase II core promoter proximal region sequence-specific DNA binding,GO:0001077~transcriptional activator activity, RNA polymerase II core promoter proximal region sequence-specific binding,GO:0001078~transcriptional repressor activity, RNA polymerase II core promoter proximal region sequence-specific binding,GO:0003677~DNA binding,GO:0003700~transcription factor activity, seq…	SM00399:ZnF_C4,SM00430:HOLI,	3D-structure,Acetylation,Alternative splicing,Complete proteome,Direct protein sequencing,DNA-binding,Isopeptide bond,Metal-binding,Nucleus,Phosphoprotein,Proteomics identification,Receptor,Reference proteome,Transcription,Transcription regulation,Ubl conjugation,Zinc,Zinc-finger,
EEFSEC	eukaryotic elongation factor, selenocysteine-tRNA specific(EEFSEC)	GO:0000049~tRNA binding,GO:0003746~translation elongation factor activity,GO:0003924~GTPase activity,GO:0005525~GTP binding,GO:0035368~selenocysteine insertion sequence binding,GO:0043021~ribonucleoprotein complex binding,		Alternative splicing,Complete proteome,Cytoplasm,GTP-binding,Methylation,Nucleotide-binding,Nucleus,Phosphoprotein,Polymorphism,Protein biosynthesis,Proteomics identification,Reference proteome,
EEF1A1	eukaryotic translation elongation factor 1 alpha 1(EEF1A1)	GO:0000049~tRNA binding,GO:0003746~translation elongation factor activity,GO:0003924~GTPase activity,GO:0005515~protein binding,GO:0005525~GTP binding,GO:0019901~protein kinase binding,GO:0044822~poly(A) RNA binding,		3D-structure,Acetylation,Alternative splicing,Complete proteome,Cytoplasm,Direct protein sequencing,Elongation factor,GTP-binding,Methylation,Nucleotide-binding,Nucleus,Phosphoprotein,Protein biosynthesis,Proteomics identification,Reference proteome,Transcription,Transcription regulation,Ubl conjugation,
EEF1A2	eukaryotic translation elongation factor 1 alpha 2(EEF1A2)	GO:0003746~translation elongation factor activity,GO:0003924~GTPase activity,GO:0005515~protein binding,GO:0005525~GTP binding,GO:0008135~translation factor activity, RNA binding,GO:0019901~protein kinase binding,		3D-structure,Acetylation,Autism spectrum disorder,Complete proteome,Disease mutation,Elongation factor,Epilepsy,GTP-binding,Mental retardation,Methylation,Nucleotide-binding,Nucleus,Phosphoprotein,Polymorphism,Protein biosynthesis,Reference proteome,
EEF1B2	eukaryotic translation elongation factor 1 beta 2(EEF1B2)	GO:0003746~translation elongation factor activity,GO:0005515~protein binding,	SM00888:SM00888,SM01182:SM01182,	3D-structure,Acetylation,Complete proteome,Direct protein sequencing,Elongation factor,Phosphoprotein,Protein biosynthesis,Proteomics identification,Reference proteome,
EEF1D	eukaryotic translation elongation factor 1 delta(EEF1D)	GO:0003677~DNA binding,GO:0003746~translation elongation factor activity,GO:0004871~signal transducer activity,GO:0005515~protein binding,GO:0008135~translation factor activity, RNA binding,GO:0031072~heat shock protein binding,GO:0033613~activating transcription factor binding,GO:0098641~cadherin binding involved in cell-cell adhesion,	SM00888:SM00888,SM01182:SM01182,	3D-structure,Acetylation,Alternative splicing,Coiled coil,Complete proteome,Direct protein sequencing,DNA-binding,Elongation factor,Nucleus,Phosphoprotein,Protein biosynthesis,Proteomics identification,Reference proteome,Transcription,Transcription regulation,
EEF1G	eukaryotic translation elongation factor 1 gamma(EEF1G)	GO:0003746~translation elongation factor activity,GO:0004364~glutathione transferase activity,GO:0005515~protein binding,GO:0098641~cadherin binding involved in cell-cell adhesion,	SM01183:SM01183,	3D-structure,Acetylation,Alternative splicing,Complete proteome,Direct protein sequencing,Elongation factor,Isopeptide bond,Protein biosynthesis,Reference proteome,Ubl conjugation,
EEF2	eukaryotic translation elongation factor 2(EEF2)	GO:0002039~p53 binding,GO:0003746~translation elongation factor activity,GO:0003924~GTPase activity,GO:0005515~protein binding,GO:0005525~GTP binding,GO:0008097~5S rRNA binding,GO:0019901~protein kinase binding,GO:0043022~ribosome binding,GO:0044822~poly(A) RNA binding,GO:0051015~actin filament binding,GO:0098641~cadherin binding involved in cell-cell adhesion,	SM00838:SM00838,SM00889:SM00889,	3D-structure,Acetylation,Complete proteome,Cytoplasm,Direct protein sequencing,Disease mutation,Elongation factor,GTP-binding,Isopeptide bond,Methylation,Neurodegeneration,Nucleotide-binding,Nucleus,Phosphoprotein,Protein biosynthesis,Proteomics identification,Reference proteome,Spinocerebellar ataxia,Ubl conjugation,
EIF2S1	eukaryotic translation initiation factor 2 subunit alpha(EIF2S1)	GO:0003743~translation initiation factor activity,GO:0005515~protein binding,GO:0043022~ribosome binding,GO:0044822~poly(A) RNA binding,	SM00316:SM00316,	3D-structure,Acetylation,Coiled coil,Complete proteome,Initiation factor,Phosphoprotein,Protein biosynthesis,Proteomics identification,Reference proteome,RNA-binding,Translation regulation,
EIF2S2	eukaryotic translation initiation factor 2 subunit beta(EIF2S2)	GO:0003723~RNA binding,GO:0003743~translation initiation factor activity,GO:0005515~protein binding,GO:0008135~translation factor activity, RNA binding,GO:0044822~poly(A) RNA binding,GO:0046872~metal ion binding,	SM00653:eIF2B_5,	Acetylation,Complete proteome,Initiation factor,Metal-binding,Phosphoprotein,Polymorphism,Protein biosynthesis,Reference proteome,Zinc,Zinc-finger,
EIF4A1	eukaryotic translation initiation factor 4A1(EIF4A1)	GO:0000339~RNA cap binding,GO:0003676~nucleic acid binding,GO:0003725~double-stranded RNA binding,GO:0003729~mRNA binding,GO:0003743~translation initiation factor activity,GO:0004004~ATP-dependent RNA helicase activity,GO:0004386~helicase activity,GO:0005515~protein binding,GO:0005524~ATP binding,GO:0008135~translation factor activity, RNA binding,GO:0044822~poly(A) RNA binding,	SM00487:DEXDc,SM00490:HELICc,	3D-structure,Acetylation,Alternative splicing,ATP-binding,Complete proteome,Helicase,Host-virus interaction,Hydrolase,Initiation factor,Nucleotide-binding,Phosphoprotein,Protein biosynthesis,Proteomics identification,Reference proteome,RNA-binding,
ETF1	eukaryotic translation termination factor 1(ETF1)	GO:0003723~RNA binding,GO:0003747~translation release factor activity,GO:0005515~protein binding,GO:0008079~translation termination factor activity,GO:0016149~translation release factor activity, codon specific,GO:0043022~ribosome binding,GO:0044822~poly(A) RNA binding,	SM01194:SM01194,	3D-structure,Acetylation,Alternative splicing,Complete proteome,Cytoplasm,Direct protein sequencing,Nonsense-mediated mRNA decay,Phosphoprotein,Protein biosynthesis,Proteomics identification,Reference proteome,
FAM103A1	family with sequence similarity 103 member A1(FAM103A1)	GO:0003723~RNA binding,GO:0005515~protein binding,GO:0044822~poly(A) RNA binding,		3D-structure,Acetylation,Complete proteome,Methylation,mRNA capping,mRNA processing,Nucleus,Phosphoprotein,Reference proteome,RNA-binding,
FAM120A	family with sequence similarity 120A(FAM120A)	GO:0044822~poly(A) RNA binding,		Acetylation,Alternative splicing,Cell membrane,Complete proteome,Cytoplasm,Membrane,Methylation,Phosphoprotein,Polymorphism,Proteomics identification,Reference proteome,RNA-binding,Tumor suppressor,
FAM32A	family with sequence similarity 32 member A(FAM32A)	GO:0005515~protein binding,GO:0044822~poly(A) RNA binding,		Alternative splicing,Apoptosis,Cell cycle,Complete proteome,Nucleus,Proteomics identification,Reference proteome,
FAM50A	family with sequence similarity 50 member A(FAM50A)	GO:0044822~poly(A) RNA binding,		Acetylation,Coiled coil,Complete proteome,Direct protein sequencing,Nucleus,Proteomics identification,Reference proteome,
FAM58A	family with sequence similarity 58 member A(FAM58A)	GO:0005515~protein binding,GO:0016538~cyclin-dependent protein serine/threonine kinase regulator activity,GO:0030295~protein kinase activator activity,	SM00385:CYCLIN,	Acetylation,Alternative splicing,Complete proteome,Cyclin,Polymorphism,Proteomics identification,Reference proteome,
FAM83G	family with sequence similarity 83 member G(FAM83G)	GO:0005515~protein binding,		Acetylation,Alternative splicing,Complete proteome,Cytoplasm,Nucleus,Phosphoprotein,Polymorphism,Proteomics identification,Reference proteome,
FAM98B	family with sequence similarity 98 member B(FAM98B)	GO:0044822~poly(A) RNA binding,		Alternative splicing,Complete proteome,Cytoplasm,Nucleus,Proteomics identification,Reference proteome,
FLNA	filamin A(FLNA)	GO:0001664~G-protein coupled receptor binding,GO:0001948~glycoprotein binding,GO:0004871~signal transducer activity,GO:0005515~protein binding,GO:0008134~transcription factor binding,GO:0015459~potassium channel regulator activity,GO:0017048~Rho GTPase binding,GO:0017160~Ral GTPase binding,GO:0019900~kinase binding,GO:0031267~small GTPase binding,GO:0031852~mu-type opioid receptor binding,GO:0034…	SM00033:CH,SM00557:IG_FLMN,	3D-structure,Acetylation,Actin-binding,Alternative splicing,Cilium biogenesis/degradation,Complete proteome,Cytoplasm,Cytoskeleton,Direct protein sequencing,Disease mutation,Isopeptide bond,Phosphoprotein,Polymorphism,Proteomics identification,Reference proteome,Repeat,Ubl conjugation,
FHL3	four and a half LIM domains 3(FHL3)	GO:0003779~actin binding,GO:0005515~protein binding,GO:0008270~zinc ion binding,	SM00132:LIM,	3D-structure,Acetylation,Complete proteome,LIM domain,Metal-binding,Reference proteome,Repeat,Zinc,Zinc-finger,
FMR1	fragile X mental retardation 1(FMR1)	GO:0002151~G-quadruplex RNA binding,GO:0003682~chromatin binding,GO:0003723~RNA binding,GO:0003729~mRNA binding,GO:0003730~mRNA 3'-UTR binding,GO:0005515~protein binding,GO:0008017~microtubule binding,GO:0008266~poly(U) RNA binding,GO:0030371~translation repressor activity,GO:0031369~translation initiation factor binding,GO:0033592~RNA strand annealing activity,GO:0034046~poly(G) binding,GO:00350…	SM00322:KH,	3D-structure,Acetylation,Activator,Alternative splicing,Cell junction,Cell membrane,Cell projection,Centromere,Chromosome,Complete proteome,Cytoplasm,Disease mutation,DNA damage,Host-virus interaction,Membrane,Mental retardation,Methylation,mRNA processing,mRNA splicing,mRNA transport,Neurogenesis,Nucleus,Phosphoprotein,Polymorphism,Postsynaptic cell membrane,Premature ovarian failure,Proteomics …
GTF2B	general transcription factor IIB(GTF2B)	GO:0001047~core promoter binding,GO:0005515~protein binding,GO:0008134~transcription factor binding,GO:0008270~zinc ion binding,GO:0017025~TBP-class protein binding,GO:0046966~thyroid hormone receptor binding,	SM00385:CYCLIN,	3D-structure,Complete proteome,Host-virus interaction,Metal-binding,Nucleus,Phosphoprotein,Polymorphism,Proteomics identification,Reference proteome,Repeat,Transcription,Transcription regulation,Zinc,Zinc-finger,
GTF2I	general transcription factor IIi(GTF2I)	GO:0000981~RNA polymerase II transcription factor activity, sequence-specific DNA binding,GO:0003677~DNA binding,GO:0003700~transcription factor activity, sequence-specific DNA binding,GO:0005515~protein binding,GO:0051019~mitogen-activated protein kinase binding,		3D-structure,Acetylation,Alternative splicing,Complete proteome,Cytoplasm,Direct protein sequencing,DNA-binding,Isopeptide bond,Nucleus,Phosphoprotein,Polymorphism,Proteomics identification,Reference proteome,Repeat,Transcription,Transcription regulation,Ubl conjugation,Williams-Beuren syndrome,
GRB2	growth factor receptor bound protein 2(GRB2)	GO:0001784~phosphotyrosine binding,GO:0005070~SH3/SH2 adaptor activity,GO:0005088~Ras guanyl-nucleotide exchange factor activity,GO:0005154~epidermal growth factor receptor binding,GO:0005168~neurotrophin TRKA receptor binding,GO:0005515~protein binding,GO:0016303~1-phosphatidylinositol-3-kinase activity,GO:0017124~SH3 domain binding,GO:0019901~protein kinase binding,GO:0019903~protein phosphatas…	SM00252:SH2,SM00326:SH3,	3D-structure,Acetylation,Alternative splicing,Complete proteome,Cytoplasm,Direct protein sequencing,Endosome,Golgi apparatus,Host-virus interaction,Nucleus,Phosphoprotein,Proteomics identification,Receptor,Reference proteome,Repeat,SH2 domain,SH3 domain,
HELZ	helicase with zinc finger(HELZ)	GO:0004386~helicase activity,GO:0005524~ATP binding,GO:0044822~poly(A) RNA binding,GO:0046872~metal ion binding,	SM00356:ZnF_C3H1,	Alternative splicing,ATP-binding,Complete proteome,Helicase,Hydrolase,Membrane,Metal-binding,Methylation,Nucleotide-binding,Nucleus,Phosphoprotein,Polymorphism,Proteomics identification,Reference proteome,Transmembrane,Transmembrane helix,Zinc,Zinc-finger,
HELLS	helicase, lymphoid-specific(HELLS)	GO:0003682~chromatin binding,GO:0004386~helicase activity,GO:0005515~protein binding,GO:0005524~ATP binding,	SM00487:DEXDc,SM00490:HELICc,	Alternative splicing,ATP-binding,Cell cycle,Cell division,Coiled coil,Complete proteome,Developmental protein,Disease mutation,Helicase,Hydrolase,Mitosis,Nucleotide-binding,Nucleus,Phosphoprotein,Polymorphism,Proteomics identification,Reference proteome,Transcription,Transcription regulation,
HP1BP3	heterochromatin protein 1 binding protein 3(HP1BP3)	GO:0003677~DNA binding,GO:0003682~chromatin binding,GO:0005515~protein binding,GO:0031491~nucleosome binding,	SM00526:H15,	3D-structure,Acetylation,Alternative splicing,Chromosome,Coiled coil,Complete proteome,Direct protein sequencing,DNA-binding,Nucleus,Phosphoprotein,Proteomics identification,Reference proteome,Repeat,
HNRNPA0	heterogeneous nuclear ribonucleoprotein A0(HNRNPA0)	GO:0000166~nucleotide binding,GO:0003723~RNA binding,GO:0017091~AU-rich element binding,GO:0019901~protein kinase binding,GO:0044822~poly(A) RNA binding,	SM00360:RRM,	Acetylation,Complete proteome,Direct protein sequencing,Isopeptide bond,Methylation,Nucleus,Phosphoprotein,Reference proteome,Repeat,Ribonucleoprotein,RNA-binding,Ubl conjugation,
HNRNPA1	heterogeneous nuclear ribonucleoprotein A1(HNRNPA1)	GO:0000166~nucleotide binding,GO:0003676~nucleic acid binding,GO:0003697~single-stranded DNA binding,GO:0003723~RNA binding,GO:0003727~single-stranded RNA binding,GO:0005515~protein binding,GO:0044822~poly(A) RNA binding,GO:0061752~telomeric repeat-containing RNA binding,GO:0098505~G-rich strand telomeric DNA binding,	SM00360:RRM,	3D-structure,Acetylation,Alternative splicing,Amyotrophic lateral sclerosis,Complete proteome,Cytoplasm,Direct protein sequencing,Disease mutation,Host-virus interaction,Isopeptide bond,Methylation,mRNA processing,mRNA splicing,mRNA transport,Neurodegeneration,Nucleus,Phosphoprotein,Polymorphism,Proteomics identification,Reference proteome,Repeat,Ribonucleoprotein,RNA-binding,Spliceosome,Transpor…
HNRNPA2B1	heterogeneous nuclear ribonucleoprotein A2/B1(HNRNPA2B1)	GO:0000166~nucleotide binding,GO:0003676~nucleic acid binding,GO:0003723~RNA binding,GO:0003730~mRNA 3'-UTR binding,GO:0005515~protein binding,GO:0035198~miRNA binding,GO:0043047~single-stranded telomeric DNA binding,GO:0044822~poly(A) RNA binding,GO:0097157~pre-mRNA intronic binding,GO:1990247~N6-methyladenosine-containing RNA binding,	SM00360:RRM,	3D-structure,Acetylation,Alternative splicing,Complete proteome,Cytoplasm,Direct protein sequencing,Disease mutation,Isopeptide bond,Methylation,mRNA processing,mRNA splicing,mRNA transport,Nucleus,Phosphoprotein,Proteomics identification,Reference proteome,Repeat,Ribonucleoprotein,RNA-binding,Secreted,Spliceosome,Transport,Ubl conjugation,
HNRNPA3	heterogeneous nuclear ribonucleoprotein A3(HNRNPA3)	GO:0000166~nucleotide binding,GO:0003676~nucleic acid binding,GO:0003723~RNA binding,GO:0003729~mRNA binding,GO:0005515~protein binding,GO:0044822~poly(A) RNA binding,GO:0051033~RNA transmembrane transporter activity,	SM00360:RRM,	Acetylation,Alternative splicing,Complete proteome,Direct protein sequencing,Isopeptide bond,Methylation,mRNA processing,mRNA splicing,Nucleus,Phosphoprotein,Proteomics identification,Reference proteome,Repeat,Ribonucleoprotein,RNA-binding,Spliceosome,Ubl conjugation,Viral nucleoprotein,Virion,
HNRNPDL	heterogeneous nuclear ribonucleoprotein D like(HNRNPDL)	GO:0000166~nucleotide binding,GO:0003676~nucleic acid binding,GO:0003677~DNA binding,GO:0003690~double-stranded DNA binding,GO:0003697~single-stranded DNA binding,GO:0005515~protein binding,GO:0008143~poly(A) binding,GO:0034046~poly(G) binding,GO:0044822~poly(A) RNA binding,	SM00360:RRM,	Acetylation,Activator,Alternative splicing,Complete proteome,Cytoplasm,Direct protein sequencing,Disease mutation,DNA-binding,Limb-girdle muscular dystrophy,Methylation,Nucleus,Phosphoprotein,Proteomics identification,Reference proteome,Repeat,Repressor,Ribonucleoprotein,RNA-binding,Transcription,Transcription regulation,Viral nucleoprotein,Virion,
HNRNPD	heterogeneous nuclear ribonucleoprotein D(HNRNPD)	GO:0000166~nucleotide binding,GO:0003676~nucleic acid binding,GO:0003680~AT DNA binding,GO:0003682~chromatin binding,GO:0003723~RNA binding,GO:0005515~protein binding,GO:0008134~transcription factor binding,GO:0035925~mRNA 3'-UTR AU-rich region binding,GO:0042162~telomeric DNA binding,GO:0042826~histone deacetylase binding,GO:0044822~poly(A) RNA binding,	SM00360:RRM,	3D-structure,Acetylation,Alternative splicing,Biological rhythms,Complete proteome,Cytoplasm,Direct protein sequencing,DNA-binding,Isopeptide bond,Methylation,Nucleus,Phosphoprotein,Proteomics identification,Reference proteome,Repeat,Ribonucleoprotein,RNA-binding,Transcription,Transcription regulation,Ubl conjugation,Viral nucleoprotein,Virion,
HNRNPH1	heterogeneous nuclear ribonucleoprotein H1 (H)(HNRNPH1)	GO:0000166~nucleotide binding,GO:0003676~nucleic acid binding,GO:0003723~RNA binding,GO:0005515~protein binding,GO:0008266~poly(U) RNA binding,GO:0044822~poly(A) RNA binding,	SM00360:RRM,	3D-structure,Acetylation,Complete proteome,Direct protein sequencing,Methylation,mRNA processing,mRNA splicing,Nucleus,Phosphoprotein,Proteomics identification,Reference proteome,Repeat,Ribonucleoprotein,RNA-binding,Spliceosome,
HNRNPH3	heterogeneous nuclear ribonucleoprotein H3(HNRNPH3)	GO:0000166~nucleotide binding,GO:0003676~nucleic acid binding,GO:0003723~RNA binding,GO:0005515~protein binding,GO:0044822~poly(A) RNA binding,	SM00360:RRM,	Acetylation,Alternative splicing,Complete proteome,Direct protein sequencing,Methylation,mRNA processing,Nucleus,Phosphoprotein,Polymorphism,Reference proteome,Repeat,Ribonucleoprotein,RNA-binding,Viral nucleoprotein,Virion,
HNRNPLL	heterogeneous nuclear ribonucleoprotein L like(HNRNPLL)	GO:0000166~nucleotide binding,GO:0003676~nucleic acid binding,GO:0003723~RNA binding,GO:0003729~mRNA binding,GO:0005515~protein binding,GO:0044822~poly(A) RNA binding,	SM00360:RRM,	Alternative splicing,Complete proteome,Phosphoprotein,Proteomics identification,Reference proteome,Repeat,Ribonucleoprotein,RNA-binding,Viral nucleoprotein,Virion,
HNRNPL	heterogeneous nuclear ribonucleoprotein L(HNRNPL)	GO:0000166~nucleotide binding,GO:0003676~nucleic acid binding,GO:0003723~RNA binding,GO:0005515~protein binding,GO:0044212~transcription regulatory region DNA binding,GO:0044822~poly(A) RNA binding,GO:0097157~pre-mRNA intronic binding,	SM00360:RRM,	3D-structure,Acetylation,Alternative splicing,Complete proteome,Cytoplasm,Direct protein sequencing,Isopeptide bond,Methylation,Nucleus,Phosphoprotein,Proteomics identification,Reference proteome,Repeat,Ribonucleoprotein,RNA-binding,Ubl conjugation,Viral nucleoprotein,Virion,
HNRNPUL1	heterogeneous nuclear ribonucleoprotein U like 1(HNRNPUL1)	GO:0003723~RNA binding,GO:0005515~protein binding,GO:0019899~enzyme binding,GO:0044822~poly(A) RNA binding,	SM00449:SPRY,SM00513:SAP,	Activator,Alternative splicing,Complete proteome,Isopeptide bond,Methylation,Nucleus,Phosphoprotein,Polymorphism,Proteomics identification,Reference proteome,Repeat,Repressor,Ribonucleoprotein,RNA-binding,Transcription,Transcription regulation,Ubl conjugation,Viral nucleoprotein,Virion,
HNRNPUL2	heterogeneous nuclear ribonucleoprotein U like 2(HNRNPUL2)	GO:0044822~poly(A) RNA binding,	SM00449:SPRY,SM00513:SAP,	Complete proteome,Direct protein sequencing,Membrane,Methylation,Nucleus,Phosphoprotein,Reference proteome,Transmembrane,Transmembrane helix,
HNRNPU	heterogeneous nuclear ribonucleoprotein U(HNRNPU)	GO:0001047~core promoter binding,GO:0003677~DNA binding,GO:0003723~RNA binding,GO:0005515~protein binding,GO:0005524~ATP binding,GO:0034046~poly(G) binding,GO:0035326~enhancer binding,GO:0043021~ribonucleoprotein complex binding,GO:0044822~poly(A) RNA binding,GO:0070034~telomerase RNA binding,	SM00449:SPRY,SM00513:SAP,	3D-structure,Acetylation,Alternative splicing,ATP-binding,Biological rhythms,Citrullination,Coiled coil,Complete proteome,Cytoplasm,Direct protein sequencing,DNA-binding,Isopeptide bond,Methylation,mRNA processing,mRNA splicing,Nucleotide-binding,Nucleus,Phosphoprotein,Polymorphism,Proteomics identification,Reference proteome,Ribonucleoprotein,RNA-binding,Spliceosome,Ubl conjugation,
HDLBP	high density lipoprotein binding protein(HDLBP)	GO:0003723~RNA binding,GO:0005515~protein binding,GO:0008289~lipid binding,GO:0044822~poly(A) RNA binding,GO:0098641~cadherin binding involved in cell-cell adhesion,	SM00322:KH,	3D-structure,Acetylation,Alternative splicing,Cholesterol metabolism,Coiled coil,Complete proteome,Cytoplasm,Direct protein sequencing,HDL,Lipid metabolism,Lipid transport,Lipoprotein,Nucleus,Phosphoprotein,Polymorphism,Proteomics identification,Reference proteome,Repeat,RNA-binding,Steroid metabolism,Sterol metabolism,Transport,
HMGA1	high mobility group AT-hook 1(HMGA1)	GO:0001205~transcriptional activator activity, RNA polymerase II distal enhancer sequence-specific binding,GO:0003677~DNA binding,GO:0003680~AT DNA binding,GO:0003682~chromatin binding,GO:0003700~transcription factor activity, sequence-specific DNA binding,GO:0003906~DNA-(apurinic or apyrimidinic site) lyase activity,GO:0005515~protein binding,GO:0008134~transcription factor binding,GO:0019899~en…	SM00384:AT_hook,	3D-structure,Acetylation,Alternative splicing,Chromosomal rearrangement,Chromosome,Complete proteome,Direct protein sequencing,DNA-binding,Host-virus interaction,Membrane,Methylation,Nucleus,Phosphoprotein,Reference proteome,Repeat,Transcription,Transcription regulation,Transmembrane,Transmembrane helix,
HMGA2	high mobility group AT-hook 2(HMGA2)	GO:0000975~regulatory region DNA binding,GO:0000989~transcription factor activity, transcription factor binding,GO:0001047~core promoter binding,GO:0001077~transcriptional activator activity, RNA polymerase II core promoter proximal region sequence-specific binding,GO:0001078~transcriptional repressor activity, RNA polymerase II core promoter proximal region sequence-specific binding,GO:0003677~D…	SM00384:AT_hook,	Acetylation,Alternative splicing,Cell cycle,Cell division,Chromosomal rearrangement,Complete proteome,Direct protein sequencing,DNA condensation,DNA-binding,Growth regulation,Mitosis,Nucleus,Phosphoprotein,Proteomics identification,Proto-oncogene,Reference proteome,Repeat,Transcription,Transcription regulation,
HMGB2	high mobility group box 2(HMGB2)	GO:0000400~four-way junction DNA binding,GO:0001158~enhancer sequence-specific DNA binding,GO:0003677~DNA binding,GO:0003684~damaged DNA binding,GO:0003690~double-stranded DNA binding,GO:0003697~single-stranded DNA binding,GO:0003700~transcription factor activity, sequence-specific DNA binding,GO:0005515~protein binding,GO:0008134~transcription factor binding,GO:0008144~drug binding,GO:0008301~DN…	SM00398:HMG,	Acetylation,Chemotaxis,Chromosome,Complete proteome,Cytoplasm,Disulfide bond,DNA recombination,DNA-binding,Immunity,Inflammatory response,Innate immunity,Nucleus,Phosphoprotein,Proteomics identification,Reference proteome,Repeat,Secreted,Transcription,Transcription regulation,
HMGB3	high mobility group box 3(HMGB3)	GO:0000400~four-way junction DNA binding,GO:0003677~DNA binding,GO:0003690~double-stranded DNA binding,GO:0005515~protein binding,GO:0008301~DNA binding, bending,GO:0044822~poly(A) RNA binding,	SM00398:HMG,	3D-structure,Chromosome,Complete proteome,Cytoplasm,Disulfide bond,DNA-binding,Immunity,Innate immunity,Microphthalmia,Nucleus,Polymorphism,Proteomics identification,Reference proteome,Repeat,Transcription,Transcription regulation,
Hpf1	histone PARylation factor 1(HPF1)	GO:0005515~protein binding,GO:0042393~histone binding,		Acetylation,Complete proteome,Polymorphism,Reference proteome,
HIST1H1C	histone cluster 1 H1 family member c(HIST1H1C)	GO:0005515~protein binding,GO:0031490~chromatin DNA binding,GO:0044822~poly(A) RNA binding,	SM00526:H15,	Acetylation,Chromosome,Citrullination,Complete proteome,Direct protein sequencing,DNA-binding,Isopeptide bond,Methylation,Nucleus,Phosphoprotein,Polymorphism,Reference proteome,
HIST1H1E	histone cluster 1 H1 family member e(HIST1H1E)	GO:0003677~DNA binding,GO:0005515~protein binding,GO:0031490~chromatin DNA binding,GO:0044822~poly(A) RNA binding,	SM00526:H15,	3D-structure,Acetylation,Chromosome,Citrullination,Complete proteome,Direct protein sequencing,DNA-binding,Isopeptide bond,Methylation,Nucleus,Phosphoprotein,Polymorphism,Reference proteome,Ubl conjugation,
Hist1h2bf	histone cluster 1 H2B family member f(HIST1H2BF)	GO:0003677~DNA binding,GO:0005515~protein binding,GO:0046982~protein heterodimerization activity,	SM00427:H2B,	3D-structure,Acetylation,Antibiotic,Antimicrobial,Chromosome,Complete proteome,Direct protein sequencing,DNA-binding,Glycoprotein,Isopeptide bond,Methylation,Nucleosome core,Nucleus,Phosphoprotein,Polymorphism,Reference proteome,Ubl conjugation,
HIST2H2AC	histone cluster 2 H2A family member c(HIST2H2AC)	GO:0003677~DNA binding,GO:0046982~protein heterodimerization activity,	SM00414:H2A,	Acetylation,Chromosome,Citrullination,Complete proteome,DNA-binding,Isopeptide bond,Methylation,Nucleosome core,Nucleus,Phosphoprotein,Reference proteome,Ubl conjugation,
HDAC2	histone deacetylase 2(HDAC2)	GO:0000978~RNA polymerase II core promoter proximal region sequence-specific DNA binding,GO:0000980~RNA polymerase II distal enhancer sequence-specific DNA binding,GO:0001047~core promoter binding,GO:0001103~RNA polymerase II repressing transcription factor binding,GO:0003682~chromatin binding,GO:0004407~histone deacetylase activity,GO:0005515~protein binding,GO:0008134~transcription factor bindi…		3D-structure,Acetylation,Alternative splicing,Biological rhythms,Chromatin regulator,Complete proteome,Cytoplasm,Hydrolase,Isopeptide bond,Membrane,Nucleus,Phosphoprotein,Polymorphism,Proteomics identification,Reference proteome,Repressor,S-nitrosylation,Transcription,Transcription regulation,Transmembrane,Transmembrane helix,Ubl conjugation,
HOXC10	homeobox C10(HOXC10)	GO:0043565~sequence-specific DNA binding,	SM00389:HOX,	Complete proteome,Developmental protein,DNA-binding,Homeobox,Isopeptide bond,Nucleus,Phosphoprotein,Proteomics identification,Reference proteome,Transcription,Transcription regulation,Ubl conjugation,
ING2	inhibitor of growth family member 2(ING2)	GO:0003677~DNA binding,GO:0003682~chromatin binding,GO:0005515~protein binding,GO:0008270~zinc ion binding,GO:0032403~protein complex binding,GO:0035064~methylated histone binding,GO:0035091~phosphatidylinositol binding,	SM00249:PHD,SM01408:SM01408,	Alternative splicing,Chromatin regulator,Coiled coil,Complete proteome,Direct protein sequencing,Growth regulation,Isopeptide bond,Metal-binding,Nucleus,Proteomics identification,Reference proteome,Transcription,Transcription regulation,Ubl conjugation,Zinc,Zinc-finger,
ING3	inhibitor of growth family member 3(ING3)	GO:0004402~histone acetyltransferase activity,GO:0008270~zinc ion binding,GO:0035064~methylated histone binding,	SM00249:PHD,SM01408:SM01408,	3D-structure,Acetylation,Alternative splicing,Chromatin regulator,Complete proteome,Direct protein sequencing,Disease mutation,Growth regulation,Isopeptide bond,Metal-binding,Nucleus,Proteomics identification,Reference proteome,Transcription,Transcription regulation,Ubl conjugation,Zinc,Zinc-finger,
ING4	inhibitor of growth family member 4(ING4)	GO:0003713~transcription coactivator activity,GO:0005515~protein binding,GO:0008270~zinc ion binding,GO:0035064~methylated histone binding,	SM00249:PHD,SM01408:SM01408,	3D-structure,Acetylation,Alternative splicing,Apoptosis,Cell cycle,Chromatin regulator,Citrullination,Coiled coil,Complete proteome,Metal-binding,Nucleus,Proteomics identification,Reference proteome,Tumor suppressor,Zinc,Zinc-finger,
IMPDH2	inosine monophosphate dehydrogenase 2(IMPDH2)	GO:0000166~nucleotide binding,GO:0003677~DNA binding,GO:0003723~RNA binding,GO:0003824~catalytic activity,GO:0003938~IMP dehydrogenase activity,GO:0005515~protein binding,GO:0016491~oxidoreductase activity,GO:0046872~metal ion binding,	SM00116:CBS,	3D-structure,Acetylation,CBS domain,Complete proteome,Cytoplasm,Direct protein sequencing,DNA-binding,GMP biosynthesis,Metal-binding,NAD,Nucleus,Oxidoreductase,Phosphoprotein,Polymorphism,Potassium,Proteomics identification,Purine biosynthesis,Reference proteome,Repeat,RNA-binding,
ISG20	interferon stimulated exonuclease gene 20(ISG20)	GO:0000175~3'-5'-exoribonuclease activity,GO:0003676~nucleic acid binding,GO:0004527~exonuclease activity,GO:0008310~single-stranded DNA 3'-5' exodeoxyribonuclease activity,GO:0008859~exoribonuclease II activity,GO:0030619~U1 snRNA binding,GO:0030620~U2 snRNA binding,GO:0034511~U3 snoRNA binding,GO:0046872~metal ion binding,	SM00479:EXOIII,	3D-structure,Alternative splicing,Antiviral defense,Complete proteome,Cytoplasm,Exonuclease,Hydrolase,Immunity,Innate immunity,Manganese,Metal-binding,Nuclease,Nucleus,Proteomics identification,Reference proteome,RNA-binding,rRNA processing,
ILF3	interleukin enhancer binding factor 3(ILF3)	GO:0003677~DNA binding,GO:0003723~RNA binding,GO:0003725~double-stranded RNA binding,GO:0005515~protein binding,GO:0044822~poly(A) RNA binding,	SM00358:DSRM,SM00572:DZF,	3D-structure,Acetylation,Alternative splicing,Antiviral defense,Complete proteome,Cytoplasm,Direct protein sequencing,DNA-binding,Isopeptide bond,Methylation,Nucleus,Phosphoprotein,Polymorphism,Proteomics identification,Reference proteome,Repeat,RNA-binding,Transcription,Transcription regulation,Ubl conjugation,
KIF2C	kinesin family member 2C(KIF2C)	GO:0003777~microtubule motor activity,GO:0005515~protein binding,GO:0005524~ATP binding,GO:0016887~ATPase activity,GO:0019237~centromeric DNA binding,GO:0051010~microtubule plus-end binding,	SM00129:KISc,	3D-structure,Acetylation,Alternative splicing,ATP-binding,Cell cycle,Cell division,Centromere,Chromosome,Chromosome partition,Coiled coil,Complete proteome,Cytoplasm,Cytoskeleton,Kinetochore,Microtubule,Mitosis,Motor protein,Nucleotide-binding,Nucleus,Phosphoprotein,Polymorphism,Proteomics identification,Reference proteome,Ubl conjugation,
LMNA	lamin A/C(LMNA)	GO:0005198~structural molecule activity,GO:0005515~protein binding,	SM01391:SM01391,	3D-structure,Acetylation,Alternative splicing,Cardiomyopathy,Charcot-Marie-Tooth disease,Coiled coil,Complete proteome,Congenital muscular dystrophy,Direct protein sequencing,Disease mutation,Emery-Dreifuss muscular dystrophy,Intermediate filament,Isopeptide bond,Limb-girdle muscular dystrophy,Lipoprotein,Methylation,Neurodegeneration,Neuropathy,Nucleus,Phosphoprotein,Polymorphism,Prenylation,Pro…
LARS	leucyl-tRNA synthetase(LARS)	GO:0002161~aminoacyl-tRNA editing activity,GO:0004812~aminoacyl-tRNA ligase activity,GO:0004823~leucine-tRNA ligase activity,GO:0005515~protein binding,GO:0005524~ATP binding,		3D-structure,Acetylation,Alternative splicing,Aminoacyl-tRNA synthetase,ATP-binding,Complete proteome,Cytoplasm,Disease mutation,Ligase,Nucleotide-binding,Phosphoprotein,Polymorphism,Protein biosynthesis,Proteomics identification,Reference proteome,
KAT6B	lysine acetyltransferase 6B(KAT6B)	GO:0003677~DNA binding,GO:0004402~histone acetyltransferase activity,GO:0005515~protein binding,GO:0008134~transcription factor binding,GO:0008270~zinc ion binding,GO:0016407~acetyltransferase activity,GO:0032403~protein complex binding,	SM00249:PHD,SM00526:H15,	Acetylation,Activator,Acyltransferase,Alternative splicing,Chromatin regulator,Chromosomal rearrangement,Coiled coil,Complete proteome,Isopeptide bond,Metal-binding,Nucleus,Phosphoprotein,Polymorphism,Reference proteome,Repeat,Repressor,Transcription,Transcription regulation,Transferase,Ubl conjugation,Zinc,Zinc-finger,
KDM1A	lysine demethylase 1A(KDM1A)	GO:0001085~RNA polymerase II transcription factor binding,GO:0002039~p53 binding,GO:0003682~chromatin binding,GO:0003700~transcription factor activity, sequence-specific DNA binding,GO:0004407~histone deacetylase activity,GO:0005515~protein binding,GO:0008134~transcription factor binding,GO:0016491~oxidoreductase activity,GO:0019899~enzyme binding,GO:0030374~ligand-dependent nuclear receptor tran…		3D-structure,Alternative splicing,Chromatin regulator,Coiled coil,Complete proteome,Developmental protein,Direct protein sequencing,Disease mutation,FAD,Flavoprotein,Nucleus,Oxidoreductase,Phosphoprotein,Proteomics identification,Reference proteome,Repressor,Transcription,Transcription regulation,
LOX	lysyl oxidase(LOX)	GO:0004720~protein-lysine 6-oxidase activity,GO:0005507~copper ion binding,GO:0005515~protein binding,GO:0016641~oxidoreductase activity, acting on the CH-NH2 group of donors, oxygen as acceptor,		Complete proteome,Copper,Disulfide bond,Glycoprotein,LTQ,Metal-binding,Oxidoreductase,Polymorphism,Proteomics identification,Reference proteome,Secreted,Signal,TPQ,
MTF2	metal response element binding transcription factor 2(MTF2)	GO:0003677~DNA binding,GO:0008270~zinc ion binding,GO:0035064~methylated histone binding,	SM00249:PHD,SM00333:TUDOR,	Alternative splicing,Chromatin regulator,Complete proteome,DNA-binding,Metal-binding,Nucleus,Phosphoprotein,Polymorphism,Proteomics identification,Reference proteome,Repeat,Zinc,Zinc-finger,
METAP1	methionyl aminopeptidase 1(METAP1)	GO:0004177~aminopeptidase activity,GO:0008235~metalloexopeptidase activity,GO:0046872~metal ion binding,GO:0070006~metalloaminopeptidase activity,		3D-structure,Acetylation,Aminopeptidase,Complete proteome,Cytoplasm,Hydrolase,Metal-binding,Protease,Proteomics identification,Reference proteome,
MCM3	minichromosome maintenance complex component 3(MCM3)	GO:0003677~DNA binding,GO:0003678~DNA helicase activity,GO:0005515~protein binding,GO:0005524~ATP binding,	SM00350:MCM,SM00382:AAA,	Acetylation,Alternative splicing,ATP-binding,Cell cycle,Coiled coil,Complete proteome,Direct protein sequencing,DNA replication,DNA-binding,Glycoprotein,Helicase,Hydrolase,Nucleotide-binding,Nucleus,Phosphoprotein,Polymorphism,Proteomics identification,Reference proteome,
MCM5	minichromosome maintenance complex component 5(MCM5)	GO:0003678~DNA helicase activity,GO:0003682~chromatin binding,GO:0003688~DNA replication origin binding,GO:0005515~protein binding,GO:0005524~ATP binding,	SM00350:MCM,	Acetylation,ATP-binding,Cell cycle,Cell division,Complete proteome,DNA replication,DNA-binding,Helicase,Hydrolase,Nucleotide-binding,Nucleus,Phosphoprotein,Polymorphism,Proteomics identification,Reference proteome,
MORF4L2	mortality factor 4 like 2(MORF4L2)	GO:0005515~protein binding,		Chromatin regulator,Complete proteome,Direct protein sequencing,DNA damage,DNA repair,Growth regulation,Nucleus,Phosphoprotein,Proteomics identification,Reference proteome,Transcription,Transcription regulation,
MYEF2	myelin expression factor 2(MYEF2)	GO:0000166~nucleotide binding,GO:0003676~nucleic acid binding,GO:0003677~DNA binding,GO:0044822~poly(A) RNA binding,	SM00360:RRM,	Alternative splicing,Complete proteome,DNA-binding,Methylation,Nucleus,Phosphoprotein,Polymorphism,Proteomics identification,Reference proteome,Repeat,Repressor,RNA-binding,Transcription,
MEF2D	myocyte enhancer factor 2D(MEF2D)	GO:0000977~RNA polymerase II regulatory region sequence-specific DNA binding,GO:0000978~RNA polymerase II core promoter proximal region sequence-specific DNA binding,GO:0000981~RNA polymerase II transcription factor activity, sequence-specific DNA binding,GO:0001077~transcriptional activator activity, RNA polymerase II core promoter proximal region sequence-specific binding,GO:0003700~transcripti…	SM00432:MADS,	Acetylation,Activator,Alternative splicing,Apoptosis,Complete proteome,Developmental protein,Differentiation,DNA-binding,Isopeptide bond,Neurogenesis,Nucleus,Phosphoprotein,Proteomics identification,Reference proteome,Transcription,Transcription regulation,Ubl conjugation,
MYH10	myosin heavy chain 10(MYH10)	GO:0000146~microfilament motor activity,GO:0003774~motor activity,GO:0003779~actin binding,GO:0005515~protein binding,GO:0005516~calmodulin binding,GO:0005524~ATP binding,GO:0030898~actin-dependent ATPase activity,GO:0043531~ADP binding,GO:0051015~actin filament binding,	SM00015:IQ,SM00242:MYSc,	3D-structure,Acetylation,Actin-binding,Alternative splicing,ATP-binding,Calmodulin-binding,Cell adhesion,Cell projection,Cell shape,Coiled coil,Complete proteome,Methylation,Motor protein,Myosin,Nucleotide-binding,Phosphoprotein,Proteomics identification,Reference proteome,
MYH9	myosin heavy chain 9(MYH9)	GO:0000146~microfilament motor activity,GO:0003774~motor activity,GO:0003779~actin binding,GO:0005515~protein binding,GO:0005516~calmodulin binding,GO:0005524~ATP binding,GO:0016887~ATPase activity,GO:0019904~protein domain specific binding,GO:0030898~actin-dependent ATPase activity,GO:0042803~protein homodimerization activity,GO:0043495~protein anchor,GO:0043531~ADP binding,GO:0044822~poly(A) RN…	SM00015:IQ,SM00242:MYSc,	3D-structure,Acetylation,Actin-binding,Alport syndrome,Alternative splicing,ATP-binding,Calmodulin-binding,Cataract,Cell adhesion,Cell shape,Coiled coil,Complete proteome,Cytoplasm,Cytoskeleton,Deafness,Direct protein sequencing,Disease mutation,Motor protein,Myosin,Non-syndromic deafness,Nucleotide-binding,Phosphoprotein,Polymorphism,Proteomics identification,Reference proteome,Ubl conjugation,
NF1	neurofibromin 1(NF1)	GO:0005096~GTPase activator activity,GO:0005515~protein binding,GO:0008429~phosphatidylethanolamine binding,GO:0031210~phosphatidylcholine binding,	SM00323:RasGAP,SM00516:SEC14,	3D-structure,Acetylation,Alternative splicing,Complete proteome,Disease mutation,GTPase activation,Lipid-binding,Nucleus,Phosphoprotein,Polymorphism,Proteomics identification,Reference proteome,RNA editing,Tumor suppressor,
NBN	nibrin(NBN)	GO:0003684~damaged DNA binding,GO:0004003~ATP-dependent DNA helicase activity,GO:0005515~protein binding,GO:0008134~transcription factor binding,GO:0047485~protein N-terminus binding,	SM00240:FHA,SM01348:SM01348,	Cell cycle,Chromosome,Complete proteome,Direct protein sequencing,Disease mutation,DNA damage,DNA repair,Meiosis,Nucleus,Phosphoprotein,Polymorphism,Proteomics identification,Reference proteome,Telomere,
NOSIP	nitric oxide synthase interacting protein(NOSIP)	GO:0004842~ubiquitin-protein transferase activity,GO:0005515~protein binding,GO:0016874~ligase activity,GO:0044822~poly(A) RNA binding,GO:0061630~ubiquitin protein ligase activity,		Complete proteome,Cytoplasm,Developmental protein,Ligase,Nucleus,Phosphoprotein,Polymorphism,Proteomics identification,Reference proteome,Ubl conjugation pathway,
NONO	non-POU domain containing, octamer-binding(NONO)	GO:0000166~nucleotide binding,GO:0000976~transcription regulatory region sequence-specific DNA binding,GO:0000980~RNA polymerase II distal enhancer sequence-specific DNA binding,GO:0001047~core promoter binding,GO:0003676~nucleic acid binding,GO:0003682~chromatin binding,GO:0005515~protein binding,GO:0042802~identical protein binding,GO:0044822~poly(A) RNA binding,	SM00360:RRM,	3D-structure,Acetylation,Activator,Alternative splicing,Biological rhythms,Chromosomal rearrangement,Coiled coil,Complete proteome,Direct protein sequencing,DNA damage,DNA recombination,DNA repair,DNA-binding,Isopeptide bond,Mental retardation,Methylation,mRNA processing,mRNA splicing,Nucleus,Phosphoprotein,Proteomics identification,Reference proteome,Repeat,Repressor,RNA-binding,Transcription,Tr…
NXF1	nuclear RNA export factor 1(NXF1)	GO:0000166~nucleotide binding,GO:0003723~RNA binding,GO:0003727~single-stranded RNA binding,GO:0003729~mRNA binding,GO:0005487~nucleocytoplasmic transporter activity,GO:0005515~protein binding,GO:0044822~poly(A) RNA binding,	SM00804:TAP_C,	3D-structure,Acetylation,Alternative splicing,Complete proteome,Cytoplasm,Host-virus interaction,Leucine-rich repeat,Methylation,mRNA transport,Nitration,Nucleus,Phosphoprotein,Proteomics identification,Reference proteome,Repeat,RNA-binding,Transport,
NEMF	nuclear export mediator factor(NEMF)			3D-structure,Alternative splicing,Coiled coil,Complete proteome,Nucleus,Phosphoprotein,Polymorphism,Proteomics identification,Reference proteome,
NFIC	nuclear factor I C(NFIC)	GO:0000978~RNA polymerase II core promoter proximal region sequence-specific DNA binding,GO:0001077~transcriptional activator activity, RNA polymerase II core promoter proximal region sequence-specific binding,GO:0003677~DNA binding,GO:0003700~transcription factor activity, sequence-specific DNA binding,	SM00523:DWA,	Acetylation,Activator,Alternative splicing,Complete proteome,Direct protein sequencing,DNA replication,DNA-binding,Methylation,Nucleus,Phosphoprotein,Polymorphism,Reference proteome,Transcription,Transcription regulation,
NFAT5	nuclear factor of activated T-cells 5(NFAT5)	GO:0000978~RNA polymerase II core promoter proximal region sequence-specific DNA binding,GO:0001077~transcriptional activator activity, RNA polymerase II core promoter proximal region sequence-specific binding,GO:0003700~transcription factor activity, sequence-specific DNA binding,GO:0005515~protein binding,	SM00429:IPT,	3D-structure,Acetylation,Activator,Alternative splicing,Complete proteome,Cytoplasm,DNA-binding,Isopeptide bond,Membrane,Nucleus,Phosphoprotein,Proteomics identification,Reference proteome,Transcription,Transcription regulation,Transmembrane,Transmembrane helix,Ubl conjugation,
NSD1	nuclear receptor binding SET domain protein 1(NSD1)	GO:0000979~RNA polymerase II core promoter sequence-specific DNA binding,GO:0003682~chromatin binding,GO:0003712~transcription cofactor activity,GO:0003714~transcription corepressor activity,GO:0008270~zinc ion binding,GO:0018024~histone-lysine N-methyltransferase activity,GO:0030331~estrogen receptor binding,GO:0042799~histone methyltransferase activity (H4-K20 specific),GO:0042974~retinoic acid…	SM00249:PHD,SM00293:PWWP,SM00317:SET,SM00508:PostSET,SM00570:AWS,	3D-structure,Activator,Alternative splicing,Chromatin regulator,Chromosomal rearrangement,Chromosome,Coiled coil,Complete proteome,Disease mutation,Isopeptide bond,Metal-binding,Methyltransferase,Nucleus,Phosphoprotein,Polymorphism,Proteomics identification,Proto-oncogene,Receptor,Reference proteome,Repeat,Repressor,S-adenosyl-L-methionine,Transcription,Transcription regulation,Transferase,Ubl co…
NCOA3	nuclear receptor coactivator 3(NCOA3)	GO:0003713~transcription coactivator activity,GO:0004402~histone acetyltransferase activity,GO:0005515~protein binding,GO:0016922~ligand-dependent nuclear receptor binding,GO:0030374~ligand-dependent nuclear receptor transcription coactivator activity,GO:0035257~nuclear hormone receptor binding,GO:0046966~thyroid hormone receptor binding,GO:0046983~protein dimerization activity,GO:0047485~protein…	SM00091:PAS,SM00353:HLH,SM01151:SM01151,	3D-structure,Acetylation,Activator,Acyltransferase,Alternative splicing,Coiled coil,Complete proteome,Cytoplasm,Methylation,Nucleus,Phosphoprotein,Polymorphism,Receptor,Reference proteome,Repeat,Transcription,Transcription regulation,Transferase,
NCL	nucleolin(NCL)	GO:0000166~nucleotide binding,GO:0003676~nucleic acid binding,GO:0003723~RNA binding,GO:0005515~protein binding,GO:0008022~protein C-terminus binding,GO:0042162~telomeric DNA binding,GO:0042802~identical protein binding,GO:0044822~poly(A) RNA binding,	SM00360:RRM,SM00361:RRM_1,	3D-structure,Acetylation,Complete proteome,Cytoplasm,Direct protein sequencing,DNA-binding,Isopeptide bond,Methylation,Nucleus,Phosphoprotein,Polymorphism,Proteomics identification,Reference proteome,Repeat,RNA-binding,Ubl conjugation,
NPM1	nucleophosmin(NPM1)	GO:0003676~nucleic acid binding,GO:0003677~DNA binding,GO:0003713~transcription coactivator activity,GO:0003723~RNA binding,GO:0004860~protein kinase inhibitor activity,GO:0005515~protein binding,GO:0005547~phosphatidylinositol-3,4,5-trisphosphate binding,GO:0019901~protein kinase binding,GO:0030957~Tat protein binding,GO:0042393~histone binding,GO:0042803~protein homodimerization activity,GO:004…		3D-structure,Acetylation,ADP-ribosylation,Alternative splicing,Chaperone,Chromosomal rearrangement,Complete proteome,Cytoplasm,Cytoskeleton,Direct protein sequencing,Disulfide bond,Host-virus interaction,Isopeptide bond,Nucleus,Phosphoprotein,Proteomics identification,Proto-oncogene,Reference proteome,RNA-binding,Ubl conjugation,
NAP1L1	nucleosome assembly protein 1 like 1(NAP1L1)	GO:0005515~protein binding,GO:0044822~poly(A) RNA binding,		Acetylation,Alternative splicing,Coiled coil,Complete proteome,Lipoprotein,Methylation,Nucleus,Phosphoprotein,Prenylation,Proteomics identification,Reference proteome,
NACC1	nucleus accumbens associated 1(NACC1)		SM00225:BTB,SM01025:SM01025,	3D-structure,Complete proteome,Cytoplasm,Isopeptide bond,Nucleus,Phosphoprotein,Proteomics identification,Reference proteome,Repressor,Transcription,Transcription regulation,Ubl conjugation,
PSPC1	paraspeckle component 1(PSPC1)	GO:0000166~nucleotide binding,GO:0000976~transcription regulatory region sequence-specific DNA binding,GO:0001047~core promoter binding,GO:0003676~nucleic acid binding,GO:0005515~protein binding,GO:0044822~poly(A) RNA binding,	SM00360:RRM,	3D-structure,Acetylation,Activator,Alternative splicing,Biological rhythms,Coiled coil,Complete proteome,Cytoplasm,Direct protein sequencing,Methylation,Nucleus,Phosphoprotein,Proteomics identification,Reference proteome,Repeat,Repressor,RNA-binding,Transcription,Transcription regulation,
PPIB	peptidylprolyl isomerase B(PPIB)	GO:0003755~peptidyl-prolyl cis-trans isomerase activity,GO:0005515~protein binding,GO:0005518~collagen binding,GO:0032403~protein complex binding,GO:0042277~peptide binding,GO:0044822~poly(A) RNA binding,GO:0051082~unfolded protein binding,GO:0070063~RNA polymerase binding,		3D-structure,Acetylation,Complete proteome,Cyclosporin,Direct protein sequencing,Disease mutation,Dwarfism,Endoplasmic reticulum,Glycoprotein,Isomerase,Osteogenesis imperfecta,Polymorphism,Reference proteome,Rotamase,Signal,
ppwd1	peptidylprolyl isomerase domain and WD repeat containing 1(PPWD1)	GO:0003755~peptidyl-prolyl cis-trans isomerase activity,	SM00320:WD40,	3D-structure,Acetylation,Alternative splicing,Complete proteome,Isomerase,mRNA processing,mRNA splicing,Nucleus,Proteomics identification,Reference proteome,Repeat,Rotamase,Spliceosome,WD repeat,
PICALM	phosphatidylinositol binding clathrin assembly protein(PICALM)	GO:0005515~protein binding,GO:0005545~1-phosphatidylinositol binding,GO:0030276~clathrin binding,GO:0032050~clathrin heavy chain binding,GO:0035615~clathrin adaptor activity,GO:0098641~cadherin binding involved in cell-cell adhesion,	SM00273:ENTH,	Acetylation,Alternative splicing,Chromosomal rearrangement,Coated pit,Coiled coil,Complete proteome,Cytoplasmic vesicle,Endocytosis,Golgi apparatus,Isopeptide bond,Membrane,Nucleus,Phosphoprotein,Polymorphism,Proteomics identification,Proto-oncogene,Reference proteome,Ubl conjugation,
PISD	phosphatidylserine decarboxylase(PISD)	GO:0004609~phosphatidylserine decarboxylase activity,		Alternative splicing,Complete proteome,Decarboxylase,Lipid biosynthesis,Lipid metabolism,Lyase,Membrane,Mitochondrion,Mitochondrion inner membrane,Phospholipid biosynthesis,Phospholipid metabolism,Proteomics identification,Pyruvate,Reference proteome,Transit peptide,Transmembrane,Transmembrane helix,Zymogen,
PKP2	plakophilin 2(PKP2)	GO:0005080~protein kinase C binding,GO:0005515~protein binding,GO:0017080~sodium channel regulator activity,GO:0019215~intermediate filament binding,GO:0032947~protein complex scaffold,GO:0044325~ion channel binding,GO:0045294~alpha-catenin binding,GO:0086083~cell adhesive protein binding involved in bundle of His cell-Purkinje myocyte communication,GO:0098641~cadherin binding involved in cell-ce…	SM00185:ARM,	3D-structure,Alternative splicing,Cardiomyopathy,Cell adhesion,Cell junction,Complete proteome,Disease mutation,Methylation,Nucleus,Phosphoprotein,Polymorphism,Proteomics identification,Reference proteome,Repeat,
PKP3	plakophilin 3(PKP3)	GO:0045294~alpha-catenin binding,GO:0050839~cell adhesion molecule binding,GO:0098641~cadherin binding involved in cell-cell adhesion,	SM00185:ARM,	Alternative promoter usage,Cell adhesion,Cell junction,Complete proteome,Methylation,Nucleus,Phosphoprotein,Proteomics identification,Reference proteome,Repeat,
PLEKHA2	pleckstrin homology domain containing A2(PLEKHA2)	GO:0001968~fibronectin binding,GO:0005515~protein binding,GO:0005545~1-phosphatidylinositol binding,GO:0030165~PDZ domain binding,GO:0035091~phosphatidylinositol binding,GO:0043236~laminin binding,	SM00233:PH,	Cell membrane,Complete proteome,Cytoplasm,Isopeptide bond,Lipid-binding,Membrane,Nucleus,Phosphoprotein,Polymorphism,Proteomics identification,Reference proteome,Repeat,Ubl conjugation,
PLK1	polo like kinase 1(PLK1)	GO:0004672~protein kinase activity,GO:0004674~protein serine/threonine kinase activity,GO:0005515~protein binding,GO:0005524~ATP binding,GO:0008017~microtubule binding,GO:0010997~anaphase-promoting complex binding,GO:0016301~kinase activity,GO:0019901~protein kinase binding,	SM00220:S_TKc,	3D-structure,Acetylation,ATP-binding,Cell cycle,Cell division,Centromere,Chromosome,Complete proteome,Cytoplasm,Cytoskeleton,Isopeptide bond,Kinase,Kinetochore,Mitosis,Nucleotide-binding,Nucleus,Phosphoprotein,Polymorphism,Proteomics identification,Reference proteome,Repeat,Serine/threonine-protein kinase,Transferase,Ubl conjugation,
PARP1	poly(ADP-ribose) polymerase 1(PARP1)	GO:0003677~DNA binding,GO:0003910~DNA ligase (ATP) activity,GO:0003950~NAD+ ADP-ribosyltransferase activity,GO:0005515~protein binding,GO:0008134~transcription factor binding,GO:0008270~zinc ion binding,GO:0019899~enzyme binding,GO:0019901~protein kinase binding,GO:0030331~estrogen receptor binding,GO:0042802~identical protein binding,GO:0042826~histone deacetylase binding,GO:0044822~poly(A) RNA …	SM00292:BRCT,SM00773:WGR,SM01335:SM01335,SM01336:SM01336,	3D-structure,Acetylation,ADP-ribosylation,Coiled coil,Complete proteome,Direct protein sequencing,DNA damage,DNA repair,DNA-binding,Glycosyltransferase,Isopeptide bond,Metal-binding,NAD,Nucleus,Phosphoprotein,Polymorphism,Proteomics identification,Reference proteome,Repeat,Transcription,Transcription regulation,Transferase,Ubl conjugation,Zinc,Zinc-finger,
PCBP2	poly(rC) binding protein 2(PCBP2)	GO:0003723~RNA binding,GO:0005515~protein binding,GO:0019899~enzyme binding,GO:0031625~ubiquitin protein ligase binding,GO:0044822~poly(A) RNA binding,GO:1990829~C-rich single-stranded DNA binding,	SM00322:KH,	3D-structure,Alternative splicing,Antiviral defense,Complete proteome,Cytoplasm,Direct protein sequencing,DNA-binding,Immunity,Innate immunity,Nucleus,Phosphoprotein,Proteomics identification,Reference proteome,Repeat,Ribonucleoprotein,RNA-binding,Viral RNA replication,
PNKP	polynucleotide kinase 3'-phosphatase(PNKP)	GO:0003684~damaged DNA binding,GO:0003690~double-stranded DNA binding,GO:0004519~endonuclease activity,GO:0005515~protein binding,GO:0005524~ATP binding,GO:0017076~purine nucleotide binding,GO:0019201~nucleotide kinase activity,GO:0046403~polynucleotide 3'-phosphatase activity,GO:0046404~ATP-dependent polydeoxyribonucleotide 5'-hydroxyl-kinase activity,		3D-structure,Acetylation,Alternative splicing,ATP-binding,Complete proteome,Direct protein sequencing,Disease mutation,DNA damage,DNA repair,Epilepsy,Hydrolase,Kinase,Mental retardation,Multifunctional enzyme,Neurodegeneration,Nucleotide-binding,Nucleus,Phosphoprotein,Polymorphism,Primary microcephaly,Proteomics identification,Reference proteome,Transferase,
PRPF4	pre-mRNA processing factor 4(PRPF4)	GO:0005515~protein binding,GO:0017070~U6 snRNA binding,GO:0030621~U4 snRNA binding,	SM00320:WD40,SM00500:SFM,	3D-structure,Acetylation,Alternative splicing,Complete proteome,Direct protein sequencing,Disease mutation,mRNA processing,mRNA splicing,Nucleus,Reference proteome,Repeat,Retinitis pigmentosa,Spliceosome,WD repeat,
PRPF8	pre-mRNA processing factor 8(PRPF8)	GO:0000386~second spliceosomal transesterification activity,GO:0003723~RNA binding,GO:0005515~protein binding,GO:0017070~U6 snRNA binding,GO:0030619~U1 snRNA binding,GO:0030620~U2 snRNA binding,GO:0030623~U5 snRNA binding,GO:0044822~poly(A) RNA binding,GO:0070530~K63-linked polyubiquitin binding,GO:0097157~pre-mRNA intronic binding,	SM00232:JAB_MPN,	3D-structure,Acetylation,Complete proteome,Direct protein sequencing,Disease mutation,Methylation,mRNA processing,mRNA splicing,Nucleus,Phosphoprotein,Polymorphism,Proteomics identification,Reference proteome,Retinitis pigmentosa,Ribonucleoprotein,RNA-binding,Spliceosome,
PA2G4	proliferation-associated 2G4(PA2G4)	GO:0003677~DNA binding,GO:0003700~transcription factor activity, sequence-specific DNA binding,GO:0005515~protein binding,GO:0031625~ubiquitin protein ligase binding,GO:0044822~poly(A) RNA binding,		3D-structure,Acetylation,Alternative splicing,Complete proteome,Cytoplasm,Direct protein sequencing,Nucleus,Phosphoprotein,Proteomics identification,Reference proteome,Repressor,Ribonucleoprotein,RNA-binding,rRNA processing,Signal,Transcription,Transcription regulation,Translation regulation,Ubl conjugation,
PSMD1	proteasome 26S subunit, non-ATPase 1(PSMD1)	GO:0004175~endopeptidase activity,GO:0030234~enzyme regulator activity,		3D-structure,Acetylation,Alternative splicing,Coiled coil,Complete proteome,Membrane,Phosphoprotein,Proteasome,Proteomics identification,Reference proteome,Repeat,Transmembrane,Transmembrane helix,
PPP1CA	protein phosphatase 1 catalytic subunit alpha(PPP1CA)	GO:0004721~phosphoprotein phosphatase activity,GO:0004722~protein serine/threonine phosphatase activity,GO:0005515~protein binding,GO:0008157~protein phosphatase 1 binding,GO:0016791~phosphatase activity,GO:0032403~protein complex binding,GO:0043021~ribonucleoprotein complex binding,GO:0046872~metal ion binding,	SM00156:PP2Ac,	3D-structure,Acetylation,Alternative splicing,Carbohydrate metabolism,Cell cycle,Cell division,Complete proteome,Cytoplasm,Direct protein sequencing,Glycogen metabolism,Hydrolase,Manganese,Metal-binding,Nucleus,Phosphoprotein,Protein phosphatase,Proteomics identification,Reference proteome,
PPP1CB	protein phosphatase 1 catalytic subunit beta(PPP1CB)	GO:0004721~phosphoprotein phosphatase activity,GO:0004722~protein serine/threonine phosphatase activity,GO:0005515~protein binding,GO:0016787~hydrolase activity,GO:0016791~phosphatase activity,GO:0017018~myosin phosphatase activity,GO:0019901~protein kinase binding,GO:0046872~metal ion binding,GO:0050115~myosin-light-chain-phosphatase activity,	SM00156:PP2Ac,	Acetylation,Biological rhythms,Carbohydrate metabolism,Cell cycle,Cell division,Complete proteome,Cytoplasm,Direct protein sequencing,Disease mutation,Glycogen metabolism,Hydrolase,Manganese,Metal-binding,Nucleus,Phosphoprotein,Protein phosphatase,Proteomics identification,Reference proteome,
PPP1CC	protein phosphatase 1 catalytic subunit gamma(PPP1CC)	GO:0004721~phosphoprotein phosphatase activity,GO:0004722~protein serine/threonine phosphatase activity,GO:0005515~protein binding,GO:0005521~lamin binding,GO:0008022~protein C-terminus binding,GO:0008157~protein phosphatase 1 binding,GO:0016787~hydrolase activity,GO:0016791~phosphatase activity,GO:0019901~protein kinase binding,GO:0019904~protein domain specific binding,GO:0032403~protein comple…	SM00156:PP2Ac,	3D-structure,Acetylation,Alternative splicing,Biological rhythms,Carbohydrate metabolism,Cell cycle,Cell division,Centromere,Chromosome,Complete proteome,Cytoplasm,Direct protein sequencing,Disulfide bond,Glycogen metabolism,Hydrolase,Kinetochore,Manganese,Metal-binding,Mitochondrion,Nucleus,Phosphoprotein,Polymorphism,Protein phosphatase,Proteomics identification,Reference proteome,Signal,
PPP1R10	protein phosphatase 1 regulatory subunit 10(PPP1R10)	GO:0003677~DNA binding,GO:0004864~protein phosphatase inhibitor activity,GO:0044822~poly(A) RNA binding,GO:0046872~metal ion binding,	SM00356:ZnF_C3H1,SM00509:TFS2N,	Complete proteome,Direct protein sequencing,DNA-binding,Metal-binding,Methylation,Nucleus,Phosphoprotein,Polymorphism,Protein phosphatase inhibitor,Reference proteome,RNA-binding,Zinc,Zinc-finger,
PPP1R13L	protein phosphatase 1 regulatory subunit 13 like(PPP1R13L)	GO:0003714~transcription corepressor activity,GO:0005515~protein binding,GO:0008134~transcription factor binding,GO:0042802~identical protein binding,GO:0098641~cadherin binding involved in cell-cell adhesion,	SM00248:ANK,SM00326:SH3,	3D-structure,Acetylation,ANK repeat,Apoptosis,Complete proteome,Cytoplasm,Methylation,Nucleus,Phosphoprotein,Proteomics identification,Reference proteome,Repeat,Repressor,SH3 domain,Transcription,Transcription regulation,
PPP1R8	protein phosphatase 1 regulatory subunit 8(PPP1R8)	GO:0003677~DNA binding,GO:0003723~RNA binding,GO:0003729~mRNA binding,GO:0004519~endonuclease activity,GO:0004865~protein serine/threonine phosphatase inhibitor activity,GO:0005515~protein binding,GO:0008599~protein phosphatase type 1 regulator activity,GO:0008995~ribonuclease E activity,	SM00240:FHA,	3D-structure,Alternative splicing,Complete proteome,Cytoplasm,DNA-binding,Endonuclease,Hydrolase,Magnesium,mRNA processing,mRNA splicing,Nuclease,Nucleus,Phosphoprotein,Protein phosphatase inhibitor,Proteomics identification,Reference proteome,Repeat,Repressor,RNA-binding,Spliceosome,Transcription,Transcription regulation,
PTPMT1	protein tyrosine phosphatase, mitochondrial 1(PTPMT1)	GO:0004439~phosphatidylinositol-4,5-bisphosphate 5-phosphatase activity,GO:0004725~protein tyrosine phosphatase activity,GO:0005515~protein binding,GO:0008138~protein tyrosine/serine/threonine phosphatase activity,GO:0008962~phosphatidylglycerophosphatase activity,	SM00195:DSPc,	Alternative splicing,Complete proteome,Hydrolase,Lipid biosynthesis,Lipid metabolism,Membrane,Mitochondrion,Mitochondrion inner membrane,Phospholipid biosynthesis,Phospholipid metabolism,Protein phosphatase,Proteomics identification,Reference proteome,Transit peptide,
PTPN11	protein tyrosine phosphatase, non-receptor type 11(PTPN11)	GO:0004721~phosphoprotein phosphatase activity,GO:0004725~protein tyrosine phosphatase activity,GO:0004726~non-membrane spanning protein tyrosine phosphatase activity,GO:0005070~SH3/SH2 adaptor activity,GO:0005158~insulin receptor binding,GO:0005515~protein binding,GO:0016303~1-phosphatidylinositol-3-kinase activity,GO:0019904~protein domain specific binding,GO:0030971~receptor tyrosine kinase bi…	SM00194:PTPc,SM00252:SH2,SM00404:PTPc_motif,	3D-structure,Acetylation,Alternative splicing,Complete proteome,Cytoplasm,Deafness,Disease mutation,Hydrolase,Nucleus,Phosphoprotein,Protein phosphatase,Proteomics identification,Reference proteome,Repeat,SH2 domain,
PTPN6	protein tyrosine phosphatase, non-receptor type 6(PTPN6)	GO:0001784~phosphotyrosine binding,GO:0004725~protein tyrosine phosphatase activity,GO:0005001~transmembrane receptor protein tyrosine phosphatase activity,GO:0005515~protein binding,GO:0017124~SH3 domain binding,GO:0019901~protein kinase binding,GO:0042169~SH2 domain binding,GO:0050839~cell adhesion molecule binding,	SM00194:PTPc,SM00252:SH2,SM00404:PTPc_motif,	3D-structure,Alternative splicing,Complete proteome,Cytoplasm,Hydrolase,Nucleus,Phosphoprotein,Protein phosphatase,Proteomics identification,Receptor,Reference proteome,Repeat,SH2 domain,
PURA	purine rich element binding protein A(PURA)	GO:0000900~translation repressor activity, nucleic acid binding,GO:0003691~double-stranded telomeric DNA binding,GO:0003697~single-stranded DNA binding,GO:0003700~transcription factor activity, sequence-specific DNA binding,GO:0003705~transcription factor activity, RNA polymerase II distal enhancer sequence-specific binding,GO:0003723~RNA binding,GO:0005515~protein binding,GO:0008134~transcriptio…	SM00712:PUR,	Acetylation,Activator,Coiled coil,Complete proteome,Disease mutation,DNA-binding,Mental retardation,Nucleus,Phosphoprotein,Reference proteome,Transcription,Transcription regulation,
PDHA1	pyruvate dehydrogenase (lipoamide) alpha 1(PDHA1)	GO:0004738~pyruvate dehydrogenase activity,GO:0004739~pyruvate dehydrogenase (acetyl-transferring) activity,GO:0016624~oxidoreductase activity, acting on the aldehyde or oxo group of donors, disulfide as acceptor,GO:0034604~pyruvate dehydrogenase (NAD+) activity,		3D-structure,Acetylation,Alternative splicing,Carbohydrate metabolism,Complete proteome,Direct protein sequencing,Disease mutation,Glucose metabolism,Leigh syndrome,Mitochondrion,Oxidoreductase,Phosphoprotein,Polymorphism,Proteomics identification,Pyruvate,Reference proteome,Thiamine pyrophosphate,Transit peptide,Tricarboxylic acid cycle,
PDHB	pyruvate dehydrogenase (lipoamide) beta(PDHB)	GO:0004738~pyruvate dehydrogenase activity,GO:0004739~pyruvate dehydrogenase (acetyl-transferring) activity,GO:0005515~protein binding,GO:0034604~pyruvate dehydrogenase (NAD+) activity,	SM00861:SM00861,	3D-structure,Acetylation,Alternative splicing,Carbohydrate metabolism,Complete proteome,Direct protein sequencing,Disease mutation,Glucose metabolism,Mitochondrion,Oxidoreductase,Phosphoprotein,Polymorphism,Proteomics identification,Pyruvate,Reference proteome,Thiamine pyrophosphate,Transit peptide,Tricarboxylic acid cycle,
RREB1	ras responsive element binding protein 1(RREB1)	GO:0000979~RNA polymerase II core promoter sequence-specific DNA binding,GO:0003676~nucleic acid binding,GO:0003700~transcription factor activity, sequence-specific DNA binding,GO:0046872~metal ion binding,	SM00355:ZnF_C2H2,	Activator,Alternative splicing,Complete proteome,DNA-binding,Isopeptide bond,Metal-binding,Nucleus,Phosphoprotein,Polymorphism,Proteomics identification,Reference proteome,Repeat,Repressor,Transcription,Transcription regulation,Ubl conjugation,Zinc,Zinc-finger,
RAC1	ras-related C3 botulinum toxin substrate 1 (rho family, small GTP binding protein Rac1)(RAC1)	GO:0003924~GTPase activity,GO:0005515~protein binding,GO:0005525~GTP binding,GO:0017137~Rab GTPase binding,GO:0019899~enzyme binding,GO:0019901~protein kinase binding,GO:0030742~GTP-dependent protein binding,GO:0031996~thioesterase binding,GO:0042826~histone deacetylase binding,GO:0051022~Rho GDP-dissociation inhibitor binding,		3D-structure,ADP-ribosylation,Alternative splicing,Cell membrane,Complete proteome,Cytoplasm,Glycoprotein,GTP-binding,Isopeptide bond,Lipoprotein,Membrane,Methylation,Nucleotide-binding,Phosphoprotein,Polymorphism,Prenylation,Reference proteome,Ubl conjugation,
RACK1	receptor for activated C kinase 1(RACK1)	GO:0005080~protein kinase C binding,GO:0005102~receptor binding,GO:0005515~protein binding,GO:0008200~ion channel inhibitor activity,GO:0008656~cysteine-type endopeptidase activator activity involved in apoptotic process,GO:0019899~enzyme binding,GO:0019903~protein phosphatase binding,GO:0030292~protein tyrosine kinase inhibitor activity,GO:0030971~receptor tyrosine kinase binding,GO:0032947~prot…	SM00320:WD40,	3D-structure,Acetylation,Apoptosis,Biological rhythms,Cell cycle,Cell membrane,Cell projection,Complete proteome,Cytoplasm,Developmental protein,Direct protein sequencing,Gastrulation,Growth regulation,Host-virus interaction,Membrane,Nucleus,Phosphoprotein,Proteomics identification,Reference proteome,Repeat,Translation regulation,WD repeat,
RPRD1B	regulation of nuclear pre-mRNA domain containing 1B(RPRD1B)	GO:0000993~RNA polymerase II core binding,GO:0005515~protein binding,	SM00582:RPR,	3D-structure,Acetylation,Coiled coil,Complete proteome,Nucleus,Phosphoprotein,Proteomics identification,Reference proteome,Transcription,Transcription regulation,
RCC1	regulator of chromosome condensation 1(RCC1)	GO:0003682~chromatin binding,GO:0005087~Ran guanyl-nucleotide exchange factor activity,GO:0005515~protein binding,GO:0031492~nucleosomal DNA binding,GO:0042393~histone binding,		3D-structure,Alternative splicing,Cell cycle,Cell division,Complete proteome,Cytoplasm,Direct protein sequencing,DNA-binding,Guanine-nucleotide releasing factor,Methylation,Mitosis,Nucleus,Phosphoprotein,Proteomics identification,Reference proteome,Repeat,
RCC2	regulator of chromosome condensation 2(RCC2)	GO:0005515~protein binding,GO:0008017~microtubule binding,GO:0019901~protein kinase binding,GO:0019904~protein domain specific binding,GO:0031267~small GTPase binding,GO:0044822~poly(A) RNA binding,GO:0048365~Rac GTPase binding,		Acetylation,Cell cycle,Cell division,Centromere,Chromosome,Complete proteome,Cytoplasm,Cytoskeleton,Microtubule,Mitosis,Nucleus,Phosphoprotein,Reference proteome,Repeat,
RPA1	replication protein A1(RPA1)	GO:0003677~DNA binding,GO:0003684~damaged DNA binding,GO:0003697~single-stranded DNA binding,GO:0005515~protein binding,GO:0046872~metal ion binding,		3D-structure,Acetylation,Complete proteome,Direct protein sequencing,DNA damage,DNA recombination,DNA repair,DNA replication,DNA-binding,Isopeptide bond,Metal-binding,Nucleus,Phosphoprotein,Polymorphism,Proteomics identification,Reference proteome,Ubl conjugation,Zinc,Zinc-finger,
RDH14	retinol dehydrogenase 14 (all-trans/9-cis/11-cis)(RDH14)	GO:0008106~alcohol dehydrogenase (NADP+) activity,GO:0016491~oxidoreductase activity,GO:0052650~NADP-retinol dehydrogenase activity,		Complete proteome,NADP,Oxidoreductase,Phosphoprotein,Reference proteome,
RNASEH2B	ribonuclease H2 subunit B(RNASEH2B)	GO:0004523~RNA-DNA hybrid ribonuclease activity,		3D-structure,Acetylation,Aicardi-Goutieres syndrome,Alternative splicing,Complete proteome,Disease mutation,Nucleus,Phosphoprotein,Proteomics identification,Reference proteome,
RAVER1	ribonucleoprotein, PTB binding 1(RAVER1)	GO:0000166~nucleotide binding,GO:0003676~nucleic acid binding,GO:0044822~poly(A) RNA binding,	SM00360:RRM,	3D-structure,Acetylation,Alternative splicing,Complete proteome,Cytoplasm,Nucleus,Phosphoprotein,Proteomics identification,Reference proteome,Repeat,RNA-binding,
RPL13	ribosomal protein L13(RPL13)	GO:0003723~RNA binding,GO:0003735~structural constituent of ribosome,GO:0005515~protein binding,GO:0044822~poly(A) RNA binding,		3D-structure,Acetylation,Alternative splicing,Complete proteome,Isopeptide bond,Phosphoprotein,Polymorphism,Proteomics identification,Reference proteome,Ribonucleoprotein,Ribosomal protein,Ubl conjugation,
RPL13A	ribosomal protein L13a(RPL13A)	GO:0003729~mRNA binding,GO:0003735~structural constituent of ribosome,GO:0044822~poly(A) RNA binding,		3D-structure,Acetylation,Citrullination,Complete proteome,Cytoplasm,Direct protein sequencing,Phosphoprotein,Proteomics identification,Reference proteome,Ribonucleoprotein,Ribosomal protein,Translation regulation,
RPL27	ribosomal protein L27(RPL27)	GO:0003735~structural constituent of ribosome,GO:0044822~poly(A) RNA binding,	SM00739:KOW,	3D-structure,Acetylation,Complete proteome,Proteomics identification,Reference proteome,Ribonucleoprotein,Ribosomal protein,
RPL7A	ribosomal protein L7a(RPL7A)	GO:0003723~RNA binding,GO:0003735~structural constituent of ribosome,GO:0005515~protein binding,GO:0044822~poly(A) RNA binding,GO:0098641~cadherin binding involved in cell-cell adhesion,		3D-structure,Acetylation,Chromosomal rearrangement,Complete proteome,Proteomics identification,Reference proteome,Ribonucleoprotein,Ribosomal protein,
RPS13	ribosomal protein S13(RPS13)	GO:0003729~mRNA binding,GO:0003735~structural constituent of ribosome,GO:0005515~protein binding,GO:0044822~poly(A) RNA binding,GO:0070181~small ribosomal subunit rRNA binding,GO:1990932~5.8S rRNA binding,	SM01386:SM01386,SM01387:SM01387,	3D-structure,Acetylation,Complete proteome,Direct protein sequencing,Phosphoprotein,Proteomics identification,Reference proteome,Ribonucleoprotein,Ribosomal protein,
RPS18	ribosomal protein S18(RPS18)	GO:0003723~RNA binding,GO:0003735~structural constituent of ribosome,GO:0005515~protein binding,GO:0019843~rRNA binding,GO:0019901~protein kinase binding,GO:0044822~poly(A) RNA binding,		3D-structure,Acetylation,Collagen,Complete proteome,Cytoplasm,Direct protein sequencing,Proteomics identification,Reference proteome,Ribonucleoprotein,Ribosomal protein,RNA-binding,rRNA-binding,
RPS27	ribosomal protein S27(RPS27)	GO:0003677~DNA binding,GO:0003735~structural constituent of ribosome,GO:0005515~protein binding,GO:0008270~zinc ion binding,GO:0044822~poly(A) RNA binding,		3D-structure,Complete proteome,Direct protein sequencing,Metal-binding,Phosphoprotein,Proteomics identification,Reference proteome,Ribonucleoprotein,Ribosomal protein,Zinc,Zinc-finger,
RPS3	ribosomal protein S3(RPS3)	GO:0003677~DNA binding,GO:0003684~damaged DNA binding,GO:0003723~RNA binding,GO:0003729~mRNA binding,GO:0003735~structural constituent of ribosome,GO:0003906~DNA-(apurinic or apyrimidinic site) lyase activity,GO:0004520~endodeoxyribonuclease activity,GO:0005515~protein binding,GO:0008017~microtubule binding,GO:0008134~transcription factor binding,GO:0015631~tubulin binding,GO:0019104~DNA N-glycos…		3D-structure,Acetylation,Alternative splicing,Apoptosis,Cell cycle,Cell division,Complete proteome,Cytoplasm,Cytoskeleton,Direct protein sequencing,DNA damage,DNA repair,DNA-binding,Isopeptide bond,Lyase,Membrane,Methylation,Mitochondrion,Mitochondrion inner membrane,Mitosis,Nucleus,Phosphoprotein,Proteomics identification,Reference proteome,Ribonucleoprotein,Ribosomal protein,RNA-binding,Transcr…
RPS7	ribosomal protein S7(RPS7)	GO:0003723~RNA binding,GO:0003735~structural constituent of ribosome,GO:0005515~protein binding,GO:0044822~poly(A) RNA binding,		3D-structure,Acetylation,Complete proteome,Cytoplasm,Cytoskeleton,Diamond-Blackfan anemia,Direct protein sequencing,Proteomics identification,Reference proteome,Ribonucleoprotein,Ribosomal protein,
RPSA	ribosomal protein SA(RPSA)	GO:0001618~virus receptor activity,GO:0003735~structural constituent of ribosome,GO:0005055~laminin receptor activity,GO:0005515~protein binding,GO:0043022~ribosome binding,GO:0043236~laminin binding,GO:0044822~poly(A) RNA binding,		3D-structure,Acetylation,Cell membrane,Complete proteome,Cytoplasm,Direct protein sequencing,Disease mutation,Host cell receptor for virus entry,Host-virus interaction,Membrane,Nucleus,Phosphoprotein,Polymorphism,Proteomics identification,Receptor,Reference proteome,Repeat,Ribonucleoprotein,Ribosomal protein,
RPLP0	ribosomal protein lateral stalk subunit P0(RPLP0)	GO:0003735~structural constituent of ribosome,GO:0005515~protein binding,GO:0042277~peptide binding,GO:0044822~poly(A) RNA binding,GO:0070180~large ribosomal subunit rRNA binding,		3D-structure,Alternative splicing,Complete proteome,Cytoplasm,Direct protein sequencing,Host-virus interaction,Isopeptide bond,Nucleus,Phosphoprotein,Proteomics identification,Reference proteome,Ribonucleoprotein,Ribosomal protein,Ubl conjugation,
RNF20	ring finger protein 20(RNF20)	GO:0002039~p53 binding,GO:0003682~chromatin binding,GO:0003713~transcription coactivator activity,GO:0003730~mRNA 3'-UTR binding,GO:0004842~ubiquitin-protein transferase activity,GO:0005515~protein binding,GO:0008270~zinc ion binding,GO:0016874~ligase activity,GO:0031625~ubiquitin protein ligase binding,GO:0042393~histone binding,	SM00184:RING,	3D-structure,Acetylation,CAH69963/CAI14618),Chromatin regulator,Coiled coil,Complete proteome,Metal-binding,Nucleus,Phosphoprotein,Proteomics identification,Reference proteome,Transferase,Ubl conjugation pathway,Zinc,Zinc-fingerFT CONFLICT 149 149 G -> GKW (in Ref 3,
SAFB	scaffold attachment factor B(SAFB)	GO:0000166~nucleotide binding,GO:0001047~core promoter binding,GO:0003676~nucleic acid binding,GO:0003682~chromatin binding,GO:0003690~double-stranded DNA binding,GO:0005515~protein binding,GO:0043565~sequence-specific DNA binding,GO:0044822~poly(A) RNA binding,	SM00360:RRM,SM00513:SAP,	Acetylation,Alternative splicing,Coiled coil,Complete proteome,Direct protein sequencing,DNA-binding,Isopeptide bond,Methylation,Nucleus,Phosphoprotein,Proteomics identification,Reference proteome,Repressor,RNA-binding,Transcription,Transcription regulation,Ubl conjugation,
SRRM1	serine and arginine repetitive matrix 1(SRRM1)	GO:0003677~DNA binding,GO:0005515~protein binding,GO:0044822~poly(A) RNA binding,	SM00311:PWI,	3D-structure,Acetylation,Alternative splicing,Citrullination,Coiled coil,Complete proteome,Direct protein sequencing,DNA-binding,Isopeptide bond,mRNA processing,mRNA splicing,Nucleus,Phosphoprotein,Polymorphism,Proteomics identification,Reference proteome,RNA-binding,Spliceosome,Ubl conjugation,
SHMT2	serine hydroxymethyltransferase 2(SHMT2)	GO:0003682~chromatin binding,GO:0004372~glycine hydroxymethyltransferase activity,GO:0005515~protein binding,GO:0008168~methyltransferase activity,GO:0008732~L-allo-threonine aldolase activity,GO:0016597~amino acid binding,GO:0016740~transferase activity,GO:0030170~pyridoxal phosphate binding,GO:0042802~identical protein binding,		3D-structure,Acetylation,Alternative splicing,Complete proteome,Cytoplasm,Membrane,Methyltransferase,Mitochondrion,Mitochondrion inner membrane,Mitochondrion nucleoid,Nucleus,One-carbon metabolism,Phosphoprotein,Proteomics identification,Pyridoxal phosphate,Reference proteome,Transferase,Transit peptide,
STK24	serine/threonine kinase 24(STK24)	GO:0004672~protein kinase activity,GO:0004674~protein serine/threonine kinase activity,GO:0004702~receptor signaling protein serine/threonine kinase activity,GO:0005515~protein binding,GO:0005524~ATP binding,GO:0046872~metal ion binding,GO:0098641~cadherin binding involved in cell-cell adhesion,	SM00220:S_TKc,	3D-structure,Acetylation,Alternative splicing,Apoptosis,ATP-binding,Coiled coil,Complete proteome,Cytoplasm,Kinase,Magnesium,Membrane,Metal-binding,Nucleotide-binding,Nucleus,Phosphoprotein,Polymorphism,Proteomics identification,Reference proteome,Serine/threonine-protein kinase,Transferase,
SLC25A19	solute carrier family 25 member 19(SLC25A19)	GO:0003735~structural constituent of ribosome,GO:0030233~deoxynucleotide transmembrane transporter activity,		Alternative splicing,Complete proteome,Disease mutation,Membrane,Mitochondrion,Mitochondrion inner membrane,Neuropathy,Phosphoprotein,Proteomics identification,Reference proteome,Repeat,Transmembrane,Transmembrane helix,Transport,
SORBS2	sorbin and SH3 domain containing 2(SORBS2)	GO:0005200~structural constituent of cytoskeleton,GO:0005515~protein binding,GO:0008093~cytoskeletal adaptor activity,GO:0008307~structural constituent of muscle,GO:0044822~poly(A) RNA binding,GO:0046872~metal ion binding,	SM00326:SH3,SM00459:Sorb,	3D-structure,Alternative splicing,Amidation,Cell junction,Cell membrane,Cell projection,Complete proteome,Cytoplasm,Membrane,Phosphoprotein,Polymorphism,Proteomics identification,Reference proteome,Repeat,SH3 domain,Ubl conjugation,
SPAST	spastin(SPAST)	GO:0005515~protein binding,GO:0005524~ATP binding,GO:0008017~microtubule binding,GO:0008568~microtubule-severing ATPase activity,GO:0043014~alpha-tubulin binding,GO:0048487~beta-tubulin binding,	SM00382:AAA,SM00745:MIT,	3D-structure,Allosteric enzyme,Alternative initiation,Alternative promoter usage,Alternative splicing,ATP-binding,Cell cycle,Cell division,Complete proteome,Cytoplasm,Cytoskeleton,Developmental protein,Differentiation,Disease mutation,Endoplasmic reticulum,Endosome,Hereditary spastic paraplegia,Hydrolase,Lipid droplet,Membrane,Microtubule,Neurodegeneration,Neurogenesis,Nucleotide-binding,Nucleus,…
SPTBN1	spectrin beta, non-erythrocytic 1(SPTBN1)	GO:0003779~actin binding,GO:0005088~Ras guanyl-nucleotide exchange factor activity,GO:0005200~structural constituent of cytoskeleton,GO:0005515~protein binding,GO:0005516~calmodulin binding,GO:0005543~phospholipid binding,GO:0030506~ankyrin binding,GO:0032403~protein complex binding,GO:0044822~poly(A) RNA binding,GO:0051020~GTPase binding,GO:0098641~cadherin binding involved in cell-cell adhesion,	SM00033:CH,SM00150:SPEC,SM00233:PH,	3D-structure,Acetylation,Actin capping,Actin-binding,Alternative splicing,Calmodulin-binding,Cell membrane,Coiled coil,Complete proteome,Cytoplasm,Cytoskeleton,Glycoprotein,Membrane,Phosphoprotein,Polymorphism,Proteomics identification,Reference proteome,Repeat,
SF1	splicing factor 1(SF1)	GO:0003714~transcription corepressor activity,GO:0003723~RNA binding,GO:0005515~protein binding,GO:0008270~zinc ion binding,GO:0042802~identical protein binding,GO:0044822~poly(A) RNA binding,GO:0045131~pre-mRNA branch point binding,	SM00322:KH,SM00343:ZnF_C2HC,	3D-structure,Acetylation,Alternative splicing,Complete proteome,Direct protein sequencing,Metal-binding,Methylation,mRNA processing,mRNA splicing,Nucleus,Phosphoprotein,Polymorphism,Proteomics identification,Reference proteome,Repressor,RNA-binding,Spliceosome,Transcription,Transcription regulation,Zinc,Zinc-finger,
SF3B5	splicing factor 3b subunit 5(SF3B5)			Acetylation,Complete proteome,mRNA processing,mRNA splicing,Nucleus,Phosphoprotein,Reference proteome,Spliceosome,
SFPQ	splicing factor proline and glutamine rich(SFPQ)	GO:0000166~nucleotide binding,GO:0000976~transcription regulatory region sequence-specific DNA binding,GO:0000980~RNA polymerase II distal enhancer sequence-specific DNA binding,GO:0001047~core promoter binding,GO:0003676~nucleic acid binding,GO:0003682~chromatin binding,GO:0005515~protein binding,GO:0042826~histone deacetylase binding,GO:0044212~transcription regulatory region DNA binding,GO:004…	SM00360:RRM,	3D-structure,Acetylation,Activator,Alternative splicing,Biological rhythms,Chromosomal rearrangement,Coiled coil,Complete proteome,Cytoplasm,Direct protein sequencing,DNA damage,DNA recombination,DNA repair,DNA-binding,Isopeptide bond,Methylation,mRNA processing,mRNA splicing,Nucleus,Phosphoprotein,Proteomics identification,Reference proteome,Repeat,Repressor,RNA-binding,Transcription,Transcripti…
SND1	staphylococcal nuclease and tudor domain containing 1(SND1)	GO:0003676~nucleic acid binding,GO:0003712~transcription cofactor activity,GO:0004518~nuclease activity,GO:0005515~protein binding,GO:0044822~poly(A) RNA binding,GO:0098641~cadherin binding involved in cell-cell adhesion,	SM00318:SNc,SM00333:TUDOR,	3D-structure,Acetylation,Complete proteome,Cytoplasm,Direct protein sequencing,Host-virus interaction,Nucleus,Phosphoprotein,Proteomics identification,Reference proteome,Repeat,Transcription,Transcription regulation,
STIP1	stress induced phosphoprotein 1(STIP1)	GO:0005515~protein binding,GO:0008022~protein C-terminus binding,GO:0030544~Hsp70 protein binding,GO:0044822~poly(A) RNA binding,GO:0051087~chaperone binding,	SM00028:TPR,SM00727:STI1,	3D-structure,Acetylation,Alternative splicing,Complete proteome,Cytoplasm,Direct protein sequencing,Isopeptide bond,Nucleus,Phosphoprotein,Proteomics identification,Reference proteome,Repeat,TPR repeat,Ubl conjugation,
SMC1A	structural maintenance of chromosomes 1A(SMC1A)	GO:0003682~chromatin binding,GO:0005515~protein binding,GO:0005524~ATP binding,GO:0036033~mediator complex binding,GO:0044822~poly(A) RNA binding,GO:0046982~protein heterodimerization activity,	SM00968:SM00968,	Acetylation,ATP-binding,Cell cycle,Cell division,Centromere,Chromosome,Coiled coil,Complete proteome,Direct protein sequencing,Disease mutation,DNA damage,DNA repair,Kinetochore,Meiosis,Mental retardation,Mitosis,Nucleotide-binding,Nucleus,Phosphoprotein,Polymorphism,Proteomics identification,Reference proteome,
SMC3	structural maintenance of chromosomes 3(SMC3)	GO:0003682~chromatin binding,GO:0003777~microtubule motor activity,GO:0005515~protein binding,GO:0005524~ATP binding,GO:0036033~mediator complex binding,GO:0045502~dynein binding,GO:0046982~protein heterodimerization activity,	SM00968:SM00968,	Acetylation,ATP-binding,Cell cycle,Cell division,Centromere,Chromosome,Coiled coil,Complete proteome,Disease mutation,DNA damage,DNA repair,Meiosis,Mental retardation,Mitosis,Nucleotide-binding,Nucleus,Phosphoprotein,Reference proteome,
SMC4	structural maintenance of chromosomes 4(SMC4)	GO:0005515~protein binding,GO:0005524~ATP binding,GO:0046982~protein heterodimerization activity,	SM00968:SM00968,	3D-structure,Acetylation,Alternative splicing,ATP-binding,Cell cycle,Cell division,Chromosome,Coiled coil,Complete proteome,Cytoplasm,DNA condensation,Mitosis,Nucleotide-binding,Nucleus,Phosphoprotein,Polymorphism,Proteomics identification,Reference proteome,
SMC5	structural maintenance of chromosomes 5(SMC5)	GO:0005515~protein binding,GO:0005524~ATP binding,		ATP-binding,Cell cycle,Cell division,Chromosome,Coiled coil,Complete proteome,DNA damage,DNA recombination,DNA repair,Mitosis,Nucleotide-binding,Nucleus,Phosphoprotein,Polymorphism,Reference proteome,Telomere,Ubl conjugation,
SSRP1	structure specific recognition protein 1(SSRP1)	GO:0003677~DNA binding,GO:0003682~chromatin binding,GO:0005515~protein binding,GO:0044822~poly(A) RNA binding,	SM00398:HMG,SM01287:SM01287,	3D-structure,Acetylation,Chromosome,Complete proteome,Direct protein sequencing,DNA damage,DNA repair,DNA replication,DNA-binding,Nucleus,Phosphoprotein,Polymorphism,Proteomics identification,Reference proteome,Transcription,Transcription regulation,Ubl conjugation,
SMNDC1	survival motor neuron domain containing 1(SMNDC1)	GO:0005515~protein binding,GO:0044822~poly(A) RNA binding,	SM00333:TUDOR,	3D-structure,Acetylation,Apoptosis,Complete proteome,Direct protein sequencing,mRNA processing,mRNA splicing,Nucleus,Phosphoprotein,Reference proteome,Spliceosome,
SYNCRIP	synaptotagmin binding cytoplasmic RNA interacting protein(SYNCRIP)	GO:0000166~nucleotide binding,GO:0003676~nucleic acid binding,GO:0003723~RNA binding,GO:0005515~protein binding,GO:0008143~poly(A) binding,GO:0044822~poly(A) RNA binding,	SM00360:RRM,	3D-structure,Acetylation,Alternative splicing,Complete proteome,Cytoplasm,Direct protein sequencing,Endoplasmic reticulum,Host-virus interaction,Isopeptide bond,Methylation,Microsome,mRNA processing,mRNA splicing,Nucleus,Phosphoprotein,Proteomics identification,Reference proteome,Repeat,Ribonucleoprotein,RNA-binding,Spliceosome,Translation regulation,Viral nucleoprotein,Virion,
THYN1	thymocyte nuclear protein 1(THYN1)			3D-structure,Alternative splicing,Complete proteome,Nucleus,Phosphoprotein,Reference proteome,
TMPO	thymopoietin(TMPO)	GO:0003677~DNA binding,GO:0005521~lamin binding,GO:0098641~cadherin binding involved in cell-cell adhesion,	SM00540:LEM,SM01261:SM01261,	3D-structure,Acetylation,Alternative splicing,Cardiomyopathy,Chromosome,Citrullination,Coiled coil,Complete proteome,Cytoplasm,Direct protein sequencing,Disease mutation,DNA-binding,Membrane,Methylation,Nucleus,Pharmaceutical,Phosphoprotein,Polymorphism,Proteomics identification,Reference proteome,Signal-anchor,Transmembrane,Transmembrane helix,
TOP1	topoisomerase (DNA) I(TOP1)	GO:0001046~core promoter sequence-specific DNA binding,GO:0003677~DNA binding,GO:0003682~chromatin binding,GO:0003917~DNA topoisomerase type I activity,GO:0005515~protein binding,GO:0044822~poly(A) RNA binding,	SM00435:TOPEUc,	3D-structure,Acetylation,Biological rhythms,Chromosomal rearrangement,Coiled coil,Complete proteome,Direct protein sequencing,DNA-binding,Host-virus interaction,Isomerase,Isopeptide bond,Nucleus,Phosphoprotein,Polymorphism,Proto-oncogene,Reference proteome,Topoisomerase,Ubl conjugation,
TOP2A	topoisomerase (DNA) II alpha(TOP2A)	GO:0000287~magnesium ion binding,GO:0003677~DNA binding,GO:0003682~chromatin binding,GO:0003918~DNA topoisomerase type II (ATP-hydrolyzing) activity,GO:0005080~protein kinase C binding,GO:0005515~protein binding,GO:0005524~ATP binding,GO:0008022~protein C-terminus binding,GO:0008094~DNA-dependent ATPase activity,GO:0008144~drug binding,GO:0008301~DNA binding, bending,GO:0019899~enzyme binding,GO:…	SM00433:TOP2c,SM00434:TOP4c,	3D-structure,Acetylation,Alternative splicing,ATP-binding,Biological rhythms,Complete proteome,Cytoplasm,Direct protein sequencing,DNA-binding,Isomerase,Isopeptide bond,Magnesium,Metal-binding,Nucleotide-binding,Nucleus,Phosphoprotein,Polymorphism,Proteomics identification,Reference proteome,Topoisomerase,Ubl conjugation,
TOP2B	topoisomerase (DNA) II beta(TOP2B)	GO:0003677~DNA binding,GO:0003682~chromatin binding,GO:0003918~DNA topoisomerase type II (ATP-hydrolyzing) activity,GO:0005080~protein kinase C binding,GO:0005524~ATP binding,GO:0008022~protein C-terminus binding,GO:0008301~DNA binding, bending,GO:0019899~enzyme binding,GO:0042826~histone deacetylase binding,GO:0046872~metal ion binding,GO:0046982~protein heterodimerization activity,	SM00433:TOP2c,SM00434:TOP4c,	3D-structure,Acetylation,Alternative splicing,ATP-binding,Complete proteome,Cytoplasm,DNA-binding,Isomerase,Isopeptide bond,Magnesium,Metal-binding,Nucleotide-binding,Nucleus,Phosphoprotein,Proteomics identification,Reference proteome,Topoisomerase,Ubl conjugation,
TCERG1	transcription elongation regulator 1(TCERG1)	GO:0001103~RNA polymerase II repressing transcription factor binding,GO:0001106~RNA polymerase II transcription corepressor activity,GO:0003713~transcription coactivator activity,GO:0005515~protein binding,GO:0044822~poly(A) RNA binding,GO:0070064~proline-rich region binding,	SM00441:FF,SM00456:WW,	3D-structure,Activator,Alternative splicing,Coiled coil,Complete proteome,Direct protein sequencing,Isopeptide bond,Methylation,Nucleus,Phosphoprotein,Proteomics identification,Reference proteome,Repeat,Repressor,Transcription,Transcription regulation,Ubl conjugation,
TFAM	transcription factor A, mitochondrial(TFAM)	GO:0000978~RNA polymerase II core promoter proximal region sequence-specific DNA binding,GO:0001077~transcriptional activator activity, RNA polymerase II core promoter proximal region sequence-specific binding,GO:0001223~transcription coactivator binding,GO:0003677~DNA binding,GO:0003682~chromatin binding,GO:0003700~transcription factor activity, sequence-specific DNA binding,GO:0005515~protein b…	SM00398:HMG,	3D-structure,Activator,Alternative splicing,Complete proteome,Direct protein sequencing,DNA-binding,Mitochondrion,Mitochondrion nucleoid,Phosphoprotein,Polymorphism,Proteomics identification,Reference proteome,Repeat,Signal,Transcription,Transcription regulation,Transit peptide,
TFAP2A	transcription factor AP-2 alpha(TFAP2A)	GO:0000976~transcription regulatory region sequence-specific DNA binding,GO:0000978~RNA polymerase II core promoter proximal region sequence-specific DNA binding,GO:0000979~RNA polymerase II core promoter sequence-specific DNA binding,GO:0000981~RNA polymerase II transcription factor activity, sequence-specific DNA binding,GO:0000982~transcription factor activity, RNA polymerase II core promoter …		Activator,Alternative splicing,Complete proteome,Direct protein sequencing,Disease mutation,DNA-binding,Isopeptide bond,Nucleus,Phosphoprotein,Proteomics identification,Reference proteome,Transcription,Transcription regulation,Ubl conjugation,
TFAP4	transcription factor AP-4(TFAP4)	GO:0000978~RNA polymerase II core promoter proximal region sequence-specific DNA binding,GO:0001077~transcriptional activator activity, RNA polymerase II core promoter proximal region sequence-specific binding,GO:0003677~DNA binding,GO:0003705~transcription factor activity, RNA polymerase II distal enhancer sequence-specific binding,GO:0003713~transcription coactivator activity,GO:0005515~protein…	SM00353:HLH,	Activator,Coiled coil,Complete proteome,Direct protein sequencing,DNA-binding,Nucleus,Phosphoprotein,Polymorphism,Proteomics identification,Reference proteome,Repeat,Transcription,Transcription regulation,
TFCP2	transcription factor CP2(TFCP2)	GO:0003677~DNA binding,GO:0003700~transcription factor activity, sequence-specific DNA binding,GO:0005515~protein binding,GO:0008022~protein C-terminus binding,GO:0043565~sequence-specific DNA binding,		Alternative splicing,Complete proteome,Direct protein sequencing,DNA-binding,Nucleus,Phosphoprotein,Proteomics identification,Reference proteome,Transcription,Transcription regulation,
TFE3	transcription factor binding to IGHM enhancer 3(TFE3)	GO:0000978~RNA polymerase II core promoter proximal region sequence-specific DNA binding,GO:0001077~transcriptional activator activity, RNA polymerase II core promoter proximal region sequence-specific binding,GO:0003700~transcription factor activity, sequence-specific DNA binding,GO:0044212~transcription regulatory region DNA binding,GO:0046983~protein dimerization activity,	SM00353:HLH,	Activator,Adaptive immunity,Alternative splicing,Chromosomal rearrangement,Coiled coil,Complete proteome,DNA-binding,Immunity,Methylation,Nucleus,Phosphoprotein,Polymorphism,Proto-oncogene,Reference proteome,Transcription,Transcription regulation,Ubl conjugation,
TMA16	translation machinery associated 16 homolog(TMA16)	GO:0005515~protein binding,		Complete proteome,Polymorphism,Proteomics identification,Reference proteome,
TOMM34	translocase of outer mitochondrial membrane 34(TOMM34)	GO:0005515~protein binding,GO:0031072~heat shock protein binding,	SM00028:TPR,	Chaperone,Complete proteome,Cytoplasm,Membrane,Mitochondrion,Mitochondrion outer membrane,Phosphoprotein,Polymorphism,Reference proteome,Repeat,TPR repeat,
TPR	translocated promoter region, nuclear basket protein(TPR)	GO:0003682~chromatin binding,GO:0003729~mRNA binding,GO:0005215~transporter activity,GO:0005487~nucleocytoplasmic transporter activity,GO:0005515~protein binding,GO:0008855~exodeoxyribonuclease VII activity,GO:0015631~tubulin binding,GO:0031072~heat shock protein binding,GO:0042803~protein homodimerization activity,GO:0043495~protein anchor,GO:0044822~poly(A) RNA binding,GO:0051019~mitogen-activa…		Acetylation,Alternative splicing,Cell cycle,Cell division,Centromere,Chromosomal rearrangement,Chromosome,Coiled coil,Complete proteome,Cytoplasm,Cytoskeleton,Direct protein sequencing,Kinetochore,Membrane,Methylation,Mitosis,mRNA transport,Nuclear pore complex,Nucleus,Phosphoprotein,Polymorphism,Protein transport,Proteomics identification,Proto-oncogene,Reference proteome,Translocation,Transport,
TGS1	trimethylguanosine synthase 1(TGS1)	GO:0005515~protein binding,GO:0008173~RNA methyltransferase activity,GO:0071164~RNA trimethylguanosine synthase activity,		3D-structure,Complete proteome,Cytoplasm,Methyltransferase,Nucleus,Phosphoprotein,Polymorphism,Reference proteome,S-adenosyl-L-methionine,Transcription,Transcription regulation,Transferase,
TRIM33	tripartite motif containing 33(TRIM33)	GO:0003677~DNA binding,GO:0004842~ubiquitin-protein transferase activity,GO:0005515~protein binding,GO:0008270~zinc ion binding,GO:0016874~ligase activity,GO:0070410~co-SMAD binding,GO:0070412~R-SMAD binding,	SM00184:RING,SM00249:PHD,SM00297:BROMO,SM00336:BBOX,SM00502:BBC,	3D-structure,Acetylation,Alternative splicing,Bromodomain,Chromosomal rearrangement,Coiled coil,Complete proteome,DNA-binding,Isopeptide bond,Ligase,Metal-binding,Methylation,Nucleus,Phosphoprotein,Polymorphism,Proteomics identification,Reference proteome,Repeat,Repressor,Transcription,Transcription regulation,Ubl conjugation,Ubl conjugation pathway,Zinc,Zinc-finger,
YWHAB	tyrosine 3-monooxygenase/tryptophan 5-monooxygenase activation protein beta(YWHAB)	GO:0003714~transcription corepressor activity,GO:0005515~protein binding,GO:0008022~protein C-terminus binding,GO:0019899~enzyme binding,GO:0019904~protein domain specific binding,GO:0032403~protein complex binding,GO:0042826~histone deacetylase binding,GO:0050815~phosphoserine binding,GO:0051219~phosphoprotein binding,GO:0098641~cadherin binding involved in cell-cell adhesion,	SM00101:14_3_3,	3D-structure,Acetylation,Alternative initiation,Coiled coil,Complete proteome,Cytoplasm,Direct protein sequencing,Host-virus interaction,Nitration,Phosphoprotein,Polymorphism,Proteomics identification,Reference proteome,
YARS	tyrosyl-tRNA synthetase(YARS)	GO:0000049~tRNA binding,GO:0004812~aminoacyl-tRNA ligase activity,GO:0004831~tyrosine-tRNA ligase activity,GO:0004832~valine-tRNA ligase activity,GO:0004871~signal transducer activity,GO:0005153~interleukin-8 receptor binding,GO:0005515~protein binding,GO:0005524~ATP binding,GO:0044822~poly(A) RNA binding,		3D-structure,Acetylation,Aminoacyl-tRNA synthetase,ATP-binding,Charcot-Marie-Tooth disease,Complete proteome,Cytoplasm,Direct protein sequencing,Disease mutation,Ligase,Neurodegeneration,Neuropathy,Nucleotide-binding,Phosphoprotein,Polymorphism,Protein biosynthesis,Proteomics identification,Reference proteome,RNA-binding,tRNA-binding,
UBAP2	ubiquitin associated protein 2(UBAP2)	GO:0044822~poly(A) RNA binding,GO:0098641~cadherin binding involved in cell-cell adhesion,	SM00165:UBA,	Alternative splicing,Coiled coil,Complete proteome,Methylation,Phosphoprotein,Polymorphism,Proteomics identification,Reference proteome,
UBA1	ubiquitin like modifier activating enzyme 1(UBA1)	GO:0004839~ubiquitin activating enzyme activity,GO:0004842~ubiquitin-protein transferase activity,GO:0005515~protein binding,GO:0005524~ATP binding,GO:0008641~small protein activating enzyme activity,GO:0044822~poly(A) RNA binding,	SM00985:SM00985,	3D-structure,Acetylation,Alternative initiation,ATP-binding,Complete proteome,Cytoplasm,Direct protein sequencing,Disease mutation,Ligase,Mitochondrion,Neurodegeneration,Nucleotide-binding,Nucleus,Phosphoprotein,Polymorphism,Proteomics identification,Reference proteome,Repeat,Ubl conjugation,Ubl conjugation pathway,
UHRF1	ubiquitin like with PHD and ring finger domains 1(UHRF1)	GO:0000987~core promoter proximal region sequence-specific DNA binding,GO:0003700~transcription factor activity, sequence-specific DNA binding,GO:0004842~ubiquitin-protein transferase activity,GO:0005515~protein binding,GO:0008270~zinc ion binding,GO:0008327~methyl-CpG binding,GO:0016874~ligase activity,GO:0031493~nucleosomal histone binding,GO:0035064~methylated histone binding,GO:0042393~histon…	SM00184:RING,SM00213:UBQ,SM00249:PHD,SM00466:SRA,	3D-structure,Acetylation,Alternative splicing,Cell cycle,Chromatin regulator,Coiled coil,Complete proteome,DNA damage,DNA repair,DNA-binding,Isopeptide bond,Ligase,Metal-binding,Nucleus,Phosphoprotein,Polymorphism,Proteomics identification,Reference proteome,Repeat,Repressor,Transcription,Transcription regulation,Ubl conjugation,Ubl conjugation pathway,Zinc,Zinc-finger,
UNC45A	unc-45 myosin chaperone A(UNC45A)	GO:0005515~protein binding,GO:0051879~Hsp90 protein binding,GO:0098641~cadherin binding involved in cell-cell adhesion,	SM00028:TPR,	3D-structure,Acetylation,Alternative splicing,Chaperone,Complete proteome,Cytoplasm,Developmental protein,Differentiation,Myogenesis,Nucleus,Phosphoprotein,Polymorphism,Reference proteome,Repeat,TPR repeat,
UBP1	upstream binding protein 1 (LBP-1a)(UBP1)	GO:0003677~DNA binding,GO:0003700~transcription factor activity, sequence-specific DNA binding,GO:0003714~transcription corepressor activity,GO:0043565~sequence-specific DNA binding,		Alternative splicing,Complete proteome,DNA-binding,Nucleus,Phosphoprotein,Polymorphism,Proteomics identification,Reference proteome,Transcription,Transcription regulation,
VRK1	vaccinia related kinase 1(VRK1)	GO:0004672~protein kinase activity,GO:0004674~protein serine/threonine kinase activity,GO:0005515~protein binding,GO:0005524~ATP binding,GO:0019901~protein kinase binding,GO:0031493~nucleosomal histone binding,GO:0035175~histone kinase activity (H3-S10 specific),GO:0072354~histone kinase activity (H3-T3 specific),	SM00220:S_TKc,	3D-structure,ATP-binding,Cell cycle,Cell division,Complete proteome,Cytoplasm,Cytoskeleton,Kinase,Membrane,Mitosis,Neurodegeneration,Nucleotide-binding,Nucleus,Phosphoprotein,Proteomics identification,Reference proteome,Serine/threonine-protein kinase,Transferase,Transmembrane,Transmembrane helix,
VRK3	vaccinia related kinase 3(VRK3)	GO:0004672~protein kinase activity,GO:0004674~protein serine/threonine kinase activity,GO:0005515~protein binding,GO:0005524~ATP binding,GO:0019903~protein phosphatase binding,	SM00220:S_TKc,	3D-structure,Alternative splicing,Complete proteome,Kinase,Nucleotide-binding,Nucleus,Phosphoprotein,Polymorphism,Proteomics identification,Reference proteome,Transferase,
