# Supplementary material for: Nuclear Phosphoinositides: Their Regulation and Roles in Nuclear Functions
Source: MDPI journal article supplement (doi:10.3390/ijms20122991), 2019-06-19
Supplement: s1 [file supplementary_table_2.xlsx]

## Sheet: process enrichement
#term ID	term description	observed gene count	background gene count	false discovery rate	matching proteins in your network (IDs)	matching proteins in your network (labels)
GO:0090304	nucleic acid metabolic process	204	3941	5.21e-58	ENSP00000199320,ENSP00000204517,ENSP00000216038,ENSP00000216122,ENSP00000216297,ENSP00000216714,ENSP00000221419,ENSP00000224073,ENSP00000225298,ENSP00000225792,ENSP00000228251,ENSP00000230340,ENSP00000240185,ENSP00000246194,ENSP00000250916,ENSP00000253363,ENSP00000254108,ENSP00000254719,ENSP00000257915,ENSP00000260129,ENSP00000261308,ENSP00000261531,ENSP00000261600,ENSP00000262367,ENSP00000262887…	ADRM1,ALKBH5,ALYREF,ANP32A,APEX1,ARRB2,BAZ2A,BCAS2,BTK,BYSL,CARM1,CBFB,CBX3,CDK1,CELF1,CELF2,CHAF1A,CHAF1B,CHD1L,CHD7,CHD9,CHEK1,CNBP,CPSF6,CPSF7,CREBBP,CRTC3,CSTF3,CXXC1,DDB1,DDX1,DDX17,DDX21,DDX39B,DDX3X,DDX5,DDX52,DDX6,DEK,DHX15,DIMT1,DKC1,DNAJC2,DNMT1,EBNA1BP2,EDF1,EEF1A1,EEF1D,EIF4A1,ELAVL1,ESRRA,ETF1,EWSR1,FAM103A1,FLNA,FMR1,FUS,G3BP1,GTF2B,GTF2I,HDAC2,HELLS,HMGA1,HMGA2,HMGB2,HMGB3,HNRNPA0,…
GO:0006139	nucleobase-containing compound metabolic process	212	4551	5.81e-54	ENSP00000199320,ENSP00000204517,ENSP00000216038,ENSP00000216122,ENSP00000216297,ENSP00000216714,ENSP00000221419,ENSP00000224073,ENSP00000225298,ENSP00000225792,ENSP00000228251,ENSP00000230340,ENSP00000240185,ENSP00000246194,ENSP00000250916,ENSP00000253363,ENSP00000254108,ENSP00000254719,ENSP00000257915,ENSP00000260129,ENSP00000261308,ENSP00000261531,ENSP00000261600,ENSP00000262367,ENSP00000262887…	ACACB,ADRM1,ALDOA,ALKBH5,ALYREF,ANP32A,APEX1,ARRB2,ATP5J2,BAZ2A,BCAS2,BTK,BYSL,CARM1,CBFB,CBX3,CDK1,CELF1,CELF2,CHAF1A,CHAF1B,CHD1L,CHD7,CHD9,CHEK1,CMPK1,CNBP,CPSF6,CPSF7,CREBBP,CRTC3,CSTF3,CXXC1,DDB1,DDX1,DDX17,DDX21,DDX39B,DDX3X,DDX5,DDX52,DDX6,DEK,DHX15,DIMT1,DKC1,DNAJC2,DNMT1,EBNA1BP2,EDF1,EEF1A1,EEF1D,EIF4A1,ELAVL1,ESRRA,ETF1,EWSR1,FAM103A1,FLNA,FMR1,FUS,G3BP1,GTF2B,GTF2I,HDAC2,HELLS,HMGA1,H…
GO:0034641	cellular nitrogen compound metabolic process	223	5126	1.7e-53	ENSP00000199320,ENSP00000204517,ENSP00000216038,ENSP00000216122,ENSP00000216297,ENSP00000216714,ENSP00000217182,ENSP00000221419,ENSP00000224073,ENSP00000225298,ENSP00000225792,ENSP00000228251,ENSP00000230340,ENSP00000240185,ENSP00000246194,ENSP00000250916,ENSP00000253363,ENSP00000254108,ENSP00000254719,ENSP00000254730,ENSP00000256383,ENSP00000257915,ENSP00000260129,ENSP00000261308,ENSP00000261531…	ACACB,ADRM1,ALDOA,ALKBH5,ALYREF,ANP32A,APEX1,ARRB2,ATP5J2,BAZ2A,BCAS2,BTK,BYSL,CARM1,CBFB,CBX3,CDK1,CELF1,CELF2,CHAF1A,CHAF1B,CHD1L,CHD7,CHD9,CHEK1,CMPK1,CNBP,CPSF6,CPSF7,CREBBP,CRTC3,CSTF3,CXXC1,DDB1,DDX1,DDX17,DDX21,DDX39B,DDX3X,DDX5,DDX52,DDX6,DEK,DHX15,DIMT1,DKC1,DNAJC2,DNMT1,EBNA1BP2,EDF1,EEF1A1,EEF1A2,EEF1B2,EEF1D,EEF1G,EEF2,EEFSEC,EIF2S1,EIF2S2,EIF4A1,ELAVL1,ESRRA,ETF1,EWSR1,FAM103A1,FLNA,…
GO:0046483	heterocycle metabolic process	214	4716	4.04e-53	ENSP00000199320,ENSP00000204517,ENSP00000216038,ENSP00000216122,ENSP00000216297,ENSP00000216714,ENSP00000221419,ENSP00000224073,ENSP00000225298,ENSP00000225792,ENSP00000228251,ENSP00000230340,ENSP00000240185,ENSP00000246194,ENSP00000250916,ENSP00000253363,ENSP00000254108,ENSP00000254719,ENSP00000257915,ENSP00000260129,ENSP00000261308,ENSP00000261531,ENSP00000261600,ENSP00000262367,ENSP00000262887…	ACACB,ADRM1,ALDOA,ALKBH5,ALYREF,ANP32A,APEX1,ARRB2,ATP5J2,BAZ2A,BCAS2,BTK,BYSL,CARM1,CBFB,CBX3,CDK1,CELF1,CELF2,CHAF1A,CHAF1B,CHD1L,CHD7,CHD9,CHEK1,CMPK1,CNBP,CPSF6,CPSF7,CREBBP,CRTC3,CSTF3,CXXC1,DDB1,DDX1,DDX17,DDX21,DDX39B,DDX3X,DDX5,DDX52,DDX6,DEK,DHX15,DIMT1,DKC1,DNAJC2,DNMT1,EBNA1BP2,EDF1,EEF1A1,EEF1D,EIF4A1,ELAVL1,ESRRA,ETF1,EWSR1,FAM103A1,FLNA,FMR1,FUS,G3BP1,GTF2B,GTF2I,HDAC2,HELLS,HMGA1,H…
GO:0006725	cellular aromatic compound metabolic process	214	4754	1.31e-52	ENSP00000199320,ENSP00000204517,ENSP00000216038,ENSP00000216122,ENSP00000216297,ENSP00000216714,ENSP00000221419,ENSP00000224073,ENSP00000225298,ENSP00000225792,ENSP00000228251,ENSP00000230340,ENSP00000240185,ENSP00000246194,ENSP00000250916,ENSP00000253363,ENSP00000254108,ENSP00000254719,ENSP00000257915,ENSP00000260129,ENSP00000261308,ENSP00000261531,ENSP00000261600,ENSP00000262367,ENSP00000262887…	ACACB,ADRM1,ALDOA,ALKBH5,ALYREF,ANP32A,APEX1,ARRB2,ATP5J2,BAZ2A,BCAS2,BTK,BYSL,CARM1,CBFB,CBX3,CDK1,CELF1,CELF2,CHAF1A,CHAF1B,CHD1L,CHD7,CHD9,CHEK1,CMPK1,CNBP,CPSF6,CPSF7,CREBBP,CRTC3,CSTF3,CXXC1,DDB1,DDX1,DDX17,DDX21,DDX39B,DDX3X,DDX5,DDX52,DDX6,DEK,DHX15,DIMT1,DKC1,DNAJC2,DNMT1,EBNA1BP2,EDF1,EEF1A1,EEF1D,EIF4A1,ELAVL1,ESRRA,ETF1,EWSR1,FAM103A1,FLNA,FMR1,FUS,G3BP1,GTF2B,GTF2I,HDAC2,HELLS,HMGA1,H…
GO:1901360	organic cyclic compound metabolic process	215	4963	3.42e-50	ENSP00000199320,ENSP00000204517,ENSP00000216038,ENSP00000216122,ENSP00000216297,ENSP00000216714,ENSP00000221419,ENSP00000224073,ENSP00000225298,ENSP00000225792,ENSP00000228251,ENSP00000230340,ENSP00000240185,ENSP00000246194,ENSP00000250916,ENSP00000253363,ENSP00000254108,ENSP00000254719,ENSP00000257915,ENSP00000260129,ENSP00000261308,ENSP00000261531,ENSP00000261600,ENSP00000262367,ENSP00000262887…	ACACB,ADRM1,ALDOA,ALKBH5,ALYREF,ANP32A,APEX1,ARRB2,ATP5J2,BAZ2A,BCAS2,BTK,BYSL,CARM1,CBFB,CBX3,CDK1,CELF1,CELF2,CHAF1A,CHAF1B,CHD1L,CHD7,CHD9,CHEK1,CMPK1,CNBP,CPSF6,CPSF7,CREBBP,CRTC3,CSTF3,CXXC1,DDB1,DDX1,DDX17,DDX21,DDX39B,DDX3X,DDX5,DDX52,DDX6,DEK,DHX15,DIMT1,DKC1,DNAJC2,DNMT1,EBNA1BP2,EDF1,EEF1A1,EEF1D,EIF4A1,ELAVL1,ESRRA,ETF1,EWSR1,FAM103A1,FLNA,FMR1,FUS,G3BP1,GTF2B,GTF2I,HDAC2,HDLBP,HELLS,H…
GO:0010467	gene expression	183	3733	1.87e-46	ENSP00000199320,ENSP00000204517,ENSP00000216038,ENSP00000216297,ENSP00000216714,ENSP00000217182,ENSP00000221419,ENSP00000224073,ENSP00000225298,ENSP00000225792,ENSP00000228251,ENSP00000230340,ENSP00000240185,ENSP00000246194,ENSP00000250916,ENSP00000253363,ENSP00000254108,ENSP00000254730,ENSP00000256383,ENSP00000257915,ENSP00000260129,ENSP00000261308,ENSP00000261531,ENSP00000261600,ENSP00000262367…	ADRM1,ALKBH5,ALYREF,ANP32A,APEX1,ARRB2,BAZ2A,BCAS2,BTK,BYSL,CARM1,CBFB,CBX3,CELF1,CELF2,CHAF1B,CHD7,CHD9,CNBP,CPSF6,CPSF7,CREBBP,CRTC3,CSTF3,CXXC1,DDX1,DDX17,DDX21,DDX39B,DDX3X,DDX5,DDX52,DEK,DHX15,DIMT1,DKC1,DNAJC2,DNMT1,EBNA1BP2,EDF1,EEF1A1,EEF1A2,EEF1B2,EEF1D,EEF1G,EEF2,EEFSEC,EIF2S1,EIF2S2,EIF4A1,ELAVL1,ESRRA,ETF1,EWSR1,FAM103A1,FLNA,FMR1,FUS,GADD45GIP1,GNB2L1,GTF2B,GTF2I,HDAC2,HELLS,HMGA1,HM…
GO:0016070	RNA metabolic process	175	3430	5.93e-46	ENSP00000199320,ENSP00000204517,ENSP00000216038,ENSP00000216297,ENSP00000216714,ENSP00000221419,ENSP00000224073,ENSP00000225298,ENSP00000225792,ENSP00000228251,ENSP00000230340,ENSP00000240185,ENSP00000246194,ENSP00000250916,ENSP00000253363,ENSP00000254108,ENSP00000257915,ENSP00000260129,ENSP00000261308,ENSP00000261531,ENSP00000261600,ENSP00000262367,ENSP00000263274,ENSP00000265073,ENSP00000265866…	ADRM1,ALKBH5,ALYREF,ANP32A,APEX1,ARRB2,BAZ2A,BCAS2,BTK,BYSL,CARM1,CBFB,CBX3,CELF1,CELF2,CHAF1B,CHD7,CHD9,CNBP,CPSF6,CPSF7,CREBBP,CRTC3,CSTF3,CXXC1,DDX1,DDX17,DDX21,DDX39B,DDX3X,DDX5,DDX52,DDX6,DEK,DHX15,DIMT1,DKC1,DNAJC2,DNMT1,EBNA1BP2,EDF1,EEF1A1,EEF1D,EIF4A1,ELAVL1,ESRRA,ETF1,EWSR1,FAM103A1,FLNA,FMR1,FUS,GTF2B,GTF2I,HDAC2,HELLS,HMGA1,HMGA2,HMGB2,HMGB3,HNRNPA0,HNRNPA1,HNRNPA2B1,HNRNPA3,HNRNPD,HN…
GO:0043170	macromolecule metabolic process	253	7453	2.54e-45	ENSP00000199320,ENSP00000204517,ENSP00000216038,ENSP00000216122,ENSP00000216181,ENSP00000216297,ENSP00000216639,ENSP00000216714,ENSP00000217182,ENSP00000221419,ENSP00000224073,ENSP00000225298,ENSP00000225792,ENSP00000228251,ENSP00000230340,ENSP00000231004,ENSP00000240185,ENSP00000246194,ENSP00000250916,ENSP00000253363,ENSP00000254108,ENSP00000254719,ENSP00000254730,ENSP00000256383,ENSP00000257915…	ADRM1,AKT2,ALKBH5,ALYREF,ANP32A,APEX1,ARRB2,AURKB,BAZ2A,BCAS2,BTK,BYSL,C4orf27,CALM1,CARM1,CBFB,CBX3,CDC20,CDK1,CELF1,CELF2,CHAF1A,CHAF1B,CHD1L,CHD7,CHD9,CHEK1,CNBP,CPSF6,CPSF7,CREBBP,CRTC3,CSTF3,CXXC1,DDB1,DDX1,DDX17,DDX21,DDX39B,DDX3X,DDX5,DDX52,DDX6,DEK,DHX15,DIMT1,DKC1,DNAJC2,DNM2,DNMT1,EBNA1BP2,EDF1,EEF1A1,EEF1A2,EEF1B2,EEF1D,EEF1G,EEF2,EEFSEC,EIF2S1,EIF2S2,EIF4A1,ELAVL1,ESRRA,ETF1,EWSR1,FAM…
GO:0010468	regulation of gene expression	191	4533	8.6e-40	ENSP00000199320,ENSP00000204517,ENSP00000216181,ENSP00000216297,ENSP00000216714,ENSP00000221419,ENSP00000224073,ENSP00000225792,ENSP00000228251,ENSP00000233078,ENSP00000240185,ENSP00000246194,ENSP00000250113,ENSP00000250916,ENSP00000253363,ENSP00000254108,ENSP00000254730,ENSP00000256383,ENSP00000257915,ENSP00000260129,ENSP00000261531,ENSP00000261600,ENSP00000262367,ENSP00000265073,ENSP00000266679…	ACACB,AHNAK,AKT2,ALYREF,ANP32A,APEX1,ARRB2,AURKB,BAZ2A,BTK,CARM1,CBFB,CBX3,CDK1,CELF1,CHAF1B,CHD7,CHD9,CHEK1,CNBP,CPSF6,CPSF7,CREBBP,CRTC3,CXXC1,DAZAP1,DDX1,DDX17,DDX21,DDX39B,DDX3X,DDX5,DDX6,DEK,DIMT1,DKC1,DNAJC2,DNM2,DNMT1,EDF1,EEF1A1,EEF1D,EEF2,EEFSEC,EIF2S1,EIF4A1,ELAVL1,ESRRA,ETF1,EWSR1,FAM58A,FAM83G,FAM98B,FLNA,FMR1,FUS,FXR2,GNB2L1,GTF2B,GTF2I,HDAC2,HELLS,HIST1H1C,HIST1H1E,HIST2H2AC,HMGA1,H…
GO:0006807	nitrogen compound metabolic process	258	8349	6.38e-39	ENSP00000199320,ENSP00000204517,ENSP00000216038,ENSP00000216122,ENSP00000216181,ENSP00000216297,ENSP00000216639,ENSP00000216714,ENSP00000217182,ENSP00000221419,ENSP00000224073,ENSP00000225298,ENSP00000225792,ENSP00000228251,ENSP00000230340,ENSP00000231004,ENSP00000240185,ENSP00000246194,ENSP00000250916,ENSP00000253363,ENSP00000254108,ENSP00000254719,ENSP00000254730,ENSP00000256383,ENSP00000257915…	ACACB,ADRM1,AKT2,ALDOA,ALKBH5,ALYREF,ANP32A,APEX1,ARRB2,ATP5J2,AURKB,BAZ2A,BCAS2,BTK,BYSL,C4orf27,CALM1,CARM1,CBFB,CBX3,CDC20,CDK1,CELF1,CELF2,CHAF1A,CHAF1B,CHD1L,CHD7,CHD9,CHEK1,CMPK1,CNBP,CPSF6,CPSF7,CREBBP,CRTC3,CSTF3,CXXC1,DDB1,DDX1,DDX17,DDX21,DDX39B,DDX3X,DDX5,DDX52,DDX6,DEK,DHX15,DIMT1,DKC1,DNAJC2,DNMT1,EBNA1BP2,EDF1,EEF1A1,EEF1A2,EEF1B2,EEF1D,EEF1G,EEF2,EEFSEC,EIF2S1,EIF2S2,EIF4A1,ELAVL1,…
GO:0044237	cellular metabolic process	264	8797	1.64e-38	ENSP00000199320,ENSP00000204517,ENSP00000216038,ENSP00000216122,ENSP00000216297,ENSP00000216639,ENSP00000216714,ENSP00000217182,ENSP00000221419,ENSP00000224073,ENSP00000225298,ENSP00000225792,ENSP00000228251,ENSP00000229329,ENSP00000230340,ENSP00000231004,ENSP00000240185,ENSP00000246194,ENSP00000250916,ENSP00000253363,ENSP00000254108,ENSP00000254719,ENSP00000254730,ENSP00000256383,ENSP00000257915…	ACACB,ADRM1,AKT2,ALDOA,ALKBH5,ALYREF,ANP32A,APEX1,ARRB2,ATP5J2,AURKB,BAZ2A,BCAS2,BTK,BYSL,C4orf27,CALM1,CARM1,CBFB,CBX3,CDC20,CDK1,CELF1,CELF2,CHAF1A,CHAF1B,CHD1L,CHD7,CHD9,CHEK1,CMAS,CMPK1,CNBP,CPSF6,CPSF7,CREBBP,CRTC3,CS,CSTF3,CXXC1,DDB1,DDX1,DDX17,DDX21,DDX39B,DDX3X,DDX5,DDX52,DDX6,DEK,DHX15,DIMT1,DKC1,DNAJC2,DNM2,DNMT1,EBNA1BP2,EDF1,EEF1A1,EEF1A2,EEF1B2,EEF1D,EEF1G,EEF2,EEFSEC,EIF2S1,EIF2S2,E…
GO:0071704	organic substance metabolic process	268	9135	6.09e-38	ENSP00000199320,ENSP00000204517,ENSP00000216038,ENSP00000216122,ENSP00000216181,ENSP00000216297,ENSP00000216639,ENSP00000216714,ENSP00000217182,ENSP00000221419,ENSP00000224073,ENSP00000225298,ENSP00000225792,ENSP00000228251,ENSP00000229329,ENSP00000230340,ENSP00000231004,ENSP00000240185,ENSP00000246194,ENSP00000250916,ENSP00000253363,ENSP00000254108,ENSP00000254719,ENSP00000254730,ENSP00000256383…	ACACB,ADRM1,AKT2,ALDOA,ALKBH5,ALYREF,ANP32A,APEX1,ARRB2,ATP5J2,AURKB,BAZ2A,BCAS2,BTK,BYSL,C4orf27,CALM1,CARM1,CBFB,CBX3,CDC20,CDK1,CELF1,CELF2,CHAF1A,CHAF1B,CHD1L,CHD7,CHD9,CHEK1,CMAS,CMPK1,CNBP,CPSF6,CPSF7,CREBBP,CRTC3,CS,CSTF3,CXXC1,DDB1,DDX1,DDX17,DDX21,DDX39B,DDX3X,DDX5,DDX52,DDX6,DEK,DHX15,DIMT1,DKC1,DNAJC2,DNM2,DNMT1,EBNA1BP2,EDF1,EEF1A1,EEF1A2,EEF1B2,EEF1D,EEF1G,EEF2,EEFSEC,EIF2S1,EIF2S2,E…
GO:0044238	primary metabolic process	262	8808	4.65e-37	ENSP00000199320,ENSP00000204517,ENSP00000216038,ENSP00000216122,ENSP00000216181,ENSP00000216297,ENSP00000216639,ENSP00000216714,ENSP00000217182,ENSP00000221419,ENSP00000224073,ENSP00000225298,ENSP00000225792,ENSP00000228251,ENSP00000230340,ENSP00000231004,ENSP00000240185,ENSP00000246194,ENSP00000250916,ENSP00000253363,ENSP00000254108,ENSP00000254719,ENSP00000254730,ENSP00000256383,ENSP00000257915…	ACACB,ADRM1,AKT2,ALDOA,ALKBH5,ALYREF,ANP32A,APEX1,ARRB2,ATP5J2,AURKB,BAZ2A,BCAS2,BTK,BYSL,C4orf27,CALM1,CARM1,CBFB,CBX3,CDC20,CDK1,CELF1,CELF2,CHAF1A,CHAF1B,CHD1L,CHD7,CHD9,CHEK1,CMPK1,CNBP,CPSF6,CPSF7,CREBBP,CRTC3,CS,CSTF3,CXXC1,DDB1,DDX1,DDX17,DDX21,DDX39B,DDX3X,DDX5,DDX52,DDX6,DEK,DHX15,DIMT1,DKC1,DNAJC2,DNMT1,EBNA1BP2,EDF1,EEF1A1,EEF1A2,EEF1B2,EEF1D,EEF1G,EEF2,EEFSEC,EIF2S1,EIF2S2,EIF4A1,ELAV…
GO:0060255	regulation of macromolecule metabolic process	217	6072	4.65e-37	ENSP00000199320,ENSP00000204517,ENSP00000216181,ENSP00000216297,ENSP00000216714,ENSP00000217182,ENSP00000220325,ENSP00000221419,ENSP00000224073,ENSP00000225792,ENSP00000228251,ENSP00000233078,ENSP00000240185,ENSP00000246194,ENSP00000250113,ENSP00000250916,ENSP00000253363,ENSP00000254108,ENSP00000254730,ENSP00000256383,ENSP00000257915,ENSP00000260129,ENSP00000261531,ENSP00000261600,ENSP00000262367…	ACACB,ADRM1,AHNAK,AKT2,ALYREF,ANP32A,APEX1,ARRB2,AURKB,BAZ2A,BTK,C4orf27,CALM1,CARM1,CBFB,CBX3,CDC20,CDK1,CELF1,CHAF1B,CHD7,CHD9,CHEK1,CNBP,CPSF6,CPSF7,CREBBP,CRTC3,CXXC1,DAZAP1,DDB1,DDX1,DDX17,DDX21,DDX39B,DDX3X,DDX5,DDX6,DEK,DIMT1,DKC1,DNAJC2,DNM2,DNMT1,EDF1,EEF1A1,EEF1A2,EEF1D,EEF2,EEFSEC,EHD4,EIF2S1,EIF4A1,ELAVL1,ESRRA,ETF1,EWSR1,FAM58A,FAM83G,FAM98B,FLNA,FMR1,FUS,FXR2,GNB2L1,GNL3L,GRB2,GTF2B…
GO:0016071	mRNA metabolic process	76	667	9.06e-37	ENSP00000221419,ENSP00000225792,ENSP00000240185,ENSP00000246194,ENSP00000253363,ENSP00000254108,ENSP00000257915,ENSP00000260129,ENSP00000261308,ENSP00000261531,ENSP00000261600,ENSP00000265866,ENSP00000266679,ENSP00000276079,ENSP00000278572,ENSP00000283179,ENSP00000293677,ENSP00000307181,ENSP00000307863,ENSP00000307889,ENSP00000311677,ENSP00000313199,ENSP00000315791,ENSP00000316042,ENSP00000326261…	ALKBH5,ALYREF,BCAS2,CELF1,CELF2,CPSF6,CPSF7,CSTF3,DDX1,DDX17,DDX39B,DDX5,DDX6,DHX15,DKC1,EEF1D,ELAVL1,ETF1,FAM103A1,FLNA,FMR1,FUS,HNRNPA0,HNRNPA1,HNRNPA2B1,HNRNPA3,HNRNPD,HNRNPH1,HNRNPH3,HNRNPL,HNRNPLL,HNRNPU,HNRNPUL1,KDM1A,NONO,PCBP2,PPP1R8,PPWD1,PRPF4,PRPF8,PSIP1,PSPC1,RALY,RAVER1,RBM39,RBMX,RNGTT,RNMT,RPL13,RPL13A,RPL27,RPL7A,RPLP0,RPS13,RPS18,RPS27,RPS3,RPS7,RPSA,SARNP,SF1,SF3B5,SFPQ,SMNDC1,S…
GO:0008152	metabolic process	271	9569	7.33e-36	ENSP00000199320,ENSP00000204517,ENSP00000216038,ENSP00000216122,ENSP00000216181,ENSP00000216297,ENSP00000216639,ENSP00000216714,ENSP00000217182,ENSP00000221419,ENSP00000224073,ENSP00000225298,ENSP00000225792,ENSP00000228251,ENSP00000229329,ENSP00000230340,ENSP00000231004,ENSP00000240185,ENSP00000246194,ENSP00000250916,ENSP00000253363,ENSP00000254108,ENSP00000254719,ENSP00000254730,ENSP00000256383…	ACACB,ADRM1,AKT2,ALDOA,ALKBH5,ALYREF,ANP32A,APEX1,ARRB2,ATP5J2,AURKB,BAZ2A,BCAS2,BTK,BYSL,C4orf27,CALM1,CARM1,CBFB,CBX3,CDC20,CDK1,CELF1,CELF2,CENPV,CHAF1A,CHAF1B,CHD1L,CHD7,CHD9,CHEK1,CMAS,CMPK1,CNBP,CPSF6,CPSF7,CREBBP,CRTC3,CS,CSTF3,CXXC1,DDB1,DDX1,DDX17,DDX21,DDX39B,DDX3X,DDX5,DDX52,DDX6,DEK,DHX15,DIMT1,DKC1,DNAJC2,DNM2,DNMT1,EBNA1BP2,EDF1,EEF1A1,EEF1A2,EEF1B2,EEF1D,EEF1G,EEF2,EEFSEC,EIF2S1,EI…
GO:0006396	RNA processing	80	825	2.46e-34	ENSP00000199320,ENSP00000216038,ENSP00000221419,ENSP00000225298,ENSP00000225792,ENSP00000230340,ENSP00000240185,ENSP00000246194,ENSP00000253363,ENSP00000254108,ENSP00000260129,ENSP00000261308,ENSP00000261531,ENSP00000261600,ENSP00000265866,ENSP00000266679,ENSP00000276079,ENSP00000283179,ENSP00000293677,ENSP00000301364,ENSP00000302886,ENSP00000306565,ENSP00000307181,ENSP00000307863,ENSP00000309126…	ALKBH5,ALYREF,BCAS2,BYSL,CELF1,CELF2,CHD7,CPSF6,CPSF7,CSTF3,DDX1,DDX17,DDX21,DDX39B,DDX5,DDX52,DHX15,DIMT1,DKC1,EBNA1BP2,ELAVL1,FAM103A1,FMR1,FUS,HNRNPA0,HNRNPA1,HNRNPA2B1,HNRNPA3,HNRNPD,HNRNPDL,HNRNPH1,HNRNPH3,HNRNPL,HNRNPLL,HNRNPU,HNRNPUL1,ISG20,KDM1A,LARP7,LYAR,NONO,NSUN5,PA2G4,PCBP2,PPP1R8,PPWD1,PRPF4,PRPF8,PSIP1,PSPC1,RALY,RAVER1,RBM39,RBMX,REXO4,RNGTT,RNMT,RPL27,RPL7A,RPS27,RPS7,RPSA,RTCB,S…
GO:0019222	regulation of metabolic process	219	6516	2.13e-33	ENSP00000199320,ENSP00000204517,ENSP00000216181,ENSP00000216297,ENSP00000216714,ENSP00000217182,ENSP00000220325,ENSP00000221419,ENSP00000224073,ENSP00000225792,ENSP00000228251,ENSP00000233078,ENSP00000240185,ENSP00000246194,ENSP00000250113,ENSP00000250916,ENSP00000253363,ENSP00000254108,ENSP00000254730,ENSP00000256383,ENSP00000257915,ENSP00000260129,ENSP00000261531,ENSP00000261600,ENSP00000262367…	ACACB,ADRM1,AHNAK,AKT2,ALYREF,ANP32A,APEX1,ARRB2,AURKB,BAZ2A,BTK,C4orf27,CALM1,CARM1,CBFB,CBX3,CDC20,CDK1,CELF1,CHAF1B,CHD7,CHD9,CHEK1,CNBP,CPSF6,CPSF7,CREBBP,CRTC3,CXXC1,DAZAP1,DDB1,DDX1,DDX17,DDX21,DDX39B,DDX3X,DDX5,DDX6,DEK,DIMT1,DKC1,DNAJC2,DNM2,DNMT1,EDF1,EEF1A1,EEF1A2,EEF1D,EEF2,EEFSEC,EHD4,EIF2S1,EIF4A1,ELAVL1,ESRRA,ETF1,EWSR1,FAM58A,FAM83G,FAM98B,FLNA,FMR1,FUS,FXR2,GNB2L1,GNL3L,GRB2,GTF2B…
GO:0019219	regulation of nucleobase-containing compound metabolic process	170	4133	2.9e-32	ENSP00000199320,ENSP00000204517,ENSP00000216297,ENSP00000216714,ENSP00000221419,ENSP00000224073,ENSP00000225792,ENSP00000228251,ENSP00000233078,ENSP00000240185,ENSP00000246194,ENSP00000250916,ENSP00000253363,ENSP00000254108,ENSP00000257915,ENSP00000260129,ENSP00000261531,ENSP00000261600,ENSP00000262367,ENSP00000262887,ENSP00000265073,ENSP00000265433,ENSP00000266679,ENSP00000266732,ENSP00000268184…	AHNAK,ALYREF,ANP32A,APEX1,ARRB2,AURKB,BAZ2A,BTK,CARM1,CBFB,CBX3,CDK1,CELF1,CHAF1B,CHD7,CHD9,CHEK1,CNBP,CPSF6,CPSF7,CREBBP,CRTC3,CXXC1,DAZAP1,DDX1,DDX17,DDX39B,DDX3X,DDX5,DEK,DIMT1,DKC1,DNAJC2,DNM2,DNMT1,EDF1,EEF1A1,EEF1D,ELAVL1,ESRRA,EWSR1,FAM58A,FAM83G,FLNA,FMR1,FUS,GNL3L,GTF2B,GTF2I,HDAC2,HELLS,HIST1H1C,HIST1H1E,HIST2H2AC,HMGA1,HMGA2,HMGB2,HMGB3,HNRNPA0,HNRNPA1,HNRNPA2B1,HNRNPD,HNRNPDL,HNRNPH1,…
GO:0044260	cellular macromolecule metabolic process	215	6413	3.85e-32	ENSP00000199320,ENSP00000204517,ENSP00000216122,ENSP00000216297,ENSP00000216639,ENSP00000216714,ENSP00000217182,ENSP00000224073,ENSP00000225792,ENSP00000228251,ENSP00000231004,ENSP00000240185,ENSP00000246194,ENSP00000250916,ENSP00000253363,ENSP00000254719,ENSP00000254730,ENSP00000256383,ENSP00000257915,ENSP00000260129,ENSP00000261308,ENSP00000261531,ENSP00000261600,ENSP00000262367,ENSP00000262887…	ADRM1,AKT2,ALKBH5,ALYREF,ANP32A,APEX1,ARRB2,AURKB,BAZ2A,BTK,C4orf27,CALM1,CARM1,CBFB,CBX3,CDC20,CDK1,CHAF1A,CHAF1B,CHD1L,CHD7,CHD9,CHEK1,CNBP,CPSF7,CREBBP,CRTC3,CSTF3,CXXC1,DDB1,DDX1,DDX17,DDX21,DDX3X,DDX5,DDX6,DEK,DIMT1,DKC1,DNAJC2,DNM2,DNMT1,EDF1,EEF1A1,EEF1A2,EEF1B2,EEF1D,EEF1G,EEF2,EEFSEC,EIF2S1,EIF2S2,EIF4A1,ESRRA,ETF1,EWSR1,FAM103A1,FAM98B,FLNA,GADD45GIP1,GNB2L1,GRB2,GTF2B,GTF2I,HDAC2,HELLS…
GO:0034645	cellular macromolecule biosynthetic process	154	3518	4.87e-31	ENSP00000204517,ENSP00000216122,ENSP00000216297,ENSP00000216714,ENSP00000217182,ENSP00000224073,ENSP00000225792,ENSP00000228251,ENSP00000240185,ENSP00000246194,ENSP00000250916,ENSP00000253363,ENSP00000254719,ENSP00000254730,ENSP00000256383,ENSP00000257915,ENSP00000260129,ENSP00000261531,ENSP00000261600,ENSP00000262367,ENSP00000263274,ENSP00000265073,ENSP00000265433,ENSP00000268184,ENSP00000271555…	ADRM1,AKT2,ALYREF,ANP32A,APEX1,ARRB2,BAZ2A,BTK,CARM1,CBFB,CBX3,CDK1,CHAF1A,CHAF1B,CHD7,CHD9,CHEK1,CNBP,CPSF7,CREBBP,CRTC3,CSTF3,CXXC1,DDX1,DDX17,DDX21,DDX3X,DDX5,DEK,DKC1,DNAJC2,DNMT1,EDF1,EEF1A1,EEF1A2,EEF1B2,EEF1D,EEF1G,EEF2,EEFSEC,EIF2S1,EIF2S2,EIF4A1,ESRRA,ETF1,EWSR1,FLNA,GADD45GIP1,GNB2L1,GTF2B,GTF2I,HDAC2,HELLS,HMGA1,HMGA2,HMGB2,HMGB3,HNRNPD,HNRNPDL,HNRNPU,HNRNPUL1,HOXC10,ILF3,ING2,ING3,ING…
GO:2000112	regulation of cellular macromolecule biosynthetic process	163	4050	2.76e-29	ENSP00000204517,ENSP00000216297,ENSP00000216714,ENSP00000221419,ENSP00000224073,ENSP00000225792,ENSP00000228251,ENSP00000240185,ENSP00000246194,ENSP00000250113,ENSP00000250916,ENSP00000253363,ENSP00000254108,ENSP00000254730,ENSP00000256383,ENSP00000257915,ENSP00000260129,ENSP00000261531,ENSP00000261600,ENSP00000262367,ENSP00000265073,ENSP00000265433,ENSP00000266732,ENSP00000268184,ENSP00000271555…	AKT2,ALYREF,ANP32A,APEX1,ARRB2,AURKB,BAZ2A,BTK,CARM1,CBFB,CBX3,CDK1,CELF1,CHAF1B,CHD7,CHD9,CHEK1,CNBP,CREBBP,CRTC3,CXXC1,DDX1,DDX17,DDX39B,DDX3X,DDX5,DDX6,DEK,DKC1,DNAJC2,DNM2,DNMT1,EDF1,EEF1A1,EEF1D,EEF2,EEFSEC,EIF2S1,ELAVL1,ESRRA,ETF1,EWSR1,FAM58A,FAM83G,FLNA,FMR1,FUS,FXR2,GNB2L1,GNL3L,GTF2B,GTF2I,HDAC2,HELLS,HIST1H1C,HIST1H1E,HIST2H2AC,HMGA1,HMGA2,HMGB2,HMGB3,HNRNPA1,HNRNPA2B1,HNRNPD,HNRNPDL,H…
GO:0051171	regulation of nitrogen compound metabolic process	199	5827	3.26e-29	ENSP00000199320,ENSP00000204517,ENSP00000216181,ENSP00000216297,ENSP00000216714,ENSP00000217182,ENSP00000220325,ENSP00000221419,ENSP00000224073,ENSP00000225792,ENSP00000228251,ENSP00000233078,ENSP00000240185,ENSP00000246194,ENSP00000250113,ENSP00000250916,ENSP00000253363,ENSP00000254108,ENSP00000254730,ENSP00000256383,ENSP00000257915,ENSP00000260129,ENSP00000261531,ENSP00000261600,ENSP00000262367…	ADRM1,AHNAK,AKT2,ALYREF,ANP32A,APEX1,ARRB2,AURKB,BAZ2A,BTK,C4orf27,CALM1,CARM1,CBFB,CBX3,CDC20,CDK1,CELF1,CHAF1B,CHD7,CHD9,CHEK1,CNBP,CPSF6,CPSF7,CREBBP,CRTC3,CXXC1,DAZAP1,DDB1,DDX1,DDX17,DDX39B,DDX3X,DDX5,DDX6,DEK,DIMT1,DKC1,DNAJC2,DNM2,DNMT1,EDF1,EEF1A1,EEF1A2,EEF1D,EEF2,EEFSEC,EHD4,EIF2S1,ELAVL1,ESRRA,ETF1,EWSR1,FAM58A,FAM83G,FLNA,FMR1,FUS,FXR2,GNB2L1,GNL3L,GRB2,GTF2B,GTF2I,HDAC2,HELLS,HIST1H1…
GO:0051276	chromosome organization	80	999	4.28e-29	ENSP00000216297,ENSP00000216639,ENSP00000216714,ENSP00000254719,ENSP00000262367,ENSP00000262887,ENSP00000265433,ENSP00000283131,ENSP00000283179,ENSP00000287239,ENSP00000287437,ENSP00000296503,ENSP00000296930,ENSP00000299736,ENSP00000300093,ENSP00000301280,ENSP00000301764,ENSP00000307183,ENSP00000307705,ENSP00000311747,ENSP00000312625,ENSP00000313851,ENSP00000313950,ENSP00000315700,ENSP00000318297…	APEX1,AURKB,BAZ2A,CARM1,CBX3,CDC20,CDK1,CENPV,CHAF1A,CHAF1B,CHD1L,CHD7,CHD9,CHEK1,CREBBP,CXXC1,DDB1,DDX1,DDX3X,DEK,DKC1,DNAJC2,DNMT1,G3BP1,HDAC2,HELLS,HIST1H1C,HIST1H1E,HIST1H2BF,HIST2H2AC,HMGA1,HMGA2,HMGB2,HMGB3,HNRNPA2B1,HNRNPU,HP1BP3,ING2,ING3,ING4,KAT6B,KDM1A,KIF2C,MORF4L2,MTF2,NAP1L1,NBN,NCOA3,NPM1,NSD1,NSMCE2,PARP1,PDS5B,PHF8,PLK1,POLD2,PURA,RAD54B,RBBP7,RBM14,RECQL,RNF20,RPA1,RUVBL1,RUVBL2…
GO:0006397	mRNA processing	57	456	6.65e-29	ENSP00000221419,ENSP00000225792,ENSP00000240185,ENSP00000246194,ENSP00000253363,ENSP00000254108,ENSP00000260129,ENSP00000261308,ENSP00000261531,ENSP00000261600,ENSP00000265866,ENSP00000266679,ENSP00000276079,ENSP00000283179,ENSP00000293677,ENSP00000307181,ENSP00000307863,ENSP00000311677,ENSP00000313199,ENSP00000315791,ENSP00000316042,ENSP00000326261,ENSP00000336741,ENSP00000337632,ENSP00000341826…	ALKBH5,ALYREF,BCAS2,CELF1,CELF2,CPSF6,CPSF7,CSTF3,DDX1,DDX17,DDX39B,DDX5,DHX15,ELAVL1,FAM103A1,FMR1,FUS,HNRNPA0,HNRNPA1,HNRNPA2B1,HNRNPA3,HNRNPD,HNRNPH1,HNRNPH3,HNRNPL,HNRNPLL,HNRNPU,HNRNPUL1,KDM1A,NONO,PCBP2,PPP1R8,PPWD1,PRPF4,PRPF8,PSIP1,PSPC1,RALY,RAVER1,RBM39,RBMX,RNGTT,RNMT,SARNP,SF1,SF3B5,SFPQ,SMNDC1,SNW1,SRRM1,SYNCRIP,TARDBP,TGS1,THOC1,THOC5,U2AF2,XRN2
GO:0044271	cellular nitrogen compound biosynthetic process	150	3528	1.24e-28	ENSP00000204517,ENSP00000216297,ENSP00000216714,ENSP00000217182,ENSP00000224073,ENSP00000225792,ENSP00000228251,ENSP00000240185,ENSP00000246194,ENSP00000250916,ENSP00000253363,ENSP00000254719,ENSP00000254730,ENSP00000256383,ENSP00000257915,ENSP00000260129,ENSP00000261531,ENSP00000261600,ENSP00000262367,ENSP00000263274,ENSP00000265073,ENSP00000268184,ENSP00000271555,ENSP00000276079,ENSP00000278412…	ACACB,ADRM1,ALDOA,ANP32A,APEX1,ARRB2,ATP5J2,BAZ2A,BTK,CARM1,CBFB,CBX3,CHAF1B,CHD7,CHD9,CMPK1,CNBP,CPSF7,CREBBP,CRTC3,CSTF3,CXXC1,DDX1,DDX17,DDX21,DDX3X,DDX5,DEK,DKC1,DNAJC2,DNMT1,EDF1,EEF1A1,EEF1A2,EEF1B2,EEF1D,EEF1G,EEF2,EEFSEC,EIF2S1,EIF2S2,EIF4A1,ESRRA,ETF1,EWSR1,FLNA,GADD45GIP1,GNB2L1,GTF2B,GTF2I,HDAC2,HELLS,HMGA1,HMGA2,HMGB2,HMGB3,HNRNPD,HNRNPDL,HNRNPU,HNRNPUL1,HOXC10,ILF3,IMPDH2,ING2,ING3,K…
GO:0080090	regulation of primary metabolic process	200	5982	3.32e-28	ENSP00000199320,ENSP00000204517,ENSP00000216181,ENSP00000216297,ENSP00000216714,ENSP00000217182,ENSP00000220325,ENSP00000221419,ENSP00000224073,ENSP00000225792,ENSP00000228251,ENSP00000233078,ENSP00000240185,ENSP00000246194,ENSP00000250113,ENSP00000250916,ENSP00000253363,ENSP00000254108,ENSP00000254730,ENSP00000256383,ENSP00000257915,ENSP00000260129,ENSP00000261531,ENSP00000261600,ENSP00000262367…	ACACB,ADRM1,AHNAK,AKT2,ALYREF,ANP32A,APEX1,ARRB2,AURKB,BAZ2A,BTK,C4orf27,CALM1,CARM1,CBFB,CBX3,CDC20,CDK1,CELF1,CHAF1B,CHD7,CHD9,CHEK1,CNBP,CPSF6,CPSF7,CREBBP,CRTC3,CXXC1,DAZAP1,DDB1,DDX1,DDX17,DDX39B,DDX3X,DDX5,DDX6,DEK,DIMT1,DKC1,DNAJC2,DNM2,DNMT1,EDF1,EEF1A1,EEF1A2,EEF1D,EEF2,EEFSEC,EHD4,EIF2S1,ELAVL1,ESRRA,ETF1,EWSR1,FAM58A,FAM83G,FLNA,FMR1,FUS,FXR2,GNB2L1,GNL3L,GRB2,GTF2B,GTF2I,HDAC2,HELLS,H…
GO:0051252	regulation of RNA metabolic process	157	3890	5.5e-28	ENSP00000199320,ENSP00000204517,ENSP00000216297,ENSP00000216714,ENSP00000221419,ENSP00000224073,ENSP00000225792,ENSP00000228251,ENSP00000233078,ENSP00000240185,ENSP00000246194,ENSP00000250916,ENSP00000253363,ENSP00000254108,ENSP00000257915,ENSP00000260129,ENSP00000261531,ENSP00000261600,ENSP00000262367,ENSP00000265073,ENSP00000266679,ENSP00000266732,ENSP00000268184,ENSP00000271555,ENSP00000276079…	AHNAK,ALYREF,ANP32A,APEX1,ARRB2,AURKB,BAZ2A,BTK,CARM1,CBFB,CBX3,CELF1,CHAF1B,CHD7,CHD9,CHEK1,CNBP,CPSF6,CPSF7,CREBBP,CRTC3,CXXC1,DAZAP1,DDX1,DDX17,DDX39B,DDX3X,DDX5,DEK,DIMT1,DKC1,DNAJC2,DNM2,DNMT1,EDF1,EEF1A1,EEF1D,ELAVL1,ESRRA,EWSR1,FAM58A,FAM83G,FLNA,FMR1,FUS,GTF2B,GTF2I,HDAC2,HELLS,HIST1H1C,HIST1H1E,HIST2H2AC,HMGA1,HMGA2,HMGB2,HMGB3,HNRNPA0,HNRNPA1,HNRNPA2B1,HNRNPD,HNRNPDL,HNRNPH1,HNRNPL,HNRN…
GO:0031323	regulation of cellular metabolic process	199	6082	1.08e-26	ENSP00000199320,ENSP00000204517,ENSP00000216181,ENSP00000216297,ENSP00000216714,ENSP00000217182,ENSP00000220325,ENSP00000221419,ENSP00000224073,ENSP00000225792,ENSP00000228251,ENSP00000233078,ENSP00000240185,ENSP00000246194,ENSP00000250113,ENSP00000250916,ENSP00000253363,ENSP00000254108,ENSP00000254730,ENSP00000256383,ENSP00000257915,ENSP00000260129,ENSP00000261531,ENSP00000261600,ENSP00000262367…	ACACB,ADRM1,AHNAK,AKT2,ALYREF,ANP32A,APEX1,ARRB2,AURKB,BAZ2A,BTK,C4orf27,CALM1,CARM1,CBFB,CBX3,CDC20,CDK1,CELF1,CHAF1B,CHD7,CHD9,CHEK1,CNBP,CPSF6,CPSF7,CREBBP,CRTC3,CXXC1,DAZAP1,DDX1,DDX17,DDX39B,DDX3X,DDX5,DDX6,DEK,DIMT1,DKC1,DNAJC2,DNM2,DNMT1,EDF1,EEF1A1,EEF1A2,EEF1D,EEF2,EEFSEC,EHD4,EIF2S1,ELAVL1,ESRRA,ETF1,EWSR1,FAM58A,FAM83G,FLNA,FMR1,FUS,FXR2,GNB2L1,GNL3L,GRB2,GTF2B,GTF2I,HDAC2,HELLS,HIST1H…
GO:0044249	cellular biosynthetic process	169	4567	1.35e-26	ENSP00000204517,ENSP00000216122,ENSP00000216297,ENSP00000216714,ENSP00000217182,ENSP00000224073,ENSP00000225792,ENSP00000228251,ENSP00000240185,ENSP00000246194,ENSP00000250916,ENSP00000253363,ENSP00000254719,ENSP00000254730,ENSP00000256383,ENSP00000257915,ENSP00000260129,ENSP00000261531,ENSP00000261600,ENSP00000262367,ENSP00000263274,ENSP00000265073,ENSP00000265433,ENSP00000268184,ENSP00000271555…	ACACB,ADRM1,AKT2,ALDOA,ALYREF,ANP32A,APEX1,ARRB2,ATP5J2,BAZ2A,BTK,CARM1,CBFB,CBX3,CDK1,CHAF1A,CHAF1B,CHD7,CHD9,CHEK1,CMPK1,CNBP,CPSF7,CREBBP,CRTC3,CSTF3,CXXC1,DDX1,DDX17,DDX21,DDX3X,DDX5,DEK,DKC1,DNAJC2,DNMT1,EDF1,EEF1A1,EEF1A2,EEF1B2,EEF1D,EEF1G,EEF2,EEFSEC,EIF2S1,EIF2S2,EIF4A1,ESRRA,ETF1,EWSR1,FLNA,GADD45GIP1,GNB2L1,GRB2,GTF2B,GTF2I,HDAC2,HELLS,HMGA1,HMGA2,HMGB2,HMGB3,HNRNPD,HNRNPDL,HNRNPU,HNRN…
GO:0009889	regulation of biosynthetic process	164	4337	1.59e-26	ENSP00000204517,ENSP00000216297,ENSP00000216714,ENSP00000221419,ENSP00000224073,ENSP00000225792,ENSP00000228251,ENSP00000240185,ENSP00000246194,ENSP00000250113,ENSP00000250916,ENSP00000253363,ENSP00000254108,ENSP00000254730,ENSP00000256383,ENSP00000257915,ENSP00000260129,ENSP00000261531,ENSP00000261600,ENSP00000262367,ENSP00000265073,ENSP00000265433,ENSP00000266732,ENSP00000268184,ENSP00000271555…	ACACB,AKT2,ALYREF,ANP32A,APEX1,ARRB2,AURKB,BAZ2A,BTK,CARM1,CBFB,CBX3,CDK1,CELF1,CHAF1B,CHD7,CHD9,CHEK1,CNBP,CREBBP,CRTC3,CXXC1,DDX1,DDX17,DDX39B,DDX3X,DDX5,DDX6,DEK,DKC1,DNAJC2,DNM2,DNMT1,EDF1,EEF1A1,EEF1D,EEF2,EEFSEC,EIF2S1,ELAVL1,ESRRA,ETF1,EWSR1,FAM58A,FAM83G,FLNA,FMR1,FUS,FXR2,GNB2L1,GNL3L,GTF2B,GTF2I,HDAC2,HELLS,HIST1H1C,HIST1H1E,HIST2H2AC,HMGA1,HMGA2,HMGB2,HMGB3,HNRNPA1,HNRNPA2B1,HNRNPD,HNR…
GO:0008380	RNA splicing	50	391	1.26e-25	ENSP00000216038,ENSP00000221419,ENSP00000225792,ENSP00000240185,ENSP00000246194,ENSP00000253363,ENSP00000254108,ENSP00000260129,ENSP00000261308,ENSP00000261531,ENSP00000261600,ENSP00000265866,ENSP00000276079,ENSP00000283179,ENSP00000293677,ENSP00000307863,ENSP00000311677,ENSP00000313199,ENSP00000315791,ENSP00000316042,ENSP00000326261,ENSP00000336741,ENSP00000341826,ENSP00000343966,ENSP00000345412…	ALYREF,BCAS2,CELF1,CELF2,CPSF7,CSTF3,DDX1,DDX17,DDX39B,DDX5,DHX15,ELAVL1,FMR1,FUS,HNRNPA0,HNRNPA1,HNRNPA2B1,HNRNPA3,HNRNPD,HNRNPH1,HNRNPH3,HNRNPL,HNRNPU,HNRNPUL1,KDM1A,NONO,PCBP2,PPP1R8,PPWD1,PRPF4,PRPF8,PSIP1,PSPC1,RALY,RAVER1,RBM39,RBMX,RTCB,SF1,SF3B5,SFPQ,SMNDC1,SNW1,SRRM1,SYNCRIP,TARDBP,TGS1,THOC1,THOC5,U2AF2
GO:1901576	organic substance biosynthetic process	169	4656	1.26e-25	ENSP00000204517,ENSP00000216122,ENSP00000216297,ENSP00000216714,ENSP00000217182,ENSP00000224073,ENSP00000225792,ENSP00000228251,ENSP00000240185,ENSP00000246194,ENSP00000250916,ENSP00000253363,ENSP00000254719,ENSP00000254730,ENSP00000256383,ENSP00000257915,ENSP00000260129,ENSP00000261531,ENSP00000261600,ENSP00000262367,ENSP00000263274,ENSP00000265073,ENSP00000265433,ENSP00000268184,ENSP00000271555…	ACACB,ADRM1,AKT2,ALDOA,ALYREF,ANP32A,APEX1,ARRB2,ATP5J2,BAZ2A,BTK,CARM1,CBFB,CBX3,CDK1,CHAF1A,CHAF1B,CHD7,CHD9,CHEK1,CMPK1,CNBP,CPSF7,CREBBP,CRTC3,CSTF3,CXXC1,DDX1,DDX17,DDX21,DDX3X,DDX5,DEK,DKC1,DNAJC2,DNMT1,EDF1,EEF1A1,EEF1A2,EEF1B2,EEF1D,EEF1G,EEF2,EEFSEC,EIF2S1,EIF2S2,EIF4A1,ESRRA,ETF1,EWSR1,FLNA,GADD45GIP1,GNB2L1,GRB2,GTF2B,GTF2I,HDAC2,HELLS,HMGA1,HMGA2,HMGB2,HMGB3,HNRNPD,HNRNPDL,HNRNPU,HNRN…
GO:0000398	mRNA splicing, via spliceosome	43	284	1.78e-24	ENSP00000221419,ENSP00000225792,ENSP00000246194,ENSP00000254108,ENSP00000260129,ENSP00000261308,ENSP00000261531,ENSP00000265866,ENSP00000276079,ENSP00000283179,ENSP00000293677,ENSP00000307863,ENSP00000313199,ENSP00000315791,ENSP00000316042,ENSP00000326261,ENSP00000336741,ENSP00000341826,ENSP00000343966,ENSP00000345412,ENSP00000346694,ENSP00000349168,ENSP00000349748,ENSP00000352438,ENSP00000356541…	ALYREF,BCAS2,CELF1,CELF2,CPSF7,CSTF3,DDX1,DDX17,DDX39B,DDX5,DHX15,ELAVL1,FUS,HNRNPA0,HNRNPA1,HNRNPA2B1,HNRNPA3,HNRNPD,HNRNPH1,HNRNPH3,HNRNPL,HNRNPU,HNRNPUL1,KDM1A,NONO,PCBP2,PPWD1,PRPF4,PRPF8,PSIP1,PSPC1,RALY,RAVER1,RBMX,SF1,SF3B5,SFPQ,SMNDC1,SNW1,SRRM1,SYNCRIP,TGS1,U2AF2
GO:0010605	negative regulation of macromolecule metabolic process	119	2558	1.81e-24	ENSP00000204517,ENSP00000216714,ENSP00000221419,ENSP00000225792,ENSP00000228251,ENSP00000240185,ENSP00000250113,ENSP00000250916,ENSP00000256383,ENSP00000261531,ENSP00000261600,ENSP00000262367,ENSP00000262887,ENSP00000265433,ENSP00000276079,ENSP00000278572,ENSP00000283131,ENSP00000283179,ENSP00000283629,ENSP00000287239,ENSP00000292431,ENSP00000296503,ENSP00000296702,ENSP00000296930,ENSP00000300093…	ACACB,APEX1,ARRB2,AURKB,BAZ2A,CALM1,CBFB,CBX3,CELF1,CNBP,CREBBP,DDX17,DDX3X,DDX5,DDX6,DKC1,DNAJC2,DNMT1,EIF2S1,ELAVL1,ESRRA,ETF1,FLNA,FMR1,FXR2,GNB2L1,GNL3L,HDAC2,HELLS,HIST1H1C,HIST1H1E,HIST2H2AC,HMGA1,HMGA2,HMGB2,HNRNPA0,HNRNPA1,HNRNPA2B1,HNRNPD,HNRNPL,HNRNPU,ILF3,ING4,KAT6B,KDM1A,KLF16,LIG3,LYAR,MAFK,MORF4L2,MTF2,MYBBP1A,NACC1,NBN,NCL,NF1,NFIC,NONO,NPM1,NSD1,PA2G4,PARP1,PHF14,PHF6,PICALM,PKP3,…
GO:0009892	negative regulation of metabolic process	122	2762	2.64e-23	ENSP00000204517,ENSP00000216714,ENSP00000221419,ENSP00000225792,ENSP00000228251,ENSP00000240185,ENSP00000250113,ENSP00000250916,ENSP00000256383,ENSP00000261531,ENSP00000261600,ENSP00000262367,ENSP00000262887,ENSP00000265433,ENSP00000268184,ENSP00000276079,ENSP00000278572,ENSP00000283131,ENSP00000283179,ENSP00000283629,ENSP00000287239,ENSP00000292431,ENSP00000296503,ENSP00000296702,ENSP00000296930…	ACACB,APEX1,ARRB2,AURKB,BAZ2A,CALM1,CBFB,CBX3,CELF1,CNBP,CREBBP,CRTC3,DDX17,DDX3X,DDX5,DDX6,DKC1,DNAJC2,DNMT1,EIF2S1,ELAVL1,ESRRA,ETF1,FLNA,FMR1,FXR2,GNB2L1,GNL3L,HDAC2,HELLS,HIST1H1C,HIST1H1E,HIST2H2AC,HMGA1,HMGA2,HMGB2,HNRNPA0,HNRNPA1,HNRNPA2B1,HNRNPD,HNRNPL,HNRNPU,ILF3,ING4,KAT6B,KDM1A,KLF16,LARS,LIG3,LYAR,MAFK,MORF4L2,MTF2,MYBBP1A,NACC1,NBN,NCL,NF1,NFIC,NONO,NOSIP,NPM1,NSD1,PA2G4,PARP1,PHF14,…
GO:0045934	negative regulation of nucleobase-containing compound metabolic process	85	1424	6.33e-23	ENSP00000204517,ENSP00000216714,ENSP00000221419,ENSP00000225792,ENSP00000228251,ENSP00000240185,ENSP00000250916,ENSP00000261531,ENSP00000261600,ENSP00000262367,ENSP00000262887,ENSP00000265433,ENSP00000276079,ENSP00000278572,ENSP00000283131,ENSP00000283179,ENSP00000283629,ENSP00000287239,ENSP00000292431,ENSP00000296503,ENSP00000296702,ENSP00000300093,ENSP00000302886,ENSP00000307705,ENSP00000307863…	APEX1,AURKB,BAZ2A,CBFB,CBX3,CNBP,CREBBP,DDX5,DKC1,DNAJC2,DNMT1,ELAVL1,ESRRA,FLNA,FMR1,GNL3L,HDAC2,HELLS,HIST1H1C,HIST1H1E,HIST2H2AC,HMGA1,HMGA2,HMGB2,HNRNPA0,HNRNPA1,HNRNPA2B1,HNRNPD,HNRNPL,HNRNPU,ILF3,ING4,KAT6B,KDM1A,KLF16,LIG3,LYAR,MAFK,MORF4L2,MTF2,MYBBP1A,NACC1,NBN,NFIC,NONO,NSD1,PA2G4,PARP1,PHF14,PHF6,PKP3,PLK1,POU2F1,PPP1R13L,PSPC1,PURA,RBBP7,RBMX,RNF20,RPS13,RPS3,RREB1,RUVBL2,SF1,SFPQ,SLI…
GO:0010629	negative regulation of gene expression	92	1670	9.75e-23	ENSP00000204517,ENSP00000221419,ENSP00000225792,ENSP00000228251,ENSP00000240185,ENSP00000250113,ENSP00000250916,ENSP00000256383,ENSP00000261531,ENSP00000262367,ENSP00000276079,ENSP00000278572,ENSP00000283131,ENSP00000283179,ENSP00000283629,ENSP00000287239,ENSP00000292431,ENSP00000296503,ENSP00000296702,ENSP00000300093,ENSP00000302886,ENSP00000307705,ENSP00000307863,ENSP00000307889,ENSP00000313199…	ACACB,AURKB,BAZ2A,CBFB,CBX3,CELF1,CNBP,CREBBP,DDX17,DDX3X,DDX5,DDX6,DNMT1,EIF2S1,ESRRA,ETF1,FLNA,FMR1,FXR2,GNB2L1,HDAC2,HELLS,HIST1H1C,HIST1H1E,HIST2H2AC,HMGA1,HMGA2,HMGB2,HNRNPA2B1,HNRNPD,HNRNPL,HNRNPU,ILF3,ING4,KAT6B,KDM1A,KLF16,LYAR,MAFK,MORF4L2,MTF2,MYBBP1A,NACC1,NCL,NFIC,NONO,NSD1,PA2G4,PARP1,PHF14,PHF6,PICALM,PLK1,POU2F1,PPP1R13L,PSPC1,PURA,RBBP7,RBMX,RNASEH2B,RNF20,RPL13,RPL13A,RPL27,RPL7A…
GO:0034654	nucleobase-containing compound biosynthetic process	127	3031	1.64e-22	ENSP00000204517,ENSP00000216297,ENSP00000216714,ENSP00000224073,ENSP00000225792,ENSP00000228251,ENSP00000240185,ENSP00000246194,ENSP00000250916,ENSP00000253363,ENSP00000254719,ENSP00000257915,ENSP00000260129,ENSP00000261531,ENSP00000261600,ENSP00000262367,ENSP00000263274,ENSP00000265073,ENSP00000268184,ENSP00000271555,ENSP00000276079,ENSP00000278412,ENSP00000278572,ENSP00000283131,ENSP00000283179…	ACACB,ADRM1,ALDOA,ANP32A,APEX1,ARRB2,ATP5J2,BAZ2A,BTK,CARM1,CBFB,CBX3,CHAF1B,CHD7,CHD9,CMPK1,CNBP,CPSF7,CREBBP,CRTC3,CSTF3,CXXC1,DDX1,DDX17,DDX21,DDX3X,DDX5,DEK,DKC1,DNAJC2,DNMT1,EDF1,EEF1A1,EEF1D,ESRRA,EWSR1,FLNA,GTF2B,GTF2I,HDAC2,HELLS,HMGA1,HMGA2,HMGB2,HMGB3,HNRNPD,HNRNPDL,HNRNPU,HNRNPUL1,HOXC10,ILF3,IMPDH2,ING2,ING3,KAT6B,KDM1A,KLF16,LIG1,LIG3,LYAR,MAFK,MEF2D,MORF4L2,MYBBP1A,MYEF2,NACC1,NCOA3…
GO:0006259	DNA metabolic process	62	773	3.76e-22	ENSP00000216122,ENSP00000216297,ENSP00000216714,ENSP00000254719,ENSP00000261600,ENSP00000262887,ENSP00000263274,ENSP00000265433,ENSP00000276079,ENSP00000278412,ENSP00000278572,ENSP00000287437,ENSP00000296503,ENSP00000296930,ENSP00000301280,ENSP00000301764,ENSP00000302111,ENSP00000306565,ENSP00000311747,ENSP00000313851,ENSP00000315630,ENSP00000315700,ENSP00000318297,ENSP00000323421,ENSP00000323511…	ALKBH5,ALYREF,APEX1,BAZ2A,CDK1,CHAF1A,CHAF1B,CHD1L,CHEK1,DDB1,DDX1,DKC1,DNAJC2,DNMT1,HELLS,HMGA1,HMGA2,HMGB2,HMGB3,ING4,ISG20,LIG1,LIG3,MCM3,MCM5,MGMT,MORF4L2,MYBBP1A,NAP1L1,NBN,NFIC,NONO,NPM1,NSMCE2,PARP1,PDS5B,PNKP,POLD2,PURA,RAD54B,RBBP7,RBM14,RECQL,RPA1,RPS3,RUVBL1,RUVBL2,SFPQ,SMC1A,SMC3,SMC5,SSRP1,SUPT16H,SWAP70,THOC1,TOP1,TOP2A,TOP2B,UHRF1,UPF1,XRCC1,XRN2
GO:0071840	cellular component organization or biogenesis	175	5342	8.82e-22	ENSP00000070846,ENSP00000199320,ENSP00000204517,ENSP00000216181,ENSP00000216297,ENSP00000216639,ENSP00000216714,ENSP00000219150,ENSP00000220325,ENSP00000225298,ENSP00000230340,ENSP00000231004,ENSP00000240185,ENSP00000254719,ENSP00000254940,ENSP00000256383,ENSP00000260129,ENSP00000261531,ENSP00000262367,ENSP00000262887,ENSP00000265433,ENSP00000266679,ENSP00000268184,ENSP00000278572,ENSP00000280333…	ACACB,ADRM1,AHNAK,AKT2,ALDOA,APEX1,ARRB2,ATP5J2,AURKB,BANF1,BAZ2A,BYSL,CARM1,CBX3,CDC20,CDK1,CELF1,CELF2,CENPV,CHAF1A,CHAF1B,CHD1L,CHD7,CHD9,CHEK1,CORO1A,CPSF6,CPSF7,CREBBP,CRTC3,CXXC1,DDB1,DDX1,DDX17,DDX21,DDX39B,DDX3X,DDX52,DDX6,DEK,DIMT1,DKC1,DNAJC2,DNM2,DNMT1,DOCK1,EBNA1BP2,EHD4,EIF2S1,ELAVL1,ESRRA,ETF1,FAM103A1,FHL3,FLNA,G3BP1,GADD45GIP1,GNL3L,GRB2,GTF2B,HDAC2,HELLS,HIST1H1C,HIST1H1E,HIST1H2…
GO:0022613	ribonucleoprotein complex biogenesis	46	409	1.79e-21	ENSP00000199320,ENSP00000225298,ENSP00000230340,ENSP00000254940,ENSP00000256383,ENSP00000260129,ENSP00000261531,ENSP00000266679,ENSP00000296930,ENSP00000301364,ENSP00000302886,ENSP00000306565,ENSP00000307181,ENSP00000309126,ENSP00000318297,ENSP00000338573,ENSP00000339095,ENSP00000345412,ENSP00000345917,ENSP00000346067,ENSP00000346120,ENSP00000357555,ENSP00000358563,ENSP00000359645,ENSP00000361010…	BYSL,CELF1,CELF2,CHD7,CPSF6,CPSF7,DDX1,DDX17,DDX21,DDX39B,DDX3X,DDX52,DDX6,DIMT1,DKC1,EBNA1BP2,EIF2S1,FAM103A1,G3BP1,GNL3L,ISG20,LYAR,NIP7,NOP16,NPM1,NSUN5,PA2G4,PRPF8,PSIP1,RBMX,REXO4,RPL27,RPL7A,RPLP0,RPS18,RPS27,RPS7,RPSA,RUVBL1,RUVBL2,SF1,SNW1,TGS1,TSR1,UTP18,XRN2
GO:0045935	positive regulation of nucleobase-containing compound metabolic process	92	1770	4.34e-21	ENSP00000199320,ENSP00000204517,ENSP00000216297,ENSP00000216714,ENSP00000224073,ENSP00000225792,ENSP00000233078,ENSP00000240185,ENSP00000254108,ENSP00000257915,ENSP00000261531,ENSP00000261600,ENSP00000262367,ENSP00000262887,ENSP00000265073,ENSP00000265433,ENSP00000268184,ENSP00000271555,ENSP00000278572,ENSP00000283131,ENSP00000283179,ENSP00000287239,ENSP00000296503,ENSP00000296702,ENSP00000296930…	ALYREF,APEX1,ARRB2,AURKB,CARM1,CBFB,CDK1,CHD7,CHEK1,CNBP,CREBBP,CRTC3,CXXC1,DAZAP1,DDX17,DDX39B,DDX3X,DDX5,DIMT1,DKC1,DNAJC2,DNM2,DNMT1,EDF1,ESRRA,FAM58A,FUS,GTF2B,HDAC2,HMGA1,HMGA2,HMGB2,HNRNPA1,HNRNPA2B1,HNRNPD,HNRNPLL,HNRNPU,HOXC10,HTATIP2,ILF3,ING2,ING4,KAT6B,KDM1A,LMO7,MEF2D,MGMT,MORF4L2,MTF2,NBN,NCL,NCOA3,NFAT5,NFIC,NPM1,NSD1,PARP1,PHF8,PICALM,PNKP,POU2F1,PPP1R10,PSIP1,RAC1,RBM14,RBMX,RNF20…
GO:0006351	transcription, DNA-templated	113	2569	4.37e-21	ENSP00000204517,ENSP00000216297,ENSP00000216714,ENSP00000224073,ENSP00000225792,ENSP00000228251,ENSP00000240185,ENSP00000246194,ENSP00000250916,ENSP00000253363,ENSP00000257915,ENSP00000260129,ENSP00000261531,ENSP00000261600,ENSP00000262367,ENSP00000265073,ENSP00000268184,ENSP00000271555,ENSP00000276079,ENSP00000278412,ENSP00000278572,ENSP00000283131,ENSP00000283179,ENSP00000283629,ENSP00000287239…	ADRM1,ANP32A,APEX1,ARRB2,BAZ2A,BTK,CARM1,CBFB,CBX3,CHAF1B,CHD7,CHD9,CNBP,CPSF7,CREBBP,CRTC3,CSTF3,CXXC1,DDX1,DDX17,DDX21,DDX3X,DDX5,DEK,DNAJC2,DNMT1,EDF1,EEF1A1,EEF1D,ESRRA,EWSR1,FLNA,GTF2B,GTF2I,HDAC2,HELLS,HMGA1,HMGA2,HMGB2,HMGB3,HNRNPD,HNRNPDL,HNRNPU,HNRNPUL1,HOXC10,ILF3,ING2,ING3,KAT6B,KDM1A,KLF16,LYAR,MAFK,MEF2D,MORF4L2,MYBBP1A,MYEF2,NACC1,NCOA3,NFAT5,NFIC,NONO,NSD1,PA2G4,PARP1,PHF10,PHF6,PH…
GO:0051172	negative regulation of nitrogen compound metabolic process	105	2307	2.34e-20	ENSP00000204517,ENSP00000216714,ENSP00000221419,ENSP00000225792,ENSP00000228251,ENSP00000240185,ENSP00000250113,ENSP00000250916,ENSP00000256383,ENSP00000261531,ENSP00000261600,ENSP00000262367,ENSP00000262887,ENSP00000265433,ENSP00000276079,ENSP00000278572,ENSP00000283131,ENSP00000283179,ENSP00000283629,ENSP00000287239,ENSP00000292431,ENSP00000296503,ENSP00000296702,ENSP00000296930,ENSP00000300093…	APEX1,ARRB2,AURKB,BAZ2A,CALM1,CBFB,CBX3,CELF1,CNBP,CREBBP,DDX3X,DDX5,DKC1,DNAJC2,DNMT1,EIF2S1,ELAVL1,ESRRA,FLNA,FMR1,FXR2,GNB2L1,GNL3L,HDAC2,HELLS,HIST1H1C,HIST1H1E,HIST2H2AC,HMGA1,HMGA2,HMGB2,HNRNPA0,HNRNPA1,HNRNPA2B1,HNRNPD,HNRNPL,HNRNPU,ILF3,ING4,KAT6B,KDM1A,KLF16,LIG3,LYAR,MAFK,MORF4L2,MTF2,MYBBP1A,NACC1,NBN,NCL,NF1,NFIC,NONO,NPM1,NSD1,PA2G4,PARP1,PHF14,PHF6,PICALM,PKP3,PLK1,PNKP,POU2F1,PPP1R…
GO:0010628	positive regulation of gene expression	92	1826	3.16e-20	ENSP00000199320,ENSP00000204517,ENSP00000216181,ENSP00000216297,ENSP00000221419,ENSP00000224073,ENSP00000225792,ENSP00000228251,ENSP00000233078,ENSP00000240185,ENSP00000257915,ENSP00000261531,ENSP00000261600,ENSP00000262367,ENSP00000265073,ENSP00000268184,ENSP00000271555,ENSP00000278572,ENSP00000283131,ENSP00000283179,ENSP00000287239,ENSP00000296503,ENSP00000296930,ENSP00000307183,ENSP00000307321…	ALYREF,ARRB2,CARM1,CBFB,CDK1,CHD7,CHEK1,CNBP,CREBBP,CRTC3,CXXC1,DAZAP1,DDX17,DDX21,DDX39B,DDX3X,DDX5,DEK,DIMT1,DNAJC2,DNM2,DNMT1,EDF1,EEF2,ELAVL1,ESRRA,FAM58A,FAM98B,FMR1,GTF2B,HDAC2,HMGA1,HMGA2,HMGB2,HNRNPA0,HNRNPD,HNRNPL,HNRNPLL,HNRNPU,HOXC10,ILF3,ING2,KAT6B,KDM1A,LMNA,LMO7,MEF2D,MORF4L2,MTF2,MYBBP1A,MYH9,NCL,NCOA3,NFAT5,NFIC,NPM1,NSD1,PARP1,PHF8,PICALM,PKP3,POLR1E,POU2F1,PSIP1,RBM14,RBMX,RNF20…
GO:0006355	regulation of transcription, DNA-templated	135	3661	2.32e-19	ENSP00000204517,ENSP00000216297,ENSP00000216714,ENSP00000224073,ENSP00000225792,ENSP00000228251,ENSP00000240185,ENSP00000246194,ENSP00000250916,ENSP00000253363,ENSP00000254108,ENSP00000257915,ENSP00000260129,ENSP00000261531,ENSP00000261600,ENSP00000262367,ENSP00000265073,ENSP00000266732,ENSP00000268184,ENSP00000271555,ENSP00000276079,ENSP00000278412,ENSP00000278572,ENSP00000283131,ENSP00000283179…	ALYREF,ANP32A,APEX1,ARRB2,AURKB,BAZ2A,BTK,CARM1,CBFB,CBX3,CHAF1B,CHD7,CHD9,CHEK1,CNBP,CREBBP,CRTC3,CXXC1,DDX1,DDX17,DDX39B,DDX3X,DDX5,DEK,DNAJC2,DNM2,DNMT1,EDF1,EEF1A1,EEF1D,ESRRA,EWSR1,FAM58A,FAM83G,FLNA,FUS,GTF2B,GTF2I,HDAC2,HELLS,HIST1H1C,HIST1H1E,HIST2H2AC,HMGA1,HMGA2,HMGB2,HMGB3,HNRNPA2B1,HNRNPD,HNRNPDL,HNRNPU,HNRNPUL1,HOXC10,HP1BP3,HTATIP2,ILF3,ING2,ING3,ING4,KAT6B,KDM1A,KLF16,LMO7,LYAR,MAF…
GO:0031324	negative regulation of cellular metabolic process	107	2463	2.37e-19	ENSP00000204517,ENSP00000216714,ENSP00000221419,ENSP00000225792,ENSP00000228251,ENSP00000240185,ENSP00000250113,ENSP00000250916,ENSP00000256383,ENSP00000261531,ENSP00000261600,ENSP00000262367,ENSP00000262887,ENSP00000265433,ENSP00000276079,ENSP00000278572,ENSP00000283131,ENSP00000283179,ENSP00000283629,ENSP00000287239,ENSP00000292431,ENSP00000296503,ENSP00000296702,ENSP00000296930,ENSP00000300093…	ACACB,APEX1,ARRB2,AURKB,BAZ2A,CALM1,CBFB,CBX3,CELF1,CNBP,CREBBP,DDX3X,DDX5,DKC1,DNAJC2,DNMT1,EIF2S1,ELAVL1,ESRRA,FLNA,FMR1,FXR2,GNB2L1,GNL3L,HDAC2,HELLS,HIST1H1C,HIST1H1E,HIST2H2AC,HMGA1,HMGA2,HMGB2,HNRNPA0,HNRNPA1,HNRNPA2B1,HNRNPD,HNRNPL,HNRNPU,ILF3,ING4,KAT6B,KDM1A,KLF16,LARS,LIG3,LYAR,MAFK,MORF4L2,MTF2,MYBBP1A,NACC1,NBN,NCL,NF1,NFIC,NONO,NPM1,NSD1,PA2G4,PARP1,PHF14,PHF6,PICALM,PKP3,PLK1,PNKP,P…
GO:0010558	negative regulation of macromolecule biosynthetic process	79	1425	2.5e-19	ENSP00000204517,ENSP00000216714,ENSP00000225792,ENSP00000228251,ENSP00000250113,ENSP00000250916,ENSP00000256383,ENSP00000261531,ENSP00000262367,ENSP00000276079,ENSP00000278572,ENSP00000283131,ENSP00000283179,ENSP00000283629,ENSP00000287239,ENSP00000292431,ENSP00000296503,ENSP00000296702,ENSP00000300093,ENSP00000302886,ENSP00000307705,ENSP00000313199,ENSP00000313950,ENSP00000318195,ENSP00000323421…	APEX1,AURKB,BAZ2A,CBFB,CBX3,CELF1,CNBP,CREBBP,DDX3X,DDX5,DNAJC2,DNMT1,EIF2S1,ESRRA,FLNA,FMR1,FXR2,GNB2L1,GNL3L,HDAC2,HELLS,HIST1H1C,HIST1H1E,HIST2H2AC,HMGA1,HMGA2,HMGB2,HNRNPA1,HNRNPA2B1,HNRNPD,HNRNPU,ILF3,ING4,KAT6B,KDM1A,KLF16,LIG3,LYAR,MAFK,MORF4L2,MTF2,MYBBP1A,NACC1,NCL,NFIC,NONO,NSD1,PA2G4,PARP1,PHF14,PHF6,PLK1,POU2F1,PPP1R13L,PSPC1,PURA,RBBP7,RPL13A,RPS3,RREB1,RUVBL2,SF1,SFPQ,SMARCA5,SMC1A,…
GO:0051253	negative regulation of RNA metabolic process	75	1303	3.96e-19	ENSP00000204517,ENSP00000216714,ENSP00000221419,ENSP00000225792,ENSP00000228251,ENSP00000240185,ENSP00000250916,ENSP00000261531,ENSP00000262367,ENSP00000276079,ENSP00000283131,ENSP00000283179,ENSP00000283629,ENSP00000287239,ENSP00000292431,ENSP00000296503,ENSP00000296702,ENSP00000300093,ENSP00000302886,ENSP00000307705,ENSP00000307863,ENSP00000313199,ENSP00000313950,ENSP00000316042,ENSP00000329097…	APEX1,AURKB,BAZ2A,CBFB,CBX3,CNBP,CREBBP,DDX5,DKC1,DNMT1,ELAVL1,ESRRA,FLNA,FMR1,HDAC2,HELLS,HIST1H1C,HIST1H1E,HIST2H2AC,HMGA1,HMGA2,HMGB2,HNRNPA0,HNRNPA2B1,HNRNPD,HNRNPL,HNRNPU,ILF3,ING4,KAT6B,KDM1A,KLF16,LYAR,MAFK,MORF4L2,MTF2,MYBBP1A,NACC1,NFIC,NONO,NSD1,PA2G4,PARP1,PHF14,PHF6,PKP3,PLK1,POU2F1,PPP1R13L,PSPC1,PURA,RBBP7,RBMX,RNF20,RPS13,RREB1,RUVBL2,SF1,SFPQ,SLIRP,SMARCA5,SNW1,SYNCRIP,TAF3,TARDBP…
GO:0010604	positive regulation of macromolecule metabolic process	121	3081	5.81e-19	ENSP00000199320,ENSP00000204517,ENSP00000216181,ENSP00000216297,ENSP00000216714,ENSP00000220325,ENSP00000221419,ENSP00000224073,ENSP00000225792,ENSP00000228251,ENSP00000233078,ENSP00000240185,ENSP00000254108,ENSP00000257915,ENSP00000261531,ENSP00000261600,ENSP00000262367,ENSP00000262887,ENSP00000265073,ENSP00000265433,ENSP00000268184,ENSP00000271555,ENSP00000278572,ENSP00000283131,ENSP00000283179…	ADRM1,AKT2,ALYREF,APEX1,ARRB2,AURKB,CALM1,CARM1,CBFB,CDC20,CDK1,CHD7,CHEK1,CNBP,CREBBP,CRTC3,CXXC1,DAZAP1,DDB1,DDX17,DDX21,DDX39B,DDX3X,DDX5,DEK,DIMT1,DKC1,DNAJC2,DNM2,DNMT1,EDF1,EEF2,EHD4,ELAVL1,ESRRA,FAM58A,FAM98B,FMR1,FUS,GNB2L1,GTF2B,HDAC2,HMGA1,HMGA2,HMGB2,HNRNPA0,HNRNPA1,HNRNPA2B1,HNRNPD,HNRNPL,HNRNPLL,HNRNPU,HOXC10,HTATIP2,ILF3,ING2,ING4,KAT6B,KDM1A,LMNA,LMO7,MEF2D,MGMT,MORF4L2,MTF2,MYBBP1…
GO:2000113	negative regulation of cellular macromolecule biosynthetic process	76	1348	6.2e-19	ENSP00000204517,ENSP00000225792,ENSP00000228251,ENSP00000250113,ENSP00000250916,ENSP00000256383,ENSP00000261531,ENSP00000262367,ENSP00000276079,ENSP00000278572,ENSP00000283131,ENSP00000283179,ENSP00000283629,ENSP00000287239,ENSP00000292431,ENSP00000296503,ENSP00000296702,ENSP00000300093,ENSP00000302886,ENSP00000307705,ENSP00000313199,ENSP00000313950,ENSP00000318195,ENSP00000323421,ENSP00000329097…	AURKB,BAZ2A,CBFB,CBX3,CELF1,CNBP,CREBBP,DDX3X,DDX5,DNAJC2,DNMT1,EIF2S1,ESRRA,FLNA,FMR1,FXR2,GNB2L1,GNL3L,HDAC2,HELLS,HIST1H1C,HIST1H1E,HIST2H2AC,HMGA1,HMGA2,HMGB2,HNRNPA1,HNRNPA2B1,HNRNPD,HNRNPU,ILF3,ING4,KAT6B,KDM1A,KLF16,LIG3,LYAR,MAFK,MORF4L2,MTF2,MYBBP1A,NACC1,NCL,NFIC,NONO,NSD1,PA2G4,PARP1,PHF14,PHF6,PLK1,POU2F1,PPP1R13L,PSPC1,PURA,RBBP7,RPL13A,RPS3,RREB1,SFPQ,SMARCA5,SMC1A,SMC3,SNW1,SYNCRIP…
GO:0031327	negative regulation of cellular biosynthetic process	79	1479	1.95e-18	ENSP00000204517,ENSP00000216714,ENSP00000225792,ENSP00000228251,ENSP00000250113,ENSP00000250916,ENSP00000256383,ENSP00000261531,ENSP00000262367,ENSP00000276079,ENSP00000278572,ENSP00000283131,ENSP00000283179,ENSP00000283629,ENSP00000287239,ENSP00000292431,ENSP00000296503,ENSP00000296702,ENSP00000300093,ENSP00000302886,ENSP00000307705,ENSP00000313199,ENSP00000313950,ENSP00000318195,ENSP00000323421…	APEX1,AURKB,BAZ2A,CBFB,CBX3,CELF1,CNBP,CREBBP,DDX3X,DDX5,DNAJC2,DNMT1,EIF2S1,ESRRA,FLNA,FMR1,FXR2,GNB2L1,GNL3L,HDAC2,HELLS,HIST1H1C,HIST1H1E,HIST2H2AC,HMGA1,HMGA2,HMGB2,HNRNPA1,HNRNPA2B1,HNRNPD,HNRNPU,ILF3,ING4,KAT6B,KDM1A,KLF16,LIG3,LYAR,MAFK,MORF4L2,MTF2,MYBBP1A,NACC1,NCL,NFIC,NONO,NSD1,PA2G4,PARP1,PHF14,PHF6,PLK1,POU2F1,PPP1R13L,PSPC1,PURA,RBBP7,RPL13A,RPS3,RREB1,RUVBL2,SF1,SFPQ,SMARCA5,SMC1A,…
GO:0006325	chromatin organization	53	683	3.19e-18	ENSP00000216297,ENSP00000216639,ENSP00000262367,ENSP00000283131,ENSP00000283179,ENSP00000287239,ENSP00000296503,ENSP00000296930,ENSP00000299736,ENSP00000301280,ENSP00000301764,ENSP00000307183,ENSP00000307705,ENSP00000311747,ENSP00000312625,ENSP00000313950,ENSP00000315700,ENSP00000318297,ENSP00000320566,ENSP00000325690,ENSP00000332194,ENSP00000336687,ENSP00000339566,ENSP00000348924,ENSP00000349748…	AURKB,BAZ2A,CARM1,CBX3,CDK1,CENPV,CHAF1A,CHAF1B,CHD1L,CHD7,CHD9,CHEK1,CREBBP,CXXC1,DDB1,DEK,DNAJC2,DNMT1,HDAC2,HELLS,HIST1H1C,HIST1H1E,HIST1H2BF,HIST2H2AC,HMGA1,HMGA2,HMGB2,HNRNPU,HP1BP3,ING2,ING3,ING4,KAT6B,KDM1A,MORF4L2,MTF2,NAP1L1,NCOA3,NPM1,NSD1,PHF8,RBBP7,RBM14,RNF20,RUVBL1,RUVBL2,SAFB,SFPQ,SMARCA5,SUPT16H,TOP1,UHRF1,VRK1
GO:0009893	positive regulation of metabolic process	124	3280	3.19e-18	ENSP00000199320,ENSP00000204517,ENSP00000216181,ENSP00000216297,ENSP00000216714,ENSP00000217182,ENSP00000220325,ENSP00000221419,ENSP00000224073,ENSP00000225792,ENSP00000228251,ENSP00000233078,ENSP00000240185,ENSP00000254108,ENSP00000257915,ENSP00000261531,ENSP00000261600,ENSP00000262367,ENSP00000262887,ENSP00000265073,ENSP00000265433,ENSP00000268184,ENSP00000271555,ENSP00000278572,ENSP00000283131…	ACACB,ADRM1,AKT2,ALYREF,APEX1,ARRB2,AURKB,CALM1,CARM1,CBFB,CDC20,CDK1,CHD7,CHEK1,CNBP,CREBBP,CRTC3,CXXC1,DAZAP1,DDB1,DDX17,DDX21,DDX39B,DDX3X,DDX5,DEK,DIMT1,DKC1,DNAJC2,DNM2,DNMT1,EDF1,EEF1A2,EEF2,EHD4,ELAVL1,ESRRA,FAM58A,FAM98B,FMR1,FUS,GNB2L1,GRB2,GTF2B,HDAC2,HMGA1,HMGA2,HMGB2,HNRNPA0,HNRNPA1,HNRNPA2B1,HNRNPD,HNRNPL,HNRNPLL,HNRNPU,HOXC10,HTATIP2,ILF3,ING2,ING4,KAT6B,KDM1A,LMNA,LMO7,MEF2D,MGMT,M…
GO:0010557	positive regulation of macromolecule biosynthetic process	86	1758	5.42e-18	ENSP00000204517,ENSP00000216297,ENSP00000216714,ENSP00000221419,ENSP00000224073,ENSP00000228251,ENSP00000240185,ENSP00000254108,ENSP00000257915,ENSP00000261531,ENSP00000261600,ENSP00000262367,ENSP00000265073,ENSP00000268184,ENSP00000271555,ENSP00000283131,ENSP00000283179,ENSP00000287239,ENSP00000296503,ENSP00000296702,ENSP00000296930,ENSP00000307183,ENSP00000307321,ENSP00000307940,ENSP00000311747…	AKT2,ALYREF,APEX1,ARRB2,AURKB,CARM1,CBFB,CDK1,CHD7,CHEK1,CNBP,CREBBP,CRTC3,CXXC1,DDX17,DDX39B,DDX3X,DKC1,DNAJC2,DNM2,EDF1,EEF2,ELAVL1,ESRRA,FAM58A,FMR1,FUS,GTF2B,HDAC2,HMGA1,HMGA2,HMGB2,HNRNPA1,HNRNPA2B1,HNRNPD,HNRNPL,HNRNPU,HOXC10,HTATIP2,ILF3,ING2,ING4,KAT6B,KDM1A,LMO7,MEF2D,MORF4L2,MTF2,NCL,NCOA3,NFAT5,NFIC,NPM1,NSD1,PARP1,PHF8,PICALM,PNKP,POU2F1,PSIP1,RAC1,RBM14,RBMX,RNF20,RPRD1B,RREB1,RUVBL1…
GO:0044085	cellular component biogenesis	106	2556	9.64e-18	ENSP00000070846,ENSP00000199320,ENSP00000204517,ENSP00000219150,ENSP00000220325,ENSP00000225298,ENSP00000230340,ENSP00000231004,ENSP00000254719,ENSP00000254940,ENSP00000256383,ENSP00000260129,ENSP00000261531,ENSP00000262367,ENSP00000265433,ENSP00000266679,ENSP00000268184,ENSP00000278572,ENSP00000283131,ENSP00000287239,ENSP00000292431,ENSP00000296503,ENSP00000296930,ENSP00000299736,ENSP00000300093…	ACACB,ADRM1,AHNAK,ALDOA,AURKB,BAZ2A,BYSL,CDC20,CDK1,CELF1,CELF2,CENPV,CHAF1A,CHAF1B,CHD1L,CHD7,CORO1A,CPSF6,CPSF7,CREBBP,CRTC3,DDB1,DDX1,DDX17,DDX21,DDX39B,DDX3X,DDX52,DDX6,DIMT1,DKC1,DNM2,EBNA1BP2,EHD4,EIF2S1,ELAVL1,FAM103A1,FLNA,G3BP1,GNL3L,GRB2,GTF2B,HELLS,HIST1H1C,HIST1H1E,HIST1H2BF,HMGA1,HMGA2,HMGB2,HP1BP3,IMPDH2,ISG20,KAT6B,LOX,LYAR,MYH10,NACC1,NAP1L1,NBN,NIP7,NOP16,NPM1,NSUN5,OAS1,PA2G4,PA…
GO:0048519	negative regulation of biological process	158	4953	1.27e-17	ENSP00000070846,ENSP00000204517,ENSP00000216181,ENSP00000216714,ENSP00000219150,ENSP00000221419,ENSP00000225792,ENSP00000228251,ENSP00000240185,ENSP00000250113,ENSP00000250916,ENSP00000256383,ENSP00000261531,ENSP00000261600,ENSP00000262367,ENSP00000262887,ENSP00000265433,ENSP00000268184,ENSP00000269321,ENSP00000276079,ENSP00000278572,ENSP00000283131,ENSP00000283179,ENSP00000283629,ENSP00000287239…	ACACB,AKT2,APEX1,API5,ARHGDIA,ARRB2,AURKB,BANF1,BAZ2A,BTK,CALM1,CARM1,CBFB,CBX3,CDK1,CELF1,CHEK1,CNBP,CORO1A,CREBBP,CRTC3,DDB1,DDX17,DDX39B,DDX3X,DDX5,DDX6,DKC1,DNAJC2,DNM2,DNMT1,EIF2S1,ELAVL1,ESRRA,ETF1,FLNA,FMR1,FXR2,G3BP1,GADD45GIP1,GNB2L1,GNL3L,GRB2,GTF2I,HDAC2,HELLS,HIST1H1C,HIST1H1E,HIST2H2AC,HMGA1,HMGA2,HMGB2,HNRNPA0,HNRNPA1,HNRNPA2B1,HNRNPD,HNRNPL,HNRNPU,HTATIP2,ILF3,ING2,ING4,ISG20,KAT6B…
GO:0031328	positive regulation of cellular biosynthetic process	87	1846	2.91e-17	ENSP00000204517,ENSP00000216297,ENSP00000216714,ENSP00000221419,ENSP00000224073,ENSP00000228251,ENSP00000240185,ENSP00000254108,ENSP00000257915,ENSP00000261531,ENSP00000261600,ENSP00000262367,ENSP00000265073,ENSP00000268184,ENSP00000271555,ENSP00000283131,ENSP00000283179,ENSP00000287239,ENSP00000296503,ENSP00000296702,ENSP00000296930,ENSP00000307183,ENSP00000307321,ENSP00000307940,ENSP00000311747…	AKT2,ALYREF,APEX1,ARRB2,AURKB,CARM1,CBFB,CDK1,CHD7,CHEK1,CNBP,CREBBP,CRTC3,CXXC1,DDX17,DDX39B,DDX3X,DKC1,DNAJC2,DNM2,EDF1,EEF2,ELAVL1,ESRRA,FAM58A,FMR1,FUS,GNB2L1,GTF2B,HDAC2,HMGA1,HMGA2,HMGB2,HNRNPA1,HNRNPA2B1,HNRNPD,HNRNPL,HNRNPU,HOXC10,HTATIP2,ILF3,ING2,ING4,KAT6B,KDM1A,LMO7,MEF2D,MORF4L2,MTF2,NCL,NCOA3,NFAT5,NFIC,NPM1,NSD1,PARP1,PHF8,PICALM,PNKP,POU2F1,PSIP1,RAC1,RBM14,RBMX,RNF20,RPRD1B,RREB1…
GO:0071103	DNA conformation change	33	257	7.93e-17	ENSP00000265433,ENSP00000283131,ENSP00000287239,ENSP00000296503,ENSP00000296930,ENSP00000299736,ENSP00000301280,ENSP00000307705,ENSP00000312625,ENSP00000315700,ENSP00000318297,ENSP00000332706,ENSP00000336606,ENSP00000339566,ENSP00000346694,ENSP00000348924,ENSP00000349961,ENSP00000354522,ENSP00000358262,ENSP00000359393,ENSP00000369424,ENSP00000370745,ENSP00000377601,ENSP00000377681,ENSP00000378699…	CDK1,CENPV,CHAF1A,CHAF1B,CHD1L,DDX1,DDX3X,G3BP1,HELLS,HIST1H1C,HIST1H1E,HIST1H2BF,HMGA1,HMGA2,HMGB2,HMGB3,HNRNPA2B1,HP1BP3,KAT6B,NAP1L1,NBN,NPM1,PURA,RAD54B,RBBP7,RECQL,RUVBL1,RUVBL2,SMARCA5,SMC4,TOP1,TOP2A,TOP2B
GO:0051254	positive regulation of RNA metabolic process	78	1596	4.45e-16	ENSP00000199320,ENSP00000204517,ENSP00000216297,ENSP00000216714,ENSP00000224073,ENSP00000225792,ENSP00000233078,ENSP00000240185,ENSP00000254108,ENSP00000257915,ENSP00000261531,ENSP00000261600,ENSP00000262367,ENSP00000265073,ENSP00000268184,ENSP00000271555,ENSP00000283131,ENSP00000283179,ENSP00000287239,ENSP00000296503,ENSP00000296702,ENSP00000296930,ENSP00000307183,ENSP00000307321,ENSP00000307863…	ALYREF,APEX1,CARM1,CBFB,CHD7,CHEK1,CNBP,CREBBP,CRTC3,CXXC1,DAZAP1,DDX17,DDX39B,DDX3X,DDX5,DIMT1,DNAJC2,DNM2,EDF1,ESRRA,FAM58A,FUS,GTF2B,HDAC2,HMGA1,HMGA2,HMGB2,HNRNPD,HNRNPLL,HNRNPU,HOXC10,HTATIP2,ILF3,ING2,ING4,KAT6B,KDM1A,LMO7,MEF2D,MORF4L2,MTF2,NCL,NCOA3,NFAT5,NFIC,NPM1,NSD1,PARP1,PHF8,PICALM,POU2F1,PSIP1,RBM14,RBMX,RNF20,RPRD1B,RREB1,RUVBL1,RUVBL2,SAFB,SFPQ,SMARCA5,SNW1,SUB1,SUPT16H,TARDBP,TC…
GO:0048518	positive regulation of biological process	164	5459	5.54e-16	ENSP00000070846,ENSP00000199320,ENSP00000204517,ENSP00000216181,ENSP00000216297,ENSP00000216714,ENSP00000217182,ENSP00000219150,ENSP00000220325,ENSP00000221419,ENSP00000224073,ENSP00000225792,ENSP00000228251,ENSP00000233078,ENSP00000240185,ENSP00000254108,ENSP00000254719,ENSP00000256383,ENSP00000257915,ENSP00000261531,ENSP00000261600,ENSP00000262367,ENSP00000262887,ENSP00000265073,ENSP00000265433…	ACACB,ADRM1,AKT2,ALYREF,APEX1,ARHGDIA,ARRB2,AURKB,BTK,CALM1,CARM1,CBFB,CDC20,CDK1,CENPV,CHD1L,CHD7,CHEK1,CNBP,CORO1A,CPSF6,CREBBP,CRTC3,CXXC1,DAZAP1,DDB1,DDX17,DDX21,DDX39B,DDX3X,DDX5,DEK,DIMT1,DKC1,DNAJC2,DNM2,DNMT1,DOCK1,EDF1,EEF1A2,EEF2,EHD4,EIF2S1,ELAVL1,ESRRA,FAM58A,FAM98B,FLNA,FMR1,FUS,GNB2L1,GNL3L,GRB2,GTF2B,HDAC2,HMGA1,HMGA2,HMGB2,HNRNPA0,HNRNPA1,HNRNPA2B1,HNRNPD,HNRNPL,HNRNPLL,HNRNPU,HOX…
GO:0010608	posttranscriptional regulation of gene expression	40	441	1.13e-15	ENSP00000216714,ENSP00000221419,ENSP00000228251,ENSP00000240185,ENSP00000250113,ENSP00000254730,ENSP00000256383,ENSP00000278572,ENSP00000283179,ENSP00000296411,ENSP00000296930,ENSP00000302886,ENSP00000307940,ENSP00000313199,ENSP00000316042,ENSP00000318195,ENSP00000326031,ENSP00000332706,ENSP00000333667,ENSP00000337632,ENSP00000346694,ENSP00000353741,ENSP00000356448,ENSP00000358563,ENSP00000358635…	AKT2,ANP32A,APEX1,CELF1,DDX1,DDX39B,DDX3X,DDX6,DKC1,EEF2,EEFSEC,EIF2S1,ELAVL1,ETF1,FMR1,FXR2,GNB2L1,HNRNPA0,HNRNPA2B1,HNRNPD,HNRNPL,HNRNPU,ILF3,METAP1,NCL,NPM1,PA2G4,PPP1CA,PURA,RPL13A,RPS3,SARNP,SERBP1,SHMT2,SYNCRIP,TARDBP,TPR,UPF1,YBX3,YWHAB
GO:0006996	organelle organization	115	3131	1.17e-15	ENSP00000070846,ENSP00000216181,ENSP00000216297,ENSP00000216639,ENSP00000216714,ENSP00000219150,ENSP00000240185,ENSP00000254719,ENSP00000254940,ENSP00000256383,ENSP00000262367,ENSP00000262887,ENSP00000265433,ENSP00000278572,ENSP00000280333,ENSP00000283131,ENSP00000283179,ENSP00000287239,ENSP00000287437,ENSP00000292475,ENSP00000296503,ENSP00000296930,ENSP00000299736,ENSP00000300093,ENSP00000301280…	ALDOA,APEX1,ATP5J2,AURKB,BANF1,BAZ2A,CARM1,CBX3,CDC20,CDK1,CENPV,CHAF1A,CHAF1B,CHD1L,CHD7,CHD9,CHEK1,CORO1A,CREBBP,CXXC1,DDB1,DDX1,DDX3X,DDX6,DEK,DKC1,DNAJC2,DNM2,DNMT1,DOCK1,EIF2S1,ESRRA,FHL3,FLNA,G3BP1,HDAC2,HELLS,HIST1H1C,HIST1H1E,HIST1H2BF,HIST2H2AC,HMGA1,HMGA2,HMGB2,HMGB3,HNRNPA2B1,HNRNPU,HP1BP3,ING2,ING3,ING4,KAT6B,KDM1A,KIF2C,LIG3,LMNA,MORF4L2,MTF2,MYH10,MYH9,NAP1L1,NBN,NCOA3,NF1,NIP7,NPM1…
GO:0033044	regulation of chromosome organization	34	313	2.33e-15	ENSP00000261531,ENSP00000262887,ENSP00000265433,ENSP00000283179,ENSP00000287437,ENSP00000299736,ENSP00000300093,ENSP00000307183,ENSP00000313199,ENSP00000313950,ENSP00000323511,ENSP00000338573,ENSP00000341826,ENSP00000346694,ENSP00000349748,ENSP00000350676,ENSP00000352516,ENSP00000354957,ENSP00000355759,ENSP00000356448,ENSP00000357283,ENSP00000358563,ENSP00000359321,ENSP00000359506,ENSP00000365694…	AURKB,CENPV,CHEK1,DKC1,DNMT1,FMR1,GNL3L,HMGA1,HNRNPA1,HNRNPA2B1,HNRNPD,HNRNPU,ING2,KDM1A,LMNA,MTF2,NBN,NSD1,NSMCE2,PARP1,PHF8,PLK1,PNKP,PPP1R10,RNF20,RUVBL2,SFPQ,SMC5,SNW1,TOP2A,TPR,UHRF1,UPF1,XRCC1
GO:0006974	cellular response to DNA damage stimulus	51	749	2.5e-15	ENSP00000204517,ENSP00000216297,ENSP00000216714,ENSP00000254719,ENSP00000261531,ENSP00000262887,ENSP00000263274,ENSP00000265433,ENSP00000276079,ENSP00000278412,ENSP00000278572,ENSP00000287437,ENSP00000296503,ENSP00000296930,ENSP00000300093,ENSP00000301280,ENSP00000301764,ENSP00000302111,ENSP00000311747,ENSP00000313851,ENSP00000315700,ENSP00000318297,ENSP00000323421,ENSP00000323511,ENSP00000325690…	ALKBH5,APEX1,C4orf27,CARM1,CDK1,CHAF1A,CHAF1B,CHD1L,CHEK1,DDB1,DDX1,FMR1,GRB2,HMGA1,HMGA2,HMGB2,ING4,LIG1,LIG3,MGMT,MORF4L2,NBN,NONO,NPM1,NSMCE2,PARP1,PDS5B,PLK1,PNKP,POLD2,PTPN11,RAD54B,RBM14,RECQL,RPA1,RPS3,RUVBL1,RUVBL2,SFPQ,SMC1A,SMC3,SMC5,SNW1,SSRP1,SUPT16H,TFAP4,TOP2A,UBA1,UHRF1,UPF1,XRCC1
GO:0051173	positive regulation of nitrogen compound metabolic process	110	2946	2.58e-15	ENSP00000199320,ENSP00000204517,ENSP00000216181,ENSP00000216297,ENSP00000216714,ENSP00000220325,ENSP00000221419,ENSP00000224073,ENSP00000225792,ENSP00000228251,ENSP00000233078,ENSP00000240185,ENSP00000254108,ENSP00000257915,ENSP00000261531,ENSP00000261600,ENSP00000262367,ENSP00000262887,ENSP00000265073,ENSP00000265433,ENSP00000268184,ENSP00000271555,ENSP00000278572,ENSP00000283131,ENSP00000283179…	ADRM1,AKT2,ALYREF,APEX1,ARRB2,AURKB,CALM1,CARM1,CBFB,CDC20,CDK1,CHD7,CHEK1,CNBP,CREBBP,CRTC3,CXXC1,DAZAP1,DDB1,DDX17,DDX39B,DDX3X,DDX5,DIMT1,DKC1,DNAJC2,DNM2,DNMT1,EDF1,EEF2,EHD4,ELAVL1,ESRRA,FAM58A,FMR1,FUS,GNB2L1,GTF2B,HDAC2,HMGA1,HMGA2,HMGB2,HNRNPA1,HNRNPA2B1,HNRNPD,HNRNPL,HNRNPLL,HNRNPU,HOXC10,HTATIP2,ILF3,ING2,ING4,KAT6B,KDM1A,LMO7,MEF2D,MGMT,MORF4L2,MTF2,MYH9,NBN,NCL,NCOA3,NFAT5,NFIC,NPM1,N…
GO:0031325	positive regulation of cellular metabolic process	112	3060	4.74e-15	ENSP00000199320,ENSP00000204517,ENSP00000216181,ENSP00000216297,ENSP00000216714,ENSP00000217182,ENSP00000220325,ENSP00000221419,ENSP00000224073,ENSP00000225792,ENSP00000228251,ENSP00000233078,ENSP00000240185,ENSP00000254108,ENSP00000257915,ENSP00000261531,ENSP00000261600,ENSP00000262367,ENSP00000262887,ENSP00000265073,ENSP00000265433,ENSP00000268184,ENSP00000271555,ENSP00000278572,ENSP00000283131…	ACACB,ADRM1,AKT2,ALYREF,APEX1,ARRB2,AURKB,CALM1,CARM1,CBFB,CDC20,CDK1,CHD7,CHEK1,CNBP,CREBBP,CRTC3,CXXC1,DAZAP1,DDX17,DDX39B,DDX3X,DDX5,DIMT1,DKC1,DNAJC2,DNM2,DNMT1,EDF1,EEF1A2,EEF2,EHD4,ELAVL1,ESRRA,FAM58A,FMR1,FUS,GNB2L1,GRB2,GTF2B,HDAC2,HMGA1,HMGA2,HMGB2,HNRNPA1,HNRNPA2B1,HNRNPD,HNRNPL,HNRNPLL,HNRNPU,HOXC10,HTATIP2,ILF3,ING2,ING4,KAT6B,KDM1A,LMO7,MEF2D,MGMT,MORF4L2,MTF2,MYH9,NBN,NCL,NCOA3,NFAT…
GO:0009987	cellular process	300	14652	9.86e-15	ENSP00000070846,ENSP00000199320,ENSP00000204517,ENSP00000216038,ENSP00000216122,ENSP00000216181,ENSP00000216297,ENSP00000216639,ENSP00000216714,ENSP00000217182,ENSP00000219150,ENSP00000220325,ENSP00000221419,ENSP00000224073,ENSP00000225298,ENSP00000225792,ENSP00000228251,ENSP00000229329,ENSP00000230340,ENSP00000231004,ENSP00000233078,ENSP00000240185,ENSP00000246194,ENSP00000250916,ENSP00000253363…	ACACB,ADRM1,AHNAK,AKT2,ALDOA,ALKBH5,ALYREF,ANP32A,APEX1,API5,ARHGDIA,ARRB2,ATP5J2,AURKB,BANF1,BAZ2A,BCAS2,BTK,BYSL,C4orf27,CALM1,CARM1,CBFB,CBX3,CDC20,CDK1,CELF1,CELF2,CENPV,CHAF1A,CHAF1B,CHD1L,CHD7,CHD9,CHEK1,CMAS,CMPK1,CNBP,CORO1A,CPSF6,CPSF7,CREBBP,CRTC3,CS,CSRP2,CSTF3,CXXC1,DAZAP1,DDB1,DDX1,DDX17,DDX21,DDX39B,DDX3X,DDX5,DDX52,DDX6,DEK,DHX15,DIMT1,DKC1,DNAJB11,DNAJC2,DNM2,DNMT1,DOCK1,EBNA1BP2,…
GO:0033554	cellular response to stress	74	1553	1.29e-14	ENSP00000204517,ENSP00000216297,ENSP00000216714,ENSP00000221419,ENSP00000228251,ENSP00000240185,ENSP00000254719,ENSP00000256383,ENSP00000261531,ENSP00000262367,ENSP00000262887,ENSP00000263274,ENSP00000265433,ENSP00000276079,ENSP00000278412,ENSP00000278572,ENSP00000287437,ENSP00000296503,ENSP00000296930,ENSP00000300093,ENSP00000301280,ENSP00000301764,ENSP00000302111,ENSP00000307940,ENSP00000311747…	ALKBH5,APEX1,BTK,C4orf27,CARM1,CDK1,CHAF1A,CHAF1B,CHD1L,CHEK1,CREBBP,CXXC1,DDB1,DDX1,DDX3X,DNAJB11,DNM2,EEF2,EIF2S1,FMR1,GRB2,HDAC2,HMGA1,HMGA2,HMGB2,HNRNPA1,HNRNPD,HNRNPL,HP1BP3,ING4,LARS,LIG1,LIG3,LMNA,MGMT,MORF4L2,MYBBP1A,NBN,NF1,NONO,NPM1,NSMCE2,PARP1,PDS5B,PLK1,PNKP,POLD2,PPP1CA,PTPN11,RAD54B,RBBP7,RBM14,RECQL,RPA1,RPS3,RUVBL1,RUVBL2,SFPQ,SMC1A,SMC3,SMC5,SNW1,SSRP1,STK24,SUPT16H,TARDBP,TFAP4…
GO:0048523	negative regulation of cellular process	140	4454	2.62e-14	ENSP00000070846,ENSP00000204517,ENSP00000216181,ENSP00000216714,ENSP00000219150,ENSP00000221419,ENSP00000225792,ENSP00000228251,ENSP00000240185,ENSP00000250113,ENSP00000250916,ENSP00000256383,ENSP00000261531,ENSP00000261600,ENSP00000262367,ENSP00000262887,ENSP00000265433,ENSP00000268184,ENSP00000269321,ENSP00000276079,ENSP00000278572,ENSP00000283131,ENSP00000283179,ENSP00000283629,ENSP00000287239…	ACACB,AKT2,APEX1,API5,ARHGDIA,ARRB2,AURKB,BAZ2A,BTK,CALM1,CARM1,CBFB,CBX3,CDK1,CELF1,CHEK1,CNBP,CORO1A,CREBBP,CRTC3,DDB1,DDX39B,DDX3X,DDX5,DDX6,DKC1,DNAJC2,DNM2,DNMT1,EIF2S1,ELAVL1,ESRRA,FLNA,FMR1,FXR2,G3BP1,GADD45GIP1,GNB2L1,GNL3L,GRB2,HDAC2,HELLS,HIST1H1C,HIST1H1E,HIST2H2AC,HMGA1,HMGA2,HMGB2,HNRNPA0,HNRNPA1,HNRNPA2B1,HNRNPD,HNRNPL,HNRNPU,HTATIP2,ILF3,ING2,ING4,KAT6B,KDM1A,KLF16,LARS,LIG3,LMNA,L…
GO:0016043	cellular component organization	154	5163	2.76e-14	ENSP00000070846,ENSP00000204517,ENSP00000216181,ENSP00000216297,ENSP00000216639,ENSP00000216714,ENSP00000219150,ENSP00000220325,ENSP00000231004,ENSP00000240185,ENSP00000254719,ENSP00000254940,ENSP00000256383,ENSP00000260129,ENSP00000261531,ENSP00000262367,ENSP00000262887,ENSP00000265433,ENSP00000266679,ENSP00000268184,ENSP00000278572,ENSP00000280333,ENSP00000283131,ENSP00000283179,ENSP00000287239…	ACACB,ADRM1,AHNAK,AKT2,ALDOA,APEX1,ARRB2,ATP5J2,AURKB,BANF1,BAZ2A,CARM1,CBX3,CDC20,CDK1,CELF1,CELF2,CENPV,CHAF1A,CHAF1B,CHD1L,CHD7,CHD9,CHEK1,CORO1A,CPSF6,CPSF7,CREBBP,CRTC3,CXXC1,DDB1,DDX1,DDX39B,DDX3X,DDX6,DEK,DKC1,DNAJC2,DNM2,DNMT1,DOCK1,EHD4,EIF2S1,ELAVL1,ESRRA,ETF1,FAM103A1,FHL3,FLNA,G3BP1,GADD45GIP1,GRB2,GTF2B,HDAC2,HELLS,HIST1H1C,HIST1H1E,HIST1H2BF,HIST2H2AC,HMGA1,HMGA2,HMGB2,HMGB3,HNRNPA2…
GO:0006281	DNA repair	40	491	3.02e-14	ENSP00000216297,ENSP00000216714,ENSP00000254719,ENSP00000262887,ENSP00000263274,ENSP00000265433,ENSP00000276079,ENSP00000278412,ENSP00000278572,ENSP00000287437,ENSP00000296503,ENSP00000296930,ENSP00000301280,ENSP00000301764,ENSP00000302111,ENSP00000311747,ENSP00000313851,ENSP00000315700,ENSP00000318297,ENSP00000323421,ENSP00000323511,ENSP00000336606,ENSP00000349748,ENSP00000354720,ENSP00000354957…	ALKBH5,APEX1,CDK1,CHAF1A,CHAF1B,CHD1L,CHEK1,DDB1,DDX1,HMGA1,HMGA2,HMGB2,LIG1,LIG3,MGMT,MORF4L2,NBN,NONO,NPM1,NSMCE2,PARP1,PDS5B,PNKP,POLD2,RAD54B,RBM14,RECQL,RPA1,RPS3,RUVBL1,RUVBL2,SFPQ,SMC1A,SMC3,SMC5,SSRP1,SUPT16H,UHRF1,UPF1,XRCC1
GO:1903311	regulation of mRNA metabolic process	29	238	3.1e-14	ENSP00000216714,ENSP00000221419,ENSP00000225792,ENSP00000228251,ENSP00000233078,ENSP00000240185,ENSP00000261531,ENSP00000266679,ENSP00000283179,ENSP00000296930,ENSP00000307863,ENSP00000313199,ENSP00000316042,ENSP00000331678,ENSP00000341826,ENSP00000345412,ENSP00000346694,ENSP00000358635,ENSP00000359506,ENSP00000359645,ENSP00000360034,ENSP00000361930,ENSP00000364639,ENSP00000373772,ENSP00000380033…	ANP32A,APEX1,CPSF6,CPSF7,DAZAP1,DDX17,DDX5,ELAVL1,FMR1,HNRNPA0,HNRNPA1,HNRNPA2B1,HNRNPD,HNRNPL,HNRNPU,NPM1,PKP3,RBM7,RBMX,RNF20,SAFB,SERBP1,SNW1,SYNCRIP,TARDBP,U2AF2,UPF1,YBX3,YWHAB
GO:0006260	DNA replication	27	203	4.55e-14	ENSP00000216122,ENSP00000216297,ENSP00000254719,ENSP00000261600,ENSP00000263274,ENSP00000265433,ENSP00000278412,ENSP00000301280,ENSP00000311747,ENSP00000315700,ENSP00000323511,ENSP00000332706,ENSP00000354522,ENSP00000355759,ENSP00000367787,ENSP00000368565,ENSP00000369424,ENSP00000378699,ENSP00000380024,ENSP00000388648,ENSP00000396843,ENSP00000399888,ENSP00000421592,ENSP00000470142,ENSP00000477538…	ALYREF,CDK1,CHAF1A,CHAF1B,CHEK1,DNAJC2,HMGA1,ING4,LIG1,LIG3,MCM3,MCM5,NAP1L1,NBN,NFIC,PARP1,PNKP,POLD2,PURA,RBBP7,RBM14,RPA1,SSRP1,SUPT16H,THOC1,TOP1,UPF1
GO:1903508	positive regulation of nucleic acid-templated transcription	72	1520	4.55e-14	ENSP00000204517,ENSP00000216297,ENSP00000216714,ENSP00000224073,ENSP00000240185,ENSP00000254108,ENSP00000257915,ENSP00000261531,ENSP00000261600,ENSP00000262367,ENSP00000265073,ENSP00000268184,ENSP00000271555,ENSP00000283131,ENSP00000283179,ENSP00000287239,ENSP00000296503,ENSP00000296702,ENSP00000296930,ENSP00000307183,ENSP00000307321,ENSP00000311747,ENSP00000313199,ENSP00000314129,ENSP00000318195…	ALYREF,APEX1,CARM1,CBFB,CHD7,CHEK1,CNBP,CREBBP,CRTC3,CXXC1,DDX17,DDX39B,DDX3X,DNAJC2,DNM2,EDF1,ESRRA,FAM58A,FUS,GTF2B,HDAC2,HMGA1,HMGA2,HMGB2,HNRNPD,HNRNPU,HOXC10,HTATIP2,ILF3,ING2,ING4,KAT6B,KDM1A,LMO7,MEF2D,MORF4L2,MTF2,NCL,NCOA3,NFAT5,NFIC,NPM1,NSD1,PARP1,PHF8,PICALM,POU2F1,PSIP1,RBM14,RBMX,RNF20,RPRD1B,RREB1,RUVBL1,RUVBL2,SAFB,SFPQ,SMARCA5,SNW1,SUB1,SUPT16H,TARDBP,TCERG1,TFAM,TFAP2A,TFAP4,TFC…
GO:0048522	positive regulation of cellular process	148	4898	5.45e-14	ENSP00000199320,ENSP00000204517,ENSP00000216181,ENSP00000216297,ENSP00000216714,ENSP00000217182,ENSP00000219150,ENSP00000220325,ENSP00000221419,ENSP00000224073,ENSP00000225792,ENSP00000228251,ENSP00000233078,ENSP00000240185,ENSP00000254108,ENSP00000254719,ENSP00000256383,ENSP00000257915,ENSP00000261531,ENSP00000261600,ENSP00000262367,ENSP00000262887,ENSP00000265073,ENSP00000265433,ENSP00000268184…	ACACB,ADRM1,AKT2,ALYREF,APEX1,ARHGDIA,ARRB2,AURKB,BTK,CALM1,CARM1,CBFB,CDC20,CDK1,CENPV,CHD1L,CHD7,CHEK1,CNBP,CORO1A,CREBBP,CRTC3,CXXC1,DAZAP1,DDB1,DDX17,DDX39B,DDX3X,DDX5,DIMT1,DKC1,DNAJC2,DNM2,DNMT1,DOCK1,EDF1,EEF1A2,EEF2,EHD4,EIF2S1,ELAVL1,ESRRA,FAM58A,FAM98B,FLNA,FMR1,FUS,GNB2L1,GRB2,GTF2B,HDAC2,HMGA1,HMGA2,HMGB2,HNRNPA1,HNRNPA2B1,HNRNPD,HNRNPL,HNRNPLL,HNRNPU,HOXC10,HTATIP2,ILF3,ING2,ING3,ING…
GO:0050789	regulation of biological process	252	11116	1.5e-13	ENSP00000070846,ENSP00000199320,ENSP00000204517,ENSP00000216181,ENSP00000216297,ENSP00000216639,ENSP00000216714,ENSP00000217182,ENSP00000219150,ENSP00000220325,ENSP00000221419,ENSP00000224073,ENSP00000225792,ENSP00000228251,ENSP00000233078,ENSP00000240185,ENSP00000246194,ENSP00000250113,ENSP00000250916,ENSP00000253363,ENSP00000254108,ENSP00000254719,ENSP00000254730,ENSP00000256383,ENSP00000257915…	ACACB,ADRM1,AHNAK,AKT2,ALDOA,ALYREF,ANP32A,APEX1,API5,ARHGDIA,ARRB2,AURKB,BANF1,BAZ2A,BTK,C4orf27,CALM1,CARM1,CBFB,CBX3,CDC20,CDK1,CELF1,CELF2,CENPV,CHAF1B,CHD1L,CHD7,CHD9,CHEK1,CNBP,CORO1A,CPSF6,CPSF7,CREBBP,CRTC3,CXXC1,DAZAP1,DDB1,DDX1,DDX17,DDX21,DDX39B,DDX3X,DDX5,DDX6,DEK,DIMT1,DKC1,DNAJB11,DNAJC2,DNM2,DNMT1,DOCK1,EDF1,EEF1A1,EEF1A2,EEF1D,EEF2,EEFSEC,EHD4,EIF2S1,EIF4A1,ELAVL1,ESRRA,ETF1,EWSR1…
GO:0034248	regulation of cellular amide metabolic process	34	379	3.71e-13	ENSP00000217182,ENSP00000221419,ENSP00000228251,ENSP00000250113,ENSP00000254730,ENSP00000256383,ENSP00000278572,ENSP00000296411,ENSP00000296930,ENSP00000302886,ENSP00000307940,ENSP00000313199,ENSP00000318195,ENSP00000326031,ENSP00000332706,ENSP00000333667,ENSP00000337632,ENSP00000339063,ENSP00000353741,ENSP00000356448,ENSP00000358635,ENSP00000359506,ENSP00000370745,ENSP00000375730,ENSP00000375892…	AKT2,CELF1,DDX1,DDX39B,DDX3X,DDX6,EEF1A1,EEF1A2,EEF2,EEFSEC,EIF2S1,ELAVL1,ETF1,FMR1,FXR2,GNB2L1,HNRNPD,HNRNPL,ILF3,METAP1,NCL,NPM1,PA2G4,PICALM,PPP1CA,PURA,RPL13A,RPS3,SARNP,SHMT2,SYNCRIP,TPR,UPF1,YBX3
GO:0044403	symbiont process	44	650	4.58e-13	ENSP00000204517,ENSP00000240185,ENSP00000261531,ENSP00000261600,ENSP00000262367,ENSP00000268184,ENSP00000283629,ENSP00000293831,ENSP00000296930,ENSP00000300026,ENSP00000301764,ENSP00000310275,ENSP00000323065,ENSP00000325690,ENSP00000341826,ENSP00000346067,ENSP00000346762,ENSP00000348461,ENSP00000349467,ENSP00000352438,ENSP00000354522,ENSP00000354720,ENSP00000356448,ENSP00000358497,ENSP00000358635…	ALYREF,BANF1,CALM1,CARM1,CDK1,CREBBP,CRTC3,DDB1,DDX39B,DDX3X,DDX6,DEK,EIF4A1,FMR1,GADD45GIP1,GNB2L1,GRB2,GTF2B,HMGA1,HMGA2,HNRNPA1,HTATIP2,NPM1,NXF1,PCBP2,PPIB,PSIP1,RAC1,RCC1,RNGTT,RPSA,SMC3,SND1,SNW1,SSB,SYNCRIP,TARDBP,TFAP4,THOC1,THOC5,TOP1,TPR,UBP1,YWHAB
GO:0043933	protein-containing complex subunit organization	76	1770	8.6e-13	ENSP00000204517,ENSP00000216297,ENSP00000220325,ENSP00000231004,ENSP00000254719,ENSP00000254940,ENSP00000256383,ENSP00000260129,ENSP00000261531,ENSP00000262367,ENSP00000266679,ENSP00000268184,ENSP00000283131,ENSP00000287239,ENSP00000292431,ENSP00000296503,ENSP00000296930,ENSP00000299736,ENSP00000301280,ENSP00000301764,ENSP00000307181,ENSP00000307705,ENSP00000312625,ENSP00000315700,ENSP00000318297…	ACACB,ADRM1,AHNAK,ALDOA,BAZ2A,CDK1,CELF1,CELF2,CENPV,CHAF1A,CHAF1B,CHD1L,CPSF6,CPSF7,CREBBP,CRTC3,DDB1,DDX1,DDX39B,DDX3X,DDX6,DNM2,EHD4,EIF2S1,ELAVL1,ETF1,FAM103A1,G3BP1,GADD45GIP1,GRB2,GTF2B,HELLS,HIST1H1C,HIST1H1E,HIST1H2BF,HMGA1,HMGB2,HP1BP3,IMPDH2,KAT6B,KIF2C,LOX,NACC1,NAP1L1,NF1,NIP7,NPM1,OAS1,PARP1,PICALM,POLR1E,PPP1CA,PRPF8,PSIP1,RAC1,RBBP7,RBMX,RCC1,RPA1,RPS27,RPSA,RUVBL1,RUVBL2,SF1,SHMT2…
GO:1903507	negative regulation of nucleic acid-templated transcription	61	1220	1.07e-12	ENSP00000204517,ENSP00000216714,ENSP00000225792,ENSP00000228251,ENSP00000250916,ENSP00000261531,ENSP00000262367,ENSP00000276079,ENSP00000283131,ENSP00000283179,ENSP00000283629,ENSP00000287239,ENSP00000292431,ENSP00000296503,ENSP00000296702,ENSP00000300093,ENSP00000302886,ENSP00000307705,ENSP00000313950,ENSP00000329097,ENSP00000332194,ENSP00000332706,ENSP00000336687,ENSP00000339566,ENSP00000340271…	APEX1,AURKB,BAZ2A,CBFB,CBX3,CNBP,CREBBP,DDX5,DNMT1,ESRRA,FLNA,HDAC2,HELLS,HIST1H1C,HIST1H1E,HIST2H2AC,HMGA1,HMGA2,HMGB2,HNRNPA2B1,HNRNPU,ILF3,ING4,KAT6B,KDM1A,KLF16,LYAR,MAFK,MORF4L2,MTF2,MYBBP1A,NACC1,NFIC,NONO,NSD1,PA2G4,PARP1,PHF14,PHF6,PLK1,POU2F1,PPP1R13L,PSPC1,PURA,RBBP7,RREB1,RUVBL2,SF1,SFPQ,SMARCA5,SNW1,TAF3,TCERG1,TFAP2A,TFAP4,TPR,TRIM33,UBP1,UHRF1,YBX3,YWHAB
GO:0006417	regulation of translation	31	327	1.47e-12	ENSP00000221419,ENSP00000228251,ENSP00000250113,ENSP00000254730,ENSP00000256383,ENSP00000278572,ENSP00000296411,ENSP00000296930,ENSP00000302886,ENSP00000307940,ENSP00000313199,ENSP00000318195,ENSP00000326031,ENSP00000332706,ENSP00000333667,ENSP00000337632,ENSP00000353741,ENSP00000356448,ENSP00000358635,ENSP00000359506,ENSP00000370745,ENSP00000375730,ENSP00000375892,ENSP00000379475,ENSP00000382840…	AKT2,CELF1,DDX1,DDX39B,DDX3X,DDX6,EEF2,EEFSEC,EIF2S1,ELAVL1,ETF1,FMR1,FXR2,GNB2L1,HNRNPD,HNRNPL,ILF3,METAP1,NCL,NPM1,PA2G4,PPP1CA,PURA,RPL13A,RPS3,SARNP,SHMT2,SYNCRIP,TPR,UPF1,YBX3
GO:0051052	regulation of DNA metabolic process	33	381	2.22e-12	ENSP00000261600,ENSP00000262887,ENSP00000265433,ENSP00000278572,ENSP00000283179,ENSP00000296930,ENSP00000302111,ENSP00000313199,ENSP00000313950,ENSP00000323421,ENSP00000323511,ENSP00000338573,ENSP00000341826,ENSP00000346694,ENSP00000348461,ENSP00000352516,ENSP00000354720,ENSP00000355759,ENSP00000357283,ENSP00000358563,ENSP00000365694,ENSP00000367787,ENSP00000368565,ENSP00000378699,ENSP00000379475…	ALYREF,ARRB2,AURKB,CDK1,CHEK1,DDX39B,DEK,DKC1,DNAJC2,DNMT1,GNL3L,HMGA2,HNRNPA1,HNRNPA2B1,HNRNPD,HNRNPU,KDM1A,LIG3,LMNA,MGMT,NBN,NPM1,PARP1,PNKP,PPP1R10,RAC1,RPS3,SMC1A,SMC3,THOC1,UHRF1,UPF1,XRCC1
GO:0045893	positive regulation of transcription, DNA-templated	66	1435	3.16e-12	ENSP00000204517,ENSP00000216297,ENSP00000224073,ENSP00000240185,ENSP00000257915,ENSP00000261531,ENSP00000261600,ENSP00000262367,ENSP00000265073,ENSP00000268184,ENSP00000271555,ENSP00000283131,ENSP00000283179,ENSP00000287239,ENSP00000296503,ENSP00000296930,ENSP00000307183,ENSP00000307321,ENSP00000311747,ENSP00000313199,ENSP00000314129,ENSP00000318195,ENSP00000325690,ENSP00000349748,ENSP00000350676…	ALYREF,CARM1,CBFB,CHD7,CHEK1,CNBP,CREBBP,CRTC3,CXXC1,DDX17,DDX39B,DDX3X,DNAJC2,DNM2,EDF1,ESRRA,FAM58A,GTF2B,HDAC2,HMGA1,HMGA2,HMGB2,HNRNPD,HNRNPU,HOXC10,ILF3,ING2,KAT6B,KDM1A,LMO7,MEF2D,MORF4L2,MTF2,NCL,NCOA3,NFAT5,NFIC,NPM1,NSD1,PARP1,PHF8,PICALM,POU2F1,PSIP1,RBM14,RBMX,RNF20,RPRD1B,RREB1,RUVBL2,SAFB,SFPQ,SMARCA5,SNW1,SUB1,SUPT16H,TARDBP,TFAM,TFAP2A,TFAP4,TFCP2,TFE3,THOC1,THOC5,TOP2A,UHRF1
GO:0042254	ribosome biogenesis	28	270	3.45e-12	ENSP00000199320,ENSP00000225298,ENSP00000230340,ENSP00000254940,ENSP00000296930,ENSP00000301364,ENSP00000302886,ENSP00000306565,ENSP00000309126,ENSP00000338573,ENSP00000339095,ENSP00000345917,ENSP00000346067,ENSP00000346120,ENSP00000357555,ENSP00000358563,ENSP00000361010,ENSP00000361076,ENSP00000366396,ENSP00000380033,ENSP00000382840,ENSP00000392028,ENSP00000393241,ENSP00000407323,ENSP00000449328…	BYSL,CHD7,DDX17,DDX21,DDX3X,DDX52,DIMT1,DKC1,EBNA1BP2,GNL3L,ISG20,LYAR,NIP7,NOP16,NPM1,NSUN5,PA2G4,REXO4,RPL27,RPL7A,RPLP0,RPS18,RPS27,RPS7,RPSA,TSR1,UTP18,XRN2
GO:0034622	cellular protein-containing complex assembly	48	832	6.7e-12	ENSP00000254719,ENSP00000254940,ENSP00000256383,ENSP00000260129,ENSP00000261531,ENSP00000266679,ENSP00000283131,ENSP00000287239,ENSP00000296503,ENSP00000296930,ENSP00000299736,ENSP00000301280,ENSP00000301764,ENSP00000307181,ENSP00000307705,ENSP00000312625,ENSP00000315700,ENSP00000318297,ENSP00000339566,ENSP00000345412,ENSP00000346067,ENSP00000348461,ENSP00000348924,ENSP00000355759,ENSP00000357555…	ADRM1,BAZ2A,CELF1,CELF2,CENPV,CHAF1A,CHAF1B,CHD1L,CPSF6,CPSF7,DDB1,DDX1,DDX39B,DDX3X,DDX6,DNM2,EIF2S1,FAM103A1,G3BP1,GTF2B,HELLS,HIST1H1C,HIST1H1E,HIST1H2BF,HMGB2,HP1BP3,KAT6B,NAP1L1,NIP7,NPM1,PARP1,PICALM,POLR1E,PRPF8,PSIP1,RAC1,RBBP7,RBMX,RPA1,RPS27,RPSA,RUVBL1,RUVBL2,SF1,SMARCA5,SNW1,TFAM,TGS1
GO:0045892	negative regulation of transcription, DNA-templated	58	1169	6.7e-12	ENSP00000204517,ENSP00000225792,ENSP00000228251,ENSP00000250916,ENSP00000261531,ENSP00000262367,ENSP00000276079,ENSP00000283131,ENSP00000283179,ENSP00000283629,ENSP00000287239,ENSP00000292431,ENSP00000296503,ENSP00000296702,ENSP00000300093,ENSP00000302886,ENSP00000307705,ENSP00000313950,ENSP00000329097,ENSP00000332194,ENSP00000332706,ENSP00000336687,ENSP00000339566,ENSP00000340271,ENSP00000343966…	AURKB,BAZ2A,CBFB,CBX3,CNBP,CREBBP,DDX5,DNMT1,ESRRA,FLNA,HDAC2,HELLS,HIST1H1C,HIST1H1E,HIST2H2AC,HMGA1,HMGA2,HMGB2,HNRNPA2B1,HNRNPU,ILF3,ING4,KAT6B,KDM1A,KLF16,LYAR,MAFK,MORF4L2,MTF2,MYBBP1A,NACC1,NFIC,NONO,NSD1,PA2G4,PARP1,PHF14,PHF6,PLK1,POU2F1,PPP1R13L,PSPC1,PURA,RBBP7,RREB1,SFPQ,SMARCA5,SNW1,TAF3,TCERG1,TFAP2A,TFAP4,TPR,TRIM33,UBP1,UHRF1,YBX3,YWHAB
GO:0065003	protein-containing complex assembly	67	1514	1.07e-11	ENSP00000204517,ENSP00000220325,ENSP00000254719,ENSP00000254940,ENSP00000256383,ENSP00000260129,ENSP00000261531,ENSP00000262367,ENSP00000266679,ENSP00000268184,ENSP00000283131,ENSP00000287239,ENSP00000292431,ENSP00000296503,ENSP00000296930,ENSP00000299736,ENSP00000301280,ENSP00000301764,ENSP00000307181,ENSP00000307705,ENSP00000312625,ENSP00000315700,ENSP00000318297,ENSP00000321584,ENSP00000333667…	ACACB,ADRM1,AHNAK,ALDOA,BAZ2A,CDK1,CELF1,CELF2,CENPV,CHAF1A,CHAF1B,CHD1L,CPSF6,CPSF7,CREBBP,CRTC3,DDB1,DDX1,DDX39B,DDX3X,DDX6,DNM2,EHD4,EIF2S1,ELAVL1,FAM103A1,G3BP1,GRB2,GTF2B,HELLS,HIST1H1C,HIST1H1E,HIST1H2BF,HMGA1,HMGB2,HP1BP3,IMPDH2,KAT6B,NACC1,NAP1L1,NIP7,NPM1,OAS1,PARP1,PICALM,POLR1E,PRPF8,PSIP1,RAC1,RBBP7,RBMX,RCC1,RPA1,RPS27,RPSA,RUVBL1,RUVBL2,SF1,SHMT2,SLC9A3R2,SMARCA5,SNW1,SPAST,TFAM,TFA…
GO:0065007	biological regulation	255	11740	3.5e-11	ENSP00000070846,ENSP00000199320,ENSP00000204517,ENSP00000216181,ENSP00000216297,ENSP00000216639,ENSP00000216714,ENSP00000217182,ENSP00000219150,ENSP00000220325,ENSP00000221419,ENSP00000224073,ENSP00000225792,ENSP00000228251,ENSP00000233078,ENSP00000240185,ENSP00000246194,ENSP00000250113,ENSP00000250916,ENSP00000253363,ENSP00000254108,ENSP00000254719,ENSP00000254730,ENSP00000256383,ENSP00000257915…	ACACB,ADRM1,AHNAK,AKT2,ALDOA,ALYREF,ANP32A,APEX1,API5,ARHGDIA,ARRB2,AURKB,BANF1,BAZ2A,BTK,C4orf27,CALM1,CARM1,CBFB,CBX3,CDC20,CDK1,CELF1,CELF2,CENPV,CHAF1B,CHD1L,CHD7,CHD9,CHEK1,CNBP,CORO1A,CPSF6,CPSF7,CREBBP,CRTC3,CXXC1,DAZAP1,DDB1,DDX1,DDX17,DDX21,DDX39B,DDX3X,DDX5,DDX6,DEK,DIMT1,DKC1,DNAJB11,DNAJC2,DNM2,DNMT1,DOCK1,EDF1,EEF1A1,EEF1A2,EEF1D,EEF2,EEFSEC,EHD4,EIF2S1,EIF4A1,ELAVL1,ESRRA,ETF1,EWSR1…
GO:0007049	cell cycle	59	1263	4.36e-11	ENSP00000216122,ENSP00000216181,ENSP00000216639,ENSP00000254719,ENSP00000263274,ENSP00000263384,ENSP00000265433,ENSP00000278572,ENSP00000283179,ENSP00000287437,ENSP00000296930,ENSP00000299736,ENSP00000300093,ENSP00000301280,ENSP00000302886,ENSP00000307183,ENSP00000310275,ENSP00000313851,ENSP00000313950,ENSP00000315700,ENSP00000318297,ENSP00000323065,ENSP00000323421,ENSP00000325690,ENSP00000326031…	AURKB,BANF1,CARM1,CDC20,CDK1,CENPV,CHAF1A,CHAF1B,CHEK1,DNM2,FAM32A,FLNA,GADD45GIP1,GNB2L1,HELLS,HMGA2,HNRNPU,ING2,ING4,KIF2C,LIG1,LIG3,LMNA,MCM3,MCM5,MYH10,MYH9,NBN,NPM1,NSMCE2,PA2G4,PDS5B,PHF8,PLK1,POLD2,PPP1CA,PPP1CB,PPP1CC,PTPN11,PTPN6,RAD54B,RBM7,RCC1,RCC2,RPA1,RPS3,RUVBL1,SMC1A,SMC3,SMC4,SMC5,SPAST,SPTBN1,TOP2A,TOP2B,TPR,UHRF1,UPF1,VRK1
GO:2001252	positive regulation of chromosome organization	21	160	7.88e-11	ENSP00000261531,ENSP00000265433,ENSP00000283179,ENSP00000287437,ENSP00000307183,ENSP00000313199,ENSP00000313950,ENSP00000323511,ENSP00000341826,ENSP00000346694,ENSP00000349748,ENSP00000352516,ENSP00000354957,ENSP00000356448,ENSP00000358563,ENSP00000359321,ENSP00000359506,ENSP00000365694,ENSP00000373772,ENSP00000383042,ENSP00000473172	AURKB,DKC1,DNMT1,FMR1,HNRNPA1,HNRNPA2B1,HNRNPD,HNRNPU,ING2,KDM1A,MTF2,NBN,NSMCE2,PNKP,PPP1R10,RNF20,RUVBL2,SFPQ,SMC5,SNW1,TPR
GO:0022618	ribonucleoprotein complex assembly	23	203	1.09e-10	ENSP00000254940,ENSP00000256383,ENSP00000260129,ENSP00000261531,ENSP00000266679,ENSP00000296930,ENSP00000307181,ENSP00000318297,ENSP00000345412,ENSP00000346067,ENSP00000357555,ENSP00000359645,ENSP00000366604,ENSP00000370109,ENSP00000370745,ENSP00000377681,ENSP00000379475,ENSP00000382840,ENSP00000435926,ENSP00000443926,ENSP00000460348,ENSP00000473172,ENSP00000478754	CELF1,CELF2,CPSF6,CPSF7,DDX1,DDX39B,DDX3X,DDX6,EIF2S1,FAM103A1,G3BP1,NIP7,NPM1,PRPF8,PSIP1,RBMX,RPS27,RPSA,RUVBL1,RUVBL2,SF1,SNW1,TGS1
GO:0016569	covalent chromatin modification	29	357	3.15e-10	ENSP00000216639,ENSP00000262367,ENSP00000287239,ENSP00000301764,ENSP00000307705,ENSP00000311747,ENSP00000313950,ENSP00000318297,ENSP00000320566,ENSP00000325690,ENSP00000339566,ENSP00000349748,ENSP00000350676,ENSP00000361066,ENSP00000369424,ENSP00000373772,ENSP00000377601,ENSP00000378699,ENSP00000380024,ENSP00000383042,ENSP00000388648,ENSP00000390475,ENSP00000394417,ENSP00000395929,ENSP00000430432…	AURKB,BAZ2A,CARM1,CDK1,CHEK1,CREBBP,CXXC1,DDB1,HDAC2,HELLS,HIST1H1C,HIST1H1E,HMGA2,ING3,ING4,KAT6B,KDM1A,MORF4L2,NCOA3,NSD1,PHF8,RBBP7,RBM14,RNF20,RUVBL1,RUVBL2,SFPQ,UHRF1,VRK1
GO:0022607	cellular component assembly	83	2343	7.84e-10	ENSP00000070846,ENSP00000204517,ENSP00000219150,ENSP00000220325,ENSP00000231004,ENSP00000254719,ENSP00000254940,ENSP00000256383,ENSP00000260129,ENSP00000261531,ENSP00000262367,ENSP00000265433,ENSP00000266679,ENSP00000268184,ENSP00000278572,ENSP00000283131,ENSP00000287239,ENSP00000292431,ENSP00000296503,ENSP00000296930,ENSP00000299736,ENSP00000300093,ENSP00000301280,ENSP00000301764,ENSP00000307181…	ACACB,ADRM1,AHNAK,ALDOA,AURKB,BAZ2A,CDC20,CDK1,CELF1,CELF2,CENPV,CHAF1A,CHAF1B,CHD1L,CORO1A,CPSF6,CPSF7,CREBBP,CRTC3,DDB1,DDX1,DDX39B,DDX3X,DDX6,DNM2,EHD4,EIF2S1,ELAVL1,FAM103A1,FLNA,G3BP1,GRB2,GTF2B,HELLS,HIST1H1C,HIST1H1E,HIST1H2BF,HMGA1,HMGA2,HMGB2,HP1BP3,IMPDH2,KAT6B,LOX,MYH10,NACC1,NAP1L1,NBN,NIP7,NPM1,OAS1,PARP1,PICALM,PKP2,PKP3,PLK1,POLR1E,PRPF8,PSIP1,RAC1,RBBP7,RBM14,RBMX,RCC1,RCC2,RPA1,R…
GO:0016570	histone modification	28	347	8.25e-10	ENSP00000216639,ENSP00000262367,ENSP00000287239,ENSP00000301764,ENSP00000307705,ENSP00000311747,ENSP00000313950,ENSP00000318297,ENSP00000320566,ENSP00000325690,ENSP00000339566,ENSP00000349748,ENSP00000350676,ENSP00000361066,ENSP00000369424,ENSP00000373772,ENSP00000378699,ENSP00000380024,ENSP00000383042,ENSP00000388648,ENSP00000390475,ENSP00000394417,ENSP00000395929,ENSP00000430432,ENSP00000437621…	AURKB,BAZ2A,CARM1,CDK1,CHEK1,CREBBP,CXXC1,DDB1,HDAC2,HIST1H1C,HIST1H1E,HMGA2,ING3,ING4,KAT6B,KDM1A,MORF4L2,NCOA3,NSD1,PHF8,RBBP7,RBM14,RNF20,RUVBL1,RUVBL2,SFPQ,UHRF1,VRK1
GO:0032392	DNA geometric change	14	63	8.25e-10	ENSP00000265433,ENSP00000296503,ENSP00000318297,ENSP00000332706,ENSP00000336606,ENSP00000346694,ENSP00000358262,ENSP00000359393,ENSP00000370745,ENSP00000377681,ENSP00000382840,ENSP00000399888,ENSP00000416739,ENSP00000473172	CHD1L,DDX1,DDX3X,G3BP1,HMGA1,HMGB2,HMGB3,HNRNPA2B1,NBN,PURA,RAD54B,RECQL,RUVBL1,RUVBL2
GO:0051301	cell division	33	483	8.25e-10	ENSP00000216181,ENSP00000216639,ENSP00000263274,ENSP00000278572,ENSP00000283179,ENSP00000287437,ENSP00000299736,ENSP00000300093,ENSP00000307183,ENSP00000313851,ENSP00000313950,ENSP00000318297,ENSP00000323421,ENSP00000326031,ENSP00000341779,ENSP00000349259,ENSP00000349961,ENSP00000353590,ENSP00000354522,ENSP00000354720,ENSP00000354957,ENSP00000356448,ENSP00000361298,ENSP00000361540,ENSP00000362937…	AURKB,CDC20,CDK1,CENPV,HELLS,HMGA2,HNRNPU,ING2,KIF2C,LIG1,LIG3,MYH10,MYH9,NSMCE2,PDS5B,PLK1,PPP1CA,PPP1CB,PPP1CC,RCC1,RCC2,RPS3,RUVBL1,SMC1A,SMC3,SMC4,SMC5,SPAST,SPTBN1,TOP1,TOP2A,TPR,VRK1
GO:0071824	protein-DNA complex subunit organization	24	253	1.06e-09	ENSP00000216297,ENSP00000254719,ENSP00000283131,ENSP00000287239,ENSP00000296503,ENSP00000296930,ENSP00000299736,ENSP00000301280,ENSP00000301764,ENSP00000307705,ENSP00000312625,ENSP00000315700,ENSP00000318297,ENSP00000339566,ENSP00000348924,ENSP00000355759,ENSP00000358262,ENSP00000359531,ENSP00000367029,ENSP00000369424,ENSP00000377601,ENSP00000399888,ENSP00000446880,ENSP00000477538	BAZ2A,CENPV,CHAF1A,CHAF1B,CHD1L,DDB1,GTF2B,HELLS,HIST1H1C,HIST1H1E,HIST1H2BF,HMGA1,HMGB2,HP1BP3,KAT6B,NAP1L1,NPM1,PARP1,POLR1E,RBBP7,RPA1,RUVBL1,SMARCA5,SUPT16H
GO:0033043	regulation of organelle organization	53	1155	1.29e-09	ENSP00000219150,ENSP00000261531,ENSP00000262887,ENSP00000265433,ENSP00000269321,ENSP00000278572,ENSP00000283179,ENSP00000287437,ENSP00000296930,ENSP00000299736,ENSP00000300093,ENSP00000307183,ENSP00000311747,ENSP00000313199,ENSP00000313950,ENSP00000315630,ENSP00000323421,ENSP00000323511,ENSP00000338573,ENSP00000341826,ENSP00000346694,ENSP00000348461,ENSP00000349259,ENSP00000349748,ENSP00000350676…	AKT2,ARHGDIA,ARRB2,AURKB,CDC20,CENPV,CHEK1,CORO1A,DKC1,DNM2,DNMT1,FLNA,FMR1,GNL3L,GRB2,HMGA1,HNRNPA1,HNRNPA2B1,HNRNPD,HNRNPU,ING2,KDM1A,LIG3,LMNA,MTF2,NBN,NPM1,NSD1,NSMCE2,PARP1,PHF8,PLK1,PNKP,PPP1R10,RAC1,RBM14,RCC1,RNF20,RPS3,RUVBL2,SFPQ,SMC1A,SMC3,SMC5,SNW1,SPTBN1,SWAP70,TOP2A,TPR,UHRF1,UPF1,XRCC1,YWHAB
GO:0006364	rRNA processing	21	192	1.66e-09	ENSP00000199320,ENSP00000225298,ENSP00000230340,ENSP00000301364,ENSP00000302886,ENSP00000306565,ENSP00000309126,ENSP00000339095,ENSP00000345917,ENSP00000346067,ENSP00000346120,ENSP00000357555,ENSP00000358563,ENSP00000361010,ENSP00000361076,ENSP00000366396,ENSP00000380033,ENSP00000392028,ENSP00000407323,ENSP00000464813,ENSP00000479504	BYSL,CHD7,DDX17,DDX21,DDX52,DIMT1,DKC1,EBNA1BP2,ISG20,LYAR,NSUN5,PA2G4,REXO4,RPL27,RPL7A,RPS27,RPS7,RPSA,TSR1,UTP18,XRN2
GO:0043484	regulation of RNA splicing	17	116	1.99e-09	ENSP00000221419,ENSP00000225792,ENSP00000233078,ENSP00000261531,ENSP00000283179,ENSP00000307863,ENSP00000341826,ENSP00000346694,ENSP00000349168,ENSP00000359506,ENSP00000359645,ENSP00000364639,ENSP00000367263,ENSP00000380033,ENSP00000390625,ENSP00000435777,ENSP00000435926	AHNAK,CELF1,DAZAP1,DDX17,DDX5,FMR1,HNRNPA1,HNRNPA2B1,HNRNPH1,HNRNPL,HNRNPLL,HNRNPU,RBM7,RBMX,RPS13,SNW1,U2AF2
GO:0051128	regulation of cellular component organization	81	2306	2.1e-09	ENSP00000216181,ENSP00000216639,ENSP00000219150,ENSP00000220325,ENSP00000254719,ENSP00000261531,ENSP00000262887,ENSP00000265073,ENSP00000265433,ENSP00000269321,ENSP00000278572,ENSP00000280333,ENSP00000283179,ENSP00000287437,ENSP00000296930,ENSP00000299736,ENSP00000300093,ENSP00000301764,ENSP00000307183,ENSP00000311747,ENSP00000313199,ENSP00000313950,ENSP00000315630,ENSP00000323421,ENSP00000323511…	AKT2,ALDOA,ARHGDIA,ARRB2,AURKB,CARM1,CBFB,CDC20,CENPV,CHD1L,CHEK1,CORO1A,DDB1,DDX39B,DDX3X,DKC1,DNM2,DNMT1,DOCK1,EHD4,ETF1,FLNA,FMR1,GNB2L1,GNL3L,GRB2,GTF2B,HDAC2,HMGA1,HNRNPA1,HNRNPA2B1,HNRNPD,HNRNPU,ING2,KDM1A,LIG3,LMNA,LYAR,MTF2,MYCBP2,MYH10,MYH9,NBN,NPM1,NSD1,NSMCE2,PARP1,PHF8,PICALM,PLK1,PNKP,PPP1R10,PTPN11,RAC1,RBBP7,RBM14,RCC1,RCC2,RNF20,RPA1,RPL13A,RPS3,RREB1,RUVBL2,SFPQ,SMC1A,SMC3,SMC5,S…
GO:0051169	nuclear transport	24	267	2.84e-09	ENSP00000261600,ENSP00000296930,ENSP00000298310,ENSP00000307863,ENSP00000310275,ENSP00000326261,ENSP00000337632,ENSP00000341826,ENSP00000346067,ENSP00000346694,ENSP00000356448,ENSP00000357283,ENSP00000365694,ENSP00000370109,ENSP00000379475,ENSP00000382091,ENSP00000386636,ENSP00000392985,ENSP00000399888,ENSP00000417864,ENSP00000420306,ENSP00000421592,ENSP00000436679,ENSP00000470142	ALKBH5,ALYREF,ANP32A,BANF1,DDX39B,HMGA1,HNRNPA1,HNRNPA2B1,HTATIP2,LMNA,NEMF,NPM1,NXF1,PPP1R10,PSIP1,RPSA,SARNP,SRRM1,SSB,THOC1,THOC5,TPR,U2AF2,UPF1
GO:0016032	viral process	35	571	3.08e-09	ENSP00000261531,ENSP00000262367,ENSP00000268184,ENSP00000283629,ENSP00000293831,ENSP00000296930,ENSP00000301764,ENSP00000310275,ENSP00000323065,ENSP00000325690,ENSP00000341826,ENSP00000346067,ENSP00000346762,ENSP00000348461,ENSP00000352438,ENSP00000354522,ENSP00000356448,ENSP00000358497,ENSP00000358635,ENSP00000359506,ENSP00000359531,ENSP00000361930,ENSP00000362937,ENSP00000370109,ENSP00000376345…	ALYREF,BANF1,CARM1,CDK1,CREBBP,CRTC3,DDB1,DDX3X,DDX6,DEK,EIF4A1,FMR1,GADD45GIP1,GNB2L1,GRB2,GTF2B,HMGA1,HNRNPA1,HTATIP2,NPM1,NXF1,PCBP2,PSIP1,RAC1,RCC1,RNGTT,RPSA,SND1,SNW1,SSB,SYNCRIP,TOP1,TPR,UBP1,YWHAB
GO:0065004	protein-DNA complex assembly	22	223	3.42e-09	ENSP00000254719,ENSP00000283131,ENSP00000287239,ENSP00000296503,ENSP00000296930,ENSP00000299736,ENSP00000301280,ENSP00000301764,ENSP00000307705,ENSP00000312625,ENSP00000315700,ENSP00000318297,ENSP00000339566,ENSP00000348924,ENSP00000355759,ENSP00000358262,ENSP00000359531,ENSP00000367029,ENSP00000369424,ENSP00000377601,ENSP00000446880,ENSP00000477538	BAZ2A,CENPV,CHAF1A,CHAF1B,CHD1L,DDB1,GTF2B,HELLS,HIST1H1C,HIST1H1E,HIST1H2BF,HMGB2,HP1BP3,KAT6B,NAP1L1,NPM1,PARP1,POLR1E,RBBP7,RPA1,RUVBL1,SMARCA5
GO:0006310	DNA recombination	21	202	3.76e-09	ENSP00000216714,ENSP00000254719,ENSP00000262887,ENSP00000263274,ENSP00000265433,ENSP00000276079,ENSP00000287437,ENSP00000296503,ENSP00000311747,ENSP00000315630,ENSP00000318297,ENSP00000336606,ENSP00000349748,ENSP00000354957,ENSP00000355759,ENSP00000359393,ENSP00000367787,ENSP00000396704,ENSP00000411532,ENSP00000416739,ENSP00000473172	APEX1,HMGB2,HMGB3,LIG1,LIG3,NBN,NONO,NSMCE2,PARP1,RAD54B,RBM14,RECQL,RPA1,RUVBL1,RUVBL2,SFPQ,SMC5,SWAP70,TOP2A,TOP2B,XRCC1
GO:1903312	negative regulation of mRNA metabolic process	14	74	4.91e-09	ENSP00000221419,ENSP00000228251,ENSP00000240185,ENSP00000283179,ENSP00000307863,ENSP00000313199,ENSP00000316042,ENSP00000331678,ENSP00000346694,ENSP00000358635,ENSP00000359506,ENSP00000359645,ENSP00000373772,ENSP00000385269	ELAVL1,FMR1,HNRNPA0,HNRNPA2B1,HNRNPD,HNRNPL,HNRNPU,PKP3,RBMX,RNF20,SYNCRIP,TARDBP,U2AF2,YBX3
GO:0050794	regulation of cellular process	230	10484	4.97e-09	ENSP00000070846,ENSP00000199320,ENSP00000204517,ENSP00000216181,ENSP00000216297,ENSP00000216639,ENSP00000216714,ENSP00000217182,ENSP00000219150,ENSP00000220325,ENSP00000221419,ENSP00000224073,ENSP00000225792,ENSP00000228251,ENSP00000233078,ENSP00000240185,ENSP00000246194,ENSP00000250113,ENSP00000250916,ENSP00000253363,ENSP00000254108,ENSP00000254719,ENSP00000254730,ENSP00000256383,ENSP00000257915…	ACACB,ADRM1,AHNAK,AKT2,ALDOA,ALYREF,ANP32A,APEX1,API5,ARHGDIA,ARRB2,AURKB,BAZ2A,BTK,C4orf27,CALM1,CARM1,CBFB,CBX3,CDC20,CDK1,CELF1,CENPV,CHAF1B,CHD1L,CHD7,CHD9,CHEK1,CNBP,CORO1A,CPSF6,CPSF7,CREBBP,CRTC3,CXXC1,DAZAP1,DDB1,DDX1,DDX17,DDX39B,DDX3X,DDX5,DDX6,DEK,DIMT1,DKC1,DNAJB11,DNAJC2,DNM2,DNMT1,DOCK1,EDF1,EEF1A1,EEF1A2,EEF1D,EEF2,EEFSEC,EHD4,EIF2S1,ELAVL1,ESRRA,ETF1,EWSR1,FAM58A,FAM83G,FAM98B,FLN…
GO:0006412	translation	27	362	8.78e-09	ENSP00000217182,ENSP00000254730,ENSP00000256383,ENSP00000278572,ENSP00000293831,ENSP00000307889,ENSP00000307940,ENSP00000323065,ENSP00000331901,ENSP00000339063,ENSP00000339095,ENSP00000346067,ENSP00000353741,ENSP00000357555,ENSP00000361076,ENSP00000362576,ENSP00000364119,ENSP00000375730,ENSP00000376056,ENSP00000377954,ENSP00000382840,ENSP00000393241,ENSP00000410059,ENSP00000426909,ENSP00000435777…	DDX3X,EEF1A1,EEF1A2,EEF1B2,EEF1D,EEF1G,EEF2,EEFSEC,EIF2S1,EIF2S2,EIF4A1,ETF1,GADD45GIP1,GNB2L1,LARS,RPL13,RPL13A,RPL27,RPL7A,RPLP0,RPS13,RPS18,RPS27,RPS3,RPS7,RPSA,YARS
GO:0006401	RNA catabolic process	22	237	9.59e-09	ENSP00000225792,ENSP00000278572,ENSP00000306565,ENSP00000307889,ENSP00000311677,ENSP00000313199,ENSP00000337623,ENSP00000339095,ENSP00000346067,ENSP00000346762,ENSP00000353741,ENSP00000357555,ENSP00000361076,ENSP00000366396,ENSP00000375730,ENSP00000386636,ENSP00000393241,ENSP00000435777,ENSP00000449328,ENSP00000464813,ENSP00000470142,ENSP00000478754	DDX5,DDX6,ETF1,HNRNPD,ISG20,PPP1R8,RNASEH2B,RPL13,RPL13A,RPL27,RPL7A,RPLP0,RPS13,RPS18,RPS27,RPS3,RPS7,RPSA,SND1,SSB,UPF1,XRN2
GO:0050684	regulation of mRNA processing	16	114	1.21e-08	ENSP00000221419,ENSP00000225792,ENSP00000233078,ENSP00000261531,ENSP00000266679,ENSP00000283179,ENSP00000307863,ENSP00000341826,ENSP00000345412,ENSP00000346694,ENSP00000359506,ENSP00000359645,ENSP00000364639,ENSP00000373772,ENSP00000380033,ENSP00000467423	CPSF6,CPSF7,DAZAP1,DDX17,DDX5,FMR1,HNRNPA1,HNRNPA2B1,HNRNPL,HNRNPU,RBM7,RBMX,RNF20,SAFB,SNW1,U2AF2
GO:0006323	DNA packaging	20	195	1.24e-08	ENSP00000283131,ENSP00000287239,ENSP00000296503,ENSP00000296930,ENSP00000299736,ENSP00000301280,ENSP00000307705,ENSP00000312625,ENSP00000315700,ENSP00000318297,ENSP00000339566,ENSP00000348924,ENSP00000349961,ENSP00000369424,ENSP00000377601,ENSP00000378699,ENSP00000399888,ENSP00000411532,ENSP00000437621,ENSP00000477538	CDK1,CENPV,CHAF1A,CHAF1B,HELLS,HIST1H1C,HIST1H1E,HIST1H2BF,HMGA1,HMGA2,HMGB2,HP1BP3,KAT6B,NAP1L1,NPM1,RBBP7,RUVBL1,SMARCA5,SMC4,TOP2A
GO:0032204	regulation of telomere maintenance	14	81	1.34e-08	ENSP00000262887,ENSP00000265433,ENSP00000283179,ENSP00000313199,ENSP00000313950,ENSP00000323511,ENSP00000338573,ENSP00000341826,ENSP00000346694,ENSP00000355759,ENSP00000357283,ENSP00000358563,ENSP00000365694,ENSP00000470142	AURKB,DKC1,GNL3L,HNRNPA1,HNRNPA2B1,HNRNPD,HNRNPU,LMNA,NBN,PARP1,PNKP,PPP1R10,UPF1,XRCC1
GO:0006338	chromatin remodeling	18	156	1.67e-08	ENSP00000283131,ENSP00000296930,ENSP00000299736,ENSP00000318297,ENSP00000336687,ENSP00000354522,ENSP00000358262,ENSP00000369424,ENSP00000377601,ENSP00000380414,ENSP00000388648,ENSP00000392028,ENSP00000394417,ENSP00000399888,ENSP00000430432,ENSP00000437621,ENSP00000446880,ENSP00000473172	BAZ2A,CBX3,CENPV,CHD1L,CHD7,CHEK1,DEK,HDAC2,HELLS,HMGA1,HMGA2,MORF4L2,NPM1,RBBP7,RUVBL1,RUVBL2,SMARCA5,TOP1
GO:0051704	multi-organism process	76	2222	2.91e-08	ENSP00000204517,ENSP00000228251,ENSP00000230340,ENSP00000233078,ENSP00000240185,ENSP00000261531,ENSP00000261600,ENSP00000262367,ENSP00000268184,ENSP00000283629,ENSP00000293831,ENSP00000296503,ENSP00000296930,ENSP00000300026,ENSP00000300093,ENSP00000301764,ENSP00000306565,ENSP00000307183,ENSP00000310275,ENSP00000316042,ENSP00000318297,ENSP00000323065,ENSP00000325690,ENSP00000331901,ENSP00000341826…	ALDOA,ALKBH5,ALYREF,BANF1,BTK,BYSL,CALM1,CARM1,CDK1,CELF1,CHD7,CREBBP,CRTC3,DAZAP1,DDB1,DDX1,DDX17,DDX21,DDX39B,DDX3X,DDX6,DEK,DNM2,EEF1G,EIF2S2,EIF4A1,FAM50A,FMR1,GADD45GIP1,GNB2L1,GRB2,GTF2B,HDAC2,HIST1H2BF,HMGA1,HMGA2,HMGB2,HNRNPA0,HNRNPA1,HNRNPUL1,HTATIP2,ILF3,ING2,ISG20,NPM1,NXF1,OAS1,PCBP2,PLK1,PPIB,PRPF8,PSIP1,RAC1,RCC1,RNGTT,RPSA,RUVBL1,SBF1,SLIRP,SMC3,SND1,SNW1,SSB,SYNCRIP,TARDBP,TFAP4,T…
GO:0034470	ncRNA processing	25	340	5.04e-08	ENSP00000199320,ENSP00000216038,ENSP00000225298,ENSP00000230340,ENSP00000301364,ENSP00000302886,ENSP00000306565,ENSP00000309126,ENSP00000339095,ENSP00000345917,ENSP00000346067,ENSP00000346120,ENSP00000346694,ENSP00000357555,ENSP00000358563,ENSP00000361010,ENSP00000361076,ENSP00000366396,ENSP00000370745,ENSP00000380033,ENSP00000386636,ENSP00000392028,ENSP00000407323,ENSP00000464813,ENSP00000479504	BYSL,CHD7,DDX1,DDX17,DDX21,DDX52,DIMT1,DKC1,EBNA1BP2,HNRNPA2B1,ISG20,LYAR,NSUN5,PA2G4,REXO4,RPL27,RPL7A,RPS27,RPS7,RPSA,RTCB,SSB,TSR1,UTP18,XRN2
GO:0090305	nucleic acid phosphodiester bond hydrolysis	23	287	5.04e-08	ENSP00000216714,ENSP00000254719,ENSP00000262887,ENSP00000266679,ENSP00000278572,ENSP00000296503,ENSP00000301364,ENSP00000301764,ENSP00000306565,ENSP00000311677,ENSP00000315791,ENSP00000323511,ENSP00000337623,ENSP00000345412,ENSP00000346067,ENSP00000346762,ENSP00000355759,ENSP00000358262,ENSP00000361010,ENSP00000366396,ENSP00000370745,ENSP00000377681,ENSP00000480186	APEX1,CHD1L,CPSF6,CPSF7,CSTF3,DDB1,DDX1,G3BP1,HMGB2,ISG20,PARP1,PNKP,POLD2,PPP1R8,REXO4,RNASEH2B,RPA1,RPS3,RPSA,SND1,TSR1,XRCC1,XRN2
GO:0006333	chromatin assembly or disassembly	18	174	7.96e-08	ENSP00000216297,ENSP00000283131,ENSP00000287239,ENSP00000296503,ENSP00000296930,ENSP00000299736,ENSP00000301280,ENSP00000307705,ENSP00000312625,ENSP00000315700,ENSP00000318297,ENSP00000339566,ENSP00000348924,ENSP00000369424,ENSP00000377601,ENSP00000399888,ENSP00000437621,ENSP00000477538	CENPV,CHAF1A,CHAF1B,HELLS,HIST1H1C,HIST1H1E,HIST1H2BF,HMGA1,HMGA2,HMGB2,HP1BP3,KAT6B,NAP1L1,NPM1,RBBP7,RUVBL1,SMARCA5,SUPT16H
GO:0043604	amide biosynthetic process	30	495	8.26e-08	ENSP00000217182,ENSP00000254730,ENSP00000256383,ENSP00000278572,ENSP00000293831,ENSP00000307241,ENSP00000307889,ENSP00000307940,ENSP00000323065,ENSP00000331901,ENSP00000339063,ENSP00000339095,ENSP00000341044,ENSP00000346067,ENSP00000353741,ENSP00000357555,ENSP00000361076,ENSP00000362576,ENSP00000364119,ENSP00000369134,ENSP00000375730,ENSP00000376056,ENSP00000377954,ENSP00000382840,ENSP00000393241…	ACACB,DDX3X,EEF1A1,EEF1A2,EEF1B2,EEF1D,EEF1G,EEF2,EEFSEC,EIF2S1,EIF2S2,EIF4A1,ETF1,GADD45GIP1,GNB2L1,LARS,PDHA1,PDHB,RPL13,RPL13A,RPL27,RPL7A,RPLP0,RPS13,RPS18,RPS27,RPS3,RPS7,RPSA,YARS
GO:0031497	chromatin assembly	17	154	8.92e-08	ENSP00000283131,ENSP00000287239,ENSP00000296503,ENSP00000296930,ENSP00000299736,ENSP00000301280,ENSP00000307705,ENSP00000312625,ENSP00000315700,ENSP00000318297,ENSP00000339566,ENSP00000348924,ENSP00000369424,ENSP00000377601,ENSP00000399888,ENSP00000437621,ENSP00000477538	CENPV,CHAF1A,CHAF1B,HELLS,HIST1H1C,HIST1H1E,HIST1H2BF,HMGA1,HMGA2,HMGB2,HP1BP3,KAT6B,NAP1L1,NPM1,RBBP7,RUVBL1,SMARCA5
GO:0034660	ncRNA metabolic process	30	497	8.92e-08	ENSP00000199320,ENSP00000216038,ENSP00000225298,ENSP00000230340,ENSP00000301364,ENSP00000302886,ENSP00000306565,ENSP00000309126,ENSP00000339095,ENSP00000345917,ENSP00000346067,ENSP00000346120,ENSP00000346694,ENSP00000356840,ENSP00000357555,ENSP00000358563,ENSP00000359531,ENSP00000361010,ENSP00000361076,ENSP00000362532,ENSP00000362576,ENSP00000366396,ENSP00000370745,ENSP00000377954,ENSP00000380033…	BYSL,CHD7,DDX1,DDX17,DDX21,DDX52,DIMT1,DKC1,EBNA1BP2,GTF2B,HNRNPA2B1,ISG20,LARS,LYAR,NSUN5,PA2G4,POU2F1,REXO4,RPL27,RPL7A,RPRD1B,RPS27,RPS7,RPSA,RTCB,SSB,TSR1,UTP18,XRN2,YARS
GO:0006950	response to stress	97	3267	1.06e-07	ENSP00000204517,ENSP00000216297,ENSP00000216714,ENSP00000219150,ENSP00000221419,ENSP00000228251,ENSP00000231004,ENSP00000240185,ENSP00000254719,ENSP00000256383,ENSP00000261531,ENSP00000262367,ENSP00000262887,ENSP00000263274,ENSP00000265433,ENSP00000276079,ENSP00000278412,ENSP00000278572,ENSP00000280333,ENSP00000287437,ENSP00000296503,ENSP00000296930,ENSP00000300093,ENSP00000301280,ENSP00000301764…	ALKBH5,APEX1,ARRB2,BTK,C4orf27,CARM1,CDK1,CHAF1A,CHAF1B,CHD1L,CHEK1,CORO1A,CREBBP,CXXC1,DDB1,DDX1,DDX17,DDX3X,DNAJB11,DNM2,DOCK1,EEF2,EIF2S1,FLNA,FMR1,GRB2,HDAC2,HIST1H2BF,HMGA1,HMGA2,HMGB2,HMGB3,HNRNPA0,HNRNPA1,HNRNPD,HNRNPL,HP1BP3,ILF3,ING4,ISG20,KDM1A,LARS,LIG1,LIG3,LMNA,LOX,MAFK,MGMT,MORF4L2,MYBBP1A,MYH10,NBN,NF1,NONO,NPM1,NSMCE2,OAS1,PARP1,PCBP2,PDS5B,PLK1,PNKP,POLD2,PPP1CA,PSIP1,PSPC1,PTPN1…
GO:0017148	negative regulation of translation	15	117	1.2e-07	ENSP00000250113,ENSP00000256383,ENSP00000278572,ENSP00000313199,ENSP00000318195,ENSP00000332706,ENSP00000356448,ENSP00000358635,ENSP00000359506,ENSP00000375730,ENSP00000382840,ENSP00000404121,ENSP00000426909,ENSP00000435926,ENSP00000470142	CELF1,DDX3X,EIF2S1,FMR1,FXR2,GNB2L1,HNRNPD,ILF3,NCL,PURA,RPL13A,RPS3,SYNCRIP,TPR,UPF1
GO:1902369	negative regulation of RNA catabolic process	11	51	1.23e-07	ENSP00000228251,ENSP00000240185,ENSP00000283179,ENSP00000313199,ENSP00000316042,ENSP00000331678,ENSP00000358563,ENSP00000358635,ENSP00000359506,ENSP00000385269,ENSP00000450909	DKC1,ELAVL1,FMR1,HNRNPA0,HNRNPD,HNRNPU,PKP3,SLIRP,SYNCRIP,TARDBP,YBX3
GO:0045944	positive regulation of transcription by RNA polymerase II	47	1104	1.56e-07	ENSP00000204517,ENSP00000216297,ENSP00000240185,ENSP00000257915,ENSP00000261531,ENSP00000262367,ENSP00000265073,ENSP00000268184,ENSP00000271555,ENSP00000283179,ENSP00000296503,ENSP00000296930,ENSP00000307321,ENSP00000311747,ENSP00000314129,ENSP00000318195,ENSP00000325690,ENSP00000349748,ENSP00000355759,ENSP00000356840,ENSP00000359321,ENSP00000359531,ENSP00000359645,ENSP00000361066,ENSP00000362532…	CARM1,CBFB,CHD7,CNBP,CREBBP,CRTC3,DDX17,DDX3X,ESRRA,FAM58A,GTF2B,HDAC2,HMGA1,HMGA2,HMGB2,HNRNPU,HOXC10,KDM1A,LMO7,MEF2D,MORF4L2,MTF2,NCL,NCOA3,NFAT5,NFIC,NPM1,PARP1,POU2F1,PSIP1,RBM14,RBMX,RPRD1B,RREB1,RUVBL2,SAFB,SFPQ,SNW1,SUB1,SUPT16H,TARDBP,TFAP2A,TFAP4,TFCP2,TFE3,TOP2A,UHRF1
GO:0032508	DNA duplex unwinding	11	53	1.73e-07	ENSP00000265433,ENSP00000318297,ENSP00000332706,ENSP00000336606,ENSP00000358262,ENSP00000370745,ENSP00000377681,ENSP00000382840,ENSP00000399888,ENSP00000416739,ENSP00000473172	CHD1L,DDX1,DDX3X,G3BP1,HMGA1,NBN,PURA,RAD54B,RECQL,RUVBL1,RUVBL2
GO:0043487	regulation of RNA stability	15	122	1.95e-07	ENSP00000216714,ENSP00000228251,ENSP00000240185,ENSP00000283179,ENSP00000296930,ENSP00000313199,ENSP00000316042,ENSP00000358563,ENSP00000358635,ENSP00000359506,ENSP00000360034,ENSP00000361930,ENSP00000385269,ENSP00000417864,ENSP00000470142	ANP32A,APEX1,DKC1,ELAVL1,FMR1,HNRNPA0,HNRNPD,HNRNPU,NPM1,SERBP1,SYNCRIP,TARDBP,UPF1,YBX3,YWHAB
GO:0006366	transcription by RNA polymerase II	38	784	2.03e-07	ENSP00000204517,ENSP00000216297,ENSP00000225792,ENSP00000240185,ENSP00000257915,ENSP00000261531,ENSP00000262367,ENSP00000265073,ENSP00000271555,ENSP00000278412,ENSP00000296702,ENSP00000307321,ENSP00000313199,ENSP00000314129,ENSP00000315791,ENSP00000340271,ENSP00000345412,ENSP00000346120,ENSP00000355759,ENSP00000356840,ENSP00000358497,ENSP00000358866,ENSP00000359531,ENSP00000359645,ENSP00000362532…	ADRM1,ARRB2,CBFB,CPSF7,CREBBP,CSTF3,DDX21,DDX5,DEK,ESRRA,FLNA,GTF2B,GTF2I,HMGA1,HMGA2,HNRNPD,HOXC10,MEF2D,NFAT5,NFIC,PARP1,POU2F1,RBMX,RNGTT,RNMT,RPRD1B,RREB1,SNW1,SSRP1,SUB1,SUPT16H,TAF3,TARDBP,TCERG1,TFAP2A,TFAP4,TFCP2,TFE3
GO:0006403	RNA localization	19	211	2.18e-07	ENSP00000261600,ENSP00000283179,ENSP00000307863,ENSP00000326261,ENSP00000337632,ENSP00000341826,ENSP00000346067,ENSP00000346694,ENSP00000356448,ENSP00000358563,ENSP00000359506,ENSP00000376309,ENSP00000379475,ENSP00000382091,ENSP00000386636,ENSP00000420306,ENSP00000421592,ENSP00000436679,ENSP00000470142	ALKBH5,ALYREF,DDX39B,DKC1,FMR1,HNRNPA1,HNRNPA2B1,HNRNPA3,HNRNPU,NXF1,RPSA,SARNP,SRRM1,SSB,THOC1,THOC5,TPR,U2AF2,UPF1
GO:0006913	nucleocytoplasmic transport	21	263	2.53e-07	ENSP00000261600,ENSP00000296930,ENSP00000298310,ENSP00000307863,ENSP00000326261,ENSP00000337632,ENSP00000341826,ENSP00000346067,ENSP00000346694,ENSP00000356448,ENSP00000357283,ENSP00000365694,ENSP00000379475,ENSP00000382091,ENSP00000386636,ENSP00000392985,ENSP00000417864,ENSP00000420306,ENSP00000421592,ENSP00000436679,ENSP00000470142	ALKBH5,ALYREF,ANP32A,DDX39B,HNRNPA1,HNRNPA2B1,HTATIP2,LMNA,NEMF,NPM1,NXF1,PPP1R10,RPSA,SARNP,SRRM1,SSB,THOC1,THOC5,TPR,U2AF2,UPF1
GO:0051726	regulation of cell cycle	47	1129	2.94e-07	ENSP00000204517,ENSP00000216714,ENSP00000240185,ENSP00000261600,ENSP00000265433,ENSP00000283179,ENSP00000287437,ENSP00000296930,ENSP00000299736,ENSP00000300093,ENSP00000301764,ENSP00000302886,ENSP00000311747,ENSP00000313950,ENSP00000323065,ENSP00000323421,ENSP00000325690,ENSP00000336687,ENSP00000337623,ENSP00000340944,ENSP00000349467,ENSP00000349748,ENSP00000354720,ENSP00000354957,ENSP00000356448…	AKT2,APEX1,AURKB,CALM1,CARM1,CBX3,CDC20,CDK1,CENPV,CHEK1,DDB1,DDX39B,DDX3X,FAM58A,GADD45GIP1,GNB2L1,HMGA2,HNRNPU,ING4,MYBBP1A,NBN,NPM1,NSMCE2,PA2G4,PLK1,PPP1R10,PTPN11,PTPN6,RBBP7,RBM14,RCC1,RCC2,RNASEH2B,RPRD1B,SFPQ,SMC1A,SMC3,SMC5,SPAST,STK24,TARDBP,TFAP4,THOC1,THOC5,TOP2A,TOP2B,TPR
GO:0006357	regulation of transcription by RNA polymerase II	82	2633	3.3e-07	ENSP00000204517,ENSP00000216297,ENSP00000225792,ENSP00000228251,ENSP00000240185,ENSP00000250916,ENSP00000257915,ENSP00000261531,ENSP00000262367,ENSP00000265073,ENSP00000268184,ENSP00000271555,ENSP00000276079,ENSP00000278412,ENSP00000283131,ENSP00000283179,ENSP00000283629,ENSP00000296503,ENSP00000296702,ENSP00000296930,ENSP00000300093,ENSP00000307321,ENSP00000307705,ENSP00000311747,ENSP00000313950…	AURKB,CARM1,CBFB,CHD7,CHEK1,CNBP,CREBBP,CRTC3,CXXC1,DDX17,DDX3X,DDX5,DEK,DNAJC2,DNMT1,ESRRA,FAM58A,FAM83G,GTF2B,GTF2I,HDAC2,HIST1H1C,HIST1H1E,HMGA1,HMGA2,HMGB2,HNRNPA2B1,HNRNPU,HOXC10,HTATIP2,KDM1A,KLF16,LMO7,LYAR,MAFK,MEF2D,MORF4L2,MTF2,MYEF2,NCL,NCOA3,NFAT5,NFIC,NONO,NPM1,NSD1,PARP1,PHF14,PHF6,PLK1,POU2F1,PPP1R13L,PSIP1,PSPC1,PURA,RBBP7,RBM14,RBMX,RPRD1B,RREB1,RUVBL1,RUVBL2,SAFB,SFPQ,SMARCA5,SN…
GO:0043488	regulation of mRNA stability	14	113	5.45e-07	ENSP00000216714,ENSP00000228251,ENSP00000240185,ENSP00000283179,ENSP00000296930,ENSP00000313199,ENSP00000316042,ENSP00000358635,ENSP00000359506,ENSP00000360034,ENSP00000361930,ENSP00000385269,ENSP00000417864,ENSP00000470142	ANP32A,APEX1,ELAVL1,FMR1,HNRNPA0,HNRNPD,HNRNPU,NPM1,SERBP1,SYNCRIP,TARDBP,UPF1,YBX3,YWHAB
GO:0022402	cell cycle process	40	890	5.62e-07	ENSP00000216122,ENSP00000216181,ENSP00000216639,ENSP00000254719,ENSP00000263274,ENSP00000265433,ENSP00000278572,ENSP00000296930,ENSP00000300093,ENSP00000302886,ENSP00000307183,ENSP00000310275,ENSP00000313851,ENSP00000313950,ENSP00000323065,ENSP00000323421,ENSP00000325690,ENSP00000336606,ENSP00000349259,ENSP00000349961,ENSP00000350676,ENSP00000353590,ENSP00000354720,ENSP00000354957,ENSP00000356448…	AURKB,BANF1,CARM1,CDC20,CDK1,DNM2,FLNA,GADD45GIP1,HMGA2,ING2,ING4,KIF2C,LIG1,LMNA,MCM3,MCM5,MYH10,MYH9,NBN,NPM1,PA2G4,PDS5B,PHF8,PLK1,POLD2,RAD54B,RCC1,RPA1,RPS3,SMC1A,SMC3,SMC4,SMC5,SPAST,SPTBN1,TOP2A,TOP2B,TPR,UPF1,VRK1
GO:0040029	regulation of gene expression, epigenetic	20	251	5.7e-07	ENSP00000283131,ENSP00000283179,ENSP00000332194,ENSP00000346120,ENSP00000346694,ENSP00000350676,ENSP00000352516,ENSP00000359321,ENSP00000367029,ENSP00000369424,ENSP00000370968,ENSP00000377601,ENSP00000380414,ENSP00000388648,ENSP00000394417,ENSP00000399888,ENSP00000430432,ENSP00000435926,ENSP00000446880,ENSP00000470142	BAZ2A,CELF1,CHEK1,DDX21,DEK,DNMT1,HDAC2,HELLS,HIST2H2AC,HMGA1,HNRNPA2B1,HNRNPU,MORF4L2,MTF2,MYBBP1A,PHF8,POLR1E,RBBP7,SMARCA5,UPF1
GO:0048024	regulation of mRNA splicing, via spliceosome	12	77	5.7e-07	ENSP00000221419,ENSP00000225792,ENSP00000233078,ENSP00000261531,ENSP00000283179,ENSP00000307863,ENSP00000341826,ENSP00000346694,ENSP00000359506,ENSP00000359645,ENSP00000364639,ENSP00000380033	DAZAP1,DDX17,DDX5,FMR1,HNRNPA1,HNRNPA2B1,HNRNPL,HNRNPU,RBM7,RBMX,SNW1,U2AF2
GO:0006405	RNA export from nucleus	15	134	5.73e-07	ENSP00000261600,ENSP00000307863,ENSP00000326261,ENSP00000337632,ENSP00000341826,ENSP00000346067,ENSP00000346694,ENSP00000356448,ENSP00000379475,ENSP00000382091,ENSP00000386636,ENSP00000420306,ENSP00000421592,ENSP00000436679,ENSP00000470142	ALKBH5,ALYREF,DDX39B,HNRNPA1,HNRNPA2B1,NXF1,RPSA,SARNP,SRRM1,SSB,THOC1,THOC5,TPR,U2AF2,UPF1
GO:0061013	regulation of mRNA catabolic process	15	134	5.73e-07	ENSP00000216714,ENSP00000228251,ENSP00000240185,ENSP00000283179,ENSP00000296930,ENSP00000313199,ENSP00000316042,ENSP00000331678,ENSP00000358635,ENSP00000359506,ENSP00000360034,ENSP00000361930,ENSP00000385269,ENSP00000417864,ENSP00000470142	ANP32A,APEX1,ELAVL1,FMR1,HNRNPA0,HNRNPD,HNRNPU,NPM1,PKP3,SERBP1,SYNCRIP,TARDBP,UPF1,YBX3,YWHAB
GO:0010639	negative regulation of organelle organization	23	333	5.88e-07	ENSP00000219150,ENSP00000262887,ENSP00000265433,ENSP00000283179,ENSP00000296930,ENSP00000300093,ENSP00000311747,ENSP00000315630,ENSP00000338573,ENSP00000341826,ENSP00000349259,ENSP00000350676,ENSP00000352516,ENSP00000355759,ENSP00000356448,ENSP00000357283,ENSP00000359321,ENSP00000367787,ENSP00000373905,ENSP00000388648,ENSP00000399888,ENSP00000403701,ENSP00000411532	ARRB2,CHEK1,CORO1A,DNM2,DNMT1,GNL3L,HMGA1,HNRNPA1,HNRNPU,LIG3,LMNA,MTF2,NBN,NPM1,PARP1,PHF8,PLK1,RBM14,SPTBN1,SWAP70,TOP2A,TPR,XRCC1
GO:0010564	regulation of cell cycle process	34	684	6.87e-07	ENSP00000204517,ENSP00000216714,ENSP00000265433,ENSP00000283179,ENSP00000287437,ENSP00000296930,ENSP00000299736,ENSP00000300093,ENSP00000301764,ENSP00000311747,ENSP00000313950,ENSP00000323421,ENSP00000325690,ENSP00000336687,ENSP00000337623,ENSP00000349467,ENSP00000349748,ENSP00000354720,ENSP00000354957,ENSP00000356448,ENSP00000361540,ENSP00000362532,ENSP00000362937,ENSP00000364585,ENSP00000365694…	AKT2,APEX1,AURKB,CALM1,CARM1,CBX3,CDC20,CDK1,CENPV,CHEK1,DDB1,DDX3X,HMGA2,HNRNPU,MYBBP1A,NBN,NPM1,NSMCE2,PLK1,PPP1R10,PTPN6,RBBP7,RBM14,RCC1,RCC2,RNASEH2B,RPRD1B,SFPQ,SMC1A,SMC3,SMC5,SPAST,TFAP4,TPR
GO:0051168	nuclear export	16	161	8.81e-07	ENSP00000261600,ENSP00000298310,ENSP00000307863,ENSP00000326261,ENSP00000337632,ENSP00000341826,ENSP00000346067,ENSP00000346694,ENSP00000356448,ENSP00000379475,ENSP00000382091,ENSP00000386636,ENSP00000420306,ENSP00000421592,ENSP00000436679,ENSP00000470142	ALKBH5,ALYREF,DDX39B,HNRNPA1,HNRNPA2B1,NEMF,NXF1,RPSA,SARNP,SRRM1,SSB,THOC1,THOC5,TPR,U2AF2,UPF1
GO:0006413	translational initiation	15	142	1.13e-06	ENSP00000256383,ENSP00000278572,ENSP00000293831,ENSP00000307889,ENSP00000339095,ENSP00000346067,ENSP00000357555,ENSP00000361076,ENSP00000364119,ENSP00000375730,ENSP00000382840,ENSP00000393241,ENSP00000435777,ENSP00000449328,ENSP00000464813	DDX3X,EIF2S1,EIF2S2,EIF4A1,RPL13,RPL13A,RPL27,RPL7A,RPLP0,RPS13,RPS18,RPS27,RPS3,RPS7,RPSA
GO:0045787	positive regulation of cell cycle	24	376	1.16e-06	ENSP00000204517,ENSP00000216714,ENSP00000261600,ENSP00000283179,ENSP00000287437,ENSP00000296930,ENSP00000299736,ENSP00000313950,ENSP00000325690,ENSP00000340944,ENSP00000349748,ENSP00000354957,ENSP00000356448,ENSP00000364585,ENSP00000365694,ENSP00000370968,ENSP00000378699,ENSP00000379475,ENSP00000382840,ENSP00000388648,ENSP00000402949,ENSP00000420306,ENSP00000437621,ENSP00000480893	APEX1,AURKB,CARM1,CDK1,CENPV,CHEK1,DDX39B,DDX3X,FAM58A,HMGA2,HNRNPU,MYBBP1A,NPM1,NSMCE2,PPP1R10,PTPN11,RCC2,SFPQ,SMC5,SPAST,TFAP4,THOC1,THOC5,TPR
GO:0051129	negative regulation of cellular component organization	32	632	1.18e-06	ENSP00000219150,ENSP00000262887,ENSP00000265433,ENSP00000269321,ENSP00000283179,ENSP00000296930,ENSP00000300093,ENSP00000311747,ENSP00000315630,ENSP00000325690,ENSP00000338573,ENSP00000341826,ENSP00000348461,ENSP00000349259,ENSP00000350676,ENSP00000352516,ENSP00000355759,ENSP00000356448,ENSP00000357283,ENSP00000359321,ENSP00000364585,ENSP00000367787,ENSP00000373905,ENSP00000375730,ENSP00000377015…	ARHGDIA,ARRB2,CARM1,CHEK1,CORO1A,DDX3X,DNM2,DNMT1,GNB2L1,GNL3L,HDAC2,HMGA1,HNRNPA1,HNRNPU,LIG3,LMNA,MTF2,NBN,NPM1,PARP1,PHF8,PICALM,PLK1,RAC1,RBM14,RCC2,RPL13A,SPTBN1,SWAP70,TOP2A,TPR,XRCC1
GO:0050658	RNA transport	17	189	1.24e-06	ENSP00000261600,ENSP00000307863,ENSP00000326261,ENSP00000337632,ENSP00000341826,ENSP00000346067,ENSP00000346694,ENSP00000356448,ENSP00000359506,ENSP00000376309,ENSP00000379475,ENSP00000382091,ENSP00000386636,ENSP00000420306,ENSP00000421592,ENSP00000436679,ENSP00000470142	ALKBH5,ALYREF,DDX39B,FMR1,HNRNPA1,HNRNPA2B1,HNRNPA3,NXF1,RPSA,SARNP,SRRM1,SSB,THOC1,THOC5,TPR,U2AF2,UPF1
GO:0006266	DNA ligation	7	16	1.35e-06	ENSP00000262887,ENSP00000263274,ENSP00000296503,ENSP00000302111,ENSP00000355759,ENSP00000367787,ENSP00000411532	HMGB2,LIG1,LIG3,MGMT,PARP1,TOP2A,XRCC1
GO:0071426	ribonucleoprotein complex export from nucleus	14	124	1.43e-06	ENSP00000261600,ENSP00000307863,ENSP00000326261,ENSP00000337632,ENSP00000346067,ENSP00000346694,ENSP00000356448,ENSP00000379475,ENSP00000382091,ENSP00000386636,ENSP00000420306,ENSP00000421592,ENSP00000436679,ENSP00000470142	ALKBH5,ALYREF,DDX39B,HNRNPA2B1,NXF1,RPSA,SARNP,SRRM1,SSB,THOC1,THOC5,TPR,U2AF2,UPF1
GO:0051028	mRNA transport	15	148	1.76e-06	ENSP00000261600,ENSP00000307863,ENSP00000326261,ENSP00000337632,ENSP00000341826,ENSP00000346694,ENSP00000356448,ENSP00000359506,ENSP00000376309,ENSP00000379475,ENSP00000382091,ENSP00000420306,ENSP00000421592,ENSP00000436679,ENSP00000470142	ALKBH5,ALYREF,DDX39B,FMR1,HNRNPA1,HNRNPA2B1,HNRNPA3,NXF1,SARNP,SRRM1,THOC1,THOC5,TPR,U2AF2,UPF1
GO:0050792	regulation of viral process	16	174	2.23e-06	ENSP00000204517,ENSP00000225792,ENSP00000240185,ENSP00000261531,ENSP00000300026,ENSP00000301764,ENSP00000306565,ENSP00000310275,ENSP00000354720,ENSP00000359506,ENSP00000359531,ENSP00000382840,ENSP00000388001,ENSP00000404121,ENSP00000411532,ENSP00000437621	BANF1,DDB1,DDX3X,DDX5,FMR1,GTF2B,HMGA2,ILF3,ISG20,OAS1,PPIB,SMC3,SNW1,TARDBP,TFAP4,TOP2A
GO:0048511	rhythmic process	19	250	2.32e-06	ENSP00000221419,ENSP00000225792,ENSP00000262367,ENSP00000276079,ENSP00000283179,ENSP00000313199,ENSP00000321584,ENSP00000326031,ENSP00000336687,ENSP00000341779,ENSP00000343966,ENSP00000349748,ENSP00000354522,ENSP00000370968,ENSP00000378769,ENSP00000403701,ENSP00000411532,ENSP00000426909,ENSP00000430432	ARRB2,CBX3,CREBBP,DDX5,GNB2L1,HDAC2,HNRNPD,HNRNPL,HNRNPU,IMPDH2,MYBBP1A,NONO,PPP1CA,PPP1CB,PPP1CC,PSPC1,SFPQ,TOP1,TOP2A
GO:0034655	nucleobase-containing compound catabolic process	24	394	2.47e-06	ENSP00000225792,ENSP00000278572,ENSP00000296503,ENSP00000306565,ENSP00000307889,ENSP00000311677,ENSP00000313199,ENSP00000337623,ENSP00000339095,ENSP00000346067,ENSP00000346762,ENSP00000353741,ENSP00000357555,ENSP00000361076,ENSP00000366396,ENSP00000375730,ENSP00000378669,ENSP00000386636,ENSP00000393241,ENSP00000435777,ENSP00000449328,ENSP00000464813,ENSP00000470142,ENSP00000478754	ALDOA,DDX5,DDX6,ETF1,HMGB2,HNRNPD,ISG20,PPP1R8,RNASEH2B,RPL13,RPL13A,RPL27,RPL7A,RPLP0,RPS13,RPS18,RPS27,RPS3,RPS7,RPSA,SND1,SSB,UPF1,XRN2
GO:0071478	cellular response to radiation	15	153	2.57e-06	ENSP00000256383,ENSP00000262367,ENSP00000296930,ENSP00000301764,ENSP00000302111,ENSP00000313950,ENSP00000355759,ENSP00000359506,ENSP00000373905,ENSP00000375892,ENSP00000376345,ENSP00000383042,ENSP00000388648,ENSP00000410059,ENSP00000473172	AKT2,AURKB,CHEK1,CREBBP,DDB1,DNM2,EEF1D,EIF2S1,FMR1,GRB2,KDM1A,MGMT,NPM1,PARP1,RUVBL2
GO:0044267	cellular protein metabolic process	99	3603	2.71e-06	ENSP00000216639,ENSP00000217182,ENSP00000231004,ENSP00000254730,ENSP00000256383,ENSP00000261308,ENSP00000262367,ENSP00000278572,ENSP00000287239,ENSP00000287437,ENSP00000293831,ENSP00000296411,ENSP00000300026,ENSP00000300093,ENSP00000301764,ENSP00000307705,ENSP00000307889,ENSP00000307940,ENSP00000309474,ENSP00000311747,ENSP00000313950,ENSP00000318297,ENSP00000320566,ENSP00000323065,ENSP00000325690…	ADRM1,AKT2,ARRB2,AURKB,BAZ2A,BTK,C4orf27,CALM1,CARM1,CBFB,CDC20,CDK1,CHEK1,CREBBP,CXXC1,DDB1,DDX3X,EEF1A1,EEF1A2,EEF1B2,EEF1D,EEF1G,EEF2,EEFSEC,EIF2S1,EIF2S2,EIF4A1,ETF1,FAM98B,GADD45GIP1,GNB2L1,GRB2,GTF2B,HDAC2,HIST1H1C,HIST1H1E,HIST1H2BF,HMGA2,ILF3,ING3,ING4,KAT6B,KDM1A,LARS,LMO7,LOX,METAP1,MORF4L2,MYCBP2,NCOA3,NF1,NOSIP,NSD1,NSMCE2,PARP1,PCBP2,PHF8,PLK1,PPIB,PPP1CA,PPP1CB,PPP1CC,PPWD1,PSMD1,PT…
GO:0031123	RNA 3'-end processing	13	112	3.04e-06	ENSP00000261600,ENSP00000266679,ENSP00000307863,ENSP00000315791,ENSP00000326261,ENSP00000337632,ENSP00000345412,ENSP00000346067,ENSP00000358563,ENSP00000379475,ENSP00000386636,ENSP00000420306,ENSP00000421592	ALYREF,CPSF6,CPSF7,CSTF3,DDX39B,DKC1,RPSA,SARNP,SRRM1,SSB,THOC1,THOC5,U2AF2
GO:0000278	mitotic cell cycle	31	628	3.06e-06	ENSP00000216122,ENSP00000216639,ENSP00000254719,ENSP00000263274,ENSP00000265433,ENSP00000300093,ENSP00000310275,ENSP00000313851,ENSP00000313950,ENSP00000323421,ENSP00000325690,ENSP00000340944,ENSP00000349259,ENSP00000349961,ENSP00000350676,ENSP00000353590,ENSP00000354720,ENSP00000356448,ENSP00000357283,ENSP00000358866,ENSP00000361298,ENSP00000361540,ENSP00000362937,ENSP00000373905,ENSP00000378699…	AURKB,BANF1,CARM1,CDC20,CDK1,DNM2,FLNA,HMGA2,KIF2C,LIG1,LMNA,MCM3,MCM5,MYH10,NBN,PDS5B,PHF8,PLK1,PTPN11,PTPN6,RCC1,RPA1,SMC1A,SMC3,SMC4,SPAST,SPTBN1,TOP2A,TOP2B,TPR,VRK1
GO:0015931	nucleobase-containing compound transport	18	230	3.26e-06	ENSP00000261600,ENSP00000307863,ENSP00000326261,ENSP00000337632,ENSP00000341826,ENSP00000346067,ENSP00000346694,ENSP00000356448,ENSP00000359506,ENSP00000376309,ENSP00000379475,ENSP00000382091,ENSP00000385312,ENSP00000386636,ENSP00000420306,ENSP00000421592,ENSP00000436679,ENSP00000470142	ALKBH5,ALYREF,DDX39B,FMR1,HNRNPA1,HNRNPA2B1,HNRNPA3,NXF1,RPSA,SARNP,SLC25A19,SRRM1,SSB,THOC1,THOC5,TPR,U2AF2,UPF1
GO:0000122	negative regulation of transcription by RNA polymerase II	36	809	3.29e-06	ENSP00000225792,ENSP00000228251,ENSP00000250916,ENSP00000261531,ENSP00000262367,ENSP00000283179,ENSP00000296702,ENSP00000300093,ENSP00000307705,ENSP00000313950,ENSP00000329097,ENSP00000339566,ENSP00000340271,ENSP00000344903,ENSP00000345917,ENSP00000346694,ENSP00000349748,ENSP00000351250,ENSP00000352516,ENSP00000355759,ENSP00000356448,ENSP00000359321,ENSP00000368924,ENSP00000369270,ENSP00000369424…	AURKB,CBFB,CNBP,CREBBP,DDX5,DNMT1,ESRRA,HDAC2,HIST1H1C,HIST1H1E,HMGA2,HNRNPA2B1,HNRNPU,KDM1A,KLF16,LYAR,MAFK,MTF2,NFIC,NSD1,PARP1,PHF14,PHF6,PLK1,PPP1R13L,RBBP7,RREB1,SFPQ,SNW1,TAF3,TCERG1,TFAP2A,TPR,TRIM33,UHRF1,YBX3
GO:0006518	peptide metabolic process	27	497	3.37e-06	ENSP00000217182,ENSP00000254730,ENSP00000256383,ENSP00000278572,ENSP00000293831,ENSP00000307889,ENSP00000307940,ENSP00000323065,ENSP00000331901,ENSP00000339063,ENSP00000339095,ENSP00000346067,ENSP00000353741,ENSP00000357555,ENSP00000361076,ENSP00000362576,ENSP00000364119,ENSP00000375730,ENSP00000376056,ENSP00000377954,ENSP00000382840,ENSP00000393241,ENSP00000410059,ENSP00000426909,ENSP00000435777…	DDX3X,EEF1A1,EEF1A2,EEF1B2,EEF1D,EEF1G,EEF2,EEFSEC,EIF2S1,EIF2S2,EIF4A1,ETF1,GADD45GIP1,GNB2L1,LARS,RPL13,RPL13A,RPL27,RPL7A,RPLP0,RPS13,RPS18,RPS27,RPS3,RPS7,RPSA,YARS
GO:1902373	negative regulation of mRNA catabolic process	9	44	3.79e-06	ENSP00000228251,ENSP00000240185,ENSP00000283179,ENSP00000313199,ENSP00000316042,ENSP00000331678,ENSP00000358635,ENSP00000359506,ENSP00000385269	ELAVL1,FMR1,HNRNPA0,HNRNPD,HNRNPU,PKP3,SYNCRIP,TARDBP,YBX3
GO:0051054	positive regulation of DNA metabolic process	17	209	4.28e-06	ENSP00000262887,ENSP00000265433,ENSP00000278572,ENSP00000302111,ENSP00000313199,ENSP00000313950,ENSP00000323511,ENSP00000341826,ENSP00000346694,ENSP00000348461,ENSP00000352516,ENSP00000355759,ENSP00000358563,ENSP00000365694,ENSP00000378699,ENSP00000379475,ENSP00000403701	ARRB2,AURKB,CDK1,DDX39B,DKC1,DNMT1,HNRNPA1,HNRNPA2B1,HNRNPD,MGMT,NBN,PARP1,PNKP,PPP1R10,RAC1,RPS3,XRCC1
GO:0010501	RNA secondary structure unwinding	9	45	4.43e-06	ENSP00000225792,ENSP00000293831,ENSP00000346120,ENSP00000370745,ENSP00000379475,ENSP00000380033,ENSP00000382840,ENSP00000478754,ENSP00000479504	DDX1,DDX17,DDX21,DDX39B,DDX3X,DDX5,DDX52,DDX6,EIF4A1
GO:0051246	regulation of protein metabolic process	79	2668	4.47e-06	ENSP00000204517,ENSP00000216181,ENSP00000217182,ENSP00000220325,ENSP00000221419,ENSP00000228251,ENSP00000240185,ENSP00000250113,ENSP00000254730,ENSP00000256383,ENSP00000261531,ENSP00000262887,ENSP00000265433,ENSP00000278572,ENSP00000287437,ENSP00000296411,ENSP00000296930,ENSP00000300093,ENSP00000301764,ENSP00000302111,ENSP00000302886,ENSP00000307183,ENSP00000307863,ENSP00000307940,ENSP00000309474…	ADRM1,AKT2,ARRB2,C4orf27,CALM1,CDC20,CDK1,CELF1,CHEK1,DDB1,DDX1,DDX39B,DDX3X,DDX6,DNMT1,EEF1A1,EEF1A2,EEF2,EEFSEC,EHD4,EIF2S1,ELAVL1,ETF1,FAM58A,FLNA,FMR1,FXR2,GNB2L1,GNL3L,GRB2,HDAC2,HNRNPD,HNRNPL,ILF3,ING2,KDM1A,METAP1,MGMT,MTF2,MYH9,NBN,NCL,NF1,NPM1,NSD1,NSMCE2,PA2G4,PICALM,PLK1,PNKP,PPP1CA,PPP1R10,PPP1R8,PSMD1,PTPN11,PTPN6,PURA,RAC1,RNF20,RPL13A,RPS3,RPS7,RUVBL2,SARNP,SHMT2,SNW1,STK24,SWAP70,…
GO:2001251	negative regulation of chromosome organization	13	117	4.61e-06	ENSP00000262887,ENSP00000265433,ENSP00000283179,ENSP00000300093,ENSP00000338573,ENSP00000341826,ENSP00000350676,ENSP00000352516,ENSP00000355759,ENSP00000356448,ENSP00000359321,ENSP00000399888,ENSP00000411532	DNMT1,GNL3L,HMGA1,HNRNPA1,HNRNPU,MTF2,NBN,PARP1,PHF8,PLK1,TOP2A,TPR,XRCC1
GO:1902275	regulation of chromatin organization	15	162	4.78e-06	ENSP00000261531,ENSP00000283179,ENSP00000307183,ENSP00000350676,ENSP00000352516,ENSP00000356448,ENSP00000359321,ENSP00000359506,ENSP00000373772,ENSP00000383042,ENSP00000388648,ENSP00000395929,ENSP00000399888,ENSP00000473172,ENSP00000479617	CHEK1,DNMT1,FMR1,HMGA1,HNRNPU,ING2,KDM1A,MTF2,NSD1,PHF8,RNF20,RUVBL2,SNW1,TPR,UHRF1
GO:0000184	nuclear-transcribed mRNA catabolic process, nonsense-mediated decay	13	118	4.99e-06	ENSP00000278572,ENSP00000307889,ENSP00000339095,ENSP00000346067,ENSP00000353741,ENSP00000357555,ENSP00000361076,ENSP00000375730,ENSP00000393241,ENSP00000435777,ENSP00000449328,ENSP00000464813,ENSP00000470142	ETF1,RPL13,RPL13A,RPL27,RPL7A,RPLP0,RPS13,RPS18,RPS27,RPS3,RPS7,RPSA,UPF1
GO:2001020	regulation of response to DNA damage stimulus	16	188	5.4e-06	ENSP00000225792,ENSP00000261600,ENSP00000262887,ENSP00000278572,ENSP00000302111,ENSP00000307183,ENSP00000337623,ENSP00000355759,ENSP00000359506,ENSP00000365694,ENSP00000379475,ENSP00000380414,ENSP00000383042,ENSP00000388648,ENSP00000420306,ENSP00000437621	CHEK1,DDX39B,DDX5,DEK,FMR1,HMGA2,ING2,KDM1A,MGMT,PARP1,PPP1R10,RNASEH2B,RPS3,THOC1,THOC5,XRCC1
GO:0000956	nuclear-transcribed mRNA catabolic process	16	191	6.56e-06	ENSP00000225792,ENSP00000278572,ENSP00000307889,ENSP00000339095,ENSP00000346067,ENSP00000353741,ENSP00000357555,ENSP00000361076,ENSP00000375730,ENSP00000386636,ENSP00000393241,ENSP00000435777,ENSP00000449328,ENSP00000464813,ENSP00000470142,ENSP00000478754	DDX5,DDX6,ETF1,RPL13,RPL13A,RPL27,RPL7A,RPLP0,RPS13,RPS18,RPS27,RPS3,RPS7,RPSA,SSB,UPF1
GO:0034728	nucleosome organization	15	167	6.72e-06	ENSP00000216297,ENSP00000283131,ENSP00000287239,ENSP00000296503,ENSP00000296930,ENSP00000301280,ENSP00000307705,ENSP00000312625,ENSP00000315700,ENSP00000318297,ENSP00000339566,ENSP00000348924,ENSP00000369424,ENSP00000399888,ENSP00000477538	CHAF1A,CHAF1B,HIST1H1C,HIST1H1E,HIST1H2BF,HMGA1,HMGB2,HP1BP3,KAT6B,NAP1L1,NPM1,RBBP7,RUVBL1,SMARCA5,SUPT16H
GO:0010638	positive regulation of organelle organization	28	552	7e-06	ENSP00000261531,ENSP00000265433,ENSP00000278572,ENSP00000283179,ENSP00000287437,ENSP00000307183,ENSP00000313199,ENSP00000313950,ENSP00000315630,ENSP00000323511,ENSP00000341826,ENSP00000346694,ENSP00000348461,ENSP00000349748,ENSP00000352516,ENSP00000354957,ENSP00000356448,ENSP00000358563,ENSP00000358866,ENSP00000359321,ENSP00000359506,ENSP00000361930,ENSP00000365694,ENSP00000373772,ENSP00000375892…	AKT2,AURKB,DKC1,DNMT1,FLNA,FMR1,GRB2,HNRNPA1,HNRNPA2B1,HNRNPD,HNRNPU,ING2,KDM1A,MTF2,NBN,NSMCE2,PNKP,PPP1R10,RAC1,RNF20,RPS3,RUVBL2,SFPQ,SMC5,SNW1,SWAP70,TPR,YWHAB
GO:0045069	regulation of viral genome replication	11	85	9.71e-06	ENSP00000225792,ENSP00000300026,ENSP00000301764,ENSP00000306565,ENSP00000310275,ENSP00000359506,ENSP00000382840,ENSP00000388001,ENSP00000404121,ENSP00000411532,ENSP00000437621	BANF1,DDB1,DDX3X,DDX5,FMR1,HMGA2,ILF3,ISG20,OAS1,PPIB,TOP2A
GO:1903047	mitotic cell cycle process	28	564	1.04e-05	ENSP00000216122,ENSP00000216639,ENSP00000254719,ENSP00000263274,ENSP00000265433,ENSP00000300093,ENSP00000310275,ENSP00000313851,ENSP00000313950,ENSP00000323421,ENSP00000325690,ENSP00000349259,ENSP00000349961,ENSP00000350676,ENSP00000353590,ENSP00000356448,ENSP00000357283,ENSP00000358866,ENSP00000361298,ENSP00000361540,ENSP00000362937,ENSP00000373905,ENSP00000378699,ENSP00000396704,ENSP00000411532…	AURKB,BANF1,CARM1,CDC20,CDK1,DNM2,FLNA,HMGA2,KIF2C,LIG1,LMNA,MCM3,MCM5,MYH10,NBN,PDS5B,PHF8,PLK1,RCC1,RPA1,SMC1A,SMC4,SPAST,SPTBN1,TOP2A,TOP2B,TPR,VRK1
GO:0051130	positive regulation of cellular component organization	43	1128	1.06e-05	ENSP00000254719,ENSP00000261531,ENSP00000265073,ENSP00000265433,ENSP00000269321,ENSP00000278572,ENSP00000280333,ENSP00000283179,ENSP00000287437,ENSP00000301764,ENSP00000307183,ENSP00000313199,ENSP00000313950,ENSP00000315630,ENSP00000323511,ENSP00000341826,ENSP00000345917,ENSP00000346694,ENSP00000348461,ENSP00000349748,ENSP00000352516,ENSP00000354957,ENSP00000355759,ENSP00000356448,ENSP00000358262…	AKT2,ARHGDIA,ARRB2,AURKB,CDC20,CHD1L,DDB1,DKC1,DNM2,DNMT1,DOCK1,FLNA,FMR1,GNB2L1,GRB2,GTF2B,HNRNPA1,HNRNPA2B1,HNRNPD,HNRNPU,ING2,KDM1A,LYAR,MTF2,NBN,NSMCE2,PARP1,PICALM,PNKP,PPP1R10,RAC1,RNF20,RPA1,RPS3,RREB1,RUVBL2,SFPQ,SMC5,SNW1,SUB1,SWAP70,TPR,YWHAB
GO:0006406	mRNA export from nucleus	12	107	1.16e-05	ENSP00000261600,ENSP00000307863,ENSP00000326261,ENSP00000337632,ENSP00000346694,ENSP00000356448,ENSP00000379475,ENSP00000382091,ENSP00000420306,ENSP00000421592,ENSP00000436679,ENSP00000470142	ALKBH5,ALYREF,DDX39B,HNRNPA2B1,NXF1,SARNP,SRRM1,THOC1,THOC5,TPR,U2AF2,UPF1
GO:0071214	cellular response to abiotic stimulus	19	282	1.16e-05	ENSP00000228251,ENSP00000256383,ENSP00000262367,ENSP00000296930,ENSP00000301764,ENSP00000302111,ENSP00000313950,ENSP00000340944,ENSP00000348461,ENSP00000355759,ENSP00000359506,ENSP00000373905,ENSP00000375892,ENSP00000376345,ENSP00000382840,ENSP00000383042,ENSP00000388648,ENSP00000410059,ENSP00000473172	AKT2,AURKB,CHEK1,CREBBP,DDB1,DDX3X,DNM2,EEF1D,EIF2S1,FMR1,GRB2,KDM1A,MGMT,NPM1,PARP1,PTPN11,RAC1,RUVBL2,YBX3
GO:0051053	negative regulation of DNA metabolic process	13	134	1.74e-05	ENSP00000261600,ENSP00000262887,ENSP00000265433,ENSP00000278572,ENSP00000283179,ENSP00000323421,ENSP00000338573,ENSP00000341826,ENSP00000354720,ENSP00000355759,ENSP00000367787,ENSP00000368565,ENSP00000437621	DNAJC2,GNL3L,HMGA2,HNRNPA1,HNRNPU,LIG3,NBN,PARP1,RPS3,SMC1A,SMC3,THOC1,XRCC1
GO:0032268	regulation of cellular protein metabolic process	73	2486	1.85e-05	ENSP00000204517,ENSP00000216181,ENSP00000220325,ENSP00000221419,ENSP00000228251,ENSP00000240185,ENSP00000250113,ENSP00000254730,ENSP00000256383,ENSP00000261531,ENSP00000262887,ENSP00000265433,ENSP00000278572,ENSP00000287437,ENSP00000296411,ENSP00000296930,ENSP00000300093,ENSP00000302886,ENSP00000307183,ENSP00000307863,ENSP00000307940,ENSP00000311677,ENSP00000313199,ENSP00000315630,ENSP00000318195…	ADRM1,AKT2,ARRB2,C4orf27,CALM1,CDC20,CDK1,CELF1,CHEK1,DDX1,DDX39B,DDX3X,DDX6,DNMT1,EEF2,EEFSEC,EHD4,EIF2S1,ELAVL1,ETF1,FAM58A,FMR1,FXR2,GNB2L1,GNL3L,GRB2,HDAC2,HNRNPD,HNRNPL,ILF3,ING2,KDM1A,METAP1,MTF2,MYH9,NBN,NCL,NF1,NPM1,NSD1,NSMCE2,PA2G4,PICALM,PLK1,PNKP,PPP1CA,PPP1R10,PPP1R8,PTPN11,PTPN6,PURA,RAC1,RNF20,RPL13A,RPS3,RPS7,RUVBL2,SARNP,SHMT2,SNW1,STK24,SWAP70,SYNCRIP,TARDBP,TFAP4,TPR,U2AF2,UHRF…
GO:0006614	SRP-dependent cotranslational protein targeting to membrane	11	92	1.86e-05	ENSP00000278572,ENSP00000307889,ENSP00000339095,ENSP00000346067,ENSP00000357555,ENSP00000361076,ENSP00000375730,ENSP00000393241,ENSP00000435777,ENSP00000449328,ENSP00000464813	RPL13,RPL13A,RPL27,RPL7A,RPLP0,RPS13,RPS18,RPS27,RPS3,RPS7,RPSA
GO:0044265	cellular macromolecule catabolic process	35	842	1.97e-05	ENSP00000225792,ENSP00000278572,ENSP00000296503,ENSP00000300093,ENSP00000301764,ENSP00000306565,ENSP00000307889,ENSP00000309474,ENSP00000311677,ENSP00000313199,ENSP00000313950,ENSP00000337623,ENSP00000338413,ENSP00000339095,ENSP00000346067,ENSP00000346762,ENSP00000352438,ENSP00000353741,ENSP00000357555,ENSP00000361076,ENSP00000361540,ENSP00000366396,ENSP00000373772,ENSP00000375730,ENSP00000378699…	ADRM1,ARRB2,AURKB,CDC20,CDK1,DDB1,DDX5,DDX6,ETF1,HMGB2,HNRNPD,ISG20,PCBP2,PLK1,PPP1R8,PSMD1,RNASEH2B,RNF20,RPL13,RPL13A,RPL27,RPL7A,RPLP0,RPS13,RPS18,RPS27,RPS3,RPS7,RPSA,SND1,SSB,UBA1,UHRF1,UPF1,XRN2
GO:0006261	DNA-dependent DNA replication	12	114	2.05e-05	ENSP00000216122,ENSP00000254719,ENSP00000261600,ENSP00000263274,ENSP00000323511,ENSP00000332706,ENSP00000355759,ENSP00000399888,ENSP00000421592,ENSP00000470142,ENSP00000480186,ENSP00000480987	ALYREF,HMGA1,LIG1,MCM3,MCM5,PARP1,PNKP,POLD2,PURA,RPA1,THOC1,UPF1
GO:0006334	nucleosome assembly	13	137	2.14e-05	ENSP00000283131,ENSP00000287239,ENSP00000296503,ENSP00000296930,ENSP00000301280,ENSP00000307705,ENSP00000312625,ENSP00000315700,ENSP00000318297,ENSP00000339566,ENSP00000348924,ENSP00000369424,ENSP00000477538	CHAF1A,CHAF1B,HIST1H1C,HIST1H1E,HIST1H2BF,HMGB2,HP1BP3,KAT6B,NAP1L1,NPM1,RBBP7,RUVBL1,SMARCA5
GO:0051702	interaction with symbiont	10	75	2.33e-05	ENSP00000204517,ENSP00000240185,ENSP00000261531,ENSP00000300026,ENSP00000301764,ENSP00000349467,ENSP00000354720,ENSP00000359506,ENSP00000359531,ENSP00000437621	CALM1,DDB1,FMR1,GTF2B,HMGA2,PPIB,SMC3,SNW1,TARDBP,TFAP4
GO:0051641	cellular localization	66	2180	2.49e-05	ENSP00000070846,ENSP00000216181,ENSP00000219150,ENSP00000220325,ENSP00000254719,ENSP00000261600,ENSP00000278572,ENSP00000283179,ENSP00000292475,ENSP00000296930,ENSP00000298310,ENSP00000300093,ENSP00000307863,ENSP00000307889,ENSP00000310275,ENSP00000313950,ENSP00000325690,ENSP00000326261,ENSP00000331678,ENSP00000337632,ENSP00000339095,ENSP00000340271,ENSP00000341044,ENSP00000341826,ENSP00000346067…	ACACB,AKT2,ALKBH5,ALYREF,ANP32A,ATP5J2,AURKB,BANF1,BTK,CARM1,CDK1,CORO1A,DDX1,DDX39B,DDX3X,DNM2,EHD4,FLNA,HMGA1,HNRNPA1,HNRNPA2B1,HNRNPU,HTATIP2,KIF2C,LARS,LMNA,MYH10,MYH9,NEMF,NF1,NPM1,NXF1,PICALM,PKP2,PKP3,PLK1,PPP1R10,PSIP1,RAC1,RCC2,RPA1,RPL13,RPL13A,RPL27,RPL7A,RPLP0,RPS13,RPS18,RPS27,RPS3,RPS7,RPSA,RUVBL2,SARNP,SPAST,SPTBN1,SRRM1,SSB,TAF3,THOC1,THOC5,TOMM34,TPR,U2AF2,UPF1,YWHAB
GO:0000381	regulation of alternative mRNA splicing, via spliceosome	8	42	2.55e-05	ENSP00000221419,ENSP00000225792,ENSP00000283179,ENSP00000341826,ENSP00000359506,ENSP00000359645,ENSP00000364639,ENSP00000380033	DDX17,DDX5,FMR1,HNRNPA1,HNRNPL,HNRNPU,RBM7,RBMX
GO:0043489	RNA stabilization	8	42	2.55e-05	ENSP00000228251,ENSP00000240185,ENSP00000283179,ENSP00000313199,ENSP00000316042,ENSP00000358563,ENSP00000358635,ENSP00000385269	DKC1,ELAVL1,HNRNPA0,HNRNPD,HNRNPU,SYNCRIP,TARDBP,YBX3
GO:0071482	cellular response to light stimulus	11	97	2.87e-05	ENSP00000256383,ENSP00000262367,ENSP00000296930,ENSP00000301764,ENSP00000313950,ENSP00000355759,ENSP00000359506,ENSP00000375892,ENSP00000383042,ENSP00000388648,ENSP00000473172	AKT2,AURKB,CHEK1,CREBBP,DDB1,EIF2S1,FMR1,KDM1A,NPM1,PARP1,RUVBL2
GO:0046907	intracellular transport	48	1390	3.01e-05	ENSP00000219150,ENSP00000220325,ENSP00000261600,ENSP00000278572,ENSP00000292475,ENSP00000296930,ENSP00000298310,ENSP00000307863,ENSP00000307889,ENSP00000310275,ENSP00000326261,ENSP00000337632,ENSP00000339095,ENSP00000341044,ENSP00000341826,ENSP00000346067,ENSP00000346694,ENSP00000349259,ENSP00000353590,ENSP00000356448,ENSP00000357283,ENSP00000357555,ENSP00000361076,ENSP00000361900,ENSP00000361930…	ACACB,AKT2,ALKBH5,ALYREF,ANP32A,ATP5J2,BANF1,BTK,CORO1A,DDX39B,DNM2,EHD4,HMGA1,HNRNPA1,HNRNPA2B1,HTATIP2,LARS,LMNA,MYH10,NEMF,NPM1,NXF1,PICALM,PPP1R10,PSIP1,RPL13,RPL13A,RPL27,RPL7A,RPLP0,RPS13,RPS18,RPS27,RPS3,RPS7,RPSA,SARNP,SPAST,SPTBN1,SRRM1,SSB,THOC1,THOC5,TOMM34,TPR,U2AF2,UPF1,YWHAB
GO:0031124	mRNA 3'-end processing	10	78	3.11e-05	ENSP00000261600,ENSP00000266679,ENSP00000307863,ENSP00000315791,ENSP00000326261,ENSP00000337632,ENSP00000345412,ENSP00000379475,ENSP00000420306,ENSP00000421592	ALYREF,CPSF6,CPSF7,CSTF3,DDX39B,SARNP,SRRM1,THOC1,THOC5,U2AF2
GO:0034644	cellular response to UV	10	78	3.11e-05	ENSP00000256383,ENSP00000262367,ENSP00000296930,ENSP00000301764,ENSP00000313950,ENSP00000355759,ENSP00000359506,ENSP00000383042,ENSP00000388648,ENSP00000473172	AURKB,CHEK1,CREBBP,DDB1,EIF2S1,FMR1,KDM1A,NPM1,PARP1,RUVBL2
GO:0042981	regulation of apoptotic process	50	1501	4.72e-05	ENSP00000204517,ENSP00000216714,ENSP00000217182,ENSP00000219150,ENSP00000228251,ENSP00000240185,ENSP00000256383,ENSP00000262367,ENSP00000269321,ENSP00000276079,ENSP00000278572,ENSP00000296503,ENSP00000296930,ENSP00000300093,ENSP00000301764,ENSP00000302111,ENSP00000302886,ENSP00000307183,ENSP00000313950,ENSP00000320566,ENSP00000325958,ENSP00000326031,ENSP00000339095,ENSP00000349748,ENSP00000351015…	AKT2,ANP32A,APEX1,API5,ARHGDIA,ARRB2,AURKB,BTK,CDK1,CORO1A,CREBBP,DDB1,DDX3X,DNM2,DNMT1,EEF1A2,EIF2S1,FLNA,GNB2L1,HDAC2,HMGA2,HMGB2,HTATIP2,ING2,ING3,ING4,KDM1A,LMNA,MGMT,MYBBP1A,NF1,NONO,NPM1,PA2G4,PARP1,PLK1,PPP1CA,PPP1R10,PTPMT1,RPS3,RPS7,SERBP1,SFPQ,STK24,TARDBP,TFAP2A,TFAP4,TOP2A,YBX3,YWHAB
GO:0043412	macromolecule modification	86	3197	5e-05	ENSP00000199320,ENSP00000216639,ENSP00000216714,ENSP00000231004,ENSP00000256383,ENSP00000260129,ENSP00000261308,ENSP00000262367,ENSP00000287239,ENSP00000287437,ENSP00000296411,ENSP00000300026,ENSP00000300093,ENSP00000301764,ENSP00000302111,ENSP00000307181,ENSP00000307705,ENSP00000309126,ENSP00000309474,ENSP00000311747,ENSP00000313950,ENSP00000318297,ENSP00000320566,ENSP00000325690,ENSP00000325958…	ADRM1,AKT2,ALKBH5,APEX1,ARRB2,AURKB,BAZ2A,BTK,C4orf27,CALM1,CARM1,CBFB,CDC20,CDK1,CHEK1,CREBBP,CXXC1,DDB1,DIMT1,DKC1,DNMT1,EIF2S1,ETF1,FAM103A1,FAM98B,GNB2L1,GRB2,GTF2B,HDAC2,HELLS,HIST1H1C,HIST1H1E,HIST1H2BF,HMGA2,ILF3,ING3,ING4,KAT6B,KDM1A,LMO7,LOX,METAP1,MGMT,MORF4L2,MYCBP2,NCOA3,NF1,NOSIP,NSD1,NSMCE2,NSUN5,PARP1,PHF8,PLK1,PPIB,PPP1CA,PPP1CB,PPP1CC,PPWD1,PSMD1,PTPMT1,PTPN11,PTPN6,RAC1,RBBP7,RB…
GO:0043603	cellular amide metabolic process	31	732	5.5e-05	ENSP00000217182,ENSP00000254730,ENSP00000256383,ENSP00000278572,ENSP00000293831,ENSP00000307241,ENSP00000307889,ENSP00000307940,ENSP00000323065,ENSP00000331901,ENSP00000333667,ENSP00000339063,ENSP00000339095,ENSP00000341044,ENSP00000346067,ENSP00000353741,ENSP00000357555,ENSP00000361076,ENSP00000362576,ENSP00000364119,ENSP00000369134,ENSP00000375730,ENSP00000376056,ENSP00000377954,ENSP00000382840…	ACACB,DDX3X,EEF1A1,EEF1A2,EEF1B2,EEF1D,EEF1G,EEF2,EEFSEC,EIF2S1,EIF2S2,EIF4A1,ETF1,GADD45GIP1,GNB2L1,LARS,PDHA1,PDHB,RPL13,RPL13A,RPL27,RPL7A,RPLP0,RPS13,RPS18,RPS27,RPS3,RPS7,RPSA,SHMT2,YARS
GO:2000278	regulation of DNA biosynthetic process	11	108	7.1e-05	ENSP00000283179,ENSP00000313199,ENSP00000313950,ENSP00000323511,ENSP00000338573,ENSP00000341826,ENSP00000346694,ENSP00000358563,ENSP00000368565,ENSP00000379475,ENSP00000403701	ARRB2,AURKB,DDX39B,DKC1,DNAJC2,GNL3L,HNRNPA1,HNRNPA2B1,HNRNPD,HNRNPU,PNKP
GO:0000724	double-strand break repair via homologous recombination	10	88	8e-05	ENSP00000254719,ENSP00000262887,ENSP00000265433,ENSP00000287437,ENSP00000336606,ENSP00000349748,ENSP00000354957,ENSP00000355759,ENSP00000367787,ENSP00000416739	LIG3,NBN,NSMCE2,PARP1,RAD54B,RECQL,RPA1,SFPQ,SMC5,XRCC1
GO:0032206	positive regulation of telomere maintenance	8	51	8.64e-05	ENSP00000265433,ENSP00000313199,ENSP00000313950,ENSP00000323511,ENSP00000341826,ENSP00000346694,ENSP00000358563,ENSP00000365694	AURKB,DKC1,HNRNPA1,HNRNPA2B1,HNRNPD,NBN,PNKP,PPP1R10
GO:0045815	positive regulation of gene expression, epigenetic	8	51	8.64e-05	ENSP00000283131,ENSP00000346120,ENSP00000350676,ENSP00000367029,ENSP00000370968,ENSP00000380414,ENSP00000388648,ENSP00000399888	CHEK1,DDX21,DEK,HMGA1,MYBBP1A,PHF8,POLR1E,SMARCA5
GO:0034613	cellular protein localization	46	1367	9.27e-05	ENSP00000070846,ENSP00000254719,ENSP00000261600,ENSP00000278572,ENSP00000283179,ENSP00000296930,ENSP00000300093,ENSP00000307863,ENSP00000307889,ENSP00000313950,ENSP00000325690,ENSP00000326261,ENSP00000331678,ENSP00000337632,ENSP00000339095,ENSP00000340271,ENSP00000346067,ENSP00000346694,ENSP00000349259,ENSP00000356448,ENSP00000357283,ENSP00000357555,ENSP00000358866,ENSP00000361076,ENSP00000361900…	AKT2,ALKBH5,ALYREF,AURKB,CARM1,CDK1,DDX1,DDX39B,DDX3X,FLNA,HNRNPA2B1,HNRNPU,LARS,LMNA,NPM1,NXF1,PKP2,PKP3,PLK1,PPP1R10,RCC2,RPA1,RPL13,RPL13A,RPL27,RPL7A,RPLP0,RPS13,RPS18,RPS27,RPS3,RPS7,RPSA,RUVBL2,SARNP,SPTBN1,SRRM1,SSB,TAF3,THOC1,THOC5,TOMM34,TPR,U2AF2,UPF1,YWHAB
GO:1903900	regulation of viral life cycle	12	135	9.3e-05	ENSP00000225792,ENSP00000300026,ENSP00000301764,ENSP00000306565,ENSP00000310275,ENSP00000354720,ENSP00000359506,ENSP00000382840,ENSP00000388001,ENSP00000404121,ENSP00000411532,ENSP00000437621	BANF1,DDB1,DDX3X,DDX5,FMR1,HMGA2,ILF3,ISG20,OAS1,PPIB,SMC3,TOP2A
GO:0007346	regulation of mitotic cell cycle	27	608	0.0001	ENSP00000204517,ENSP00000216714,ENSP00000265433,ENSP00000283179,ENSP00000287437,ENSP00000300093,ENSP00000301764,ENSP00000313950,ENSP00000323065,ENSP00000323421,ENSP00000325690,ENSP00000337623,ENSP00000340944,ENSP00000354720,ENSP00000354957,ENSP00000356448,ENSP00000362937,ENSP00000364585,ENSP00000365694,ENSP00000365730,ENSP00000378699,ENSP00000382840,ENSP00000388648,ENSP00000391592,ENSP00000396704…	APEX1,AURKB,CARM1,CDK1,CHEK1,DDB1,DDX3X,GADD45GIP1,HMGA2,HNRNPU,NBN,NSMCE2,PLK1,PPP1R10,PTPN11,PTPN6,RCC1,RCC2,RNASEH2B,SMC1A,SMC3,SMC5,STK24,TFAP4,TOP2A,TOP2B,TPR
GO:0010941	regulation of cell death	52	1638	0.0001	ENSP00000204517,ENSP00000216714,ENSP00000217182,ENSP00000219150,ENSP00000228251,ENSP00000240185,ENSP00000256383,ENSP00000262367,ENSP00000269321,ENSP00000276079,ENSP00000278572,ENSP00000296503,ENSP00000296930,ENSP00000300093,ENSP00000301764,ENSP00000302111,ENSP00000302886,ENSP00000307183,ENSP00000313950,ENSP00000320566,ENSP00000325958,ENSP00000326031,ENSP00000339095,ENSP00000349748,ENSP00000351015…	AKT2,ANP32A,APEX1,API5,ARHGDIA,ARRB2,AURKB,BTK,CDK1,CORO1A,CREBBP,DDB1,DDX3X,DNM2,DNMT1,EEF1A2,EEF1D,EIF2S1,FLNA,GNB2L1,HDAC2,HMGA2,HMGB2,HTATIP2,ING2,ING3,ING4,KDM1A,LMNA,MGMT,MYBBP1A,NF1,NONO,NPM1,PA2G4,PARP1,PICALM,PLK1,PPP1CA,PPP1R10,PTPMT1,RPS3,RPS7,SERBP1,SFPQ,STK24,TARDBP,TFAP2A,TFAP4,TOP2A,YBX3,YWHAB
GO:0051851	modification by host of symbiont morphology or physiology	9	71	0.0001	ENSP00000204517,ENSP00000240185,ENSP00000261531,ENSP00000300026,ENSP00000349467,ENSP00000354720,ENSP00000359506,ENSP00000359531,ENSP00000437621	CALM1,FMR1,GTF2B,HMGA2,PPIB,SMC3,SNW1,TARDBP,TFAP4
GO:0033365	protein localization to organelle	28	649	0.00011	ENSP00000254719,ENSP00000278572,ENSP00000283179,ENSP00000300093,ENSP00000307889,ENSP00000313950,ENSP00000325690,ENSP00000339095,ENSP00000340271,ENSP00000346067,ENSP00000356448,ENSP00000357283,ENSP00000357555,ENSP00000361076,ENSP00000361900,ENSP00000364585,ENSP00000365694,ENSP00000370745,ENSP00000375730,ENSP00000377954,ENSP00000378699,ENSP00000382840,ENSP00000386636,ENSP00000393241,ENSP00000435777…	AURKB,CARM1,CDK1,DDX1,DDX3X,HNRNPU,LARS,LMNA,PLK1,PPP1R10,RCC2,RPA1,RPL13,RPL13A,RPL27,RPL7A,RPLP0,RPS13,RPS18,RPS27,RPS3,RPS7,RPSA,RUVBL2,SSB,TAF3,TOMM34,TPR
GO:0048255	mRNA stabilization	7	37	0.00011	ENSP00000228251,ENSP00000240185,ENSP00000283179,ENSP00000313199,ENSP00000316042,ENSP00000358635,ENSP00000385269	ELAVL1,HNRNPA0,HNRNPD,HNRNPU,SYNCRIP,TARDBP,YBX3
GO:0042769	DNA damage response, detection of DNA damage	7	38	0.00013	ENSP00000254719,ENSP00000278572,ENSP00000301764,ENSP00000323511,ENSP00000355759,ENSP00000437621,ENSP00000480186	DDB1,HMGA2,PARP1,PNKP,POLD2,RPA1,RPS3
GO:2001021	negative regulation of response to DNA damage stimulus	9	74	0.00014	ENSP00000261600,ENSP00000262887,ENSP00000278572,ENSP00000307183,ENSP00000365694,ENSP00000379475,ENSP00000383042,ENSP00000420306,ENSP00000437621	DDX39B,HMGA2,ING2,KDM1A,PPP1R10,RPS3,THOC1,THOC5,XRCC1
GO:0031503	protein-containing complex localization	15	223	0.00015	ENSP00000261600,ENSP00000307863,ENSP00000326261,ENSP00000337632,ENSP00000346067,ENSP00000346694,ENSP00000356448,ENSP00000364585,ENSP00000379475,ENSP00000382091,ENSP00000386636,ENSP00000420306,ENSP00000421592,ENSP00000436679,ENSP00000470142	ALKBH5,ALYREF,DDX39B,HNRNPA2B1,NXF1,RCC2,RPSA,SARNP,SRRM1,SSB,THOC1,THOC5,TPR,U2AF2,UPF1
GO:0032269	negative regulation of cellular protein metabolic process	37	1014	0.00015	ENSP00000204517,ENSP00000240185,ENSP00000250113,ENSP00000256383,ENSP00000262887,ENSP00000278572,ENSP00000296930,ENSP00000300093,ENSP00000307863,ENSP00000311677,ENSP00000313199,ENSP00000315630,ENSP00000318195,ENSP00000323511,ENSP00000332706,ENSP00000338573,ENSP00000339095,ENSP00000349467,ENSP00000351015,ENSP00000352516,ENSP00000356448,ENSP00000358635,ENSP00000359321,ENSP00000359506,ENSP00000361930…	ARRB2,CALM1,CELF1,DDX3X,DNMT1,EIF2S1,FMR1,FXR2,GNB2L1,GNL3L,HDAC2,HNRNPD,ILF3,MTF2,NCL,NF1,NPM1,PICALM,PLK1,PNKP,PPP1R10,PPP1R8,PTPN6,PURA,RPL13A,RPS3,RPS7,SWAP70,SYNCRIP,TARDBP,TFAP4,TPR,U2AF2,UPF1,VRK3,XRCC1,YWHAB
GO:0051649	establishment of localization in cell	51	1616	0.00015	ENSP00000216181,ENSP00000219150,ENSP00000220325,ENSP00000261600,ENSP00000278572,ENSP00000292475,ENSP00000296930,ENSP00000298310,ENSP00000307863,ENSP00000307889,ENSP00000310275,ENSP00000326261,ENSP00000337632,ENSP00000339095,ENSP00000341044,ENSP00000341826,ENSP00000346067,ENSP00000346694,ENSP00000349259,ENSP00000351015,ENSP00000353590,ENSP00000356448,ENSP00000357283,ENSP00000357555,ENSP00000361076…	ACACB,AKT2,ALKBH5,ALYREF,ANP32A,ATP5J2,BANF1,BTK,CORO1A,DDX39B,DNM2,EHD4,HMGA1,HNRNPA1,HNRNPA2B1,HTATIP2,KIF2C,LARS,LMNA,MYH10,MYH9,NEMF,NF1,NPM1,NXF1,PICALM,PPP1R10,PSIP1,RPL13,RPL13A,RPL27,RPL7A,RPLP0,RPS13,RPS18,RPS27,RPS3,RPS7,RPSA,SARNP,SPAST,SPTBN1,SRRM1,SSB,THOC1,THOC5,TOMM34,TPR,U2AF2,UPF1,YWHAB
GO:0006284	base-excision repair	7	40	0.00017	ENSP00000216714,ENSP00000254719,ENSP00000262887,ENSP00000263274,ENSP00000367787,ENSP00000399888,ENSP00000437621	APEX1,HMGA1,HMGA2,LIG1,LIG3,RPA1,XRCC1
GO:0043414	macromolecule methylation	15	229	0.0002	ENSP00000199320,ENSP00000260129,ENSP00000302111,ENSP00000307181,ENSP00000307705,ENSP00000309126,ENSP00000325690,ENSP00000339566,ENSP00000352516,ENSP00000353741,ENSP00000372804,ENSP00000380734,ENSP00000390475,ENSP00000395929,ENSP00000446880	BAZ2A,CARM1,CXXC1,DIMT1,DNMT1,ETF1,FAM103A1,FAM98B,HIST1H1C,HIST1H1E,MGMT,NSD1,NSUN5,RNMT,TGS1
GO:0000819	sister chromatid segregation	11	123	0.00021	ENSP00000300093,ENSP00000313851,ENSP00000313950,ENSP00000323421,ENSP00000349961,ENSP00000354720,ENSP00000354957,ENSP00000361298,ENSP00000361540,ENSP00000396704,ENSP00000411532	AURKB,CDC20,KIF2C,PDS5B,PLK1,SMC1A,SMC3,SMC4,SMC5,TOP2A,TOP2B
GO:0000723	telomere maintenance	10	101	0.00022	ENSP00000216714,ENSP00000254719,ENSP00000262887,ENSP00000265433,ENSP00000287437,ENSP00000354957,ENSP00000355759,ENSP00000358563,ENSP00000470142,ENSP00000480186	APEX1,DKC1,NBN,NSMCE2,PARP1,POLD2,RPA1,SMC5,UPF1,XRCC1
GO:0051098	regulation of binding	19	356	0.00022	ENSP00000204517,ENSP00000221419,ENSP00000224073,ENSP00000256383,ENSP00000296503,ENSP00000300093,ENSP00000313950,ENSP00000325690,ENSP00000326031,ENSP00000338573,ENSP00000355759,ENSP00000359506,ENSP00000359531,ENSP00000383042,ENSP00000395929,ENSP00000403701,ENSP00000430432,ENSP00000437621,ENSP00000473172	ARRB2,AURKB,CARM1,EDF1,EIF2S1,FMR1,GNL3L,GTF2B,HDAC2,HMGA2,HMGB2,HNRNPL,KDM1A,NSD1,PARP1,PLK1,PPP1CA,RUVBL2,TFAP4
GO:0051248	negative regulation of protein metabolic process	38	1075	0.00022	ENSP00000204517,ENSP00000240185,ENSP00000250113,ENSP00000256383,ENSP00000262887,ENSP00000278572,ENSP00000296930,ENSP00000300093,ENSP00000307863,ENSP00000311677,ENSP00000313199,ENSP00000315630,ENSP00000318195,ENSP00000323511,ENSP00000332706,ENSP00000338573,ENSP00000339095,ENSP00000349467,ENSP00000351015,ENSP00000352516,ENSP00000356448,ENSP00000358635,ENSP00000358866,ENSP00000359321,ENSP00000359506…	ARRB2,CALM1,CELF1,DDX3X,DNMT1,EIF2S1,FLNA,FMR1,FXR2,GNB2L1,GNL3L,HDAC2,HNRNPD,ILF3,MTF2,NCL,NF1,NPM1,PICALM,PLK1,PNKP,PPP1R10,PPP1R8,PTPN6,PURA,RPL13A,RPS3,RPS7,SWAP70,SYNCRIP,TARDBP,TFAP4,TPR,U2AF2,UPF1,VRK3,XRCC1,YWHAB
GO:2000002	negative regulation of DNA damage checkpoint	4	6	0.00022	ENSP00000261600,ENSP00000365694,ENSP00000379475,ENSP00000420306	DDX39B,PPP1R10,THOC1,THOC5
GO:0009314	response to radiation	21	425	0.00024	ENSP00000256383,ENSP00000262367,ENSP00000296930,ENSP00000301764,ENSP00000302111,ENSP00000313950,ENSP00000323421,ENSP00000323511,ENSP00000326031,ENSP00000341779,ENSP00000351015,ENSP00000355759,ENSP00000359506,ENSP00000373905,ENSP00000375892,ENSP00000376345,ENSP00000378769,ENSP00000383042,ENSP00000388648,ENSP00000410059,ENSP00000473172	AKT2,AURKB,CHEK1,CREBBP,DDB1,DNM2,EEF1D,EIF2S1,FMR1,GRB2,KDM1A,MGMT,NF1,NPM1,PARP1,PNKP,PPP1CA,PPP1CB,PPP1CC,RUVBL2,SMC1A
GO:1904356	regulation of telomere maintenance via telomere lengthening	8	62	0.00028	ENSP00000283179,ENSP00000313950,ENSP00000323511,ENSP00000338573,ENSP00000341826,ENSP00000346694,ENSP00000355759,ENSP00000358563	AURKB,DKC1,GNL3L,HNRNPA1,HNRNPA2B1,HNRNPU,PARP1,PNKP
GO:0070828	heterochromatin organization	5	16	0.00029	ENSP00000299736,ENSP00000312625,ENSP00000377601,ENSP00000399888,ENSP00000437621	CENPV,HELLS,HMGA1,HMGA2,HP1BP3
GO:0034250	positive regulation of cellular amide metabolic process	11	131	0.00034	ENSP00000221419,ENSP00000228251,ENSP00000296930,ENSP00000307940,ENSP00000313199,ENSP00000359506,ENSP00000377015,ENSP00000379475,ENSP00000382840,ENSP00000385269,ENSP00000426909	DDX39B,DDX3X,EEF2,ELAVL1,FMR1,GNB2L1,HNRNPD,HNRNPL,NPM1,PICALM,YBX3
GO:0080135	regulation of cellular response to stress	26	618	0.00034	ENSP00000225792,ENSP00000228251,ENSP00000254719,ENSP00000261600,ENSP00000262367,ENSP00000262887,ENSP00000276079,ENSP00000278572,ENSP00000296930,ENSP00000302111,ENSP00000307183,ENSP00000337623,ENSP00000349748,ENSP00000355759,ENSP00000359506,ENSP00000365694,ENSP00000365730,ENSP00000368565,ENSP00000379475,ENSP00000380414,ENSP00000383042,ENSP00000388648,ENSP00000399888,ENSP00000420306,ENSP00000426909…	CHEK1,CREBBP,DDX39B,DDX5,DEK,DNAJC2,FMR1,GNB2L1,HMGA1,HMGA2,ING2,KDM1A,MGMT,NONO,NPM1,PARP1,PPP1R10,RNASEH2B,RPA1,RPS3,SFPQ,STK24,THOC1,THOC5,XRCC1,YBX3
GO:0010948	negative regulation of cell cycle process	16	273	0.00036	ENSP00000204517,ENSP00000265433,ENSP00000296930,ENSP00000300093,ENSP00000311747,ENSP00000313950,ENSP00000323421,ENSP00000325690,ENSP00000336687,ENSP00000354720,ENSP00000356448,ENSP00000365694,ENSP00000369424,ENSP00000378699,ENSP00000388648,ENSP00000437621	AURKB,CARM1,CBX3,CDK1,CHEK1,HMGA2,NBN,NPM1,PLK1,PPP1R10,RBBP7,RBM14,SMC1A,SMC3,TFAP4,TPR
GO:0048524	positive regulation of viral process	9	85	0.00036	ENSP00000204517,ENSP00000261531,ENSP00000300026,ENSP00000301764,ENSP00000354720,ENSP00000359506,ENSP00000359531,ENSP00000382840,ENSP00000411532	DDB1,DDX3X,FMR1,GTF2B,PPIB,SMC3,SNW1,TFAP4,TOP2A
GO:0090068	positive regulation of cell cycle process	16	273	0.00036	ENSP00000216714,ENSP00000283179,ENSP00000287437,ENSP00000296930,ENSP00000299736,ENSP00000313950,ENSP00000325690,ENSP00000349748,ENSP00000354957,ENSP00000356448,ENSP00000364585,ENSP00000370968,ENSP00000378699,ENSP00000382840,ENSP00000437621,ENSP00000480893	APEX1,AURKB,CARM1,CDK1,CENPV,DDX3X,HMGA2,HNRNPU,MYBBP1A,NPM1,NSMCE2,RCC2,SFPQ,SMC5,SPAST,TPR
GO:2000001	regulation of DNA damage checkpoint	5	17	0.00036	ENSP00000261600,ENSP00000337623,ENSP00000365694,ENSP00000379475,ENSP00000420306	DDX39B,PPP1R10,RNASEH2B,THOC1,THOC5
GO:0009895	negative regulation of catabolic process	16	274	0.00037	ENSP00000228251,ENSP00000240185,ENSP00000268184,ENSP00000283179,ENSP00000313199,ENSP00000316042,ENSP00000331678,ENSP00000339095,ENSP00000341044,ENSP00000358563,ENSP00000358635,ENSP00000358866,ENSP00000359506,ENSP00000377954,ENSP00000385269,ENSP00000450909	ACACB,CRTC3,DKC1,ELAVL1,FLNA,FMR1,HNRNPA0,HNRNPD,HNRNPU,LARS,PKP3,RPS7,SLIRP,SYNCRIP,TARDBP,YBX3
GO:0046784	viral mRNA export from host cell nucleus	4	8	0.00047	ENSP00000261600,ENSP00000379475,ENSP00000420306,ENSP00000421592	ALYREF,DDX39B,THOC1,THOC5
GO:0007623	circadian rhythm	11	137	0.00048	ENSP00000221419,ENSP00000276079,ENSP00000283179,ENSP00000313199,ENSP00000321584,ENSP00000326031,ENSP00000341779,ENSP00000354522,ENSP00000370968,ENSP00000378769,ENSP00000430432	HDAC2,HNRNPD,HNRNPL,HNRNPU,IMPDH2,MYBBP1A,NONO,PPP1CA,PPP1CB,PPP1CC,TOP1
GO:1901976	regulation of cell cycle checkpoint	6	32	0.00048	ENSP00000261600,ENSP00000337623,ENSP00000356448,ENSP00000365694,ENSP00000379475,ENSP00000420306	DDX39B,PPP1R10,RNASEH2B,THOC1,THOC5,TPR
GO:2000573	positive regulation of DNA biosynthetic process	8	68	0.00049	ENSP00000313199,ENSP00000313950,ENSP00000323511,ENSP00000341826,ENSP00000346694,ENSP00000358563,ENSP00000379475,ENSP00000403701	ARRB2,AURKB,DDX39B,DKC1,HNRNPA1,HNRNPA2B1,HNRNPD,PNKP
GO:0019538	protein metabolic process	101	4194	0.0005	ENSP00000216181,ENSP00000216639,ENSP00000217182,ENSP00000231004,ENSP00000254730,ENSP00000256383,ENSP00000261308,ENSP00000262367,ENSP00000278572,ENSP00000287239,ENSP00000287437,ENSP00000293831,ENSP00000296411,ENSP00000300026,ENSP00000300093,ENSP00000301764,ENSP00000307705,ENSP00000307889,ENSP00000307940,ENSP00000309474,ENSP00000311747,ENSP00000313950,ENSP00000318297,ENSP00000320566,ENSP00000323065…	ADRM1,AKT2,ARRB2,AURKB,BAZ2A,BTK,C4orf27,CALM1,CARM1,CBFB,CDC20,CDK1,CHEK1,CREBBP,CXXC1,DDB1,DDX3X,EEF1A1,EEF1A2,EEF1B2,EEF1D,EEF1G,EEF2,EEFSEC,EIF2S1,EIF2S2,EIF4A1,ETF1,FAM98B,GADD45GIP1,GNB2L1,GRB2,GTF2B,HDAC2,HIST1H1C,HIST1H1E,HIST1H2BF,HMGA2,ILF3,ING3,ING4,KAT6B,KDM1A,LARS,LMO7,LOX,METAP1,MORF4L2,MYCBP2,MYH9,NCOA3,NF1,NOSIP,NSD1,NSMCE2,PARP1,PCBP2,PHF8,PLK1,PPIB,PPP1CA,PPP1CB,PPP1CC,PPWD1,PSM…
GO:0007059	chromosome segregation	15	253	0.00054	ENSP00000278572,ENSP00000300093,ENSP00000313851,ENSP00000313950,ENSP00000323421,ENSP00000349961,ENSP00000354522,ENSP00000354720,ENSP00000354957,ENSP00000361298,ENSP00000361540,ENSP00000362937,ENSP00000382840,ENSP00000396704,ENSP00000411532	AURKB,CDC20,DDX3X,KIF2C,PDS5B,PLK1,RCC1,RPS3,SMC1A,SMC3,SMC4,SMC5,TOP1,TOP2A,TOP2B
GO:0006886	intracellular protein transport	31	836	0.00055	ENSP00000261600,ENSP00000278572,ENSP00000296930,ENSP00000307863,ENSP00000307889,ENSP00000326261,ENSP00000337632,ENSP00000339095,ENSP00000346067,ENSP00000346694,ENSP00000356448,ENSP00000357283,ENSP00000357555,ENSP00000361076,ENSP00000361900,ENSP00000361930,ENSP00000365694,ENSP00000375730,ENSP00000375892,ENSP00000377954,ENSP00000379475,ENSP00000382091,ENSP00000386636,ENSP00000393241,ENSP00000420306…	AKT2,ALKBH5,ALYREF,DDX39B,HNRNPA2B1,LARS,LMNA,NPM1,NXF1,PPP1R10,RPL13,RPL13A,RPL27,RPL7A,RPLP0,RPS13,RPS18,RPS27,RPS3,RPS7,RPSA,SARNP,SRRM1,SSB,THOC1,THOC5,TOMM34,TPR,U2AF2,UPF1,YWHAB
GO:0010033	response to organic substance	74	2815	0.00055	ENSP00000204517,ENSP00000216714,ENSP00000219150,ENSP00000220325,ENSP00000221419,ENSP00000225792,ENSP00000228251,ENSP00000231004,ENSP00000256383,ENSP00000261531,ENSP00000262887,ENSP00000278572,ENSP00000283131,ENSP00000283179,ENSP00000287239,ENSP00000296503,ENSP00000296930,ENSP00000302111,ENSP00000306565,ENSP00000307940,ENSP00000311747,ENSP00000313199,ENSP00000316042,ENSP00000318195,ENSP00000321584…	ACACB,AKT2,APEX1,ARRB2,BTK,CARM1,CDK1,CORO1A,CXXC1,DDX1,DDX17,DDX21,DDX5,DHX15,DNAJB11,DNM2,DNMT1,EEF1A1,EEF1B2,EEF2,EHD4,EIF2S1,ESRRA,FAM83G,FMR1,GNB2L1,GRB2,HDAC2,HMGB2,HNRNPA0,HNRNPA1,HNRNPA2B1,HNRNPD,HNRNPDL,HNRNPH1,HNRNPL,HNRNPU,IMPDH2,ISG20,KAT6B,KDM1A,LARS,LMNA,LOX,MGMT,MTF2,NCL,NCOA3,NPM1,OAS1,PARP1,POU2F1,PRPF8,PTPN11,PTPN6,RBBP7,RBM14,RBMX,RNMT,RPL13A,RPL27,RPLP0,RPS3,RUVBL2,SAFB,SHMT2,…
GO:0009894	regulation of catabolic process	31	840	0.0006	ENSP00000216714,ENSP00000217182,ENSP00000228251,ENSP00000240185,ENSP00000268184,ENSP00000283179,ENSP00000287437,ENSP00000296930,ENSP00000300093,ENSP00000301764,ENSP00000309474,ENSP00000313199,ENSP00000316042,ENSP00000326031,ENSP00000331678,ENSP00000339063,ENSP00000339095,ENSP00000341044,ENSP00000358563,ENSP00000358635,ENSP00000358866,ENSP00000359506,ENSP00000360034,ENSP00000361930,ENSP00000375892…	ACACB,AKT2,ANP32A,APEX1,CRTC3,DDB1,DKC1,EEF1A1,EEF1A2,ELAVL1,FLNA,FMR1,GNB2L1,HNRNPA0,HNRNPD,HNRNPU,LARS,NPM1,NSMCE2,PKP3,PLK1,PPP1CA,PSMD1,RPS7,SERBP1,SLIRP,SYNCRIP,TARDBP,UPF1,YBX3,YWHAB
GO:0018193	peptidyl-amino acid modification	31	842	0.00062	ENSP00000216639,ENSP00000261308,ENSP00000262367,ENSP00000287239,ENSP00000287437,ENSP00000296411,ENSP00000300026,ENSP00000300093,ENSP00000307705,ENSP00000313950,ENSP00000318297,ENSP00000320566,ENSP00000325690,ENSP00000339566,ENSP00000354522,ENSP00000355759,ENSP00000361066,ENSP00000375892,ENSP00000376345,ENSP00000378699,ENSP00000380024,ENSP00000388648,ENSP00000390475,ENSP00000391592,ENSP00000394417…	AKT2,AURKB,BTK,C4orf27,CARM1,CDK1,CHEK1,CREBBP,CXXC1,GRB2,HIST1H1C,HIST1H1E,HMGA2,ING3,ING4,KAT6B,METAP1,MORF4L2,NCOA3,NSD1,NSMCE2,PARP1,PLK1,PPIB,PPWD1,PTPN6,RUVBL1,RUVBL2,TOP1,VRK1,VRK3
GO:0006265	DNA topological change	4	9	0.00064	ENSP00000296503,ENSP00000354522,ENSP00000396704,ENSP00000411532	HMGB2,TOP1,TOP2A,TOP2B
GO:0006446	regulation of translational initiation	8	71	0.00064	ENSP00000256383,ENSP00000296930,ENSP00000326031,ENSP00000356448,ENSP00000359506,ENSP00000370745,ENSP00000375730,ENSP00000382840	DDX1,DDX3X,EIF2S1,FMR1,NPM1,PPP1CA,RPL13A,TPR
GO:0009628	response to abiotic stimulus	36	1052	0.00064	ENSP00000217182,ENSP00000228251,ENSP00000256383,ENSP00000262367,ENSP00000262887,ENSP00000296930,ENSP00000301764,ENSP00000302111,ENSP00000312625,ENSP00000313199,ENSP00000313950,ENSP00000323421,ENSP00000323511,ENSP00000326031,ENSP00000340944,ENSP00000341779,ENSP00000348461,ENSP00000351015,ENSP00000355759,ENSP00000356448,ENSP00000357283,ENSP00000359506,ENSP00000369424,ENSP00000370109,ENSP00000373905…	AKT2,ALKBH5,ARRB2,AURKB,CHEK1,CREBBP,DDB1,DDX3X,DNM2,EEF1A2,EEF1D,EIF2S1,FMR1,GRB2,HDAC2,HNRNPD,HP1BP3,KDM1A,LMNA,MGMT,NF1,NPM1,PARP1,PNKP,PPP1CA,PPP1CB,PPP1CC,PSIP1,PTPN11,RAC1,RBBP7,RUVBL2,SMC1A,TPR,XRCC1,YBX3
GO:1905269	positive regulation of chromatin organization	9	93	0.00064	ENSP00000261531,ENSP00000307183,ENSP00000352516,ENSP00000356448,ENSP00000359321,ENSP00000359506,ENSP00000373772,ENSP00000383042,ENSP00000473172	DNMT1,FMR1,ING2,KDM1A,MTF2,RNF20,RUVBL2,SNW1,TPR
GO:0009416	response to light stimulus	16	290	0.00065	ENSP00000256383,ENSP00000262367,ENSP00000296930,ENSP00000301764,ENSP00000313950,ENSP00000326031,ENSP00000341779,ENSP00000351015,ENSP00000355759,ENSP00000359506,ENSP00000373905,ENSP00000375892,ENSP00000378769,ENSP00000383042,ENSP00000388648,ENSP00000473172	AKT2,AURKB,CHEK1,CREBBP,DDB1,DNM2,EIF2S1,FMR1,KDM1A,NF1,NPM1,PARP1,PPP1CA,PPP1CB,PPP1CC,RUVBL2
GO:1901673	regulation of mitotic spindle assembly	5	20	0.00065	ENSP00000283179,ENSP00000300093,ENSP00000323421,ENSP00000354720,ENSP00000356448	HNRNPU,PLK1,SMC1A,SMC3,TPR
GO:0006998	nuclear envelope organization	7	52	0.00067	ENSP00000216639,ENSP00000240185,ENSP00000300093,ENSP00000310275,ENSP00000357283,ENSP00000378699,ENSP00000480893	BANF1,CDK1,LMNA,PLK1,SPAST,TARDBP,VRK1
GO:0051983	regulation of chromosome segregation	9	97	0.00084	ENSP00000283179,ENSP00000287437,ENSP00000300093,ENSP00000313950,ENSP00000349748,ENSP00000354957,ENSP00000356448,ENSP00000361298,ENSP00000364585	AURKB,HNRNPU,KIF2C,NSMCE2,PLK1,RCC2,SFPQ,SMC5,TPR
GO:0031330	negative regulation of cellular catabolic process	14	234	0.00085	ENSP00000228251,ENSP00000240185,ENSP00000283179,ENSP00000313199,ENSP00000316042,ENSP00000331678,ENSP00000339095,ENSP00000341044,ENSP00000358563,ENSP00000358635,ENSP00000359506,ENSP00000377954,ENSP00000385269,ENSP00000450909	ACACB,DKC1,ELAVL1,FMR1,HNRNPA0,HNRNPD,HNRNPU,LARS,PKP3,RPS7,SLIRP,SYNCRIP,TARDBP,YBX3
GO:0031507	heterochromatin assembly	4	10	0.00086	ENSP00000299736,ENSP00000377601,ENSP00000399888,ENSP00000437621	CENPV,HELLS,HMGA1,HMGA2
GO:0032922	circadian regulation of gene expression	7	55	0.00091	ENSP00000283179,ENSP00000326031,ENSP00000341779,ENSP00000354522,ENSP00000370968,ENSP00000378769,ENSP00000430432	HDAC2,HNRNPU,MYBBP1A,PPP1CA,PPP1CB,PPP1CC,TOP1
GO:0030520	intracellular estrogen receptor signaling pathway	5	22	0.00094	ENSP00000225792,ENSP00000311747,ENSP00000325690,ENSP00000380033,ENSP00000467423	CARM1,DDX17,DDX5,RBM14,SAFB
GO:0006997	nucleus organization	10	124	0.00098	ENSP00000216639,ENSP00000240185,ENSP00000296503,ENSP00000300093,ENSP00000310275,ENSP00000356448,ENSP00000357283,ENSP00000366604,ENSP00000378699,ENSP00000480893	BANF1,CDK1,HMGB2,LMNA,PLK1,SF1,SPAST,TARDBP,TPR,VRK1
GO:0032205	negative regulation of telomere maintenance	6	38	0.001	ENSP00000262887,ENSP00000265433,ENSP00000283179,ENSP00000338573,ENSP00000341826,ENSP00000355759	GNL3L,HNRNPA1,HNRNPU,NBN,PARP1,XRCC1
GO:0006297	nucleotide-excision repair, DNA gap filling	5	23	0.0011	ENSP00000254719,ENSP00000262887,ENSP00000263274,ENSP00000367787,ENSP00000480186	LIG1,LIG3,POLD2,RPA1,XRCC1
GO:0016458	gene silencing	12	180	0.0011	ENSP00000283131,ENSP00000332194,ENSP00000346694,ENSP00000346762,ENSP00000352516,ENSP00000359506,ENSP00000377601,ENSP00000380033,ENSP00000394417,ENSP00000430432,ENSP00000435926,ENSP00000446880	BAZ2A,CELF1,DDX17,DNMT1,FMR1,HDAC2,HELLS,HIST2H2AC,HNRNPA2B1,MORF4L2,SMARCA5,SND1
GO:0016575	histone deacetylation	7	57	0.0011	ENSP00000311747,ENSP00000349748,ENSP00000369424,ENSP00000383042,ENSP00000394417,ENSP00000430432,ENSP00000446880	BAZ2A,HDAC2,KDM1A,MORF4L2,RBBP7,RBM14,SFPQ
GO:0045786	negative regulation of cell cycle	22	517	0.0011	ENSP00000204517,ENSP00000265433,ENSP00000296930,ENSP00000300093,ENSP00000302886,ENSP00000311747,ENSP00000313950,ENSP00000323065,ENSP00000323421,ENSP00000325690,ENSP00000336687,ENSP00000340944,ENSP00000354720,ENSP00000356448,ENSP00000365694,ENSP00000369424,ENSP00000378699,ENSP00000380024,ENSP00000388648,ENSP00000396704,ENSP00000411532,ENSP00000437621	AURKB,CARM1,CBX3,CDK1,CHEK1,GADD45GIP1,HMGA2,ING4,NBN,NPM1,PA2G4,PLK1,PPP1R10,PTPN11,RBBP7,RBM14,SMC1A,SMC3,TFAP4,TOP2A,TOP2B,TPR
GO:0051103	DNA ligation involved in DNA repair	4	11	0.0011	ENSP00000262887,ENSP00000296503,ENSP00000355759,ENSP00000367787	HMGB2,LIG3,PARP1,XRCC1
GO:0007062	sister chromatid cohesion	6	39	0.0012	ENSP00000300093,ENSP00000313851,ENSP00000323421,ENSP00000354720,ENSP00000354957,ENSP00000361540	CDC20,PDS5B,PLK1,SMC1A,SMC3,SMC5
GO:0034502	protein localization to chromosome	7	58	0.0012	ENSP00000254719,ENSP00000300093,ENSP00000313950,ENSP00000325690,ENSP00000364585,ENSP00000378699,ENSP00000473172	AURKB,CARM1,CDK1,PLK1,RCC2,RPA1,RUVBL2
GO:0000245	spliceosomal complex assembly	7	59	0.0013	ENSP00000359645,ENSP00000366604,ENSP00000370109,ENSP00000370745,ENSP00000379475,ENSP00000435926,ENSP00000443926	CELF1,CELF2,DDX1,DDX39B,PSIP1,RBMX,SF1
GO:1901796	regulation of signal transduction by p53 class mediator	10	129	0.0013	ENSP00000216297,ENSP00000225792,ENSP00000278412,ENSP00000307183,ENSP00000313950,ENSP00000339095,ENSP00000340271,ENSP00000383042,ENSP00000388648,ENSP00000403902	AURKB,CHEK1,DDX5,ING2,KDM1A,PPP1R13L,RPS7,SSRP1,SUPT16H,TAF3
GO:0032786	positive regulation of DNA-templated transcription, elongation	5	25	0.0015	ENSP00000216297,ENSP00000261600,ENSP00000379475,ENSP00000420306,ENSP00000421592	ALYREF,DDX39B,SUPT16H,THOC1,THOC5
GO:0051984	positive regulation of chromosome segregation	5	25	0.0015	ENSP00000283179,ENSP00000287437,ENSP00000349748,ENSP00000354957,ENSP00000364585	HNRNPU,NSMCE2,RCC2,SFPQ,SMC5
GO:0071310	cellular response to organic substance	60	2219	0.0015	ENSP00000204517,ENSP00000216714,ENSP00000219150,ENSP00000220325,ENSP00000225792,ENSP00000228251,ENSP00000256383,ENSP00000261531,ENSP00000278572,ENSP00000283131,ENSP00000283179,ENSP00000287239,ENSP00000296503,ENSP00000296930,ENSP00000302111,ENSP00000306565,ENSP00000307940,ENSP00000311747,ENSP00000313199,ENSP00000318195,ENSP00000321584,ENSP00000325690,ENSP00000339063,ENSP00000340944,ENSP00000341826…	AKT2,APEX1,ARRB2,BTK,CARM1,CORO1A,CXXC1,DDX17,DDX5,DNAJB11,DNM2,DNMT1,EEF1A1,EEF2,EHD4,EIF2S1,ESRRA,FAM83G,GNB2L1,GRB2,HDAC2,HMGB2,HNRNPA1,HNRNPA2B1,HNRNPD,HNRNPDL,HNRNPH1,HNRNPU,IMPDH2,ISG20,KAT6B,KDM1A,LARS,LMNA,MGMT,MTF2,NCL,NCOA3,NPM1,OAS1,PARP1,POU2F1,PRPF8,PTPN11,PTPN6,RBM14,RBMX,RNMT,RPL13A,RPLP0,RPS3,RUVBL2,SAFB,SMARCA5,SNW1,SYNCRIP,TFAP4,TPR,UPF1,YBX3
GO:2001242	regulation of intrinsic apoptotic signaling pathway	11	159	0.0015	ENSP00000228251,ENSP00000276079,ENSP00000278572,ENSP00000307183,ENSP00000325958,ENSP00000339095,ENSP00000349748,ENSP00000355759,ENSP00000382840,ENSP00000383042,ENSP00000426909	DDX3X,GNB2L1,ING2,KDM1A,NONO,PARP1,PTPMT1,RPS3,RPS7,SFPQ,YBX3
GO:0051100	negative regulation of binding	11	161	0.0016	ENSP00000204517,ENSP00000256383,ENSP00000313950,ENSP00000325690,ENSP00000326031,ENSP00000338573,ENSP00000383042,ENSP00000403701,ENSP00000430432,ENSP00000437621,ENSP00000473172	ARRB2,AURKB,CARM1,EIF2S1,GNL3L,HDAC2,HMGA2,KDM1A,PPP1CA,RUVBL2,TFAP4
GO:0031056	regulation of histone modification	10	134	0.0017	ENSP00000261531,ENSP00000307183,ENSP00000352516,ENSP00000359321,ENSP00000359506,ENSP00000373772,ENSP00000383042,ENSP00000388648,ENSP00000395929,ENSP00000473172	CHEK1,DNMT1,FMR1,ING2,KDM1A,MTF2,NSD1,RNF20,RUVBL2,SNW1
GO:0033119	negative regulation of RNA splicing	5	26	0.0017	ENSP00000221419,ENSP00000307863,ENSP00000346694,ENSP00000359645,ENSP00000435777	HNRNPA2B1,HNRNPL,RBMX,RPS13,U2AF2
GO:0070887	cellular response to chemical stimulus	69	2672	0.0017	ENSP00000204517,ENSP00000216714,ENSP00000219150,ENSP00000220325,ENSP00000225792,ENSP00000228251,ENSP00000254108,ENSP00000256383,ENSP00000261531,ENSP00000262367,ENSP00000278572,ENSP00000283131,ENSP00000283179,ENSP00000287239,ENSP00000296503,ENSP00000296930,ENSP00000302111,ENSP00000306565,ENSP00000307940,ENSP00000311747,ENSP00000312625,ENSP00000313199,ENSP00000318195,ENSP00000321584,ENSP00000325690…	AKT2,APEX1,ARRB2,BTK,CARM1,CDK1,CORO1A,CREBBP,CXXC1,DDX17,DDX3X,DDX5,DNAJB11,DNM2,DNMT1,EEF1A1,EEF2,EHD4,EIF2S1,ESRRA,FAM83G,FMR1,FUS,GNB2L1,GRB2,HDAC2,HMGB2,HNRNPA1,HNRNPA2B1,HNRNPD,HNRNPDL,HNRNPH1,HNRNPU,HP1BP3,IMPDH2,ISG20,KAT6B,KDM1A,LARS,LMNA,MGMT,MTF2,NCL,NCOA3,NPM1,OAS1,PARP1,POU2F1,PRPF8,PTPN11,PTPN6,RAC1,RBM14,RBMX,RNMT,RPL13A,RPLP0,RPS3,RUVBL2,SAFB,SMARCA5,SNW1,STK24,SYNCRIP,TFAP2A,TFAP…
GO:1904353	regulation of telomere capping	5	26	0.0017	ENSP00000262887,ENSP00000265433,ENSP00000313199,ENSP00000313950,ENSP00000323511	AURKB,HNRNPD,NBN,PNKP,XRCC1
GO:2001233	regulation of apoptotic signaling pathway	18	388	0.0017	ENSP00000204517,ENSP00000228251,ENSP00000276079,ENSP00000278572,ENSP00000296503,ENSP00000307183,ENSP00000325958,ENSP00000326031,ENSP00000339095,ENSP00000349748,ENSP00000351015,ENSP00000355759,ENSP00000357283,ENSP00000361930,ENSP00000382840,ENSP00000383042,ENSP00000403701,ENSP00000426909	ARRB2,DDX3X,GNB2L1,HMGB2,ING2,KDM1A,LMNA,NF1,NONO,PARP1,PPP1CA,PTPMT1,RPS3,RPS7,SFPQ,TFAP4,YBX3,YWHAB
GO:0007568	aging	14	255	0.0018	ENSP00000216714,ENSP00000256383,ENSP00000287437,ENSP00000296930,ENSP00000307940,ENSP00000313950,ENSP00000325690,ENSP00000354957,ENSP00000376345,ENSP00000377015,ENSP00000378699,ENSP00000388648,ENSP00000399888,ENSP00000437621	APEX1,AURKB,CARM1,CDK1,CHEK1,EEF2,EIF2S1,GRB2,HMGA1,HMGA2,NPM1,NSMCE2,PICALM,SMC5
GO:0006289	nucleotide-excision repair	9	110	0.0019	ENSP00000254719,ENSP00000262887,ENSP00000263274,ENSP00000301764,ENSP00000323511,ENSP00000355759,ENSP00000358262,ENSP00000367787,ENSP00000480186	CHD1L,DDB1,LIG1,LIG3,PARP1,PNKP,POLD2,RPA1,XRCC1
GO:0031058	positive regulation of histone modification	8	86	0.0019	ENSP00000261531,ENSP00000307183,ENSP00000352516,ENSP00000359321,ENSP00000359506,ENSP00000373772,ENSP00000383042,ENSP00000473172	DNMT1,FMR1,ING2,KDM1A,MTF2,RNF20,RUVBL2,SNW1
GO:0044093	positive regulation of molecular function	49	1713	0.0019	ENSP00000204517,ENSP00000217182,ENSP00000221419,ENSP00000224073,ENSP00000256383,ENSP00000262887,ENSP00000265433,ENSP00000268184,ENSP00000269321,ENSP00000278572,ENSP00000280333,ENSP00000283179,ENSP00000296503,ENSP00000296930,ENSP00000300093,ENSP00000313199,ENSP00000313950,ENSP00000323511,ENSP00000325690,ENSP00000338573,ENSP00000340944,ENSP00000346694,ENSP00000349467,ENSP00000351015,ENSP00000355759…	ADRM1,AKT2,ARHGDIA,AURKB,BTK,CALM1,CARM1,CDC20,CDK1,CRTC3,DDX3X,DKC1,DNAJB11,DNAJC2,DNM2,DOCK1,EDF1,EEF1A2,EIF2S1,FAM58A,FMR1,GNB2L1,GNL3L,GTF2B,HMGA2,HMGB2,HNRNPA2B1,HNRNPD,HNRNPL,HNRNPU,KDM1A,LARS,NBN,NCOA3,NF1,NPM1,PARP1,PICALM,PLK1,PNKP,PTPN11,RCC2,RPS3,STK24,TFAP4,UHRF1,VRK3,XRCC1,YWHAB
GO:0045727	positive regulation of translation	9	110	0.0019	ENSP00000221419,ENSP00000228251,ENSP00000296930,ENSP00000307940,ENSP00000313199,ENSP00000359506,ENSP00000379475,ENSP00000382840,ENSP00000385269	DDX39B,DDX3X,EEF2,ELAVL1,FMR1,HNRNPD,HNRNPL,NPM1,YBX3
GO:0090501	RNA phosphodiester bond hydrolysis	10	137	0.0019	ENSP00000216714,ENSP00000266679,ENSP00000301364,ENSP00000306565,ENSP00000311677,ENSP00000315791,ENSP00000337623,ENSP00000345412,ENSP00000346067,ENSP00000366396	APEX1,CPSF6,CPSF7,CSTF3,ISG20,PPP1R8,RNASEH2B,RPSA,TSR1,XRN2
GO:0009299	mRNA transcription	5	27	0.002	ENSP00000225792,ENSP00000257915,ENSP00000313199,ENSP00000358866,ENSP00000410059	DDX5,EEF1D,FLNA,HNRNPD,TFCP2
GO:0032784	regulation of DNA-templated transcription, elongation	6	44	0.002	ENSP00000216297,ENSP00000261600,ENSP00000283179,ENSP00000379475,ENSP00000420306,ENSP00000421592	ALYREF,DDX39B,HNRNPU,SUPT16H,THOC1,THOC5
GO:0043921	modulation by host of viral transcription	5	27	0.002	ENSP00000204517,ENSP00000240185,ENSP00000261531,ENSP00000359531,ENSP00000437621	GTF2B,HMGA2,SNW1,TARDBP,TFAP4
GO:0031329	regulation of cellular catabolic process	27	743	0.0021	ENSP00000216714,ENSP00000217182,ENSP00000228251,ENSP00000240185,ENSP00000283179,ENSP00000287437,ENSP00000296930,ENSP00000300093,ENSP00000313199,ENSP00000316042,ENSP00000326031,ENSP00000331678,ENSP00000339063,ENSP00000339095,ENSP00000341044,ENSP00000358563,ENSP00000358635,ENSP00000359506,ENSP00000360034,ENSP00000361930,ENSP00000375892,ENSP00000377954,ENSP00000385269,ENSP00000417864,ENSP00000426909…	ACACB,AKT2,ANP32A,APEX1,DKC1,EEF1A1,EEF1A2,ELAVL1,FMR1,GNB2L1,HNRNPA0,HNRNPD,HNRNPU,LARS,NPM1,NSMCE2,PKP3,PLK1,PPP1CA,RPS7,SERBP1,SLIRP,SYNCRIP,TARDBP,UPF1,YBX3,YWHAB
GO:0016572	histone phosphorylation	5	28	0.0022	ENSP00000216639,ENSP00000313950,ENSP00000378699,ENSP00000388648,ENSP00000437621	AURKB,CDK1,CHEK1,HMGA2,VRK1
GO:0070935	3'-UTR-mediated mRNA stabilization	4	14	0.0022	ENSP00000228251,ENSP00000240185,ENSP00000316042,ENSP00000385269	ELAVL1,HNRNPA0,TARDBP,YBX3
GO:0007569	cell aging	7	66	0.0023	ENSP00000287437,ENSP00000296930,ENSP00000354957,ENSP00000378699,ENSP00000388648,ENSP00000399888,ENSP00000437621	CDK1,CHEK1,HMGA1,HMGA2,NPM1,NSMCE2,SMC5
GO:0031055	chromatin remodeling at centromere	6	46	0.0024	ENSP00000283131,ENSP00000296930,ENSP00000299736,ENSP00000318297,ENSP00000369424,ENSP00000377601	CENPV,HELLS,NPM1,RBBP7,RUVBL1,SMARCA5
GO:0031400	negative regulation of protein modification process	23	592	0.0025	ENSP00000204517,ENSP00000240185,ENSP00000262887,ENSP00000278572,ENSP00000296930,ENSP00000300093,ENSP00000307863,ENSP00000311677,ENSP00000315630,ENSP00000323511,ENSP00000338573,ENSP00000339095,ENSP00000349467,ENSP00000351015,ENSP00000352516,ENSP00000359321,ENSP00000361930,ENSP00000365694,ENSP00000391592,ENSP00000403701,ENSP00000426909,ENSP00000430432,ENSP00000469880	ARRB2,CALM1,DNMT1,GNB2L1,GNL3L,HDAC2,MTF2,NF1,NPM1,PLK1,PNKP,PPP1R10,PPP1R8,PTPN6,RPS3,RPS7,SWAP70,TARDBP,TFAP4,U2AF2,VRK3,XRCC1,YWHAB
GO:0006414	translational elongation	9	116	0.0026	ENSP00000217182,ENSP00000254730,ENSP00000307940,ENSP00000323065,ENSP00000331901,ENSP00000339063,ENSP00000376056,ENSP00000410059,ENSP00000426909	EEF1A1,EEF1A2,EEF1B2,EEF1D,EEF1G,EEF2,EEFSEC,GADD45GIP1,GNB2L1
GO:0051101	regulation of DNA binding	9	116	0.0026	ENSP00000204517,ENSP00000224073,ENSP00000296503,ENSP00000355759,ENSP00000359531,ENSP00000383042,ENSP00000395929,ENSP00000430432,ENSP00000437621	EDF1,GTF2B,HDAC2,HMGA2,HMGB2,KDM1A,NSD1,PARP1,TFAP4
GO:1900024	regulation of substrate adhesion-dependent cell spreading	6	47	0.0026	ENSP00000280333,ENSP00000348461,ENSP00000358866,ENSP00000364585,ENSP00000369270,ENSP00000373905	DNM2,DOCK1,FLNA,RAC1,RCC2,RREB1
GO:0010216	maintenance of DNA methylation	3	5	0.0027	ENSP00000352516,ENSP00000377601,ENSP00000479617	DNMT1,HELLS,UHRF1
GO:0031468	nuclear envelope reassembly	4	15	0.0027	ENSP00000216639,ENSP00000310275,ENSP00000357283,ENSP00000480893	BANF1,LMNA,SPAST,VRK1
GO:0043968	histone H2A acetylation	4	15	0.0027	ENSP00000318297,ENSP00000320566,ENSP00000394417,ENSP00000473172	ING3,MORF4L2,RUVBL1,RUVBL2
GO:0045814	negative regulation of gene expression, epigenetic	9	117	0.0027	ENSP00000283131,ENSP00000332194,ENSP00000352516,ENSP00000359321,ENSP00000369424,ENSP00000377601,ENSP00000394417,ENSP00000430432,ENSP00000446880	BAZ2A,DNMT1,HDAC2,HELLS,HIST2H2AC,MORF4L2,MTF2,RBBP7,SMARCA5
GO:0045931	positive regulation of mitotic cell cycle	10	144	0.0027	ENSP00000216714,ENSP00000283179,ENSP00000287437,ENSP00000340944,ENSP00000354957,ENSP00000356448,ENSP00000364585,ENSP00000365694,ENSP00000378699,ENSP00000382840	APEX1,CDK1,DDX3X,HNRNPU,NSMCE2,PPP1R10,PTPN11,RCC2,SMC5,TPR
GO:0043900	regulation of multi-organism process	17	372	0.0028	ENSP00000204517,ENSP00000225792,ENSP00000240185,ENSP00000261531,ENSP00000300026,ENSP00000301764,ENSP00000306565,ENSP00000310275,ENSP00000352438,ENSP00000354720,ENSP00000359506,ENSP00000359531,ENSP00000382840,ENSP00000388001,ENSP00000404121,ENSP00000411532,ENSP00000437621	BANF1,DDB1,DDX3X,DDX5,FMR1,GTF2B,HMGA2,ILF3,ISG20,OAS1,PCBP2,PPIB,SMC3,SNW1,TARDBP,TFAP4,TOP2A
GO:0006376	mRNA splice site selection	5	30	0.0029	ENSP00000359645,ENSP00000366604,ENSP00000370109,ENSP00000435926,ENSP00000443926	CELF1,CELF2,PSIP1,RBMX,SF1
GO:0009615	response to virus	14	270	0.0029	ENSP00000306565,ENSP00000310275,ENSP00000331901,ENSP00000346120,ENSP00000352438,ENSP00000359506,ENSP00000370745,ENSP00000375863,ENSP00000380033,ENSP00000382840,ENSP00000388001,ENSP00000399888,ENSP00000404121,ENSP00000437621	BANF1,DDX1,DDX17,DDX21,DDX3X,EEF1G,FMR1,HMGA1,HMGA2,HNRNPUL1,ILF3,ISG20,OAS1,PCBP2
GO:0050686	negative regulation of mRNA processing	5	30	0.0029	ENSP00000221419,ENSP00000307863,ENSP00000346694,ENSP00000359645,ENSP00000373772	HNRNPA2B1,HNRNPL,RBMX,RNF20,U2AF2
GO:0000380	alternative mRNA splicing, via spliceosome	4	16	0.0032	ENSP00000225792,ENSP00000349748,ENSP00000380033,ENSP00000383042	DDX17,DDX5,KDM1A,SFPQ
GO:0006464	cellular protein modification process	74	2999	0.0032	ENSP00000216639,ENSP00000231004,ENSP00000256383,ENSP00000261308,ENSP00000262367,ENSP00000287239,ENSP00000287437,ENSP00000296411,ENSP00000300026,ENSP00000300093,ENSP00000301764,ENSP00000307705,ENSP00000309474,ENSP00000311747,ENSP00000313950,ENSP00000318297,ENSP00000320566,ENSP00000325690,ENSP00000325958,ENSP00000326031,ENSP00000333667,ENSP00000338413,ENSP00000339566,ENSP00000340944,ENSP00000341779…	ADRM1,AKT2,ARRB2,AURKB,BAZ2A,BTK,C4orf27,CALM1,CARM1,CBFB,CDC20,CDK1,CHEK1,CREBBP,CXXC1,DDB1,EIF2S1,ETF1,FAM98B,GNB2L1,GRB2,GTF2B,HDAC2,HIST1H1C,HIST1H1E,HIST1H2BF,HMGA2,ILF3,ING3,ING4,KAT6B,KDM1A,LMO7,LOX,METAP1,MORF4L2,MYCBP2,NCOA3,NF1,NOSIP,NSD1,NSMCE2,PARP1,PHF8,PLK1,PPIB,PPP1CA,PPP1CB,PPP1CC,PPWD1,PSMD1,PTPMT1,PTPN11,PTPN6,RAC1,RBBP7,RBM14,RNF20,RNGTT,RPRD1B,RUVBL1,RUVBL2,SBF1,SFPQ,SHMT2,SPT…
GO:0033120	positive regulation of RNA splicing	5	31	0.0032	ENSP00000233078,ENSP00000261531,ENSP00000307863,ENSP00000359645,ENSP00000390625	DAZAP1,HNRNPLL,RBMX,SNW1,U2AF2
GO:0006302	double-strand break repair	11	178	0.0033	ENSP00000254719,ENSP00000262887,ENSP00000265433,ENSP00000287437,ENSP00000336606,ENSP00000349748,ENSP00000354957,ENSP00000355759,ENSP00000367787,ENSP00000370745,ENSP00000416739	DDX1,LIG3,NBN,NSMCE2,PARP1,RAD54B,RECQL,RPA1,SFPQ,SMC5,XRCC1
GO:0034508	centromere complex assembly	6	50	0.0034	ENSP00000283131,ENSP00000296930,ENSP00000299736,ENSP00000318297,ENSP00000369424,ENSP00000377601	CENPV,HELLS,NPM1,RBBP7,RUVBL1,SMARCA5
GO:0016573	histone acetylation	8	96	0.0035	ENSP00000262367,ENSP00000287239,ENSP00000318297,ENSP00000320566,ENSP00000361066,ENSP00000380024,ENSP00000394417,ENSP00000473172	CREBBP,ING3,ING4,KAT6B,MORF4L2,NCOA3,RUVBL1,RUVBL2
GO:0031572	G2 DNA damage checkpoint	5	32	0.0036	ENSP00000265433,ENSP00000300093,ENSP00000378699,ENSP00000388648,ENSP00000437621	CDK1,CHEK1,HMGA2,NBN,PLK1
GO:1900026	positive regulation of substrate adhesion-dependent cell spreading	5	32	0.0036	ENSP00000280333,ENSP00000348461,ENSP00000358866,ENSP00000369270,ENSP00000373905	DNM2,DOCK1,FLNA,RAC1,RREB1
GO:0098501	polynucleotide dephosphorylation	3	6	0.0038	ENSP00000216714,ENSP00000323511,ENSP00000358497	APEX1,PNKP,RNGTT
GO:0042752	regulation of circadian rhythm	8	98	0.0039	ENSP00000276079,ENSP00000313199,ENSP00000326031,ENSP00000341779,ENSP00000343966,ENSP00000349748,ENSP00000378769,ENSP00000411532	HNRNPD,NONO,PPP1CA,PPP1CB,PPP1CC,PSPC1,SFPQ,TOP2A
GO:1901987	regulation of cell cycle phase transition	17	385	0.0039	ENSP00000204517,ENSP00000216714,ENSP00000265433,ENSP00000287437,ENSP00000296930,ENSP00000300093,ENSP00000301764,ENSP00000313950,ENSP00000325690,ENSP00000337623,ENSP00000356448,ENSP00000364585,ENSP00000378699,ENSP00000382840,ENSP00000388648,ENSP00000391592,ENSP00000437621	APEX1,AURKB,CARM1,CDK1,CHEK1,DDB1,DDX3X,HMGA2,NBN,NPM1,NSMCE2,PLK1,PTPN6,RCC2,RNASEH2B,TFAP4,TPR
GO:0006473	protein acetylation	9	125	0.004	ENSP00000262367,ENSP00000287239,ENSP00000318297,ENSP00000320566,ENSP00000359531,ENSP00000361066,ENSP00000380024,ENSP00000394417,ENSP00000473172	CREBBP,GTF2B,ING3,ING4,KAT6B,MORF4L2,NCOA3,RUVBL1,RUVBL2
GO:0044087	regulation of cellular component biogenesis	29	867	0.0041	ENSP00000199320,ENSP00000219150,ENSP00000254719,ENSP00000265073,ENSP00000278572,ENSP00000283179,ENSP00000296930,ENSP00000300093,ENSP00000301764,ENSP00000311747,ENSP00000315630,ENSP00000323421,ENSP00000340944,ENSP00000348461,ENSP00000349259,ENSP00000354720,ENSP00000355759,ENSP00000356448,ENSP00000358262,ENSP00000358866,ENSP00000359506,ENSP00000359531,ENSP00000364585,ENSP00000373905,ENSP00000375730…	CBFB,CHD1L,CORO1A,DDB1,DDX3X,DIMT1,DNM2,FLNA,FMR1,GNB2L1,GRB2,GTF2B,HNRNPU,NPM1,PARP1,PLK1,PTPN11,RAC1,RBM14,RCC2,RPA1,RPL13A,RPS3,SMC1A,SMC3,SPTBN1,SUB1,SWAP70,TPR
GO:0090150	establishment of protein localization to membrane	12	217	0.0044	ENSP00000278572,ENSP00000307889,ENSP00000339095,ENSP00000346067,ENSP00000349259,ENSP00000357555,ENSP00000361076,ENSP00000375730,ENSP00000393241,ENSP00000435777,ENSP00000449328,ENSP00000464813	RPL13,RPL13A,RPL27,RPL7A,RPLP0,RPS13,RPS18,RPS27,RPS3,RPS7,RPSA,SPTBN1
GO:0018205	peptidyl-lysine modification	13	250	0.0045	ENSP00000262367,ENSP00000287239,ENSP00000287437,ENSP00000307705,ENSP00000318297,ENSP00000320566,ENSP00000339566,ENSP00000361066,ENSP00000380024,ENSP00000390475,ENSP00000394417,ENSP00000395929,ENSP00000473172	CREBBP,CXXC1,HIST1H1C,HIST1H1E,ING3,ING4,KAT6B,MORF4L2,NCOA3,NSD1,NSMCE2,RUVBL1,RUVBL2
GO:0006282	regulation of DNA repair	8	101	0.0046	ENSP00000262887,ENSP00000278572,ENSP00000302111,ENSP00000355759,ENSP00000380414,ENSP00000383042,ENSP00000388648,ENSP00000437621	CHEK1,DEK,HMGA2,KDM1A,MGMT,PARP1,RPS3,XRCC1
GO:0032210	regulation of telomere maintenance via telomerase	6	54	0.0047	ENSP00000283179,ENSP00000313950,ENSP00000323511,ENSP00000338573,ENSP00000341826,ENSP00000358563	AURKB,DKC1,GNL3L,HNRNPA1,HNRNPU,PNKP
GO:0050896	response to stimulus	160	7824	0.0047	ENSP00000204517,ENSP00000216181,ENSP00000216297,ENSP00000216714,ENSP00000217182,ENSP00000219150,ENSP00000220325,ENSP00000221419,ENSP00000225792,ENSP00000228251,ENSP00000231004,ENSP00000240185,ENSP00000250916,ENSP00000254108,ENSP00000254719,ENSP00000256383,ENSP00000261531,ENSP00000261600,ENSP00000262367,ENSP00000262887,ENSP00000263274,ENSP00000265073,ENSP00000265433,ENSP00000269321,ENSP00000276079…	ACACB,AKT2,ALDOA,ALKBH5,ANP32A,APEX1,ARHGDIA,ARRB2,AURKB,BANF1,BTK,C4orf27,CALM1,CARM1,CDK1,CHAF1A,CHAF1B,CHD1L,CHD7,CHEK1,CORO1A,CREBBP,CXXC1,DDB1,DDX1,DDX17,DDX21,DDX3X,DDX5,DEK,DHX15,DNAJB11,DNM2,DNMT1,DOCK1,EEF1A1,EEF1A2,EEF1B2,EEF1D,EEF1G,EEF2,EHD4,EIF2S1,ESRRA,FAM83G,FLNA,FMR1,FUS,G3BP1,GNB2L1,GRB2,GTF2I,HDAC2,HIST1H2BF,HMGA1,HMGA2,HMGB2,HMGB3,HNRNPA0,HNRNPA1,HNRNPA2B1,HNRNPD,HNRNPDL,HNRNPH…
GO:0060249	anatomical structure homeostasis	14	285	0.0047	ENSP00000216714,ENSP00000219150,ENSP00000254719,ENSP00000262887,ENSP00000265433,ENSP00000287437,ENSP00000340944,ENSP00000348461,ENSP00000354957,ENSP00000355759,ENSP00000358563,ENSP00000378669,ENSP00000470142,ENSP00000480186	ALDOA,APEX1,CORO1A,DKC1,NBN,NSMCE2,PARP1,POLD2,PTPN11,RAC1,RPA1,SMC5,UPF1,XRCC1
GO:0008284	positive regulation of cell population proliferation	29	878	0.0049	ENSP00000219150,ENSP00000271555,ENSP00000278572,ENSP00000283179,ENSP00000292431,ENSP00000296503,ENSP00000296930,ENSP00000307321,ENSP00000325690,ENSP00000332706,ENSP00000333667,ENSP00000337623,ENSP00000341779,ENSP00000351015,ENSP00000352516,ENSP00000358866,ENSP00000361540,ENSP00000362532,ENSP00000369270,ENSP00000375892,ENSP00000378699,ENSP00000379475,ENSP00000380734,ENSP00000383042,ENSP00000391592…	AKT2,CARM1,CDC20,CDK1,CNBP,CORO1A,DDX39B,DNMT1,FAM98B,FLNA,HDAC2,HMGA2,HMGB2,HNRNPU,HOXC10,KDM1A,MEF2D,NACC1,NAP1L1,NF1,NPM1,PPP1CC,PTPN6,PURA,RNASEH2B,RPRD1B,RPS3,RREB1,SHMT2
GO:0032091	negative regulation of protein binding	8	102	0.0049	ENSP00000256383,ENSP00000313950,ENSP00000325690,ENSP00000326031,ENSP00000338573,ENSP00000383042,ENSP00000403701,ENSP00000473172	ARRB2,AURKB,CARM1,EIF2S1,GNL3L,KDM1A,PPP1CA,RUVBL2
GO:0007084	mitotic nuclear envelope reassembly	3	7	0.0052	ENSP00000216639,ENSP00000310275,ENSP00000357283	BANF1,LMNA,VRK1
GO:0045947	negative regulation of translational initiation	4	19	0.0052	ENSP00000256383,ENSP00000356448,ENSP00000359506,ENSP00000375730	EIF2S1,FMR1,RPL13A,TPR
GO:0072594	establishment of protein localization to organelle	17	396	0.0052	ENSP00000278572,ENSP00000307889,ENSP00000339095,ENSP00000346067,ENSP00000356448,ENSP00000357283,ENSP00000357555,ENSP00000361076,ENSP00000361900,ENSP00000365694,ENSP00000375730,ENSP00000377954,ENSP00000393241,ENSP00000435777,ENSP00000449328,ENSP00000464813,ENSP00000473172	LARS,LMNA,PPP1R10,RPL13,RPL13A,RPL27,RPL7A,RPLP0,RPS13,RPS18,RPS27,RPS3,RPS7,RPSA,RUVBL2,TOMM34,TPR
GO:1903608	protein localization to cytoplasmic stress granule	3	7	0.0052	ENSP00000370745,ENSP00000382840,ENSP00000386636	DDX1,DDX3X,SSB
GO:0042770	signal transduction in response to DNA damage	8	104	0.0054	ENSP00000204517,ENSP00000265433,ENSP00000300093,ENSP00000325690,ENSP00000376345,ENSP00000378699,ENSP00000380024,ENSP00000388648	CARM1,CDK1,CHEK1,GRB2,ING4,NBN,PLK1,TFAP4
GO:1902750	negative regulation of cell cycle G2/M phase transition	6	56	0.0055	ENSP00000265433,ENSP00000300093,ENSP00000313950,ENSP00000378699,ENSP00000388648,ENSP00000437621	AURKB,CDK1,CHEK1,HMGA2,NBN,PLK1
GO:0008283	cell population proliferation	24	676	0.0056	ENSP00000230340,ENSP00000233078,ENSP00000265433,ENSP00000300093,ENSP00000302886,ENSP00000306565,ENSP00000307940,ENSP00000311677,ENSP00000313851,ENSP00000313950,ENSP00000321584,ENSP00000348461,ENSP00000353590,ENSP00000357555,ENSP00000358563,ENSP00000361298,ENSP00000364119,ENSP00000369424,ENSP00000377015,ENSP00000377601,ENSP00000378699,ENSP00000391592,ENSP00000437621,ENSP00000479617	AURKB,BYSL,CDK1,DAZAP1,DKC1,EEF2,EIF2S2,HELLS,HMGA2,IMPDH2,ISG20,KIF2C,MYH10,NBN,PA2G4,PDS5B,PICALM,PLK1,PPP1R8,PTPN6,RAC1,RBBP7,RPS27,UHRF1
GO:0051973	positive regulation of telomerase activity	5	36	0.0056	ENSP00000313199,ENSP00000313950,ENSP00000323511,ENSP00000346694,ENSP00000358563	AURKB,DKC1,HNRNPA2B1,HNRNPD,PNKP
GO:1904358	positive regulation of telomere maintenance via telomere lengthening	5	36	0.0056	ENSP00000313950,ENSP00000323511,ENSP00000341826,ENSP00000346694,ENSP00000358563	AURKB,DKC1,HNRNPA1,HNRNPA2B1,PNKP
GO:0000075	cell cycle checkpoint	11	193	0.0058	ENSP00000265433,ENSP00000300093,ENSP00000313950,ENSP00000325690,ENSP00000340944,ENSP00000356448,ENSP00000378699,ENSP00000388648,ENSP00000396704,ENSP00000411532,ENSP00000437621	AURKB,CARM1,CDK1,CHEK1,HMGA2,NBN,PLK1,PTPN11,TOP2A,TOP2B,TPR
GO:0006312	mitotic recombination	4	20	0.006	ENSP00000262887,ENSP00000287437,ENSP00000336606,ENSP00000354957	NSMCE2,RAD54B,SMC5,XRCC1
GO:0032069	regulation of nuclease activity	4	20	0.006	ENSP00000278572,ENSP00000296503,ENSP00000296930,ENSP00000388001	HMGB2,NPM1,OAS1,RPS3
GO:0048285	organelle fission	14	294	0.006	ENSP00000300093,ENSP00000307183,ENSP00000313851,ENSP00000313950,ENSP00000323421,ENSP00000336606,ENSP00000349961,ENSP00000358866,ENSP00000361298,ENSP00000361540,ENSP00000373905,ENSP00000396704,ENSP00000411532,ENSP00000480893	AURKB,CDC20,DNM2,FLNA,ING2,KIF2C,PDS5B,PLK1,RAD54B,SMC1A,SMC4,SPAST,TOP2A,TOP2B
GO:0006296	nucleotide-excision repair, DNA incision, 5'-to lesion	5	37	0.0061	ENSP00000254719,ENSP00000301764,ENSP00000355759,ENSP00000358262,ENSP00000480186	CHD1L,DDB1,PARP1,POLD2,RPA1
GO:0050793	regulation of developmental process	61	2416	0.0063	ENSP00000070846,ENSP00000216181,ENSP00000216639,ENSP00000219150,ENSP00000225792,ENSP00000228251,ENSP00000261531,ENSP00000261600,ENSP00000262367,ENSP00000269321,ENSP00000280333,ENSP00000283179,ENSP00000296503,ENSP00000300026,ENSP00000302886,ENSP00000307183,ENSP00000314129,ENSP00000325690,ENSP00000340944,ENSP00000341044,ENSP00000341779,ENSP00000348461,ENSP00000351015,ENSP00000352516,ENSP00000353590…	ACACB,ALDOA,ARHGDIA,ARRB2,BTK,CARM1,CBFB,CDC20,CDK1,CHD7,CORO1A,CREBBP,DDX17,DDX39B,DDX5,DDX6,DNM2,DNMT1,DOCK1,ELAVL1,ESRRA,FLNA,FMR1,GNB2L1,GTF2I,HDAC2,HMGA1,HMGA2,HMGB2,HNRNPU,HTATIP2,ING2,KDM1A,LMNA,MORF4L2,MYCBP2,MYH10,MYH9,NCOA3,NF1,PA2G4,PARP1,PHF14,PKP2,PPIB,PPP1CC,PPP1R13L,PTPN11,PTPN6,RAC1,RBM19,RCC2,RREB1,SNW1,STK24,TFAP2A,TFE3,THOC1,VRK1,VRK3,YBX3
GO:0140014	mitotic nuclear division	9	136	0.0066	ENSP00000300093,ENSP00000313851,ENSP00000313950,ENSP00000323421,ENSP00000349961,ENSP00000358866,ENSP00000361298,ENSP00000361540,ENSP00000480893	AURKB,CDC20,FLNA,KIF2C,PDS5B,PLK1,SMC1A,SMC4,SPAST
GO:0075713	establishment of integrated proviral latency	3	8	0.0067	ENSP00000310275,ENSP00000370109,ENSP00000399888	BANF1,HMGA1,PSIP1
GO:1903902	positive regulation of viral life cycle	6	59	0.0068	ENSP00000300026,ENSP00000301764,ENSP00000354720,ENSP00000359506,ENSP00000382840,ENSP00000411532	DDB1,DDX3X,FMR1,PPIB,SMC3,TOP2A
GO:0006293	nucleotide-excision repair, preincision complex stabilization	4	21	0.0069	ENSP00000254719,ENSP00000301764,ENSP00000355759,ENSP00000358262	CHD1L,DDB1,PARP1,RPA1
GO:0048025	negative regulation of mRNA splicing, via spliceosome	4	21	0.0069	ENSP00000221419,ENSP00000307863,ENSP00000346694,ENSP00000359645	HNRNPA2B1,HNRNPL,RBMX,U2AF2
GO:2001022	positive regulation of response to DNA damage stimulus	7	84	0.0074	ENSP00000225792,ENSP00000262887,ENSP00000278572,ENSP00000302111,ENSP00000355759,ENSP00000359506,ENSP00000437621	DDX5,FMR1,HMGA2,MGMT,PARP1,RPS3,XRCC1
GO:0000280	nuclear division	13	268	0.0077	ENSP00000300093,ENSP00000307183,ENSP00000313851,ENSP00000313950,ENSP00000323421,ENSP00000336606,ENSP00000349961,ENSP00000358866,ENSP00000361298,ENSP00000361540,ENSP00000396704,ENSP00000411532,ENSP00000480893	AURKB,CDC20,FLNA,ING2,KIF2C,PDS5B,PLK1,RAD54B,SMC1A,SMC4,SPAST,TOP2A,TOP2B
GO:0031935	regulation of chromatin silencing	4	22	0.008	ENSP00000350676,ENSP00000352516,ENSP00000399888,ENSP00000479617	DNMT1,HMGA1,PHF8,UHRF1
GO:0051099	positive regulation of binding	10	172	0.0085	ENSP00000221419,ENSP00000224073,ENSP00000256383,ENSP00000296503,ENSP00000338573,ENSP00000355759,ENSP00000359506,ENSP00000359531,ENSP00000383042,ENSP00000437621	EDF1,EIF2S1,FMR1,GNL3L,GTF2B,HMGA2,HMGB2,HNRNPL,KDM1A,PARP1
GO:0010835	regulation of protein ADP-ribosylation	3	9	0.0086	ENSP00000262887,ENSP00000323511,ENSP00000406598	C4orf27,PNKP,XRCC1
GO:0014070	response to organic cyclic compound	28	873	0.0086	ENSP00000204517,ENSP00000216714,ENSP00000225792,ENSP00000231004,ENSP00000283179,ENSP00000296503,ENSP00000296930,ENSP00000302111,ENSP00000307940,ENSP00000311747,ENSP00000313199,ENSP00000325690,ENSP00000341044,ENSP00000346120,ENSP00000346694,ENSP00000355759,ENSP00000361066,ENSP00000369424,ENSP00000370745,ENSP00000373905,ENSP00000378699,ENSP00000380033,ENSP00000383042,ENSP00000384851,ENSP00000430432…	ACACB,APEX1,CARM1,CDK1,DDX1,DDX17,DDX21,DDX5,DNM2,EEF2,ESRRA,HDAC2,HMGB2,HNRNPA2B1,HNRNPD,HNRNPU,KDM1A,LOX,MGMT,NCOA3,NPM1,PARP1,RBBP7,RBM14,RPL27,RUVBL2,SAFB,TFAP4
GO:0016584	nucleosome positioning	3	9	0.0086	ENSP00000283131,ENSP00000307705,ENSP00000339566	HIST1H1C,HIST1H1E,SMARCA5
GO:0045876	positive regulation of sister chromatid cohesion	3	9	0.0086	ENSP00000287437,ENSP00000349748,ENSP00000354957	NSMCE2,SFPQ,SMC5
GO:0022616	DNA strand elongation	4	23	0.0091	ENSP00000263274,ENSP00000265433,ENSP00000355759,ENSP00000480186	LIG1,NBN,PARP1,POLD2
GO:0051716	cellular response to stimulus	130	6212	0.0099	ENSP00000204517,ENSP00000216181,ENSP00000216297,ENSP00000216714,ENSP00000219150,ENSP00000220325,ENSP00000221419,ENSP00000225792,ENSP00000228251,ENSP00000240185,ENSP00000250916,ENSP00000254108,ENSP00000254719,ENSP00000256383,ENSP00000261531,ENSP00000261600,ENSP00000262367,ENSP00000262887,ENSP00000263274,ENSP00000265073,ENSP00000265433,ENSP00000269321,ENSP00000276079,ENSP00000278412,ENSP00000278572…	AKT2,ALKBH5,ANP32A,APEX1,ARHGDIA,ARRB2,AURKB,BTK,C4orf27,CALM1,CARM1,CDK1,CHAF1A,CHAF1B,CHD1L,CHEK1,CORO1A,CREBBP,CXXC1,DDB1,DDX1,DDX17,DDX3X,DDX5,DEK,DNAJB11,DNM2,DNMT1,DOCK1,EEF1A1,EEF1D,EEF2,EHD4,EIF2S1,ESRRA,FAM83G,FLNA,FMR1,FUS,G3BP1,GNB2L1,GRB2,GTF2I,HDAC2,HMGA1,HMGA2,HMGB2,HNRNPA1,HNRNPA2B1,HNRNPD,HNRNPDL,HNRNPH1,HNRNPL,HNRNPU,HP1BP3,IMPDH2,ING2,ING4,ISG20,KAT6B,KDM1A,KLF16,LARS,LIG1,LIG3,…
GO:0045930	negative regulation of mitotic cell cycle	12	243	0.0102	ENSP00000265433,ENSP00000300093,ENSP00000313950,ENSP00000323065,ENSP00000325690,ENSP00000356448,ENSP00000365694,ENSP00000378699,ENSP00000388648,ENSP00000396704,ENSP00000411532,ENSP00000437621	AURKB,CARM1,CDK1,CHEK1,GADD45GIP1,HMGA2,NBN,PLK1,PPP1R10,TOP2A,TOP2B,TPR
GO:0070507	regulation of microtubule cytoskeleton organization	10	177	0.0102	ENSP00000278572,ENSP00000283179,ENSP00000296930,ENSP00000300093,ENSP00000311747,ENSP00000323421,ENSP00000348461,ENSP00000354720,ENSP00000356448,ENSP00000388648	CHEK1,HNRNPU,NPM1,PLK1,RAC1,RBM14,RPS3,SMC1A,SMC3,TPR
GO:1901990	regulation of mitotic cell cycle phase transition	15	351	0.0104	ENSP00000204517,ENSP00000216714,ENSP00000265433,ENSP00000287437,ENSP00000300093,ENSP00000301764,ENSP00000313950,ENSP00000325690,ENSP00000337623,ENSP00000356448,ENSP00000364585,ENSP00000378699,ENSP00000382840,ENSP00000391592,ENSP00000437621	APEX1,AURKB,CARM1,CDK1,DDB1,DDX3X,HMGA2,NBN,NSMCE2,PLK1,PTPN6,RCC2,RNASEH2B,TFAP4,TPR
GO:0031570	DNA integrity checkpoint	9	147	0.0106	ENSP00000265433,ENSP00000300093,ENSP00000325690,ENSP00000340944,ENSP00000378699,ENSP00000388648,ENSP00000396704,ENSP00000411532,ENSP00000437621	CARM1,CDK1,CHEK1,HMGA2,NBN,PLK1,PTPN11,TOP2A,TOP2B
GO:1902415	regulation of mRNA binding	3	10	0.0108	ENSP00000221419,ENSP00000325690,ENSP00000359506	CARM1,FMR1,HNRNPL
GO:0006352	DNA-templated transcription, initiation	11	213	0.0115	ENSP00000261531,ENSP00000262367,ENSP00000283131,ENSP00000340271,ENSP00000359531,ENSP00000367029,ENSP00000384851,ENSP00000415151,ENSP00000420588,ENSP00000446880,ENSP00000460070	BAZ2A,CBFB,CREBBP,ESRRA,GTF2B,GTF2I,POLR1E,SMARCA5,SNW1,TAF3,TFAM
GO:0006605	protein targeting	14	318	0.0115	ENSP00000278572,ENSP00000307889,ENSP00000339095,ENSP00000346067,ENSP00000357555,ENSP00000361076,ENSP00000361900,ENSP00000361930,ENSP00000375730,ENSP00000377954,ENSP00000393241,ENSP00000435777,ENSP00000449328,ENSP00000464813	LARS,RPL13,RPL13A,RPL27,RPL7A,RPLP0,RPS13,RPS18,RPS27,RPS3,RPS7,RPSA,TOMM34,YWHAB
GO:0051321	meiotic cell cycle	11	214	0.0119	ENSP00000216181,ENSP00000265433,ENSP00000300093,ENSP00000307183,ENSP00000323421,ENSP00000336606,ENSP00000349961,ENSP00000354720,ENSP00000364639,ENSP00000396704,ENSP00000411532	ING2,MYH9,NBN,PLK1,RAD54B,RBM7,SMC1A,SMC3,SMC4,TOP2A,TOP2B
GO:0048525	negative regulation of viral process	7	93	0.0123	ENSP00000204517,ENSP00000240185,ENSP00000306565,ENSP00000310275,ENSP00000388001,ENSP00000404121,ENSP00000437621	BANF1,HMGA2,ILF3,ISG20,OAS1,TARDBP,TFAP4
GO:0034605	cellular response to heat	5	45	0.0126	ENSP00000256383,ENSP00000351015,ENSP00000356448,ENSP00000369424,ENSP00000430432	EIF2S1,HDAC2,NF1,RBBP7,TPR
GO:0042274	ribosomal small subunit biogenesis	6	68	0.0127	ENSP00000225298,ENSP00000230340,ENSP00000301364,ENSP00000339095,ENSP00000346067,ENSP00000357555	BYSL,RPS27,RPS7,RPSA,TSR1,UTP18
GO:0051783	regulation of nuclear division	10	184	0.0131	ENSP00000283179,ENSP00000287437,ENSP00000300093,ENSP00000323421,ENSP00000354720,ENSP00000354957,ENSP00000356448,ENSP00000361540,ENSP00000362937,ENSP00000388648	CDC20,CHEK1,HNRNPU,NSMCE2,PLK1,RCC1,SMC1A,SMC3,SMC5,TPR
GO:2000765	regulation of cytoplasmic translation	4	26	0.0131	ENSP00000228251,ENSP00000307940,ENSP00000359506,ENSP00000375730	EEF2,FMR1,RPL13A,YBX3
GO:0090343	positive regulation of cell aging	3	11	0.0132	ENSP00000357283,ENSP00000399888,ENSP00000437621	HMGA1,HMGA2,LMNA
GO:0007093	mitotic cell cycle checkpoint	9	153	0.0133	ENSP00000265433,ENSP00000300093,ENSP00000313950,ENSP00000325690,ENSP00000356448,ENSP00000378699,ENSP00000396704,ENSP00000411532,ENSP00000437621	AURKB,CARM1,CDK1,HMGA2,NBN,PLK1,TOP2A,TOP2B,TPR
GO:0048545	response to steroid hormone	14	324	0.0133	ENSP00000204517,ENSP00000225792,ENSP00000231004,ENSP00000283179,ENSP00000296503,ENSP00000311747,ENSP00000325690,ENSP00000355759,ENSP00000361066,ENSP00000369424,ENSP00000380033,ENSP00000384851,ENSP00000464813,ENSP00000467423	CARM1,DDX17,DDX5,ESRRA,HMGB2,HNRNPU,LOX,NCOA3,PARP1,RBBP7,RBM14,RPL27,SAFB,TFAP4
GO:0000738	DNA catabolic process, exonucleolytic	2	2	0.0149	ENSP00000306565,ENSP00000366396	ISG20,XRN2
GO:0032796	uropod organization	2	2	0.0149	ENSP00000216181,ENSP00000219150	CORO1A,MYH9
GO:0033277	abortive mitotic cell cycle	2	2	0.0149	ENSP00000340944,ENSP00000391592	PTPN11,PTPN6
GO:0072657	protein localization to membrane	16	405	0.0149	ENSP00000070846,ENSP00000278572,ENSP00000307889,ENSP00000331678,ENSP00000339095,ENSP00000346067,ENSP00000349259,ENSP00000357555,ENSP00000358866,ENSP00000361076,ENSP00000375730,ENSP00000375892,ENSP00000393241,ENSP00000435777,ENSP00000449328,ENSP00000464813	AKT2,FLNA,PKP2,PKP3,RPL13,RPL13A,RPL27,RPL7A,RPLP0,RPS13,RPS18,RPS27,RPS3,RPS7,RPSA,SPTBN1
GO:0090402	oncogene-induced cell senescence	2	2	0.0149	ENSP00000399888,ENSP00000437621	HMGA1,HMGA2
GO:0106005	RNA 5'-cap (guanine-N7)-methylation	2	2	0.0149	ENSP00000307181,ENSP00000372804	FAM103A1,RNMT
GO:1903518	positive regulation of single strand break repair	2	2	0.0149	ENSP00000262887,ENSP00000355759	PARP1,XRCC1
GO:1905663	positive regulation of telomerase RNA reverse transcriptase activity	2	2	0.0149	ENSP00000313199,ENSP00000346694	HNRNPA2B1,HNRNPD
GO:0000910	cytokinesis	6	71	0.0151	ENSP00000216181,ENSP00000300093,ENSP00000313950,ENSP00000349259,ENSP00000353590,ENSP00000480893	AURKB,MYH10,MYH9,PLK1,SPAST,SPTBN1
GO:0034599	cellular response to oxidative stress	11	222	0.0151	ENSP00000216714,ENSP00000256383,ENSP00000278572,ENSP00000302111,ENSP00000313199,ENSP00000355759,ENSP00000365730,ENSP00000373905,ENSP00000378699,ENSP00000430432,ENSP00000483570	APEX1,BTK,CDK1,DNM2,EIF2S1,HDAC2,HNRNPD,MGMT,PARP1,RPS3,STK24
GO:0000722	telomere maintenance via recombination	3	12	0.0158	ENSP00000262887,ENSP00000287437,ENSP00000354957	NSMCE2,SMC5,XRCC1
GO:0007077	mitotic nuclear envelope disassembly	3	12	0.0158	ENSP00000216639,ENSP00000300093,ENSP00000378699	CDK1,PLK1,VRK1
GO:0035404	histone-serine phosphorylation	3	12	0.0158	ENSP00000216639,ENSP00000313950,ENSP00000437621	AURKB,HMGA2,VRK1
GO:0043922	negative regulation by host of viral transcription	3	12	0.0158	ENSP00000204517,ENSP00000240185,ENSP00000437621	HMGA2,TARDBP,TFAP4
GO:0072331	signal transduction by p53 class mediator	8	128	0.0163	ENSP00000204517,ENSP00000225792,ENSP00000261531,ENSP00000265433,ENSP00000325690,ENSP00000370968,ENSP00000378699,ENSP00000380024	CARM1,CDK1,DDX5,ING4,MYBBP1A,NBN,SNW1,TFAP4
GO:0018209	peptidyl-serine modification	10	192	0.0168	ENSP00000216639,ENSP00000300093,ENSP00000313950,ENSP00000354522,ENSP00000355759,ENSP00000375892,ENSP00000378699,ENSP00000406598,ENSP00000437621,ENSP00000469880	AKT2,AURKB,C4orf27,CDK1,HMGA2,PARP1,PLK1,TOP1,VRK1,VRK3
GO:0043967	histone H4 acetylation	5	49	0.0168	ENSP00000318297,ENSP00000320566,ENSP00000380024,ENSP00000394417,ENSP00000473172	ING3,ING4,MORF4L2,RUVBL1,RUVBL2
GO:0055013	cardiac muscle cell development	5	49	0.0168	ENSP00000283179,ENSP00000347852,ENSP00000353590,ENSP00000357283,ENSP00000378699	CDK1,HNRNPU,LMNA,MYH10,SORBS2
GO:0006979	response to oxidative stress	15	373	0.0169	ENSP00000216714,ENSP00000256383,ENSP00000262887,ENSP00000278572,ENSP00000302111,ENSP00000307940,ENSP00000313199,ENSP00000323511,ENSP00000355759,ENSP00000365730,ENSP00000370109,ENSP00000373905,ENSP00000378699,ENSP00000430432,ENSP00000483570	APEX1,BTK,CDK1,DNM2,EEF2,EIF2S1,HDAC2,HNRNPD,MGMT,PARP1,PNKP,PSIP1,RPS3,STK24,XRCC1
GO:0007088	regulation of mitotic nuclear division	9	160	0.0169	ENSP00000283179,ENSP00000287437,ENSP00000300093,ENSP00000323421,ENSP00000354720,ENSP00000354957,ENSP00000356448,ENSP00000362937,ENSP00000388648	CHEK1,HNRNPU,NSMCE2,PLK1,RCC1,SMC1A,SMC3,SMC5,TPR
GO:0000070	mitotic sister chromatid segregation	7	101	0.0177	ENSP00000300093,ENSP00000313851,ENSP00000313950,ENSP00000323421,ENSP00000349961,ENSP00000361298,ENSP00000361540	AURKB,CDC20,KIF2C,PDS5B,PLK1,SMC1A,SMC4
GO:0006294	nucleotide-excision repair, preincision complex assembly	4	29	0.0177	ENSP00000254719,ENSP00000301764,ENSP00000355759,ENSP00000358262	CHD1L,DDB1,PARP1,RPA1
GO:1904357	negative regulation of telomere maintenance via telomere lengthening	4	29	0.0177	ENSP00000283179,ENSP00000338573,ENSP00000341826,ENSP00000355759	GNL3L,HNRNPA1,HNRNPU,PARP1
GO:0055015	ventricular cardiac muscle cell development	3	13	0.0185	ENSP00000353590,ENSP00000357283,ENSP00000378699	CDK1,LMNA,MYH10
GO:0080134	regulation of response to stress	36	1299	0.0185	ENSP00000225792,ENSP00000228251,ENSP00000254719,ENSP00000261600,ENSP00000262367,ENSP00000262887,ENSP00000276079,ENSP00000278572,ENSP00000296503,ENSP00000296930,ENSP00000302111,ENSP00000307183,ENSP00000311747,ENSP00000337623,ENSP00000340944,ENSP00000343966,ENSP00000349748,ENSP00000352438,ENSP00000355759,ENSP00000357283,ENSP00000359506,ENSP00000365694,ENSP00000365730,ENSP00000368565,ENSP00000369270…	ARRB2,BTK,CHEK1,CREBBP,DDX39B,DDX5,DEK,DNAJC2,FMR1,GNB2L1,HMGA1,HMGA2,HMGB2,ING2,KDM1A,LMNA,MGMT,NONO,NPM1,PARP1,PCBP2,PPP1R10,PSPC1,PTPN11,PTPN6,RBM14,RNASEH2B,RPA1,RPS3,RREB1,SFPQ,STK24,THOC1,THOC5,XRCC1,YBX3
GO:0006283	transcription-coupled nucleotide-excision repair	6	75	0.0187	ENSP00000254719,ENSP00000262887,ENSP00000263274,ENSP00000301764,ENSP00000367787,ENSP00000480186	DDB1,LIG1,LIG3,POLD2,RPA1,XRCC1
GO:0033045	regulation of sister chromatid segregation	6	75	0.0187	ENSP00000283179,ENSP00000287437,ENSP00000300093,ENSP00000349748,ENSP00000354957,ENSP00000356448	HNRNPU,NSMCE2,PLK1,SFPQ,SMC5,TPR
GO:0061061	muscle structure development	17	457	0.0188	ENSP00000070846,ENSP00000216181,ENSP00000225792,ENSP00000271555,ENSP00000283179,ENSP00000307940,ENSP00000316950,ENSP00000347852,ENSP00000351015,ENSP00000353590,ENSP00000357283,ENSP00000362107,ENSP00000378699,ENSP00000380033,ENSP00000383042,ENSP00000392028,ENSP00000407487	CDK1,CHD7,DDX17,DDX5,EEF2,FHL3,HNRNPU,KDM1A,LMNA,MEF2D,MYEF2,MYH10,MYH9,NF1,PKP2,SORBS2,UNC45A
GO:0060968	regulation of gene silencing	7	103	0.0193	ENSP00000225792,ENSP00000350676,ENSP00000352516,ENSP00000359506,ENSP00000385269,ENSP00000399888,ENSP00000479617	DDX5,DNMT1,ELAVL1,FMR1,HMGA1,PHF8,UHRF1
GO:0030261	chromosome condensation	4	30	0.0194	ENSP00000349961,ENSP00000378699,ENSP00000411532,ENSP00000437621	CDK1,HMGA2,SMC4,TOP2A
GO:0042127	regulation of cell population proliferation	42	1594	0.0195	ENSP00000204517,ENSP00000219150,ENSP00000271555,ENSP00000278572,ENSP00000283179,ENSP00000292431,ENSP00000296503,ENSP00000296930,ENSP00000307183,ENSP00000307321,ENSP00000312625,ENSP00000313851,ENSP00000325690,ENSP00000332706,ENSP00000333667,ENSP00000337623,ENSP00000341779,ENSP00000351015,ENSP00000352516,ENSP00000357283,ENSP00000358866,ENSP00000361540,ENSP00000362532,ENSP00000366604,ENSP00000368924…	AKT2,BTK,CARM1,CDC20,CDK1,CNBP,CORO1A,DDX39B,DNMT1,ESRRA,FAM98B,FLNA,GRB2,HDAC2,HMGA1,HMGA2,HMGB2,HNRNPU,HOXC10,HP1BP3,ING2,ING4,KDM1A,LMNA,MEF2D,NACC1,NAP1L1,NF1,NPM1,PDS5B,PHF14,PPP1CC,PTPN6,PURA,RNASEH2B,RPRD1B,RPS3,RREB1,SF1,SHMT2,TFAP2A,TFAP4
GO:0045071	negative regulation of viral genome replication	5	52	0.0206	ENSP00000306565,ENSP00000310275,ENSP00000388001,ENSP00000404121,ENSP00000437621	BANF1,HMGA2,ILF3,ISG20,OAS1
GO:1902749	regulation of cell cycle G2/M phase transition	9	167	0.0215	ENSP00000265433,ENSP00000296930,ENSP00000300093,ENSP00000313950,ENSP00000337623,ENSP00000364585,ENSP00000378699,ENSP00000388648,ENSP00000437621	AURKB,CDK1,CHEK1,HMGA2,NBN,NPM1,PLK1,RCC2,RNASEH2B
GO:0034501	protein localization to kinetochore	3	14	0.0216	ENSP00000313950,ENSP00000364585,ENSP00000378699	AURKB,CDK1,RCC2
GO:0062033	positive regulation of mitotic sister chromatid segregation	3	14	0.0216	ENSP00000283179,ENSP00000287437,ENSP00000354957	HNRNPU,NSMCE2,SMC5
GO:0071407	cellular response to organic cyclic compound	18	505	0.0216	ENSP00000204517,ENSP00000216714,ENSP00000225792,ENSP00000283179,ENSP00000296930,ENSP00000302111,ENSP00000311747,ENSP00000313199,ENSP00000325690,ENSP00000346694,ENSP00000361066,ENSP00000373905,ENSP00000380033,ENSP00000383042,ENSP00000384851,ENSP00000430432,ENSP00000467423,ENSP00000473172	APEX1,CARM1,DDX17,DDX5,DNM2,ESRRA,HDAC2,HNRNPA2B1,HNRNPD,HNRNPU,KDM1A,MGMT,NCOA3,NPM1,RBM14,RUVBL2,SAFB,TFAP4
GO:0032781	positive regulation of ATPase activity	5	53	0.022	ENSP00000283179,ENSP00000368565,ENSP00000373905,ENSP00000414398,ENSP00000479617	DNAJB11,DNAJC2,DNM2,HNRNPU,UHRF1
GO:0043388	positive regulation of DNA binding	5	53	0.022	ENSP00000224073,ENSP00000296503,ENSP00000355759,ENSP00000359531,ENSP00000437621	EDF1,GTF2B,HMGA2,HMGB2,PARP1
GO:0006288	base-excision repair, DNA ligation	2	3	0.0223	ENSP00000262887,ENSP00000367787	LIG3,XRCC1
GO:0010836	negative regulation of protein ADP-ribosylation	2	3	0.0223	ENSP00000262887,ENSP00000323511	PNKP,XRCC1
GO:0018312	peptidyl-serine ADP-ribosylation	2	3	0.0223	ENSP00000355759,ENSP00000406598	C4orf27,PARP1
GO:0035986	senescence-associated heterochromatin focus assembly	2	3	0.0223	ENSP00000399888,ENSP00000437621	HMGA1,HMGA2
GO:0098502	DNA dephosphorylation	2	3	0.0223	ENSP00000216714,ENSP00000323511	APEX1,PNKP
GO:1990120	messenger ribonucleoprotein complex assembly	2	3	0.0223	ENSP00000266679,ENSP00000345412	CPSF6,CPSF7
GO:0030518	intracellular steroid hormone receptor signaling pathway	6	79	0.0227	ENSP00000225792,ENSP00000311747,ENSP00000325690,ENSP00000361066,ENSP00000380033,ENSP00000467423	CARM1,DDX17,DDX5,NCOA3,RBM14,SAFB
GO:0090398	cellular senescence	4	32	0.023	ENSP00000287437,ENSP00000354957,ENSP00000399888,ENSP00000437621	HMGA1,HMGA2,NSMCE2,SMC5
GO:0034724	DNA replication-independent nucleosome organization	5	54	0.0231	ENSP00000216297,ENSP00000283131,ENSP00000296930,ENSP00000318297,ENSP00000369424	NPM1,RBBP7,RUVBL1,SMARCA5,SUPT16H
GO:0045184	establishment of protein localization	39	1467	0.0232	ENSP00000216181,ENSP00000261600,ENSP00000278572,ENSP00000296930,ENSP00000300093,ENSP00000307863,ENSP00000307889,ENSP00000326261,ENSP00000337632,ENSP00000339095,ENSP00000346067,ENSP00000346694,ENSP00000349259,ENSP00000356448,ENSP00000357283,ENSP00000357555,ENSP00000358866,ENSP00000361076,ENSP00000361900,ENSP00000361930,ENSP00000364585,ENSP00000365694,ENSP00000373905,ENSP00000375730,ENSP00000375892…	AKT2,ALKBH5,ALYREF,ARRB2,DDX39B,DNM2,FLNA,HNRNPA2B1,LARS,LMNA,MYH9,NPM1,NXF1,PLK1,PPP1R10,RCC2,RPL13,RPL13A,RPL27,RPL7A,RPLP0,RPS13,RPS18,RPS27,RPS3,RPS7,RPSA,RUVBL2,SARNP,SPTBN1,SRRM1,SSB,THOC1,THOC5,TOMM34,TPR,U2AF2,UPF1,YWHAB
GO:0033036	macromolecule localization	55	2268	0.0236	ENSP00000070846,ENSP00000216181,ENSP00000254719,ENSP00000261600,ENSP00000278572,ENSP00000283179,ENSP00000296930,ENSP00000300093,ENSP00000307863,ENSP00000307889,ENSP00000313950,ENSP00000325690,ENSP00000326261,ENSP00000331678,ENSP00000337632,ENSP00000339095,ENSP00000340271,ENSP00000341044,ENSP00000341826,ENSP00000346067,ENSP00000346694,ENSP00000349259,ENSP00000356448,ENSP00000357283,ENSP00000357555…	ACACB,AKT2,ALKBH5,ALYREF,ARRB2,AURKB,CARM1,CDK1,DDX1,DDX39B,DDX3X,DKC1,DNM2,FLNA,FMR1,HDLBP,HNRNPA1,HNRNPA2B1,HNRNPA3,HNRNPU,LARS,LMNA,MYH9,NPM1,NXF1,PKP2,PKP3,PLK1,PPP1R10,RCC2,RPA1,RPL13,RPL13A,RPL27,RPL7A,RPLP0,RPS13,RPS18,RPS27,RPS3,RPS7,RPSA,RUVBL2,SARNP,SPTBN1,SRRM1,SSB,TAF3,THOC1,THOC5,TOMM34,TPR,U2AF2,UPF1,YWHAB
GO:0034401	chromatin organization involved in regulation of transcription	7	108	0.0236	ENSP00000283131,ENSP00000332194,ENSP00000377601,ENSP00000388648,ENSP00000394417,ENSP00000430432,ENSP00000446880	BAZ2A,CHEK1,HDAC2,HELLS,HIST2H2AC,MORF4L2,SMARCA5
GO:0012501	programmed cell death	30	1042	0.0237	ENSP00000070846,ENSP00000225792,ENSP00000261531,ENSP00000261600,ENSP00000263384,ENSP00000265433,ENSP00000271555,ENSP00000278572,ENSP00000280333,ENSP00000296503,ENSP00000331678,ENSP00000351015,ENSP00000354522,ENSP00000355759,ENSP00000358616,ENSP00000362576,ENSP00000365730,ENSP00000370968,ENSP00000375892,ENSP00000378699,ENSP00000380024,ENSP00000382840,ENSP00000388648,ENSP00000391592,ENSP00000392985…	AKT2,API5,BTK,CDK1,CHEK1,DDX3X,DDX5,DOCK1,FAM32A,GNB2L1,HMGB2,HTATIP2,ING4,MEF2D,MYBBP1A,NBN,NF1,PARP1,PKP2,PKP3,PPP1R13L,PTPN6,RPS3,SMNDC1,SNW1,STK24,THOC1,TOP1,TOP2A,YARS
GO:0043066	negative regulation of apoptotic process	26	859	0.0237	ENSP00000219150,ENSP00000228251,ENSP00000269321,ENSP00000276079,ENSP00000296503,ENSP00000296930,ENSP00000300093,ENSP00000301764,ENSP00000302111,ENSP00000302886,ENSP00000307183,ENSP00000313950,ENSP00000352516,ENSP00000357283,ENSP00000358866,ENSP00000365694,ENSP00000368924,ENSP00000375892,ENSP00000378699,ENSP00000382840,ENSP00000383042,ENSP00000392985,ENSP00000403701,ENSP00000430432,ENSP00000431391…	AKT2,API5,ARHGDIA,ARRB2,AURKB,CDK1,CORO1A,DDB1,DDX3X,DNMT1,FLNA,HDAC2,HMGA2,HMGB2,HTATIP2,ING2,KDM1A,LMNA,MGMT,NONO,NPM1,PA2G4,PLK1,PPP1R10,TFAP2A,YBX3
GO:0051259	protein complex oligomerization	18	512	0.0237	ENSP00000220325,ENSP00000266679,ENSP00000268184,ENSP00000292431,ENSP00000296930,ENSP00000321584,ENSP00000333667,ENSP00000341044,ENSP00000345412,ENSP00000359645,ENSP00000361930,ENSP00000362937,ENSP00000367263,ENSP00000376345,ENSP00000378669,ENSP00000385269,ENSP00000388001,ENSP00000480893	ACACB,AHNAK,ALDOA,CPSF6,CPSF7,CRTC3,EHD4,ELAVL1,GRB2,IMPDH2,NACC1,NPM1,OAS1,RBMX,RCC1,SHMT2,SPAST,YWHAB
GO:0008104	protein localization	49	1966	0.024	ENSP00000070846,ENSP00000216181,ENSP00000254719,ENSP00000261600,ENSP00000278572,ENSP00000283179,ENSP00000296930,ENSP00000300093,ENSP00000307863,ENSP00000307889,ENSP00000313950,ENSP00000325690,ENSP00000326261,ENSP00000331678,ENSP00000337632,ENSP00000339095,ENSP00000340271,ENSP00000346067,ENSP00000346694,ENSP00000349259,ENSP00000356448,ENSP00000357283,ENSP00000357555,ENSP00000358866,ENSP00000361076…	AKT2,ALKBH5,ALYREF,ARRB2,AURKB,CARM1,CDK1,DDX1,DDX39B,DDX3X,DNM2,FLNA,HNRNPA2B1,HNRNPU,LARS,LMNA,MYH9,NPM1,NXF1,PKP2,PKP3,PLK1,PPP1R10,RCC2,RPA1,RPL13,RPL13A,RPL27,RPL7A,RPLP0,RPS13,RPS18,RPS27,RPS3,RPS7,RPSA,RUVBL2,SARNP,SPTBN1,SRRM1,SSB,TAF3,THOC1,THOC5,TOMM34,TPR,U2AF2,UPF1,YWHAB
GO:0007512	adult heart development	3	15	0.0243	ENSP00000271555,ENSP00000353590,ENSP00000392028	CHD7,MEF2D,MYH10
GO:0034063	stress granule assembly	3	15	0.0243	ENSP00000256383,ENSP00000377681,ENSP00000382840	DDX3X,EIF2S1,G3BP1
GO:1901989	positive regulation of cell cycle phase transition	6	81	0.0248	ENSP00000216714,ENSP00000287437,ENSP00000296930,ENSP00000364585,ENSP00000378699,ENSP00000382840	APEX1,CDK1,DDX3X,NPM1,NSMCE2,RCC2
GO:0009451	RNA modification	8	141	0.0258	ENSP00000199320,ENSP00000260129,ENSP00000307181,ENSP00000309126,ENSP00000358563,ENSP00000372804,ENSP00000382091,ENSP00000386636	ALKBH5,DIMT1,DKC1,FAM103A1,NSUN5,RNMT,SSB,TGS1
GO:0051094	positive regulation of developmental process	35	1286	0.026	ENSP00000228251,ENSP00000261531,ENSP00000269321,ENSP00000280333,ENSP00000283179,ENSP00000296503,ENSP00000300026,ENSP00000302886,ENSP00000325690,ENSP00000341044,ENSP00000341779,ENSP00000348461,ENSP00000355759,ENSP00000357283,ENSP00000358866,ENSP00000359506,ENSP00000361066,ENSP00000361540,ENSP00000368924,ENSP00000369270,ENSP00000373905,ENSP00000378699,ENSP00000379475,ENSP00000383042,ENSP00000392028…	ACACB,ARHGDIA,ARRB2,BTK,CARM1,CBFB,CDC20,CDK1,CHD7,DDX39B,DNM2,DOCK1,FLNA,FMR1,GNB2L1,HDAC2,HMGA1,HMGA2,HMGB2,HNRNPU,KDM1A,LMNA,MORF4L2,NCOA3,PA2G4,PARP1,PPIB,PPP1CC,PPP1R13L,RAC1,RBM19,RREB1,SNW1,TFAP2A,YBX3
GO:0072091	regulation of stem cell proliferation	5	56	0.026	ENSP00000283179,ENSP00000296503,ENSP00000351015,ENSP00000383042,ENSP00000437621	HMGA2,HMGB2,HNRNPU,KDM1A,NF1
GO:0006915	apoptotic process	27	915	0.0271	ENSP00000225792,ENSP00000261531,ENSP00000261600,ENSP00000263384,ENSP00000265433,ENSP00000271555,ENSP00000278572,ENSP00000280333,ENSP00000296503,ENSP00000351015,ENSP00000355759,ENSP00000358616,ENSP00000362576,ENSP00000365730,ENSP00000370968,ENSP00000375892,ENSP00000378699,ENSP00000380024,ENSP00000382840,ENSP00000388648,ENSP00000391592,ENSP00000392985,ENSP00000403902,ENSP00000411532,ENSP00000426909…	AKT2,API5,BTK,CDK1,CHEK1,DDX3X,DDX5,DOCK1,FAM32A,GNB2L1,HMGB2,HTATIP2,ING4,MEF2D,MYBBP1A,NBN,NF1,PARP1,PPP1R13L,PTPN6,RPS3,SMNDC1,SNW1,STK24,THOC1,TOP2A,YARS
GO:0009452	7-methylguanosine RNA capping	4	34	0.0271	ENSP00000260129,ENSP00000307181,ENSP00000358497,ENSP00000372804	FAM103A1,RNGTT,RNMT,TGS1
GO:0032212	positive regulation of telomere maintenance via telomerase	4	34	0.0271	ENSP00000313950,ENSP00000323511,ENSP00000341826,ENSP00000358563	AURKB,DKC1,HNRNPA1,PNKP
GO:0007064	mitotic sister chromatid cohesion	3	16	0.028	ENSP00000313851,ENSP00000323421,ENSP00000361540	CDC20,PDS5B,SMC1A
GO:1900363	regulation of mRNA polyadenylation	3	16	0.028	ENSP00000266679,ENSP00000345412,ENSP00000373772	CPSF6,CPSF7,RNF20
GO:0031060	regulation of histone methylation	5	58	0.0292	ENSP00000261531,ENSP00000352516,ENSP00000359321,ENSP00000373772,ENSP00000395929	DNMT1,MTF2,NSD1,RNF20,SNW1
GO:0042255	ribosome assembly	5	58	0.0292	ENSP00000254940,ENSP00000296930,ENSP00000346067,ENSP00000357555,ENSP00000382840	DDX3X,NIP7,NPM1,RPS27,RPSA
GO:0031145	anaphase-promoting complex-dependent catabolic process	4	35	0.0293	ENSP00000300093,ENSP00000313950,ENSP00000361540,ENSP00000378699	AURKB,CDC20,CDK1,PLK1
GO:0033260	nuclear DNA replication	4	35	0.0293	ENSP00000254719,ENSP00000263274,ENSP00000470142,ENSP00000480186	LIG1,POLD2,RPA1,UPF1
GO:0045070	positive regulation of viral genome replication	4	35	0.0293	ENSP00000300026,ENSP00000301764,ENSP00000382840,ENSP00000411532	DDB1,DDX3X,PPIB,TOP2A
GO:1901564	organonitrogen compound metabolic process	110	5281	0.0295	ENSP00000216181,ENSP00000216639,ENSP00000217182,ENSP00000231004,ENSP00000254730,ENSP00000256383,ENSP00000261308,ENSP00000262367,ENSP00000278572,ENSP00000287239,ENSP00000287437,ENSP00000292475,ENSP00000293831,ENSP00000296411,ENSP00000300026,ENSP00000300093,ENSP00000301764,ENSP00000307241,ENSP00000307705,ENSP00000307889,ENSP00000307940,ENSP00000309474,ENSP00000311747,ENSP00000313950,ENSP00000318297…	ACACB,ADRM1,AKT2,ALDOA,ARRB2,ATP5J2,AURKB,BAZ2A,BTK,C4orf27,CALM1,CARM1,CBFB,CDC20,CDK1,CHEK1,CMPK1,CREBBP,CXXC1,DDB1,DDX3X,EEF1A1,EEF1A2,EEF1B2,EEF1D,EEF1G,EEF2,EEFSEC,EIF2S1,EIF2S2,EIF4A1,ETF1,FAM98B,GADD45GIP1,GNB2L1,GRB2,GTF2B,HDAC2,HIST1H1C,HIST1H1E,HIST1H2BF,HMGA2,ILF3,IMPDH2,ING3,ING4,KAT6B,KDM1A,LARS,LMO7,LOX,METAP1,MORF4L2,MYCBP2,MYH9,NCOA3,NF1,NOSIP,NSD1,NSMCE2,OAS1,PARP1,PCBP2,PDHA1,PD…
GO:0002159	desmosome assembly	2	4	0.0304	ENSP00000070846,ENSP00000331678	PKP2,PKP3
GO:0030951	establishment or maintenance of microtubule cytoskeleton polarity	2	4	0.0304	ENSP00000357283,ENSP00000361298	KIF2C,LMNA
GO:0031508	pericentric heterochromatin assembly	2	4	0.0304	ENSP00000299736,ENSP00000377601	CENPV,HELLS
GO:0043504	mitochondrial DNA repair	2	4	0.0304	ENSP00000355759,ENSP00000367787	LIG3,PARP1
GO:0110104	mRNA alternative polyadenylation	2	4	0.0304	ENSP00000266679,ENSP00000345412	CPSF6,CPSF7
GO:0032502	developmental process	112	5401	0.0305	ENSP00000070846,ENSP00000216038,ENSP00000216181,ENSP00000216714,ENSP00000224073,ENSP00000225792,ENSP00000228251,ENSP00000230340,ENSP00000231004,ENSP00000233078,ENSP00000256383,ENSP00000261531,ENSP00000262367,ENSP00000262887,ENSP00000263274,ENSP00000265433,ENSP00000265866,ENSP00000269321,ENSP00000271555,ENSP00000283179,ENSP00000283629,ENSP00000287437,ENSP00000296503,ENSP00000296930,ENSP00000300026…	AKT2,ALKBH5,APEX1,ARHGDIA,ARRB2,AURKB,BTK,BYSL,CARM1,CBFB,CDC20,CDK1,CELF1,CHD7,CHEK1,CREBBP,CSRP2,DAZAP1,DDX1,DDX17,DDX39B,DDX5,DDX6,DNM2,DNMT1,EDF1,EEF2,EIF2S1,EIF2S2,ELAVL1,ESRRA,FHL3,FLNA,FMR1,GNB2L1,GRB2,HDAC2,HELLS,HMGA1,HMGA2,HMGB2,HMGB3,HNRNPD,HNRNPH3,HNRNPU,HOXC10,HTATIP2,IMPDH2,ING2,KDM1A,LIG1,LMNA,LOX,LYAR,MAFK,MEF2D,MGMT,MTF2,MYCBP2,MYEF2,MYH10,MYH9,NBN,NCL,NCOA3,NF1,NFIC,NOSIP,NPM1,N…
GO:2000779	regulation of double-strand break repair	5	59	0.0306	ENSP00000302111,ENSP00000380414,ENSP00000383042,ENSP00000388648,ENSP00000437621	CHEK1,DEK,HMGA2,KDM1A,MGMT
GO:0000462	maturation of SSU-rRNA from tricistronic rRNA transcript (SSU-rRNA, 5.8S rRNA, LSU-rRNA)	4	36	0.0314	ENSP00000225298,ENSP00000230340,ENSP00000301364,ENSP00000346067	BYSL,RPSA,TSR1,UTP18
GO:0031062	positive regulation of histone methylation	4	36	0.0314	ENSP00000261531,ENSP00000352516,ENSP00000359321,ENSP00000373772	DNMT1,MTF2,RNF20,SNW1
GO:0032506	cytokinetic process	3	17	0.0314	ENSP00000216181,ENSP00000313950,ENSP00000480893	AURKB,MYH9,SPAST
GO:0043923	positive regulation by host of viral transcription	3	17	0.0314	ENSP00000204517,ENSP00000261531,ENSP00000359531	GTF2B,SNW1,TFAP4
GO:0048026	positive regulation of mRNA splicing, via spliceosome	3	17	0.0314	ENSP00000233078,ENSP00000261531,ENSP00000359645	DAZAP1,RBMX,SNW1
GO:1904355	positive regulation of telomere capping	3	17	0.0314	ENSP00000313199,ENSP00000313950,ENSP00000323511	AURKB,HNRNPD,PNKP
GO:0010035	response to inorganic substance	17	491	0.033	ENSP00000216714,ENSP00000217182,ENSP00000254108,ENSP00000256383,ENSP00000278572,ENSP00000307940,ENSP00000313199,ENSP00000326031,ENSP00000341826,ENSP00000349467,ENSP00000355759,ENSP00000359506,ENSP00000365730,ENSP00000368924,ENSP00000373905,ENSP00000378699,ENSP00000430432	APEX1,CALM1,CDK1,DNM2,EEF1A2,EEF2,EIF2S1,FMR1,FUS,HDAC2,HNRNPA1,HNRNPD,PARP1,PPP1CA,RPS3,STK24,TFAP2A
GO:0010942	positive regulation of cell death	21	663	0.0332	ENSP00000204517,ENSP00000217182,ENSP00000256383,ENSP00000278572,ENSP00000320566,ENSP00000326031,ENSP00000339095,ENSP00000349748,ENSP00000351015,ENSP00000355759,ENSP00000361930,ENSP00000368924,ENSP00000370968,ENSP00000373905,ENSP00000377015,ENSP00000380024,ENSP00000382840,ENSP00000403701,ENSP00000411532,ENSP00000426909,ENSP00000437621	ARRB2,DDX3X,DNM2,EEF1A2,EIF2S1,GNB2L1,HMGA2,ING3,ING4,MYBBP1A,NF1,PARP1,PICALM,PPP1CA,RPS3,RPS7,SFPQ,TFAP2A,TFAP4,TOP2A,YWHAB
GO:0006271	DNA strand elongation involved in DNA replication	3	18	0.0355	ENSP00000263274,ENSP00000355759,ENSP00000480186	LIG1,PARP1,POLD2
GO:0009408	response to heat	6	89	0.0356	ENSP00000256383,ENSP00000351015,ENSP00000356448,ENSP00000369424,ENSP00000370109,ENSP00000430432	EIF2S1,HDAC2,NF1,PSIP1,RBBP7,TPR
GO:1901566	organonitrogen compound biosynthetic process	36	1370	0.0366	ENSP00000217182,ENSP00000254730,ENSP00000256383,ENSP00000278572,ENSP00000292475,ENSP00000293831,ENSP00000307241,ENSP00000307889,ENSP00000307940,ENSP00000321584,ENSP00000323065,ENSP00000331901,ENSP00000333667,ENSP00000339063,ENSP00000339095,ENSP00000341044,ENSP00000346067,ENSP00000353741,ENSP00000357555,ENSP00000360939,ENSP00000361076,ENSP00000362576,ENSP00000364119,ENSP00000369134,ENSP00000375730…	ACACB,ALDOA,ATP5J2,CMPK1,DDX3X,EEF1A1,EEF1A2,EEF1B2,EEF1D,EEF1G,EEF2,EEFSEC,EIF2S1,EIF2S2,EIF4A1,ETF1,GADD45GIP1,GNB2L1,IMPDH2,LARS,OAS1,PDHA1,PDHB,RPL13,RPL13A,RPL27,RPL7A,RPLP0,RPS13,RPS18,RPS27,RPS3,RPS7,RPSA,SHMT2,YARS
GO:0042221	response to chemical	89	4153	0.0372	ENSP00000204517,ENSP00000216714,ENSP00000217182,ENSP00000219150,ENSP00000220325,ENSP00000221419,ENSP00000225792,ENSP00000228251,ENSP00000231004,ENSP00000254108,ENSP00000256383,ENSP00000261531,ENSP00000262367,ENSP00000262887,ENSP00000278572,ENSP00000283131,ENSP00000283179,ENSP00000287239,ENSP00000296503,ENSP00000296930,ENSP00000302111,ENSP00000306565,ENSP00000307940,ENSP00000311747,ENSP00000312625…	ACACB,AKT2,APEX1,ARRB2,BTK,CALM1,CARM1,CDK1,CHD7,CORO1A,CREBBP,CXXC1,DDX1,DDX17,DDX21,DDX3X,DDX5,DHX15,DNAJB11,DNM2,DNMT1,EEF1A1,EEF1A2,EEF1B2,EEF2,EHD4,EIF2S1,ESRRA,FAM83G,FMR1,FUS,GNB2L1,GRB2,HDAC2,HMGB2,HNRNPA0,HNRNPA1,HNRNPA2B1,HNRNPD,HNRNPDL,HNRNPH1,HNRNPL,HNRNPU,HP1BP3,IMPDH2,ISG20,KAT6B,KDM1A,LARS,LMNA,LOX,MGMT,MTF2,MYH10,NCL,NCOA3,NPM1,OAS1,PARP1,POU2F1,PPP1CA,PRPF8,PTPN11,PTPN6,RAC1,RBBP…
GO:0033047	regulation of mitotic sister chromatid segregation	5	63	0.0384	ENSP00000283179,ENSP00000287437,ENSP00000300093,ENSP00000354957,ENSP00000356448	HNRNPU,NSMCE2,PLK1,SMC5,TPR
GO:1990830	cellular response to leukemia inhibitory factor	6	91	0.039	ENSP00000283131,ENSP00000283179,ENSP00000287239,ENSP00000318195,ENSP00000359321,ENSP00000372804	HNRNPU,KAT6B,MTF2,NCL,RNMT,SMARCA5
GO:0048738	cardiac muscle tissue development	8	154	0.0393	ENSP00000070846,ENSP00000283179,ENSP00000347852,ENSP00000353590,ENSP00000357283,ENSP00000378699,ENSP00000392028,ENSP00000403902	CDK1,CHD7,HNRNPU,LMNA,MYH10,PKP2,PPP1R13L,SORBS2
GO:2000279	negative regulation of DNA biosynthetic process	4	39	0.0393	ENSP00000283179,ENSP00000338573,ENSP00000341826,ENSP00000368565	DNAJC2,GNL3L,HNRNPA1,HNRNPU
GO:0000302	response to reactive oxygen species	9	189	0.0398	ENSP00000216714,ENSP00000278572,ENSP00000307940,ENSP00000313199,ENSP00000365730,ENSP00000373905,ENSP00000378699,ENSP00000430432,ENSP00000483570	APEX1,BTK,CDK1,DNM2,EEF2,HDAC2,HNRNPD,RPS3,STK24
GO:0009266	response to temperature stimulus	8	155	0.0398	ENSP00000228251,ENSP00000256383,ENSP00000351015,ENSP00000356448,ENSP00000369424,ENSP00000370109,ENSP00000403701,ENSP00000430432	ARRB2,EIF2S1,HDAC2,NF1,PSIP1,RBBP7,TPR,YBX3
GO:0030220	platelet formation	3	19	0.0398	ENSP00000216181,ENSP00000340944,ENSP00000391592	MYH9,PTPN11,PTPN6
GO:0032876	negative regulation of DNA endoreduplication	2	5	0.0398	ENSP00000323421,ENSP00000354720	SMC1A,SMC3
GO:0033184	positive regulation of histone ubiquitination	2	5	0.0398	ENSP00000373772,ENSP00000383042	KDM1A,RNF20
GO:0034184	positive regulation of maintenance of mitotic sister chromatid cohesion	2	5	0.0398	ENSP00000287437,ENSP00000354957	NSMCE2,SMC5
GO:0043153	entrainment of circadian clock by photoperiod	3	19	0.0398	ENSP00000326031,ENSP00000341779,ENSP00000378769	PPP1CA,PPP1CB,PPP1CC
GO:0051343	positive regulation of cyclic-nucleotide phosphodiesterase activity	2	5	0.0398	ENSP00000349467,ENSP00000426909	CALM1,GNB2L1
GO:0051987	positive regulation of attachment of spindle microtubules to kinetochore	2	5	0.0398	ENSP00000283179,ENSP00000364585	HNRNPU,RCC2
GO:0060341	regulation of cellular localization	23	766	0.0398	ENSP00000219150,ENSP00000266679,ENSP00000283179,ENSP00000300093,ENSP00000338573,ENSP00000340944,ENSP00000341779,ENSP00000349259,ENSP00000349467,ENSP00000351015,ENSP00000355759,ENSP00000356448,ENSP00000357283,ENSP00000358563,ENSP00000359506,ENSP00000361930,ENSP00000375892,ENSP00000377015,ENSP00000378699,ENSP00000383042,ENSP00000391592,ENSP00000392028,ENSP00000426909	AKT2,CALM1,CDK1,CHD7,CORO1A,CPSF6,DKC1,FMR1,GNB2L1,GNL3L,HNRNPU,KDM1A,LMNA,NF1,PARP1,PICALM,PLK1,PPP1CC,PTPN11,PTPN6,SPTBN1,TPR,YWHAB
GO:0061640	cytoskeleton-dependent cytokinesis	5	64	0.0398	ENSP00000300093,ENSP00000313950,ENSP00000349259,ENSP00000353590,ENSP00000480893	AURKB,MYH10,PLK1,SPAST,SPTBN1
GO:0070934	CRD-mediated mRNA stabilization	2	5	0.0398	ENSP00000283179,ENSP00000358635	HNRNPU,SYNCRIP
GO:0071168	protein localization to chromatin	3	19	0.0398	ENSP00000300093,ENSP00000325690,ENSP00000473172	CARM1,PLK1,RUVBL2
GO:0071479	cellular response to ionizing radiation	5	64	0.0398	ENSP00000302111,ENSP00000373905,ENSP00000376345,ENSP00000383042,ENSP00000410059	DNM2,EEF1D,GRB2,KDM1A,MGMT
GO:1904044	response to aldosterone	2	5	0.0398	ENSP00000355759,ENSP00000464813	PARP1,RPL27
GO:2000370	positive regulation of clathrin-dependent endocytosis	2	5	0.0398	ENSP00000373905,ENSP00000377015	DNM2,PICALM
GO:0007051	spindle organization	7	123	0.0402	ENSP00000216181,ENSP00000278572,ENSP00000313950,ENSP00000358866,ENSP00000361540,ENSP00000362937,ENSP00000480893	AURKB,CDC20,FLNA,MYH9,RCC1,RPS3,SPAST
GO:0060548	negative regulation of cell death	27	953	0.0408	ENSP00000219150,ENSP00000228251,ENSP00000269321,ENSP00000276079,ENSP00000296503,ENSP00000296930,ENSP00000300093,ENSP00000301764,ENSP00000302111,ENSP00000302886,ENSP00000307183,ENSP00000313950,ENSP00000352516,ENSP00000357283,ENSP00000358866,ENSP00000365694,ENSP00000368924,ENSP00000375892,ENSP00000378699,ENSP00000382840,ENSP00000383042,ENSP00000392985,ENSP00000403701,ENSP00000426909,ENSP00000430432…	AKT2,API5,ARHGDIA,ARRB2,AURKB,CDK1,CORO1A,DDB1,DDX3X,DNMT1,FLNA,GNB2L1,HDAC2,HMGA2,HMGB2,HTATIP2,ING2,KDM1A,LMNA,MGMT,NONO,NPM1,PA2G4,PLK1,PPP1R10,TFAP2A,YBX3
GO:1901992	positive regulation of mitotic cell cycle phase transition	5	65	0.0415	ENSP00000216714,ENSP00000287437,ENSP00000364585,ENSP00000378699,ENSP00000382840	APEX1,CDK1,DDX3X,NSMCE2,RCC2
GO:0034614	cellular response to reactive oxygen species	7	124	0.0417	ENSP00000216714,ENSP00000278572,ENSP00000313199,ENSP00000373905,ENSP00000378699,ENSP00000430432,ENSP00000483570	APEX1,BTK,CDK1,DNM2,HDAC2,HNRNPD,RPS3
GO:0051262	protein tetramerization	8	157	0.0419	ENSP00000266679,ENSP00000268184,ENSP00000321584,ENSP00000333667,ENSP00000341044,ENSP00000345412,ENSP00000362937,ENSP00000378669	ACACB,ALDOA,CPSF6,CPSF7,CRTC3,IMPDH2,RCC1,SHMT2
GO:0031396	regulation of protein ubiquitination	9	192	0.0425	ENSP00000278572,ENSP00000300093,ENSP00000307863,ENSP00000338573,ENSP00000339095,ENSP00000361540,ENSP00000373772,ENSP00000383042,ENSP00000403701	ARRB2,CDC20,GNL3L,KDM1A,PLK1,RNF20,RPS3,RPS7,U2AF2
GO:0042789	mRNA transcription by RNA polymerase II	3	20	0.0433	ENSP00000257915,ENSP00000313199,ENSP00000358866	FLNA,HNRNPD,TFCP2
GO:0043254	regulation of protein complex assembly	15	425	0.0433	ENSP00000219150,ENSP00000254719,ENSP00000265073,ENSP00000278572,ENSP00000301764,ENSP00000340944,ENSP00000348461,ENSP00000349259,ENSP00000355759,ENSP00000358262,ENSP00000359531,ENSP00000375730,ENSP00000376345,ENSP00000382840,ENSP00000426909	CHD1L,CORO1A,DDB1,DDX3X,GNB2L1,GRB2,GTF2B,PARP1,PTPN11,RAC1,RPA1,RPL13A,RPS3,SPTBN1,SUB1
GO:2000104	negative regulation of DNA-dependent DNA replication	3	20	0.0433	ENSP00000323421,ENSP00000354720,ENSP00000367787	LIG3,SMC1A,SMC3
GO:1903313	positive regulation of mRNA metabolic process	5	66	0.0435	ENSP00000233078,ENSP00000261531,ENSP00000313199,ENSP00000359645,ENSP00000470142	DAZAP1,HNRNPD,RBMX,SNW1,UPF1
GO:0006470	protein dephosphorylation	9	194	0.0447	ENSP00000325958,ENSP00000326031,ENSP00000340944,ENSP00000341779,ENSP00000358497,ENSP00000362532,ENSP00000370196,ENSP00000378769,ENSP00000391592	PPP1CA,PPP1CB,PPP1CC,PTPMT1,PTPN11,PTPN6,RNGTT,RPRD1B,SBF1
GO:0071897	DNA biosynthetic process	6	95	0.0447	ENSP00000254719,ENSP00000263274,ENSP00000358563,ENSP00000367787,ENSP00000370968,ENSP00000480186	DKC1,LIG1,LIG3,MYBBP1A,POLD2,RPA1
GO:0032270	positive regulation of cellular protein metabolic process	38	1496	0.046	ENSP00000204517,ENSP00000216181,ENSP00000220325,ENSP00000221419,ENSP00000228251,ENSP00000261531,ENSP00000265433,ENSP00000278572,ENSP00000287437,ENSP00000296930,ENSP00000300093,ENSP00000307183,ENSP00000307940,ENSP00000313199,ENSP00000340944,ENSP00000348461,ENSP00000349467,ENSP00000352516,ENSP00000359321,ENSP00000359506,ENSP00000361540,ENSP00000365730,ENSP00000373772,ENSP00000375892,ENSP00000377015…	ADRM1,AKT2,ARRB2,CALM1,CDC20,CDK1,DDX39B,DDX3X,DNMT1,EEF2,EHD4,ELAVL1,FAM58A,FMR1,GNB2L1,HDAC2,HNRNPD,HNRNPL,ING2,KDM1A,MTF2,MYH9,NBN,NPM1,NSMCE2,PICALM,PLK1,PTPN11,RAC1,RNF20,RPS3,RUVBL2,SNW1,STK24,TFAP4,UHRF1,VRK3,YBX3
GO:0071495	cellular response to endogenous stimulus	30	1106	0.046	ENSP00000204517,ENSP00000216714,ENSP00000219150,ENSP00000225792,ENSP00000283179,ENSP00000307940,ENSP00000311747,ENSP00000313199,ENSP00000318195,ENSP00000323421,ENSP00000325690,ENSP00000339063,ENSP00000340944,ENSP00000341826,ENSP00000349168,ENSP00000352516,ENSP00000355759,ENSP00000361066,ENSP00000373647,ENSP00000373905,ENSP00000375892,ENSP00000376345,ENSP00000377954,ENSP00000380033,ENSP00000383042…	AKT2,APEX1,ARRB2,CARM1,CORO1A,DDX17,DDX5,DNM2,DNMT1,EEF1A1,EEF2,ESRRA,FAM83G,GRB2,HDAC2,HNRNPA1,HNRNPD,HNRNPH1,HNRNPU,KDM1A,LARS,NCL,NCOA3,PARP1,PTPN11,RBM14,RUVBL2,SAFB,SMC1A,TFAP4
GO:0006479	protein methylation	7	127	0.0461	ENSP00000307705,ENSP00000325690,ENSP00000339566,ENSP00000353741,ENSP00000380734,ENSP00000390475,ENSP00000395929	CARM1,CXXC1,ETF1,FAM98B,HIST1H1C,HIST1H1E,NSD1
GO:0031399	regulation of protein modification process	43	1747	0.0461	ENSP00000204517,ENSP00000220325,ENSP00000240185,ENSP00000261531,ENSP00000262887,ENSP00000265433,ENSP00000278572,ENSP00000296930,ENSP00000300093,ENSP00000307183,ENSP00000307863,ENSP00000311677,ENSP00000315630,ENSP00000323511,ENSP00000338573,ENSP00000339095,ENSP00000340944,ENSP00000348461,ENSP00000349467,ENSP00000351015,ENSP00000352516,ENSP00000359321,ENSP00000359506,ENSP00000361540,ENSP00000361930…	AKT2,ARRB2,C4orf27,CALM1,CDC20,CDK1,CHEK1,DDX3X,DNMT1,EHD4,FAM58A,FMR1,GNB2L1,GNL3L,GRB2,HDAC2,ING2,KDM1A,MTF2,NBN,NF1,NPM1,NSD1,PLK1,PNKP,PPP1R10,PPP1R8,PTPN11,PTPN6,RAC1,RNF20,RPS3,RPS7,RUVBL2,SNW1,STK24,SWAP70,TARDBP,TFAP4,U2AF2,VRK3,XRCC1,YWHAB
GO:0006275	regulation of DNA replication	6	96	0.0463	ENSP00000265433,ENSP00000323421,ENSP00000348461,ENSP00000354720,ENSP00000367787,ENSP00000378699	CDK1,LIG3,NBN,RAC1,SMC1A,SMC3
GO:0034080	CENP-A containing nucleosome assembly	4	42	0.0468	ENSP00000283131,ENSP00000296930,ENSP00000318297,ENSP00000369424	NPM1,RBBP7,RUVBL1,SMARCA5
GO:0090342	regulation of cell aging	4	42	0.0468	ENSP00000307183,ENSP00000357283,ENSP00000399888,ENSP00000437621	HMGA1,HMGA2,ING2,LMNA
GO:0007095	mitotic G2 DNA damage checkpoint	3	21	0.0476	ENSP00000265433,ENSP00000378699,ENSP00000437621	CDK1,HMGA2,NBN
GO:0009719	response to endogenous stimulus	35	1353	0.0476	ENSP00000204517,ENSP00000216714,ENSP00000219150,ENSP00000225792,ENSP00000231004,ENSP00000283179,ENSP00000296503,ENSP00000307940,ENSP00000311747,ENSP00000313199,ENSP00000318195,ENSP00000323421,ENSP00000325690,ENSP00000339063,ENSP00000340944,ENSP00000341826,ENSP00000349168,ENSP00000352516,ENSP00000355759,ENSP00000356448,ENSP00000361066,ENSP00000369424,ENSP00000373647,ENSP00000373905,ENSP00000375892…	AKT2,APEX1,ARRB2,CARM1,CORO1A,DDX17,DDX5,DNM2,DNMT1,EEF1A1,EEF2,ESRRA,FAM83G,GRB2,HDAC2,HMGB2,HNRNPA1,HNRNPD,HNRNPH1,HNRNPU,KDM1A,LARS,LOX,NCL,NCOA3,PARP1,PTPN11,RBBP7,RBM14,RPL27,RUVBL2,SAFB,SMC1A,TFAP4,TPR
GO:0014706	striated muscle tissue development	11	271	0.0476	ENSP00000070846,ENSP00000271555,ENSP00000283179,ENSP00000307940,ENSP00000347852,ENSP00000351015,ENSP00000353590,ENSP00000357283,ENSP00000378699,ENSP00000392028,ENSP00000403902	CDK1,CHD7,EEF2,HNRNPU,LMNA,MEF2D,MYH10,NF1,PKP2,PPP1R13L,SORBS2
GO:0031397	negative regulation of protein ubiquitination	5	68	0.0476	ENSP00000278572,ENSP00000307863,ENSP00000338573,ENSP00000339095,ENSP00000403701	ARRB2,GNL3L,RPS3,RPS7,U2AF2
GO:0032201	telomere maintenance via semi-conservative replication	3	21	0.0476	ENSP00000254719,ENSP00000470142,ENSP00000480186	POLD2,RPA1,UPF1
GO:0032211	negative regulation of telomere maintenance via telomerase	3	21	0.0476	ENSP00000283179,ENSP00000338573,ENSP00000341826	GNL3L,HNRNPA1,HNRNPU
GO:0071383	cellular response to steroid hormone stimulus	9	197	0.0476	ENSP00000204517,ENSP00000225792,ENSP00000283179,ENSP00000311747,ENSP00000325690,ENSP00000361066,ENSP00000380033,ENSP00000384851,ENSP00000467423	CARM1,DDX17,DDX5,ESRRA,HNRNPU,NCOA3,RBM14,SAFB,TFAP4
GO:0043065	positive regulation of apoptotic process	19	604	0.048	ENSP00000204517,ENSP00000217182,ENSP00000256383,ENSP00000278572,ENSP00000320566,ENSP00000326031,ENSP00000339095,ENSP00000349748,ENSP00000351015,ENSP00000361930,ENSP00000368924,ENSP00000370968,ENSP00000373905,ENSP00000380024,ENSP00000382840,ENSP00000403701,ENSP00000411532,ENSP00000426909,ENSP00000437621	ARRB2,DDX3X,DNM2,EEF1A2,EIF2S1,GNB2L1,HMGA2,ING3,ING4,MYBBP1A,NF1,PPP1CA,RPS3,RPS7,SFPQ,TFAP2A,TFAP4,TOP2A,YWHAB
GO:0034392	negative regulation of smooth muscle cell apoptotic process	2	6	0.0483	ENSP00000352516,ENSP00000403701	ARRB2,DNMT1
GO:0043697	cell dedifferentiation	2	6	0.0483	ENSP00000313199,ENSP00000361066	HNRNPD,NCOA3
GO:0061732	mitochondrial acetyl-CoA biosynthetic process from pyruvate	2	6	0.0483	ENSP00000307241,ENSP00000369134	PDHA1,PDHB
GO:0090166	Golgi disassembly	2	6	0.0483	ENSP00000216639,ENSP00000378699	CDK1,VRK1
GO:0098532	histone H3-K27 trimethylation	2	6	0.0483	ENSP00000307705,ENSP00000339566	HIST1H1C,HIST1H1E
GO:2000373	positive regulation of DNA topoisomerase (ATP-hydrolyzing) activity	2	6	0.0483	ENSP00000283179,ENSP00000479617	HNRNPU,UHRF1
GO:0006342	chromatin silencing	6	98	0.0488	ENSP00000283131,ENSP00000332194,ENSP00000377601,ENSP00000394417,ENSP00000430432,ENSP00000446880	BAZ2A,HDAC2,HELLS,HIST2H2AC,MORF4L2,SMARCA5
GO:0001510	RNA methylation	5	69	0.049	ENSP00000199320,ENSP00000260129,ENSP00000307181,ENSP00000309126,ENSP00000372804	DIMT1,FAM103A1,NSUN5,RNMT,TGS1
GO:0051493	regulation of cytoskeleton organization	16	477	0.0494	ENSP00000219150,ENSP00000269321,ENSP00000278572,ENSP00000283179,ENSP00000296930,ENSP00000300093,ENSP00000311747,ENSP00000315630,ENSP00000323421,ENSP00000348461,ENSP00000349259,ENSP00000354720,ENSP00000356448,ENSP00000358866,ENSP00000376345,ENSP00000388648	ARHGDIA,CHEK1,CORO1A,FLNA,GRB2,HNRNPU,NPM1,PLK1,RAC1,RBM14,RPS3,SMC1A,SMC3,SPTBN1,SWAP70,TPR
