# Supplementary material for: Nuclear Phosphoinositides: Their Regulation and Roles in Nuclear Functions
Source: MDPI journal article supplement (doi:10.3390/ijms20122991), 2019-06-19
Supplement: s1 [file supplementary_table_3.xlsx]

## Sheet: supplementary_table_3
#term ID	term description	observed gene count	background gene count	false discovery rate	matching proteins in your network (IDs)	matching proteins in your network (labels)
SM00360	RNA recognition motif	40	214	1.38e-25	ENSP00000221419,ENSP00000233078,ENSP00000240185,ENSP00000246194,ENSP00000253363,ENSP00000254108,ENSP00000265866,ENSP00000266679,ENSP00000276079,ENSP00000293677,ENSP00000307863,ENSP00000311747,ENSP00000313199,ENSP00000316042,ENSP00000316950,ENSP00000318195,ENSP00000341826,ENSP00000343966,ENSP00000345412,ENSP00000346694,ENSP00000349168,ENSP00000349748,ENSP00000358635,ENSP00000359645,ENSP00000364639…	ALYREF,CELF1,CELF2,CPSF6,CPSF7,DAZAP1,ELAVL1,EWSR1,FUS,G3BP1,HNRNPA0,HNRNPA1,HNRNPA2B1,HNRNPA3,HNRNPD,HNRNPDL,HNRNPH1,HNRNPH3,HNRNPL,HNRNPLL,LARP7,MYEF2,NCL,NONO,PSPC1,RALY,RAVER1,RBM14,RBM19,RBM34,RBM39,RBM7,RBMX,SAFB,SFPQ,SLIRP,SSB,SYNCRIP,TARDBP,U2AF2
SM00490	helicase superfamily c-terminal domain	17	105	1.08e-09	ENSP00000225792,ENSP00000283131,ENSP00000293831,ENSP00000336606,ENSP00000336741,ENSP00000346120,ENSP00000358262,ENSP00000370745,ENSP00000377601,ENSP00000379475,ENSP00000380033,ENSP00000382840,ENSP00000392028,ENSP00000416739,ENSP00000457466,ENSP00000478754,ENSP00000479504	CHD1L,CHD7,CHD9,DDX1,DDX17,DDX21,DDX39B,DDX3X,DDX5,DDX52,DDX6,DHX15,EIF4A1,HELLS,RAD54B,RECQL,SMARCA5
SM00487	DEAD-like helicases superfamily	17	109	1.22e-09	ENSP00000225792,ENSP00000283131,ENSP00000293831,ENSP00000336606,ENSP00000336741,ENSP00000346120,ENSP00000358262,ENSP00000370745,ENSP00000377601,ENSP00000379475,ENSP00000380033,ENSP00000382840,ENSP00000392028,ENSP00000416739,ENSP00000457466,ENSP00000478754,ENSP00000479504	CHD1L,CHD7,CHD9,DDX1,DDX17,DDX21,DDX39B,DDX3X,DDX5,DDX52,DDX6,DHX15,EIF4A1,HELLS,RAD54B,RECQL,SMARCA5
SM00249	PHD zinc finger	15	91	6.98e-09	ENSP00000287239,ENSP00000307183,ENSP00000320566,ENSP00000329097,ENSP00000340271,ENSP00000341805,ENSP00000350676,ENSP00000351250,ENSP00000359321,ENSP00000380024,ENSP00000385795,ENSP00000390475,ENSP00000395929,ENSP00000446880,ENSP00000479617	BAZ2A,CXXC1,ING2,ING3,ING4,KAT6B,MTF2,NSD1,PHF10,PHF14,PHF6,PHF8,TAF3,TRIM33,UHRF1
SM00513	Putative DNA-binding (bihelical) motif predicted to be involved in chromosomal organisation	6	24	0.00023	ENSP00000283179,ENSP00000301785,ENSP00000337632,ENSP00000375863,ENSP00000380414,ENSP00000467423	DEK,HNRNPU,HNRNPUL1,HNRNPUL2,SAFB,SARNP
SM00322	K homology RNA-binding domain	6	41	0.0027	ENSP00000250113,ENSP00000278572,ENSP00000352438,ENSP00000359506,ENSP00000366604,ENSP00000375836	FMR1,FXR2,HDLBP,PCBP2,RPS3,SF1
SM00526	Domain in histone families 1 and 5	4	13	0.003	ENSP00000287239,ENSP00000307705,ENSP00000312625,ENSP00000339566	HIST1H1C,HIST1H1E,HP1BP3,KAT6B
SM00968	SMC proteins Flexible Hinge Domain	3	6	0.0063	ENSP00000323421,ENSP00000349961,ENSP00000354720	SMC1A,SMC3,SMC4
SM00292	breast cancer carboxy-terminal domain	4	22	0.013	ENSP00000262887,ENSP00000265433,ENSP00000355759,ENSP00000367787	LIG3,NBN,PARP1,XRCC1
SM00156	Protein phosphatase 2A homologues, catalytic domain.	3	13	0.0233	ENSP00000326031,ENSP00000341779,ENSP00000378769	PPP1CA,PPP1CB,PPP1CC
SM00384	DNA binding domain with preference for A/T rich regions	4	28	0.0233	ENSP00000313851,ENSP00000399888,ENSP00000437621,ENSP00000446880	BAZ2A,HMGA1,HMGA2,PDS5B
SM00433	TopoisomeraseII	2	2	0.0233	ENSP00000396704,ENSP00000411532	TOP2A,TOP2B
SM00434	DNA Topoisomerase IV	2	2	0.0233	ENSP00000396704,ENSP00000411532	TOP2A,TOP2B
SM00888	EF-1 guanine nucleotide exchange domain	2	2	0.0233	ENSP00000376056,ENSP00000410059	EEF1B2,EEF1D
SM01182	Eukaryotic elongation factor 1 beta central acidic region	2	2	0.0233	ENSP00000376056,ENSP00000410059	EEF1B2,EEF1D
SM01287	Histone chaperone Rttp106-like	2	2	0.0233	ENSP00000216297,ENSP00000278412	SSRP1,SUPT16H
SM01336	Poly(ADP-ribose) polymerase and DNA-Ligase Zn-finger region	2	2	0.0233	ENSP00000355759,ENSP00000367787	LIG3,PARP1
SM00359	Putative RNA-binding Domain in PseudoUridine synthase and Archaeosine transglycosylase	2	4	0.0317	ENSP00000254940,ENSP00000358563	DKC1,NIP7
SM00592	domain in transcription and CHROMO domain helicases	2	5	0.0415	ENSP00000392028,ENSP00000457466	CHD7,CHD9
